# Supplementary material for: Organocatalytic enantioselective cross-aldol reaction of aryl ketones with heteroaromatic trifluoromethyl ketone hydrates for the synthesis of α-trifluoromethyl tertiary alcohols
Source: Royal Society of Chemistry journal article supplement (doi:10.1039/d3ob00619k), 2023-01-01
Supplement: d3ob00619k1.pdf [file d3ob00619k1.pdf]

## *Supporting Information*

### **Organocatalytic enantioselective cross-aldol reaction of aryl ketones to heteroaromatic trifluoromethyl ketone hydrates for the synthesis of $\alpha$ -trifluoromethyl tertiary alcohols**

Wei Wang,<sup>‡</sup> Zhaoliang Qin,<sup>‡</sup> Ze Tan\* and Wen Yang\*

*Advanced Catalytic Engineering Research Center of the Ministry of Education,  
College of Chemistry and Chemical Engineering, Hunan University, Changsha,  
Hunan 410082, P. R. China*

Email: yangwen@hnu.edu.cn; ztanze@gmail.com

#### **Table of Contents**

|                                                                                     |             |
|-------------------------------------------------------------------------------------|-------------|
| <b>I. General Information .....</b>                                                 | <b>S1</b>   |
| <b>II. Synthesis of Ketone Hydrate Substrates.....</b>                              | <b>S2</b>   |
| <b>III. Synthesis of <math>\alpha</math>-Trifluoromethyl Tertiary Alcohols.....</b> | <b>S5</b>   |
| <b>IV. Gram-Scale Catalytic Reaction and Product Transformations.....</b>           | <b>S33</b>  |
| <b>V. X-ray Crystallographic Analysis of Product 3aa .....</b>                      | <b>S37</b>  |
| <b>VI. References.....</b>                                                          | <b>S52</b>  |
| <b>VII. Copies of NMR Spectra.....</b>                                              | <b>S53</b>  |
| <b>VIII. HPLC Profiles.....</b>                                                     | <b>S110</b> |

## I. General Information

Flash column chromatography was performed over silica gel (200-300 mesh) purchased from Qindao Puke Co., China. All air or moisture sensitive reactions were conducted in oven-dried glassware under nitrogen atmosphere using anhydrous solvents. Anhydrous toluene was dried sodium with diphenyl ketone as an indicator, and other anhydrous solvents, such as tetrahydrofuran, methanol, and dichloromethane, were purchased from Energy Chemicals Inc. and used as received. Molecular sieves (MS) were purchased from Aldrich and treated at 120 °C in the oven for 2 h.

<sup>1</sup>H, <sup>13</sup>C, and <sup>19</sup>F NMR spectra were collected on a Bruker 400 MHz NMR spectrometer at 20 °C using peaks of CDCl<sub>3</sub> as an internal standard (<sup>1</sup>H NMR: CDCl<sub>3</sub> at 7.26 ppm, *d*<sub>6</sub>-acetone at 2.05 ppm; <sup>13</sup>C NMR: CDCl<sub>3</sub> at 77.16 ppm, *d*<sub>6</sub>-acetone at 206.26 ppm). High-resolution mass spectra were collected on a Bruker Maxis System. Melting points were measured by a melting point instrument and were uncorrected. Optical rotations were measured on a WZZ-1S polarimeter with [ $\alpha$ ]<sub>D</sub> values reported in degrees. The enantiomeric excesses were determined by chiral HPLC using a Shimadzu Prominence LC-20A instrument with Daicel chiral columns ( Chiralcel OD-H, Chiralpak AD-H or Chiralpak IC-H). Aryl ketones **2** were all purchased from Energy Chemicals Inc. and used as received. Catalyst **A-E** were prepared by the literature procedure,<sup>1-3</sup> and other catalysts were purchased from Daicel Chiral Technologies (China) Co., Ltd. and used as received.

## II. Synthesis of Ketone Hydrate Substrates

**Synthesis of ketone hydrates 1c-e.** To a solution of substituted benzothiazole (5.0 mmol) in toluene (20 mL) at  $-20\text{ }^{\circ}\text{C}$  was added dropwise trifluoroacetic anhydride (6.0 mmol) over 10 min. The mixture was stirred for 0.5 h, and triethylamine (6.0 mmol) was slowly added. After stirring at  $-20\text{ }^{\circ}\text{C}$  overnight, the resulting reaction mixture was spontaneously warmed to room temperature and stirred for 12 h. The solvent was removed in vacuo, and water (5 mL) was added to form white precipitation, which was dissolved in ethyl acetate (40 mL). The organic phase was successively washed with 1 M HCl (20 mL), water (20 mL), and brine (20 mL), dried over anhydrous  $\text{Na}_2\text{SO}_4$ , and concentrated in vacuo to afford the crude product. The pure ketone hydrate was obtained by recrystallization from petroleum ether/ethyl acetate (5:1, v/v). Ketone hydrates **1c**, **1d**, and **1e** are unknown compounds, and others are known.<sup>4-5</sup>

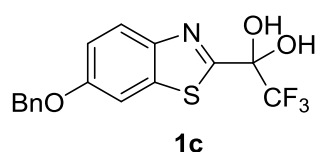

**1-(6-(Benzyloxy)benzo[d]thiazol-2-yl)-2,2,2-trifluoroethane-1,1-diol (1c)** was prepared from 6-(benzyloxy)benzothiazole (1.20 g, 5.0 mmol) according to the above procedure. Yellow solid, m.p.  $138\text{--}139\text{ }^{\circ}\text{C}$ ; 0.95 g, 54% yield.

$^1\text{H NMR}$  (400 MHz,  $d_6$ -acetone)  $\delta$  7.95 (d,  $J = 9.2\text{ Hz}$ , 1H), 7.72 (d,  $J = 2.0\text{ Hz}$ , 1H), 7.59 (s, 2H), 7.51 (d,  $J = 7.6\text{ Hz}$ , 2H), 7.40 (t,  $J = 7.6\text{ Hz}$ , 2H), 7.33 (t,  $J = 7.6\text{ Hz}$ , 1H), 7.25 (dd,  $J_1 = 8.8\text{ Hz}$ ,  $J_2 = 2.4\text{ Hz}$ , 1H), 5.22 (s, 2H) ppm.

<sup>13</sup>C NMR (100 MHz, *d*<sub>6</sub>-acetone) δ 166.0, 157.9, 147.8, 137.9, 137.4, 128.8, 128.3, 128.0, 124.6, 123.2 (q, *J* = 286.3 Hz), 117.2, 105.7, 92.8 (q, *J* = 33.0 Hz), 70.6 ppm.

<sup>19</sup>F NMR (376.5 MHz, *d*<sub>6</sub>-acetone) δ -83.6 ppm.

HRMS (ESI) *m/z*: [M-H<sub>2</sub>O]<sup>+</sup> calcd for C<sub>16</sub>H<sub>10</sub>F<sub>3</sub>NO<sub>2</sub>S 337.0382; found 337.0382.

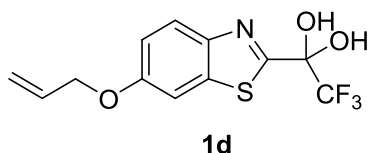

**1-(6-(Allyloxy)benzo[*d*]thiazol-2-yl)-2,2,2-trifluoroethane-1,1-diol (1d)** was prepared from 6-(allyloxy)benzo[*d*]thiazole (1.91 g, 10.0 mmol) according to the above procedure. Yellow solid, m.p. 115–117 °C; 1.38 g, 45% yield.

<sup>1</sup>H NMR (400 MHz, *d*<sub>6</sub>-acetone) δ 7.95 (d, *J* = 8.8 Hz, 1H), 7.62 (d, *J* = 2.8 Hz, 1H), 7.18 (dd, *J*<sub>1</sub> = 2.8 Hz, *J*<sub>2</sub> = 9.2 Hz, 1H), 6.13–6.06 (m, 1H), 5.44 (d, *J* = 15.6 Hz, 1H), 5.27 (d, *J* = 12.4 Hz, 1H), 4.67 (d, *J* = 5.2 Hz, 2H) ppm.

<sup>13</sup>C NMR (100 MHz, *d*<sub>6</sub>-acetone) δ 165.4, 157.3, 147.3, 137.5, 133.3, 124.2, 122.7 (q, *J* = 285.8 Hz), 117.0, 116.7, 105.1, 92.3 (q, *J* = 33.0 Hz), 69.0 ppm.

<sup>19</sup>F NMR (376.5 MHz, *d*<sub>6</sub>-acetone) δ -83.5 ppm.

HRMS (ESI) *m/z*: [M-H<sub>2</sub>O]<sup>+</sup> calcd for C<sub>12</sub>H<sub>8</sub>F<sub>3</sub>NO<sub>2</sub>S 287.0228; found 287.0226.

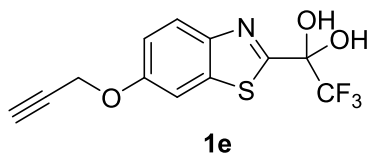

**2,2,2-Trifluoro-1-(6-(prop-2-yn-1-yloxy)benzo[*d*]thiazol-2-yl)ethane-1,1-diol (1e)** was prepared from 6-(prop-2-yn-1-yloxy)benzothiazole (0.95 g, 5.0 mmol) according to the above procedure. Yellow solid, m.p. 115–117 °C; 0.66 g, 44% yield.

**<sup>1</sup>H NMR** (400 MHz, *d*<sub>6</sub>-acetone) δ 7.98 (d, *J* = 8.8 Hz, 1H), 7.73 (s, 1H), 7.53 (s, 2H), 7.23 (d, *J* = 9.2 Hz, 1H), 4.91 (s, 2H), 3.12 (s, 1H) ppm.

**<sup>13</sup>C NMR** (100 MHz, *d*<sub>6</sub>-acetone) δ 166.3, 156.7, 148.2, 137.8, 124.7, 123.2 (q, *J* = 286.2 Hz), 117.1, 106.1, 92.8 (q, *J* = 33.0 Hz), 78.9, 76.9, 56.5 ppm.

**<sup>19</sup>F NMR** (376.5 MHz, *d*<sub>6</sub>-acetone) δ -83.6 ppm.

**HRMS** (ESI) *m/z*: [M-H<sub>2</sub>O]<sup>+</sup> calcd for C<sub>12</sub>H<sub>6</sub>F<sub>3</sub>NO<sub>2</sub>S 285.0071; found 285.0074.

### III. Synthesis of $\alpha$ -Trifluoromethyl Tertiary Alcohols

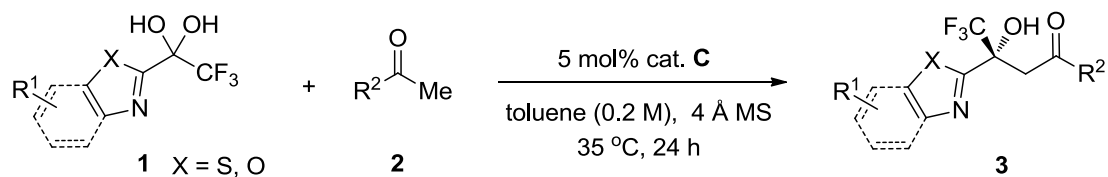

#### General procedure for organocatalytic enantioselective cross-aldol reaction.

To a 4-mL vial equipped with a magnetic stir bar, heteroaromatic trifluoromethyl ketone hydrate **1** (0.10 mmol), catalyst **C** (5 mol%), 4 Å MS (30 mg), and toluene (0.5 mL) were sequentially added. The mixture was stirred for 30 min at room temperature (35 °C in summer), and then methyl ketone **2** (3.0 or 5.0 equiv.) was added. After stirring for 11~36 h, the reaction mixture was concentrated under reduced pressure. The residue was purified by silica gel column chromatography to afford the desired chiral  $\alpha$ -trifluoromethyl tertiary alcohol **3**.

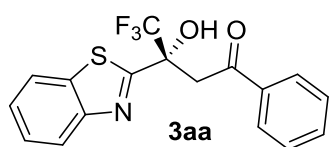

#### (S)-3-(Benzo[*d*]thiazol-2-yl)-4,4,4-trifluoro-3-hydroxy-1-phenylbutan-1-one

**(3aa)** was prepared from trifluoromethyl ketone hydrate **1a** and methyl ketone **2a** (3.0 equiv.) for 24 h according to the above general procedure (eluent: petroleum ether/ethyl acetate = 20:1 to 10:1, v/v). White solid, m.p. 134–135 °C; 29.8 mg, 85% yield.

$[\alpha]_{\text{D}}^{25} = -121.5$  ( $c = 0.26$ ,  $\text{CHCl}_3$ , 86% ee). Enantiomeric excess was determined by chiral HPLC: Daicel Chiralcel OD-H column; 8% *i*-PrOH in hexanes; 1.0 mL/min; 35 °C; retention times: 11.4 min (minor), 12.7 min (major).

$^1\text{H NMR}$  (400 MHz,  $\text{CDCl}_3$ )  $\delta$  8.00 (d,  $J = 6.8$  Hz, 2H), 7.93 (dd,  $J_1 = 8.0$  Hz,  $J_2 = 16.0$  Hz, 2H), 7.61 (d,  $J = 6.8$  Hz, 1H), 7.50-7.40 (m, 4H), 6.50 (s, 1H), 4.62 (d,  $J = 17.2$  Hz, 1H), 3.68 (d,  $J = 17.6$  Hz, 1H) ppm.

$^{13}\text{C NMR}$  (100 MHz,  $\text{CDCl}_3$ )  $\delta$  200.1, 169.9, 153.0, 136.3, 136.1, 134.6, 128.9, 128.6, 126.3, 125.8, 123.8, 123.4 (q,  $J = 283.5$  Hz), 121.9, 77.7 (q,  $J = 29.9$  Hz), 40.2 ppm.

$^{19}\text{F NMR}$  (376.5 MHz,  $\text{CDCl}_3$ )  $\delta$  -79.7 ppm.

HRMS (ESI)  $m/z$ :  $[\text{M}]^+$  calcd for  $\text{C}_{17}\text{H}_{12}\text{F}_3\text{NO}_2\text{S}$  351.0541; found 351.0543.

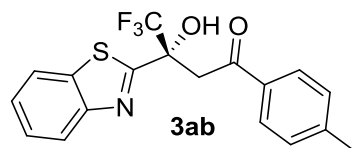

**(S)-3-(Benzo[*d*]thiazol-2-yl)-4,4,4-trifluoro-3-hydroxy-1-(*p*-tolyl)butan-1-one**

**(3ab)** was prepared from trifluoromethyl ketone hydrate **1a** and methyl ketone **2b** (3.0 equiv.) for 24 h according to the above general procedure (eluent: petroleum ether/ethyl acetate = 20:1 to 10:1, v/v). White solid, m.p. 148–150 °C; 28.1 mg, 77% yield.

$[\alpha]_{\text{D}}^{25} = -73.1$  ( $c = 0.26$ ,  $\text{CHCl}_3$ , 86% ee). Enantiomeric excess was determined by chiral HPLC: Daicel Chiralcel AD-H column; 10% *i*-PrOH in hexanes; 1.0 mL/min; 35 °C; retention times: 8.5 min (major), 13.5 min (minor).

$^1\text{H NMR}$  (400 MHz,  $\text{CDCl}_3$ )  $\delta$  7.95 (d,  $J = 7.6$  Hz, 1H), 7.90 (d,  $J = 7.6$  Hz, 3H), 7.45-7.36 (m, 2H), 7.27 (d,  $J = 7.6$  Hz, 2H), 6.62 (s, 1H), 4.56 (d,  $J = 17.2$  Hz, 1H), 3.64 (d,  $J = 16.8$  Hz, 1H), 2.41 (s, 3H) ppm.

$^{13}\text{C NMR}$  (100 MHz,  $\text{CDCl}_3$ )  $\delta$  199.7, 170.1, 153.1, 145.9, 136.2, 133.6, 129.6, 128.8, 126.2, 125.7, 123.7, 123.4 (q,  $J = 283.5$  Hz), 121.9, 77.7 (q,  $J = 29.9$  Hz), 39.9, 21.9 ppm.

$^{19}\text{F NMR}$  (376.5 MHz,  $\text{CDCl}_3$ )  $\delta$  -79.7 ppm.

**HRMS** (ESI)  $m/z$ :  $[\text{M}]^+$  calcd for  $\text{C}_{18}\text{H}_{14}\text{F}_3\text{NO}_2\text{S}$  365.0697; found 365.0698.

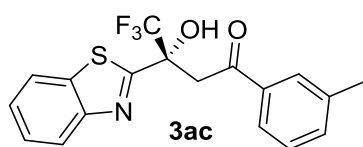

**(S)-3-(Benzo[*d*]thiazol-2-yl)-4,4,4-trifluoro-3-hydroxy-1-(*m*-tolyl)butan-1-one**

**(3ac)** was prepared from trifluoromethyl ketone hydrate **1a** and methyl ketone **2c** (5.0 equiv.) for 36 h according to the above general procedure (eluent: petroleum ether/ethyl acetate = 20:1 to 10:1, v/v). White solid, m.p. 131–133 °C; 30.3 mg, 83% yield.

$[\alpha]_{\text{D}}^{25} = -110.0$  ( $c = 0.28$ ,  $\text{CHCl}_3$ , 89% ee). Enantiomeric excess was determined by chiral HPLC: Daicel Chiralcel AD-H column; 10% *i*-PrOH in hexanes; 1.0 mL/min; 35 °C; retention times: 8.0 min (major), 11.3 min (minor).

$^1\text{H NMR}$  (400 MHz,  $\text{CDCl}_3$ )  $\delta$  7.96 (d,  $J = 8.0$  Hz, 1H), 7.91 (d,  $J = 7.6$  Hz, 1H), 7.80 (s, 2H), 7.47-7.36 (m, 4H), 6.55 (s, 1H), 4.60 (d,  $J = 17.6$  Hz, 1H), 3.67 (d,  $J = 17.2$  Hz, 1H), 2.41 (s, 3H) ppm.



$^{13}\text{C}$  NMR (100 MHz,  $\text{CDCl}_3$ )  $\delta$  200.3, 170.0, 153.0, 138.9, 136.2, 136.0, 135.5, 129.1, 128.8, 126.6, 125.9, 125.8, 123.7, 123.4 (q,  $J = 283.5$  Hz), 121.9, 77.7 (q,  $J = 29.9$  Hz), 40.2, 21.3 ppm.

$^{19}\text{F}$  NMR (376.5 MHz,  $\text{CDCl}_3$ )  $\delta$  -79.6 ppm.

HRMS (ESI)  $m/z$ :  $[\text{M}]^+$  calcd for  $\text{C}_{18}\text{H}_{14}\text{F}_3\text{NO}_2\text{S}$  365.0697; found 365.0695.

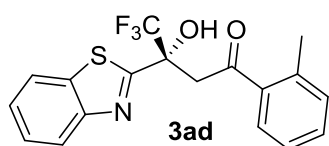

**(S)-3-(Benzo[d]thiazol-2-yl)-4,4,4-trifluoro-3-hydroxy-1-(o-tolyl)butan-1-one**

**(3ad)** was prepared from trifluoromethyl ketone hydrate **1a** and methyl ketone **2d** (5.0 equiv.) for 36 h according to the above general procedure (eluent: petroleum ether/ethyl acetate = 20:1 to 10:1, v/v). White solid, m.p. 96–98 °C; 22.6 mg, 62% yield.

$[\alpha]_{\text{D}}^{25} = -23.3$  ( $c = 0.21$ ,  $\text{CHCl}_3$ , 80% ee). Enantiomeric excess was determined by chiral HPLC: Daicel Chiralcel OD-H column; 3% *i*-PrOH in hexanes; 1.0 mL/min; 35 °C; retention times: 11.4 min (major), 12.0 min (minor).

$^1\text{H}$  NMR (400 MHz,  $\text{CDCl}_3$ )  $\delta$  7.99 (d,  $J = 8.0$  Hz, 1H), 7.93 (d,  $J = 6.8$  Hz, 2H), 7.50–7.41 (m, 3H), 7.35 (t,  $J = 7.6$  Hz, 1H), 7.25 (d,  $J = 7.2$  Hz, 1H), 6.56 (s, 1H), 4.52 (d,  $J = 17.2$  Hz, 1H), 3.60 (d,  $J = 16.8$  Hz, 1H), 2.38 (s, 3H) ppm.

$^{13}\text{C}$  NMR (100 MHz,  $\text{CDCl}_3$ )  $\delta$  204.0, 169.9, 152.9, 139.2, 136.6, 136.3, 132.9, 132.3, 129.6, 126.3, 126.1, 125.8, 123.7, 123.3 (q,  $J = 283.4$  Hz), 122.0, 77.9 (q,  $J = 29.9$  Hz), 42.5, 21.3 ppm.

$^{19}\text{F}$  NMR (376.5 MHz,  $\text{CDCl}_3$ )  $\delta$  -79.7 ppm.

HRMS (ESI) m/z: [M]<sup>+</sup> calcd for C<sub>18</sub>H<sub>14</sub>F<sub>3</sub>NO<sub>2</sub>S 365.0697; found 365.0693.

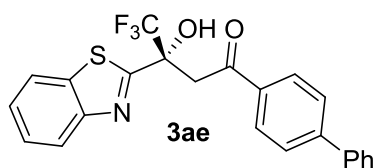

(S)-1-([1,1'-Biphenyl]-4-yl)-3-(benzo[d]thiazol-2-yl)-4,4,4-trifluoro-3-hydroxybutan-1-one (3ae) was prepared from trifluoromethyl ketone hydrate **1a** and methyl ketone **2e** (5.0 equiv.) for 23 h according to the above general procedure with catalyst **A** instead of catalyst **C** (eluent: petroleum ether/ethyl acetate = 20:1 to 15:1, v/v). White solid, m.p. 112–114 °C; 30.3 mg, 71% yield.  $[\alpha]_{\text{D}}^{25} = -103.6$  ( $c = 0.28$ , CHCl<sub>3</sub>, 78% ee). Enantiomeric excess was determined by chiral HPLC: Daicel Chiralcel AD-H column; 10% *i*-PrOH in hexanes; 1.0 mL/min; 35 °C; retention times: 6.9 min (minor), 13.2 min (major).

<sup>1</sup>H NMR (400 MHz, CDCl<sub>3</sub>) δ 8.09 (d,  $J = 8.4$  Hz, 2H), 8.00 (d,  $J = 8.0$  Hz, 1H), 7.93 (d,  $J = 7.6$  Hz, 1H), 7.72 (d,  $J = 8.0$  Hz, 2H), 7.65 (d,  $J = 7.6$  Hz, 2H), 7.53-7.39 (m, 5H), 6.60 (s, 1H), 4.66 (d,  $J = 17.2$  Hz, 1H), 3.73 (d,  $J = 17.2$  Hz, 1H) ppm.

<sup>13</sup>C NMR (100 MHz, CDCl<sub>3</sub>) δ 199.6, 170.0, 153.0, 147.3, 139.4, 136.2, 134.7, 129.3, 129.1, 128.7, 127.5, 127.4, 126.2, 125.8, 123.7, 123.4 (q,  $J = 283.6$  Hz), 121.9, 77.7 (q,  $J = 29.9$  Hz), 40.1 ppm.

<sup>19</sup>F NMR (376.5 MHz, CDCl<sub>3</sub>) δ -79.5 ppm.

HRMS (ESI) m/z: [M]<sup>+</sup> calcd for C<sub>23</sub>H<sub>16</sub>F<sub>3</sub>NO<sub>2</sub>S 427.0854; found 427.0851.

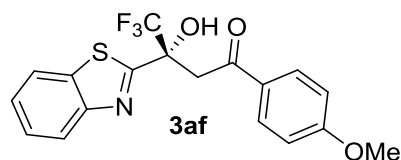

**(S)-3-(Benzo[*d*]thiazol-2-yl)-4,4,4-trifluoro-3-hydroxy-1-(4-methoxyphenyl)butan-1-one (3af)** was prepared from trifluoromethyl ketone hydrate **1a** and methyl ketone **2f** (3.0 equiv.) for 17 h according to the above general procedure (eluent: petroleum ether/ethyl acetate = 15:1 to 10:1, v/v). White solid, m.p. 105–106 °C; 30.1 mg, 79% yield.

$[\alpha]_{\text{D}}^{25} = -119.3$  ( $c = 0.27$ ,  $\text{CHCl}_3$ , 82% ee). Enantiomeric excess was determined by chiral HPLC: Daicel Chiralcel OD-H column; 15% *i*-PrOH in hexanes; 1.0 mL/min; 35 °C; retention times: 9.0 min (minor), 13.1 min (major).

$^1\text{H NMR}$  (400 MHz,  $\text{CDCl}_3$ )  $\delta$  7.97 (t,  $J = 7.6$  Hz, 3H), 7.89 (d,  $J = 8.0$  Hz, 1H), 7.45–7.35 (m, 2H), 6.93 (d,  $J = 8.4$  Hz, 2H), 6.80 (s, 1H), 4.55 (d,  $J = 16.8$  Hz, 1H), 3.84 (s, 3H), 3.62 (d,  $J = 16.8$  Hz, 1H) ppm.

$^{13}\text{C NMR}$  (100 MHz,  $\text{CDCl}_3$ )  $\delta$  198.4, 170.2, 164.8, 153.1, 136.2, 131.1, 129.0, 126.2, 125.7, 123.7, 123.5 (q,  $J = 283.5$  Hz), 121.9, 114.1, 77.7 (q,  $J = 29.8$  Hz), 55.6, 39.4 ppm.

$^{19}\text{F NMR}$  (376.5 MHz,  $\text{CDCl}_3$ )  $\delta$  -79.6 ppm.

**HRMS** (ESI)  $m/z$ :  $[M]^+$  calcd for  $\text{C}_{18}\text{H}_{14}\text{F}_3\text{NO}_3\text{S}$  381.0646; found 381.0643.

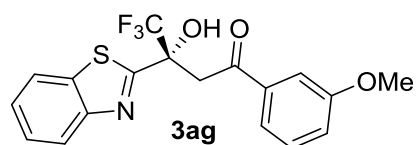

**(S)-3-(Benzo[*d*]thiazol-2-yl)-4,4,4-trifluoro-3-hydroxy-1-(3-methoxyphenyl)butan-1-one (3ag)** was prepared from trifluoromethyl ketone hydrate **1a** and

methyl ketone **2g** (5.0 equiv.) for 17 h according to the above general procedure (eluent: petroleum ether/ethyl acetate = 15:1 to 10:1, v/v). White solid, m.p. 103–105 °C; 31.6 mg, 83% yield.

$[\alpha]_{\text{D}}^{25} = -115.0$  ( $c = 0.30$ ,  $\text{CHCl}_3$ , 88% ee). Enantiomeric excess was determined by chiral HPLC: Daicel Chiralcel OD-H column; 8% *i*-PrOH in hexanes; 1.0 mL/min; 35 °C; retention times: 20.6 min (minor), 21.9 min (major).

$^1\text{H NMR}$  (400 MHz,  $\text{CDCl}_3$ )  $\delta$  7.96 (d,  $J = 7.6$  Hz, 1H), 7.91 (d,  $J = 6.8$  Hz, 1H), 7.62 (d,  $J = 6.4$  Hz, 1H), 7.47 (s, 1H), 7.45–7.38 (m, 3H), 7.17 (d,  $J = 7.2$  Hz, 1H), 6.47 (s, 1H), 4.60 (d,  $J = 17.6$  Hz, 1H), 3.82 (s, 3H), 3.68 (d,  $J = 17.2$  Hz, 1H) ppm.

$^{13}\text{C NMR}$  (100 MHz,  $\text{CDCl}_3$ )  $\delta$  199.8, 169.9, 160.0, 153.0, 137.3, 136.2, 129.9, 126.2, 125.8, 123.7, 123.4 (q,  $J = 283.5$  Hz), 121.9, 121.4, 121.2, 112.5, 77.6 (q,  $J = 29.9$  Hz), 55.5, 40.4 ppm.

$^{19}\text{F NMR}$  (376.5 MHz,  $\text{CDCl}_3$ )  $\delta$  -79.6 ppm.

HRMS (ESI)  $m/z$ :  $[M]^+$  calcd for  $\text{C}_{18}\text{H}_{14}\text{F}_3\text{NO}_3\text{S}$  381.0646; found 381.0644.

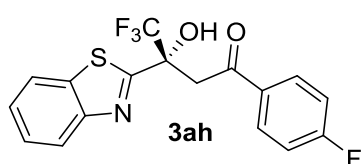

(*S*)-3-(Benzo[*d*]thiazol-2-yl)-4,4,4-trifluoro-1-(4-fluorophenyl)-3-hydroxybutan-1-one (**3ah**) was prepared from trifluoromethyl ketone hydrate **1a** and methyl ketone **2h** (5.0 equiv.) for 24 h according to the above general procedure (eluent: petroleum ether/ethyl acetate = 20:1 to 10:1, v/v). Yellow solid, m.p. 115–116 °C; 34.1 mg, 92% yield.

$[\alpha]_{\text{D}}^{25} = -85.6$  ( $c = 0.32$ ,  $\text{CHCl}_3$ , 86% ee). Enantiomeric excess was determined

by chiral HPLC: Daicel Chiralcel OD-H column; 10% *i*-PrOH in hexanes; 1.0 mL/min; 35 °C; retention times: 6.5 min (minor), 15.8 min (major).

<sup>1</sup>H NMR (400 MHz, CDCl<sub>3</sub>) δ 8.03 (s, *J* = 8.0 Hz, 2H), 7.96 (d, *J* = 7.6 Hz, 1H), 7.90 (d, *J* = 7.2 Hz, 1H), 7.42 (dd, *J*<sub>1</sub> = 7.6 Hz, *J*<sub>2</sub> = 14.4 Hz, 2H), 7.14 (s, 2H), 6.48 (s, 1H), 4.61 (d, *J* = 17.2 Hz, 1H), 3.65 (d, *J* = 17.2 Hz, 1H) ppm.

<sup>13</sup>C NMR (100 MHz, CDCl<sub>3</sub>) δ 198.5, 169.8, 166.7 (d, *J* = 256.0 Hz), 153.0, 136.3, 132.6 (d, *J* = 2.9 Hz), 131.5 (d, *J* = 9.7 Hz), 126.3, 125.9, 123.7, 123.4 (q, *J* = 283.5 Hz), 122.0, 116.2 (d, *J* = 22.0 Hz), 77.7 (q, *J* = 30.0 Hz), 40.1 ppm.

<sup>19</sup>F NMR (376.5 MHz, CDCl<sub>3</sub>) δ -79.7, -102.1 ppm.

HRMS (ESI) *m/z*: [M]<sup>+</sup> calcd for C<sub>17</sub>H<sub>11</sub>F<sub>4</sub>NO<sub>2</sub>S 369.0447; found 369.0447.

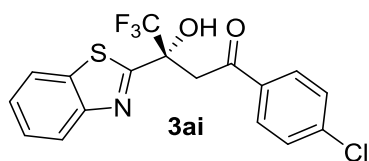

**(S)-3-(Benzo[*d*]thiazol-2-yl)-1-(4-chlorophenyl)-4,4,4-trifluoro-3-hydroxybutan-1-one (3ai)** was prepared from trifluoromethyl ketone hydrate **1a** and methyl ketone **2i** (5.0 equiv.) for 18 h according to the above general procedure (eluent: petroleum ether/ethyl acetate = 20:1 to 10:1, v/v). Yellow solid, m.p. 143–144 °C; 36.0 mg, 94% yield.

[α]<sub>D</sub><sup>25</sup> = -139.7 (*c* = 0.31, CHCl<sub>3</sub>, 86% ee). Enantiomeric excess was determined by chiral HPLC: Daicel Chiralcel AD-H column; 10% *i*-PrOH in hexanes; 1.0 mL/min; 35 °C; retention times: 11.3 min (major), 15.9 min (minor).

<sup>1</sup>H NMR (400 MHz, CDCl<sub>3</sub>) δ 7.92 (t, *J* = 8.4 Hz, 4H), 7.47-7.38 (m, 4H), 6.34 (s, 1H), 4.57 (d, *J* = 17.2 Hz, 1H), 3.62 (d, *J* = 17.2 Hz, 1H) ppm.

$^{13}\text{C}$  NMR (100 MHz,  $\text{CDCl}_3$ )  $\delta$  199.0, 169.6, 152.9, 141.4, 136.3, 134.5, 130.1, 129.4, 126.3, 125.9, 123.8, 123.3 (q,  $J = 283.5$  Hz), 122.0, 77.7 (q,  $J = 30.0$  Hz), 40.2 ppm.

$^{19}\text{F}$  NMR (376.5 MHz,  $\text{CDCl}_3$ )  $\delta$  -79.7 ppm.

HRMS (ESI)  $m/z$ :  $[\text{M}]^+$  calcd for  $\text{C}_{17}\text{H}_{11}\text{ClF}_3\text{NO}_2\text{S}$  385.0151; found 385.0149.

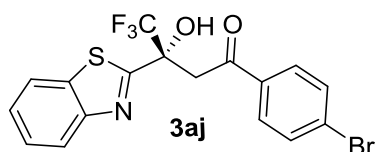

(S)-3-(Benzo[d]thiazol-2-yl)-1-(4-bromophenyl)-4,4,4-trifluoro-3-hydroxybutan-1-one (**3aj**) was prepared from trifluoromethyl ketone hydrate **1a** and methyl ketone **2j** (3.0 equiv.) for 24 h according to the above general procedure (eluent: petroleum ether/ethyl acetate = 20:1 to 10:1). White solid, m.p. 144.5–145.8 °C; 39.5 mg, 92% yield.

$[\alpha]_{\text{D}}^{25} = -144.4$  ( $c = 0.32$ ,  $\text{CHCl}_3$ , 84% ee). Enantiomeric excess was determined by chiral HPLC: Daicel Chiralcel OD-H column; 10% *i*-PrOH in hexanes; 1.0 mL/min; 35 °C; retention times: 10.8 min (major), 15.0 min (minor).

$^1\text{H}$  NMR (400 MHz,  $\text{CDCl}_3$ )  $\delta$  7.95 (t,  $J = 7.2$  Hz, 2H), 7.88 (d,  $J = 8.8$  Hz, 2H), 7.65 (d,  $J = 8.8$  Hz, 2H), 7.50–7.41 (m, 2H), 6.35 (s, 1H), 4.58 (d,  $J = 17.2$  Hz, 1H), 3.63 (d,  $J = 16.8$  Hz, 1H) ppm.

$^{13}\text{C}$  NMR (100 MHz,  $\text{CDCl}_3$ )  $\delta$  199.2, 169.6, 152.9, 136.3, 134.8, 132.3, 130.2, 130.1, 126.3, 125.9, 123.8, 123.3 (q,  $J = 283.4$  Hz), 122.0, 77.7 (q,  $J = 30.1$  Hz), 40.1 ppm.

$^{19}\text{F}$  NMR (376.5 MHz,  $\text{CDCl}_3$ )  $\delta$  -79.7 ppm.

**HRMS** (ESI)  $m/z$ :  $[M]^+$  calcd for  $C_{17}H_{11}BrF_3NO_2S$  428.9646; found 428.9641.

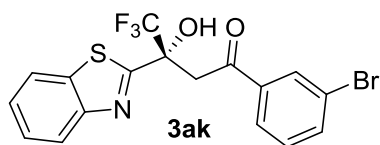

**(S)-3-(Benzo[d]thiazol-2-yl)-1-(3-bromophenyl)-4,4,4-trifluoro-3-hydroxybutan-1-one (3ak)** was prepared from trifluoromethyl ketone hydrate **1a** and methyl ketone **2k** (3.0 equiv.) for 24 h according to the above general procedure (eluent: petroleum ether/ethyl acetate = 20:1 to 10:1). Yellow solid, m.p. 121.5–123.2 °C; 39.8 mg, 93% yield.

$[\alpha]_D^{25} = -69.7$  ( $c = 0.33$ ,  $CHCl_3$ , 89% ee). Enantiomeric excess was determined by chiral HPLC: Daicel Chiralcel AD-H column; 10% *i*-PrOH in hexanes; 1.0 mL/min; 35 °C; retention times: 10.7 min (major), 13.8 min (minor).

**$^1H$  NMR** (400 MHz,  $CDCl_3$ )  $\delta$  8.11 (s, 1H), 7.96 (d,  $J = 7.6$  Hz, 1H), 7.91 (d,  $J = 7.2$  Hz, 2H), 7.72 (d,  $J = 7.2$  Hz, 1H), 7.43 (dd,  $J_1 = 8.0$  Hz,  $J_2 = 12.8$  Hz, 2H), 7.34 (t,  $J = 7.6$  Hz, 1H), 6.25 (s, 1H), 4.59 (d,  $J = 17.2$  Hz, 1H), 3.63 (d,  $J = 17.2$  Hz, 1H) ppm.

**$^{13}C$  NMR** (100 MHz,  $CDCl_3$ )  $\delta$  198.8, 169.4, 152.8, 137.7, 137.4, 136.2, 131.6, 130.5, 127.2, 126.3, 125.9, 123.7, 123.3 (q,  $J = 283.5$  Hz), 123.3, 121.9, 77.7 (q,  $J = 30.1$  Hz), 40.4 ppm.

**$^{19}F$  NMR** (376.5 MHz,  $CDCl_3$ )  $\delta$  -79.6 ppm.

**HRMS** (ESI)  $m/z$ :  $[M]^+$  calcd for  $C_{17}H_{11}BrF_3NO_2S$  428.9646; found 428.9645.

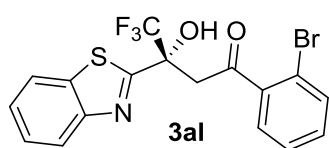

**(S)-3-(Benzo[d]thiazol-2-yl)-1-(2-bromophenyl)-4,4,4-trifluoro-3-hydroxybutan-1-one (3a)** was prepared from trifluoromethyl ketone hydrate **1a** and methyl ketone **2l** (3.0 equiv.) for 17 h according to the above general procedure (eluent: petroleum ether/ethyl acetate = 20:1 to 10:1). White solid, m.p. 78.0–79.5 °C; 39.2 mg, 91% yield.

$[\alpha]_D^{25} = -26.3$  ( $c = 0.35$ ,  $\text{CHCl}_3$ , 79% ee). Enantiomeric excess was determined by chiral HPLC: Daicel Chiralcel AD-H column; 20% *i*-PrOH in hexanes; 1.0 mL/min; 35 °C; retention times: 6.1 min (major), 16.0 min (minor).

$^1\text{H NMR}$  (400 MHz,  $\text{CDCl}_3$ )  $\delta$  7.97 (d,  $J = 8.0$  Hz, 1H), 7.93 (d,  $J = 7.6$  Hz, 1H), 7.60 (t,  $J = 9.6$  Hz, 2H), 7.49 (t,  $J = 7.6$  Hz, 1H), 7.44 (d,  $J = 7.6$  Hz, 1H), 7.41–7.31 (m, 2H), 6.11 (s, 1H), 4.46 (d,  $J = 17.2$  Hz, 1H), 3.70 (d,  $J = 17.2$  Hz, 1H) ppm.

$^{13}\text{C NMR}$  (100 MHz,  $\text{CDCl}_3$ )  $\delta$  203.4, 169.2, 152.7, 139.7, 136.3, 134.3, 133.0, 129.8, 127.6, 126.4, 126.0, 123.7, 123.2 (q,  $J = 283.7$  Hz), 122.0, 119.3, 77.9 (q,  $J = 30.2$  Hz), 44.2 ppm.

$^{19}\text{F NMR}$  (376.5 MHz,  $\text{CDCl}_3$ )  $\delta$  -79.6 ppm.

**HRMS** (ESI)  $m/z$ :  $[\text{M}]^+$  calcd for  $\text{C}_{17}\text{H}_{11}\text{BrF}_3\text{NO}_2\text{S}$  428.9646; found 428.9640.

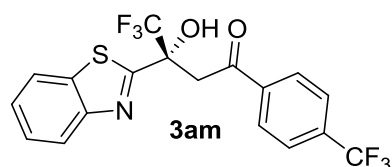

**(S)-3-(Benzo[d]thiazol-2-yl)-4,4,4-trifluoro-3-hydroxy-1-(4-(trifluoromethyl)phenyl)butan-1-one (3am)** was prepared from trifluoromethyl ketone hydrate **1a** and methyl ketone **2m** (3.0 equiv.) for 23 h according to the above general



procedure (eluent: petroleum ether/ethyl acetate = 15:1 to 10:1, v/v). White solid, m.p. 99–101 °C; 39.6 mg, 95% yield.

$[\alpha]_{\text{D}}^{25} = -112.9$  ( $c = 0.35$ ,  $\text{CHCl}_3$ , 87% ee). Enantiomeric excess was determined by chiral HPLC: Daicel Chiralcel OD-H column; 15% *i*-PrOH in hexanes; 1.0 mL/min; 35 °C; retention times: 5.7 min (minor), 12.4 min (major).

$^1\text{H NMR}$  (400 MHz,  $\text{CDCl}_3$ )  $\delta$  8.10 (d,  $J = 8.0$  Hz, 2H), 7.93 (dd,  $J_1 = 8.0$  Hz,  $J_2 = 13.2$  Hz, 2H), 7.76 (d,  $J = 8.0$  Hz, 2H), 7.47–7.39 (m, 2H), 6.22 (s, 1H), 4.66 (d,  $J = 17.2$  Hz, 1H), 3.70 (d,  $J = 17.2$  Hz, 1H) ppm.

$^{13}\text{C NMR}$  (100 MHz,  $\text{CDCl}_3$ )  $\delta$  199.2, 169.4, 152.8, 138.7, 136.3, 135.6 (q,  $J = 32.7$  Hz), 129.0, 126.4, 126.0 (q,  $J = 3.5$  Hz), 123.7, 123.5 (q,  $J = 271.2$  Hz), 123.3 (q,  $J = 283.5$  Hz), 122.1, 122.0, 77.7 (q,  $J = 30.1$  Hz), 40.7 ppm.

$^{19}\text{F NMR}$  (376.5 MHz,  $\text{CDCl}_3$ )  $\delta$  -63.3, -79.7 ppm.

**HRMS** (ESI)  $m/z$ :  $[\text{M}]^+$  calcd for  $\text{C}_{18}\text{H}_{11}\text{F}_6\text{NO}_2\text{S}$  419.0415; found 419.0415.

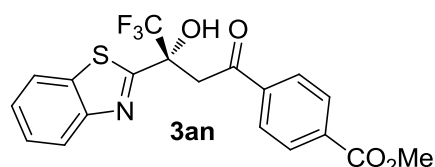

**(S)-Methyl-4-(3-(benzo[*d*]thiazol-2-yl)-4,4,4-trifluoro-3-hydroxybutanoyl)benzoate (3an)** was prepared from trifluoromethyl ketone hydrate **1a** and methyl ketone **2n** (3.0 equiv.) for 24 h according to the above general procedure (eluent: petroleum ether/ethyl acetate = 10:1 to 5:1, v/v). Yellow solid, m.p. 135–136 °C; 38.4 mg, 94% yield.

$[\alpha]_{\text{D}}^{25} = -129.7$  ( $c = 0.35$ ,  $\text{CHCl}_3$ , 89% ee). Enantiomeric excess was determined

by chiral HPLC: Daicel Chiralcel AD-H column; 20% *i*-PrOH in hexanes; 1.0 mL/min; 35 °C; retention times: 8.7 min (major), 11.2 min (minor).

<sup>1</sup>H NMR (400 MHz, CDCl<sub>3</sub>) δ 8.14 (d, *J* = 8.4 Hz, 2H), 8.04 (d, *J* = 8.4 Hz, 2H), 7.91 (d, *J* = 8.0 Hz, 2H), 7.45-7.37 (m, 2H), 6.22 (s, 1H), 4.61 (d, *J* = 17.2 Hz, 1H), 3.96 (s, 3H), 3.66 (d, *J* = 17.2 Hz, 1H) ppm.

<sup>13</sup>C NMR (100 MHz, CDCl<sub>3</sub>) δ 199.7, 169.5, 166.0, 152.8, 139.2, 136.2, 135.2, 130.1, 128.6, 126.3, 125.9, 123.7, 123.3 (q, *J* = 283.2 Hz), 122.0, 77.7 (q, *J* = 30.0 Hz), 52.7, 40.7 ppm.

<sup>19</sup>F NMR (376.5 MHz, CDCl<sub>3</sub>) δ -79.7 ppm.

HRMS (ESI) *m/z*: [M]<sup>+</sup> calcd for C<sub>19</sub>H<sub>14</sub>F<sub>3</sub>NO<sub>4</sub>S 409.0596; found 409.0594.

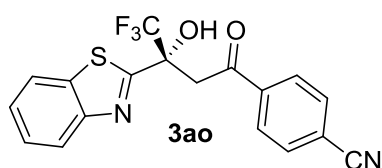

(*S*)-4-(3-(Benzo[*d*]thiazol-2-yl)-4,4,4-trifluoro-3-hydroxybutanoyl)benzonitrile (**3ao**) was prepared from trifluoromethyl ketone hydrate **1a** and methyl ketone **2o** (3.0 equiv.) for 23 h according to the above general procedure (eluent: petroleum ether/ethyl acetate = 10:1 to 5:1, v/v). White solid, m.p. 154–155 °C; 36.1 mg, 96% yield.

[α]<sub>D</sub><sup>25</sup> = -167.6 (*c* = 0.33, CHCl<sub>3</sub>, 86% ee). Enantiomeric excess was determined by chiral HPLC: Daicel Chiralcel AD-H column; 20% *i*-PrOH in hexanes; 1.0 mL/min; 35 °C; retention times: 10.6 min (major), 16.5 min (minor).

<sup>1</sup>H NMR (400 MHz, CDCl<sub>3</sub>) δ 8.08 (d, *J* = 8.0 Hz, 2H), 7.91 (dd, *J*<sub>1</sub> = 4.8 Hz, *J*<sub>2</sub> =

6.4 Hz, 2H), 7.79 (d,  $J = 8.0$  Hz, 2H), 7.47-7.39 (m, 2H), 6.04 (s, 1H), 4.60 (d,  $J = 17.2$  Hz, 1H), 3.65 (d,  $J = 17.2$  Hz, 1H) ppm.

$^{13}\text{C}$  NMR (100 MHz,  $\text{CDCl}_3$ )  $\delta$  198.8, 169.0, 152.6, 138.9, 136.2, 132.7, 129.0, 126.4, 126.0, 123.7, 123.2 (q,  $J = 283.6$  Hz), 122.0, 121.8, 117.7, 77.7 (q,  $J = 30.2$  Hz), 40.7 ppm.

$^{19}\text{F}$  NMR (376.5 MHz,  $\text{CDCl}_3$ )  $\delta$  -79.7 ppm.

HRMS (ESI)  $m/z$ :  $[\text{M}]^+$  calcd for  $\text{C}_{18}\text{H}_{11}\text{F}_3\text{N}_2\text{O}_2\text{S}$  376.0493; found 376.0496.

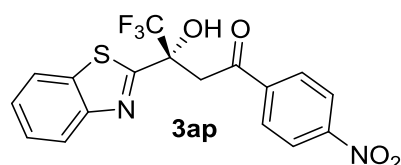

**(S)-3-(Benzo[*d*]thiazol-2-yl)-4,4,4-trifluoro-3-hydroxy-1-(4-nitrophenyl)butan-1-one (3ap)** was prepared from trifluoromethyl ketone hydrate **1a** and methyl ketone **2p** (3.0 equiv.) for 11 h according to the above general procedure (eluent: petroleum ether/ethyl acetate = 10:1 to 5:1, v/v). Yellow solid, m.p. 142–144 °C; 37.8 mg, 95% yield.

$[\alpha]_{\text{D}}^{25} = -130.8$  ( $c = 0.36$ ,  $\text{CHCl}_3$ , 85% ee). Enantiomeric excess was determined by chiral HPLC: Daicel Chiralcel AD-H column; 20% *i*-PrOH in hexanes; 1.0 mL/min; 35 °C; retention times: 11.4 min (major), 15.2 min (minor).

$^1\text{H}$  NMR (400 MHz,  $\text{CDCl}_3$ )  $\delta$  8.33 (d,  $J = 8.4$  Hz, 2H), 8.16 (d,  $J = 8.4$  Hz, 2H), 7.91 (t,  $J = 7.2$  Hz, 2H), 7.47-7.39 (m, 2H), 6.00 (s, 1H), 4.64 (d,  $J = 17.2$  Hz, 1H), 3.68 (d,  $J = 17.2$  Hz, 1H) ppm.

$^{13}\text{C}$  NMR (100 MHz,  $\text{CDCl}_3$ )  $\delta$  198.7, 169.0, 152.6, 151.1, 140.4, 136.2, 129.7,

126.5, 126.1, 124.1, 123.7, 123.2 (q,  $J = 283.5$  Hz), 122.0, 77.7 (q,  $J = 30.2$  Hz), 41.0 ppm.

$^{19}\text{F}$  NMR (376.5 MHz,  $\text{CDCl}_3$ )  $\delta$  -79.7 ppm.

HRMS (ESI)  $m/z$ :  $[\text{M}]^+$  calcd for  $\text{C}_{17}\text{H}_{11}\text{F}_3\text{N}_2\text{O}_4\text{S}$  396.0392; found 396.0389.

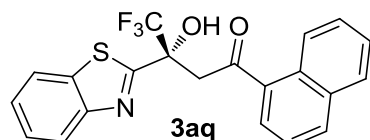

**(S)-3-(Benzo[*d*]thiazol-2-yl)-4,4,4-trifluoro-3-hydroxy-1-(naphthalen-1-yl)butan-1-one (3aq)** was prepared from trifluoromethyl ketone hydrate **1a** and methyl ketone **2q** (5.0 equiv.) for 24 h according to the above general procedure (eluent: petroleum ether/ethyl acetate = 20:1 to 10:1, v/v). Yellow solid, m.p. 110–112 °C; 34.1 mg, 85% yield.

$[\alpha]_{\text{D}}^{25} = -5.0$  ( $c = 0.24$ ,  $\text{CHCl}_3$ , 70% ee). Enantiomeric excess was determined by chiral HPLC: Daicel Chiralcel OD-H column; 8% *i*-PrOH in hexanes; 1.0 mL/min; 35 °C; retention times: 16.1 min (major), 22.6 min (minor).

$^1\text{H}$  NMR (400 MHz,  $\text{CDCl}_3$ )  $\delta$  8.45 (dd,  $J_1 = 3.6$  Hz,  $J_2 = 6.0$  Hz, 1H), 8.20 (d,  $J = 7.2$  Hz, 1H), 8.05 (d,  $J = 8.0$  Hz, 1H), 7.94 (d,  $J = 8.0$  Hz, 2H), 7.87 (d,  $J = 4.0$  Hz, 1H), 7.59–7.51 (m, 3H), 7.47–7.39 (m, 2H), 6.63 (s, 1H), 4.66 (d,  $J = 17.2$  Hz, 1H), 3.75 (d,  $J = 16.8$  Hz, 1H) ppm.

$^{13}\text{C}$  NMR (100 MHz,  $\text{CDCl}_3$ )  $\delta$  204.0, 169.8, 152.9, 136.3, 134.5, 134.4, 134.0, 130.0, 129.7, 128.7, 128.6, 126.9, 126.3, 125.9, 125.5, 124.4, 123.7, 123.4 (q,  $J = 283.5$  Hz), 122.0, 78.1 (q,  $J = 30.0$  Hz), 43.1 ppm.

$^{19}\text{F}$  NMR (376.5 MHz,  $\text{CDCl}_3$ )  $\delta$  -79.6 ppm.

HRMS (ESI) m/z: [M]<sup>+</sup> calcd for C<sub>21</sub>H<sub>14</sub>F<sub>3</sub>NO<sub>2</sub>S 401.0697; found 401.0701.

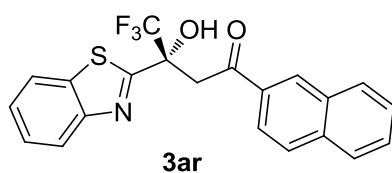

**(S)-3-(Benzo[*d*]thiazol-2-yl)-4,4,4-trifluoro-3-hydroxy-1-(naphthalen-2-yl)butan-1-one (3ar)** was prepared from trifluoromethyl ketone hydrate **1a** and methyl ketone **2r** (3.0 equiv.) for 17 h according to the above general procedure (eluent: petroleum ether/ethyl acetate = 20:1 to 10:1, v/v). White solid, m.p. 142–144 °C; 37.6 mg, 94% yield.

[ $\alpha$ ]<sub>D</sub><sup>25</sup> = -190.6 (*c* = 0.31, CHCl<sub>3</sub>, 88% ee). Enantiomeric excess was determined by chiral HPLC: Daicel Chiralcel AD-H column; 10% *i*-PrOH in hexanes; 1.0 mL/min; 35 °C; retention times: 12.9 min (major), 20.5 min (minor).

<sup>1</sup>H NMR (400 MHz, CDCl<sub>3</sub>)  $\delta$  8.58 (s, 1H), 8.00–7.86 (m, 6H), 7.64–7.57 (m, 2H), 7.44–7.37 (m, 2H), 6.62 (s, 1H), 4.76 (d, *J* = 17.2 Hz, 1H), 3.79 (d, *J* = 16.8 Hz, 1H) ppm.

<sup>13</sup>C NMR (100 MHz, CDCl<sub>3</sub>)  $\delta$  200.0, 170.0, 153.0, 136.3, 136.2, 133.3, 132.4, 131.3, 130.0, 129.4, 128.9, 127.9, 127.3, 126.3, 125.8, 123.7, 123.5 (q, *J* = 283.5 Hz), 123.4, 121.9, 77.8 (q, *J* = 29.9 Hz), 40.1 ppm.

<sup>19</sup>F NMR (376.5 MHz, CDCl<sub>3</sub>)  $\delta$  -79.6 ppm.

HRMS (ESI) m/z: [M]<sup>+</sup> calcd for C<sub>21</sub>H<sub>14</sub>F<sub>3</sub>NO<sub>2</sub>S 401.0697; found 401.0696.

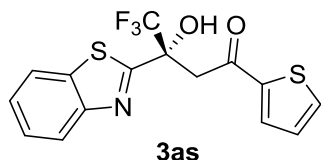

**(S)-3-(Benzo[*d*]thiazol-2-yl)-4,4,4-trifluoro-3-hydroxy-1-(thiophen-2-yl)butan-1-one (3as)** was prepared from trifluoromethyl ketone hydrate **1a** and methyl ketone **2s** (3.0 equiv.) for 24 h according to the above general procedure (eluent: petroleum ether/ethyl acetate = 15:1 to 10:1, v/v). Yellow solid, m.p. 150–152 °C; 34.3 mg, 96% yield.

$[\alpha]_D^{25} = -74.4$  ( $c = 0.25$ ,  $\text{CHCl}_3$ , 79% ee). Enantiomeric excess was determined by chiral HPLC: Daicel Chiralcel OD-H column; 8% *i*-PrOH in hexanes; 1.0 mL/min; 35 °C; retention times: 11.7 min (minor), 13.3 min (major).

$^1\text{H NMR}$  (400 MHz,  $\text{CDCl}_3$ )  $\delta$  7.94 (dd,  $J_1 = 8.0$  Hz,  $J_2 = 20.0$  Hz, 3H), 7.73 (d,  $J = 3.6$  Hz, 1H), 7.48–7.38(m, 2H), 7.17 (s, 1H), 6.49 (s, 1H), 4.42 (d,  $J = 16.8$  Hz, 1H), 3.66 (d,  $J = 16.8$  Hz, 1H) ppm.

$^{13}\text{C NMR}$  (100 MHz,  $\text{CDCl}_3$ )  $\delta$  192.1, 169.6, 153.0, 142.8, 136.3, 136.2, 134.5, 128.7, 126.3, 125.8, 123.8, 123.3 (q,  $J = 283.5$  Hz), 122.0, 77.6 (q,  $J = 30.0$  Hz), 40.6 ppm.

$^{19}\text{F NMR}$  (376.5 MHz,  $\text{CDCl}_3$ )  $\delta$  -79.7 ppm.

**HRMS** (ESI)  $m/z$ :  $[M]^+$  calcd for  $\text{C}_{15}\text{H}_{10}\text{F}_3\text{NO}_2\text{S}_2$  357.0105; found 357.0108.

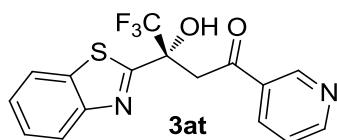

**(S)-3-(Benzo[*d*]thiazol-2-yl)-4,4,4-trifluoro-3-hydroxy-1-(pyridin-3-yl)butan-**

**1-one (3at)** was prepared from trifluoromethyl ketone hydrate **1a** and methyl ketone **2t** (3.0 equiv.) for 24 h according to the above general procedure (eluent: petroleum ether/ethyl acetate = 15:1 to 10:1, v/v). White solid, m.p. 145–146 °C; 30.5 mg, 87% yield.

$[\alpha]_{\text{D}}^{25} = -3.1$  ( $c = 0.26$ ,  $\text{CHCl}_3$ , 80% ee). Enantiomeric excess was determined by chiral HPLC: Daicel Chiralcel OD-H column; 20% *i*-PrOH in hexanes; 1.0 mL/min; 35 °C; retention times: 7.1 min (minor), 11.4 min (major).

$^1\text{H NMR}$  (400 MHz,  $\text{CDCl}_3$ )  $\delta$  8.71 (d,  $J = 4.0$  Hz, 1H), 8.49 (br s, 1H), 8.02 (d,  $J = 8.0$  Hz, 2H), 7.88 (d,  $J = 7.2$  Hz, 2H), 7.56 (t,  $J = 6.4$  Hz, 1H), 7.46 (t,  $J = 7.6$  Hz, 1H), 7.39 (t,  $J = 7.6$  Hz, 1H), 4.28 (d,  $J = 15.2$  Hz, 1H), 4.04 (d,  $J = 15.6$  Hz, 1H) ppm.

$^{13}\text{C NMR}$  (100 MHz,  $\text{CDCl}_3$ )  $\delta$  197.0, 170.0, 153.4, 152.1, 148.4, 138.3, 135.9, 128.2, 126.2, 125.7, 123.9, 123.9 (q,  $J = 284.6$  Hz), 123.2, 121.8, 76.6 (q,  $J = 29.9$  Hz), 44.9 ppm.

$^{19}\text{F NMR}$  (376.5 MHz,  $\text{CDCl}_3$ )  $\delta$  -78.9 ppm.

**HRMS** (ESI)  $m/z$ :  $[\text{M}]^+$  calcd for  $\text{C}_{16}\text{H}_{11}\text{F}_3\text{N}_2\text{O}_2\text{S}$  352.0493; found 352.0495.

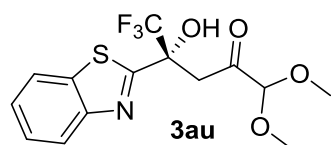

**(S)-4-(Benzo[*d*]thiazol-2-yl)-5,5,5-trifluoro-4-hydroxy-1,1-dimethoxypentan-2-one (3au)** was prepared from trifluoromethyl ketone hydrate **1a** and methyl ketone **2u** (3.0 equiv.) for 24 h according to the above general procedure (eluent: petroleum ether/ethyl acetate = 10:1 to 5:1, v/v). Colorless oil, 31.9 mg,

91% yield.

$[\alpha]_{\text{D}}^{25} = -17.8$  ( $c = 0.27$ ,  $\text{CHCl}_3$ , 67% ee). Enantiomeric excess was determined by chiral HPLC: Daicel Chiralcel OD-H column; 15% *i*-PrOH in hexanes; 1.0 mL/min; 35 °C; retention times: 5.4 min (minor), 6.0 min (major).

$^1\text{H NMR}$  (400 MHz,  $\text{CDCl}_3$ )  $\delta$  8.01 (d,  $J = 8.0$  Hz, 1H), 7.91 (d,  $J = 8.0$  Hz, 1H), 7.48 (t,  $J = 7.6$  Hz, 1H), 7.41 (t,  $J = 7.6$  Hz, 1H), 5.62 (s, 1H), 4.52 (s, 1H), 4.11 (d,  $J = 18.0$  Hz, 1H), 3.41 (s, 3H), 3.39 (s, 3H), 3.39 (d,  $J = 18.0$  Hz, 1H) ppm.

$^{13}\text{C NMR}$  (100 MHz,  $\text{CDCl}_3$ )  $\delta$  205.3, 169.0, 152.7, 136.2, 126.4, 126.0, 123.7, 123.2 (q,  $J = 283.5$  Hz), 121.9, 77.2 (q,  $J = 30.3$  Hz), 103.7, 55.1, 54.8, 40.5 ppm.

$^{19}\text{F NMR}$  (376.5 MHz,  $\text{CDCl}_3$ )  $\delta$  -79.9 ppm.

**HRMS** (ESI)  $m/z$ :  $[\text{M}]^+$  calcd for  $\text{C}_{14}\text{H}_{14}\text{F}_3\text{NO}_4\text{S}$  349.0596; found 349.0595.

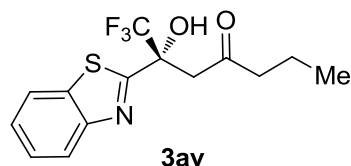

**(S)-2-(Benzo[*d*]thiazol-2-yl)-1,1,1-trifluoro-2-hydroxyheptan-4-one (3av)** was prepared from trifluoromethyl ketone hydrate **1a** and methyl ketone **2v** (3.0 equiv.) for 24 h according to the above general procedure (eluent: petroleum ether/ethyl acetate = 20:1 to 10:1). Colorless oil, 8.9 mg, 28% yield.

$[\alpha]_{\text{D}}^{28} = -17.4$  ( $c = 0.61$ ,  $\text{CHCl}_3$ , 61% ee). Enantiomeric excess was determined by chiral HPLC: Daicel Chiralcel OD-H column; 5% *i*-PrOH in hexanes; 1.0 mL/min; 35 °C; retention times: 7.8 min (major), 16.7 min (minor).

$^1\text{H NMR}$  (400 MHz,  $\text{CDCl}_3$ )  $\delta$  8.01 (d,  $J = 8.4$  Hz, 1H), 7.92 (d,  $J = 7.6$  Hz, 1H),



7.50 (t,  $J = 7.6$  Hz, 1H), 7.43 (t,  $J = 7.6$  Hz, 1H), 6.24 (s, 1H), 3.91 (d,  $J = 16.8$  Hz, 1H), 3.15 (d,  $J = 16.8$  Hz, 1H), 2.60-2.50 (m, 2H), 1.63-1.53 (m, 2H), 0.86 (t,  $J = 7.6$  Hz, 3H) ppm.

$^{13}\text{C}$  NMR (100 MHz,  $\text{CDCl}_3$ )  $\delta$  212.2, 169.7, 152.9, 136.3, 126.4, 125.9, 123.7, 123.2 (q,  $J = 283.4$  Hz), 122.0, 77.5 (q,  $J = 30.3$  Hz), 46.5, 43.6, 16.8, 13.6 ppm.

$^{19}\text{F}$  NMR (376.5 MHz,  $\text{CDCl}_3$ )  $\delta$  -80.0 ppm.

HRMS (ESI)  $m/z$ :  $[\text{M}]^+$  calcd for  $\text{C}_{14}\text{H}_{14}\text{F}_3\text{NO}_2\text{S}$  317.0697; found 317.0695.

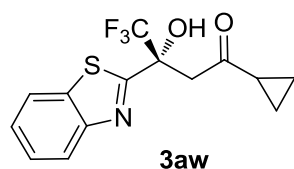

**(S)-3-(Benzo[*d*]thiazol-2-yl)-1-cyclopropyl-4,4,4-trifluoro-3-hydroxybutan-1-one (3aw)** was prepared from trifluoromethyl ketone hydrate **1a** and methyl ketone **2w** (3.0 equiv.) for 36 h according to the above general procedure (eluent: petroleum ether/ethyl acetate = 20:1 to 10:1). Colorless oil, 5.4 mg, 17% yield.

$[\alpha]_{\text{D}}^{28} = -12.3$  ( $c = 0.53$ ,  $\text{CHCl}_3$ , 68% ee). Enantiomeric excess was determined by chiral HPLC: Daicel Chiralcel OD-H column; 5% *i*-PrOH in hexanes; 1.0 mL/min; 35 °C; retention times: 8.0 min (major), 24.2 min (minor).

$^1\text{H}$  NMR (400 MHz,  $\text{CDCl}_3$ )  $\delta$  8.04 (d,  $J = 8.4$  Hz, 1H), 7.91 (d,  $J = 8.0$  Hz, 1H), 7.49 (t,  $J = 8.4$  Hz, 1H), 7.41 (t,  $J = 8.4$  Hz, 1H), 6.42 (s, 1H), 4.02 (d,  $J = 17.2$  Hz, 1H), 3.34 (d,  $J = 17.2$  Hz, 1H), 2.07-2.01 (m, 1H), 1.19-1.13 (m, 1H), 1.02-0.96 (m, 3H) ppm.

$^{13}\text{C}$  NMR (100 MHz,  $\text{CDCl}_3$ )  $\delta$  211.4, 169.9, 153.0, 136.2, 126.3, 125.8, 123.6, 123.3 (q,  $J = 283.4$  Hz), 121.9, 77.3 (q,  $J = 30.3$  Hz), 43.7, 22.6, 12.3, 12.1 ppm.

$^{19}\text{F}$  NMR (376.5 MHz,  $\text{CDCl}_3$ )  $\delta$  -79.9 ppm.

HRMS (ESI)  $m/z$ :  $[\text{M}]^+$  calcd for  $\text{C}_{14}\text{H}_{12}\text{F}_3\text{NO}_4\text{S}$  315.0541; found 315.0545.

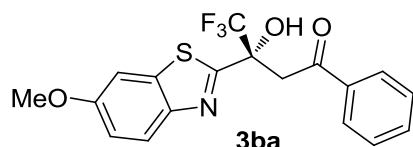

**(S)-4,4,4-Trifluoro-3-hydroxy-3-(6-methoxybenzo[*d*]thiazol-2-yl)-1-phenylbutan-1-one (3ba)** was prepared from trifluoromethyl ketone hydrate **1b** and methyl ketone **2a** (5.0 equiv.) for 16 h according to the above general procedure (eluent: petroleum ether/ethyl acetate = 20:1 to 10:1, v/v). White solid, m.p. 113–115 °C; 30.1 mg, 79% yield.

$[\alpha]_{\text{D}}^{25} = -90.0$  ( $c = 0.25$ ,  $\text{CHCl}_3$ , 78% ee). Enantiomeric excess was determined by chiral HPLC: Daicel Chiralcel OD-H column; 10% *i*-PrOH in hexanes; 1.0 mL/min; 35 °C; retention times: 9.7 min (major), 12.5 min (minor).

$^1\text{H}$  NMR (400 MHz,  $\text{CDCl}_3$ )  $\delta$  7.99 (d,  $J = 7.2$  Hz, 2H), 7.80 (d,  $J = 8.8$  Hz, 1H), 7.62 (t,  $J = 7.2$  Hz, 1H), 7.48 (t,  $J = 7.2$  Hz, 2H), 7.33 (s, 1H), 7.03 (d,  $J = 8.8$  Hz, 1H), 6.44 (s, 1H), 4.56 (d,  $J = 17.2$  Hz, 1H), 3.84 (s, 3H), 3.63 (d,  $J = 17.2$  Hz, 1H) ppm.

$^{13}\text{C}$  NMR (100 MHz,  $\text{CDCl}_3$ )  $\delta$  200.2, 169.9, 158.1, 147.5, 137.7, 136.1, 134.6, 128.9, 128.6, 124.2, 123.4 (q,  $J = 283.5$  Hz), 116.1, 103.9, 77.6 (q,  $J = 29.9$  Hz), 55.9, 40.0 ppm.

$^{19}\text{F}$  NMR (376.5 MHz,  $\text{CDCl}_3$ )  $\delta$  -79.8 ppm.

HRMS (ESI)  $m/z$ :  $[M]^+$  calcd for  $C_{18}H_{14}F_3NO_3S$  381.0646; found 381.0643.

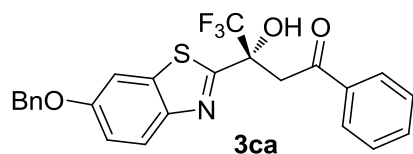

**(S)-3-(6-(Benzyloxy)benzo[*d*]thiazol-2-yl)-4,4,4-trifluoro-3-hydroxy-1-phenylbutan-1-one (3ca)** was prepared from trifluoromethyl ketone hydrate **1c** and methyl ketone **2a** (3.0 equiv.) for 20 h according to the above general procedure (eluent: petroleum ether/ethyl acetate = 15:1 to 10:1, v/v). Yellow solid, m.p. 111–112 °C; 36.8 mg, 80% yield.

$[\alpha]_D^{25} = -130.0$  ( $c = 0.33$ ,  $CHCl_3$ , 87% ee). Enantiomeric excess was determined by chiral HPLC: Daicel Chiralcel OD-H column; 10% *i*-PrOH in hexanes; 1.0 mL/min; 35 °C; retention times: 19.9 min (major), 23.0 min (minor).

$^1H$  NMR (400 MHz,  $CDCl_3$ )  $\delta$  8.01 (d,  $J = 8.0$  Hz, 2H), 7.83 (d,  $J = 8.8$  Hz, 1H), 7.64 (t,  $J = 7.6$  Hz, 1H), 7.51 (d,  $J = 7.6$  Hz, 2H), 7.48–7.34 (m, 6H), 7.13 (d,  $J = 9.2$  Hz, 1H), 6.46 (s, 1H), 5.12 (s, 2H), 4.58 (d,  $J = 17.2$  Hz, 1H), 3.64 (d,  $J = 17.2$  Hz, 1H) ppm.

$^{13}C$  NMR (100 MHz,  $CDCl_3$ )  $\delta$  200.2, 167.1, 157.2, 147.7, 137.6, 136.5, 136.0, 134.6, 128.9, 128.8, 128.6, 128.2, 127.5, 124.3, 123.4 (q,  $J = 283.4$  Hz), 116.6, 105.3, 77.6 (q,  $J = 29.9$  Hz), 70.7, 40.1 ppm.

$^{19}F$  NMR (376.5 MHz,  $CDCl_3$ )  $\delta$  -79.8 ppm.

HRMS (ESI)  $m/z$ :  $[M]^+$  calcd for  $C_{24}H_{18}F_3NO_3S$  457.0959; found 457.0961.

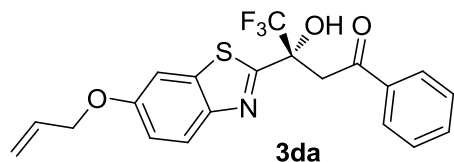

**(S)-3-(6-(Allyloxy)benzo[*d*]thiazol-2-yl)-4,4,4-trifluoro-3-hydroxy-1-phenylbutan-1-one (3da)** was prepared from trifluoromethyl ketone hydrate **1d** and methyl ketone **2a** (5.0 equiv.) for 24 h according to the above general procedure (eluent: petroleum ether/ethyl acetate = 15:1 to 10:1, v/v). Yellow solid, m.p. 105–107 °C; 37.4 mg, 92% yield.

$[\alpha]_D^{25} = -210.9$  ( $c = 0.32$ ,  $\text{CHCl}_3$ , 86% ee). Enantiomeric excess was determined by chiral HPLC: Daicel Chiralcel OD-H column; 10% *i*-PrOH in hexanes; 1.0 mL/min; 35 °C; retention times: 8.3 min (major), 10.8 min (minor).

$^1\text{H NMR}$  (400 MHz,  $\text{CDCl}_3$ )  $\delta$  7.99 (d,  $J = 7.6$  Hz, 2H), 7.80 (d,  $J = 8.8$  Hz, 1H), 7.62 (t,  $J = 7.2$  Hz, 1H), 7.48 (t,  $J = 7.2$  Hz, 2H), 7.35 (s, 1H), 7.07 (d,  $J = 9.2$  Hz, 1H), 6.44 (s, 1H), 6.09–6.03 (m, 1H), 5.43 (d,  $J = 17.2$  Hz, 1H), 5.32 (d,  $J = 10.4$  Hz, 1H), 4.58 (s, 2H), 4.56 (d,  $J = 17.2$  Hz, 1H), 3.63 (d,  $J = 17.2$  Hz, 1H) ppm.

$^{13}\text{C NMR}$  (100 MHz,  $\text{CDCl}_3$ )  $\delta$  200.2, 167.0, 157.1, 147.6, 137.6, 136.1, 134.6, 132.9, 128.9, 128.6, 124.2, 123.4 (q,  $J = 283.4$  Hz), 118.1, 116.5, 105.1, 77.4 (q,  $J = 29.9$  Hz), 69.5, 40.0 ppm.

$^{19}\text{F NMR}$  (376.5 MHz,  $\text{CDCl}_3$ )  $\delta$  -79.8 ppm.

**HRMS** (ESI)  $m/z$ :  $[\text{M}]^+$  calcd for  $\text{C}_{20}\text{H}_{16}\text{F}_3\text{NO}_3\text{S}$  407.0803; found 407.0801.

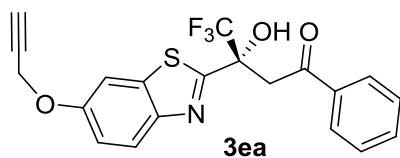

(S)-4,4,4-Trifluoro-3-hydroxy-1-phenyl-3-(6-(prop-2-yn-1-yloxy)benzo[d]thiazol-2-yl)butan-1-one (**3ea**) was prepared from trifluoromethyl ketone hydrate **1e** and methyl ketone **2a** (3.0 equiv.) for 24 h according to the above general procedure (eluent: petroleum ether/ethyl acetate = 15:1 to 10:1, v/v). Yellow solid, m.p. 88–89 °C; 35.8 mg, 88% yield.

$[\alpha]_{\text{D}}^{25} = -145.1$  ( $c = 0.33$ ,  $\text{CHCl}_3$ , 86% ee). Enantiomeric excess was determined by chiral HPLC: Daicel Chiralcel OD-H column; 10% *i*-PrOH in hexanes; 1.0 mL/min; 35 °C; retention times: 16.5 min (major), 19.5 min (minor).

$^1\text{H NMR}$  (400 MHz,  $\text{CDCl}_3$ )  $\delta$  7.99 (d,  $J = 7.2$  Hz, 2H), 7.82 (d,  $J = 8.8$  Hz, 1H), 7.63 (t,  $J = 6.8$  Hz, 1H), 7.48 (t,  $J = 9.2$  Hz, 3H), 7.10 (d,  $J = 8.8$  Hz, 1H), 6.43 (s, 1H), 4.75 (s, 2H), 4.56 (d,  $J = 17.2$  Hz, 1H), 3.63 (d,  $J = 17.2$  Hz, 1H), 2.55 (s, 1H) ppm.

$^{13}\text{C NMR}$  (100 MHz,  $\text{CDCl}_3$ )  $\delta$  200.2, 167.6, 155.9, 148.1, 137.5, 136.0, 134.7, 128.9, 128.6, 124.3, 123.4 (q,  $J = 283.4$  Hz), 116.6, 105.6, 78.2, 77.6 (q,  $J = 29.9$  Hz), 76.2, 56.4, 40.1 ppm.

$^{19}\text{F NMR}$  (376.5 MHz,  $\text{CDCl}_3$ )  $\delta$  -79.8 ppm.

HRMS (ESI)  $m/z$ :  $[\text{M}]^+$  calcd for  $\text{C}_{20}\text{H}_{14}\text{F}_3\text{NO}_3\text{S}$  405.0646; found 405.0642.

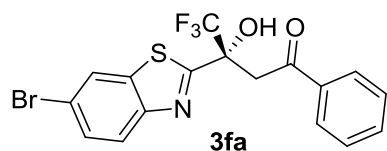

(S)-3-(6-Bromobenzo[d]thiazol-2-yl)-4,4,4-trifluoro-3-hydroxy-1-phenylbutan-1-one (**3fa**) was prepared from trifluoromethyl ketone hydrate **1f** and methyl ketone **2a** (5.0 equiv.) for 24 h according to the above general

**S28**

procedure (eluent: petroleum ether/ethyl acetate = 20:1 to 10:1, v/v). White solid, m.p. 91–93 °C; 33.7 mg, 79% yield.

$[\alpha]_{\text{D}}^{25} = -90.6$  ( $c = 0.31$ ,  $\text{CHCl}_3$ , 82% ee). Enantiomeric excess was determined by chiral HPLC: Daicel Chiralcel OD-H column; 8% *i*-PrOH in hexanes; 1.0 mL/min; 35 °C; retention times: 8.3 min (major), 14.9 min (minor).

$^1\text{H NMR}$  (400 MHz,  $\text{CDCl}_3$ )  $\delta$  8.03 (s, 1H), 7.99 (d,  $J = 7.2$  Hz, 2H), 7.77 (d,  $J = 4.8$  Hz, 1H), 7.63 (t,  $J = 7.2$  Hz, 1H), 7.50 (q,  $J = 8.0$  Hz, 3H), 6.45 (s, 1H), 4.55 (d,  $J = 17.2$  Hz, 1H), 3.66 (d,  $J = 17.2$  Hz, 1H) ppm.

$^{13}\text{C NMR}$  (100 MHz,  $\text{CDCl}_3$ )  $\delta$  200.0, 170.6, 151.9, 137.9, 135.9, 134.8, 129.8, 129.0, 128.7, 124.9, 124.5, 123.2 (q,  $J = 283.5$  Hz), 119.6, 77.6 (q,  $J = 30.0$  Hz), 40.1 ppm.

$^{19}\text{F NMR}$  (376.5 MHz,  $\text{CDCl}_3$ )  $\delta$  -79.7 ppm.

**HRMS** (ESI)  $m/z$ :  $[\text{M}]^+$  calcd for  $\text{C}_{17}\text{H}_{11}\text{BrF}_3\text{NO}_2\text{S}$  428.9646; found 428.9644.

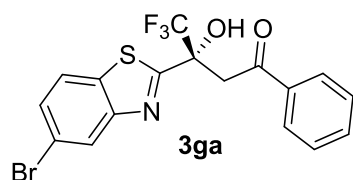

**(S)-3-(5-Bromobenzo[*d*]thiazol-2-yl)-4,4,4-trifluoro-3-hydroxy-1-phenylbutan-1-one (3ga)** was prepared from trifluoromethyl ketone hydrate **1g** and methyl ketone **2a** (5.0 equiv.) for 24 h according to the above general procedure (eluent: petroleum ether/ethyl acetate = 20:1 to 10:1, v/v). White solid, m.p. 54–56 °C; 34.0 mg, 79% yield.

$[\alpha]_{\text{D}}^{25} = -30.0$  ( $c = 0.30$ ,  $\text{CHCl}_3$ , 86% ee). Enantiomeric excess was determined by chiral HPLC: Daicel Chiralcel OD-H column; 8% *i*-PrOH in hexanes; 1.0

mL/min; 35 °C; retention times: 11.2 min (major), 14.1 min (minor).

<sup>1</sup>H NMR (400 MHz, CDCl<sub>3</sub>) δ 8.07 (s, 1H), 7.98 (d, *J* = 5.6 Hz, 2H), 7.74 (t, *J* = 7.2 Hz, 1H), 7.62 (q, *J* = 6.0 Hz, 1H), 7.51-7.46 (m, 3H), 6.47 (s, 1H), 4.58 (d, *J* = 17.2 Hz, 1H), 3.64 (d, *J* = 17.2 Hz, 1H) ppm.

<sup>13</sup>C NMR (100 MHz, CDCl<sub>3</sub>) δ 200.1, 171.9, 154.1, 135.9, 135.0, 134.8, 129.0, 128.9, 128.6, 126.6, 123.2 (q, *J* = 283.5 Hz), 123.0, 119.9, 77.7 (q, *J* = 30.1 Hz), 40.1 ppm.

<sup>19</sup>F NMR (376.5 MHz, CDCl<sub>3</sub>) δ -79.6 ppm.

HRMS (ESI) *m/z*: [M]<sup>+</sup> calcd for C<sub>17</sub>H<sub>11</sub>BrF<sub>3</sub>NO<sub>2</sub>S 428.9646; found 428.9642.

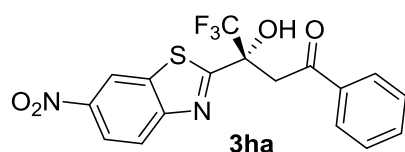

**(S)-4,4,4-Trifluoro-3-hydroxy-3-(6-nitrobenzo[*d*]thiazol-2-yl)-1-phenylbutan-1-one (3ha)** was prepared from trifluoromethyl ketone hydrate **1h** and methyl ketone **2a** (5.0 equiv.) for 16 h according to the above general procedure (eluent: petroleum ether/ethyl acetate = 10:1 to 5:1, v/v). Yellow solid, m.p. 168–170 °C; 24.6 mg, 62% yield.

[α]<sub>D</sub><sup>25</sup> = -73.2 (*c* = 0.25, CHCl<sub>3</sub>, 70% ee). Enantiomeric excess was determined by chiral HPLC: Daicel Chiralcel OD-H column; 20% *i*-PrOH in hexanes; 1.0 mL/min; 35 °C; retention times: 9.2 min (major), 18.7 min (minor).

<sup>1</sup>H NMR (400 MHz, CDCl<sub>3</sub>) δ 8.85 (s, 1H), 8.31 (d, *J* = 9.2 Hz, 1H), 8.00 (t, *J*<sub>1</sub> = 10.0 Hz, 3H), 7.66 (t, *J* = 7.2 Hz, 1H), 7.51 (t, *J* = 7.6 Hz, 2H), 6.47 (s, 1H), 4.58 (d, *J* = 17.6 Hz, 1H), 3.71 (d, *J* = 17.2 Hz, 1H) ppm.

$^{13}\text{C}$  NMR (100 MHz,  $\text{CDCl}_3$ )  $\delta$  199.9, 176.4, 156.5, 145.5, 136.6, 135.7, 135.0, 129.1, 128.7, 124.2, 123.0 (q,  $J = 283.7$  Hz), 121.7, 118.6, 77.9 (q,  $J = 30.2$  Hz), 40.2 ppm.

$^{19}\text{F}$  NMR (376.5 MHz,  $\text{CDCl}_3$ )  $\delta$  -79.5 ppm.

HRMS (ESI)  $m/z$ :  $[\text{M}]^+$  calcd for  $\text{C}_{17}\text{H}_{11}\text{F}_3\text{N}_2\text{O}_4\text{S}$  396.0392; found 396.0388.

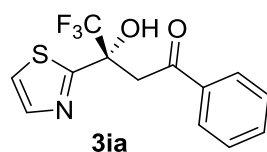

**(S)-4,4,4-Trifluoro-3-hydroxy-1-phenyl-3-(thiazol-2-yl)butan-1-one (3ia)** was prepared from trifluoromethyl ketone hydrate **1i** and methyl ketone **2a** (3.0 equiv.) for 24 h according to the above general procedure (eluent: petroleum ether/ethyl acetate = 15:1 to 10:1, v/v). Yellow solid, m.p. 86–88 °C; 29.4 mg, 98% yield.

$[\alpha]_{\text{D}}^{25} = -109.6$  ( $c = 0.25$ ,  $\text{CHCl}_3$ , 91% ee). Enantiomeric excess was determined by chiral HPLC: Daicel Chiralcel OD-H column; 8% *i*-PrOH in hexanes; 1.0 mL/min; 35 °C; retention times: 11.0 min (minor), 16.2 min (major).

$^1\text{H}$  NMR (400 MHz,  $\text{CDCl}_3$ )  $\delta$  7.98 (d,  $J = 8.0$  Hz, 2H), 7.71 (d,  $J = 2.8$  Hz, 1H), 7.63 (t,  $J = 7.6$  Hz, 1H), 7.49 (t,  $J = 7.6$  Hz, 2H), 7.42 (d,  $J = 2.8$  Hz, 1H), 6.39 (s, 1H), 4.48 (d,  $J = 17.2$  Hz, 1H), 3.56 (d,  $J = 17.2$  Hz, 1H) ppm.

$^{13}\text{C}$  NMR (100 MHz,  $\text{CDCl}_3$ )  $\delta$  200.4, 168.9, 142.9, 136.1, 134.7, 129.0, 128.6, 123.3 (q,  $J = 283.1$  Hz), 122.0, 77.4 (q,  $J = 30.1$  Hz), 39.9 ppm.

$^{19}\text{F}$  NMR (376.5 MHz,  $\text{CDCl}_3$ )  $\delta$  -80.4 ppm.

HRMS (ESI)  $m/z$ :  $[\text{M}]^+$  calcd for  $\text{C}_{13}\text{H}_{10}\text{F}_3\text{NO}_2\text{S}$  301.0384; found 301.0387.



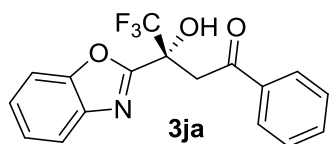

**(R)-3-(Benzo[d]oxazol-2-yl)-4,4,4-trifluoro-3-hydroxy-1-phenylbutan-1-one**

**(3ja)** was prepared from trifluoromethyl ketone hydrate **1j** and methyl ketone **2a** (3.0 equiv.) for 24 h according to the above general procedure (eluent: petroleum ether/ethyl acetate = 15:1 to 10:1, v/v). Yellow solid, m.p. 101–103 °C; 27.4 mg, 82% yield.

$[\alpha]_{D}^{25} = -38.4$  ( $c = 0.25$ ,  $\text{CHCl}_3$ , 48% ee). Enantiomeric excess was determined by chiral HPLC: Daicel Chiralcel OD-H column; 10% *i*-PrOH in hexanes; 1.0 mL/min; 35 °C; retention times: 6.9 min (major), 9.3 min (minor).

$^1\text{H NMR}$  (400 MHz,  $\text{CDCl}_3$ )  $\delta$  7.97 (d,  $J = 7.6$  Hz, 2H), 7.72 (d,  $J = 7.2$  Hz, 1H), 7.63 (t,  $J = 7.2$  Hz, 1H), 7.58 (d,  $J = 8.0$  Hz, 1H), 7.50 (t,  $J = 7.6$  Hz, 2H), 7.40–7.33 (m, 2H), 5.59 (s, 1H), 4.32 (d,  $J = 17.2$  Hz, 1H), 3.79 (d,  $J = 17.6$  Hz, 1H) ppm.

$^{13}\text{C NMR}$  (100 MHz,  $\text{CDCl}_3$ )  $\delta$  197.7, 161.5, 151.5, 140.5, 136.0, 134.6, 129.0, 128.5, 126.1, 125.0, 123.4 (q,  $J = 284.0$  Hz), 120.8, 111.4, 74.6 (q,  $J = 30.6$  Hz), 40.3 ppm.

$^{19}\text{F NMR}$  (376.5 MHz,  $\text{CDCl}_3$ )  $\delta$  -79.6 ppm.

**HRMS** (ESI)  $m/z$ :  $[M]^+$  calcd for  $\text{C}_{17}\text{H}_{12}\text{F}_3\text{NO}_3$  335.0769; found 335.0767.

#### IV. Gram-Scale Catalytic Reaction and Product Transformations

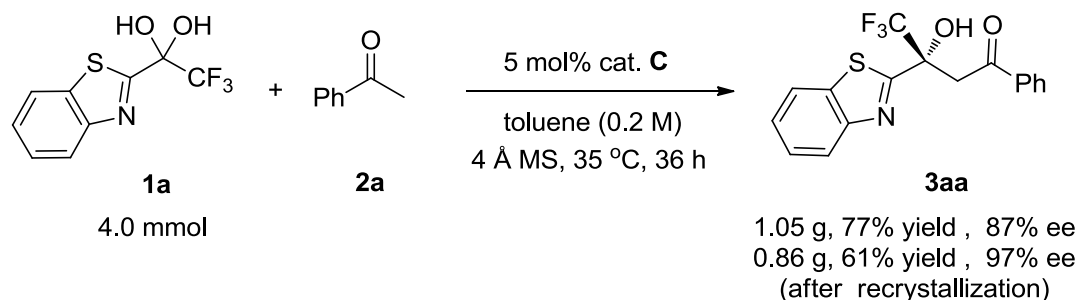

To a 50 mL round-bottom flask equipped with a magnetic stir bar, trifluoromethyl ketone hydrate **1a** (1.00 g, 4.0 mmol), catalyst **C** (5 mol%), 4 Å MS (1.20 g), and toluene (20 mL) were sequentially added. The mixture was stirred for 30 min at 35 °C in an oil bath, and then acetophenone **2a** (1.44 g, 12.0 mmol) was added. After stirring for 36 h, the reaction mixture was concentrated under reduced pressure. The residue was purified by silica gel column chromatography to afford the desired trifluoromethyl tertiary alcohol **3aa** as a white solid (1.18 g, 84% yield, 87% ee). The product with excellent enantioselectivity (0.86 g, 61% yield, 97% ee) was obtained by a simple recrystallization from petroleum ether/CH<sub>2</sub>Cl<sub>2</sub> = 5:1.

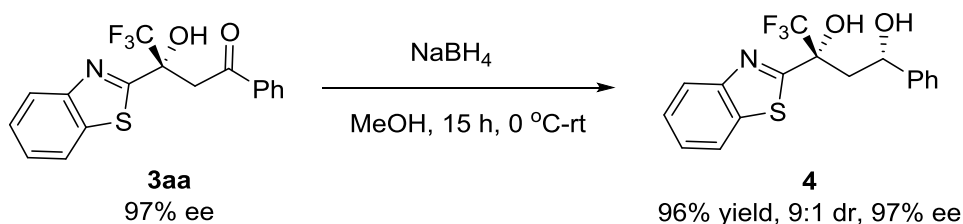

#### (1*S*,3*S*)-3-(Benzo[*d*]thiazol-2-yl)-4,4,4-trifluoro-1-phenylbutane-1,3-diol (**4**).

To a solution of **3aa** (70.2 mg, 0.20 mmol, 97% ee) in anhydrous MeOH (5 mL) at 0 °C in an ice bath was added NaBH<sub>4</sub> (15.1 mg, 0.40 mmol) in portions. Then mixture was spontaneously warmed to room temperature and stirred for 15 h. Upon completion, the reaction was quenched with water (5 mL) at 0

°C in an ice bath, and the mixture was extracted with CH<sub>2</sub>Cl<sub>2</sub> (3 x 10 mL). The organic layers were combined, dried over anhydrous Na<sub>2</sub>SO<sub>4</sub>, filtered, and concentrated under reduced pressure. The residue was purified by silica gel column chromatography (petroleum ether/ethyl acetate = 10:1 to 5:1, v/v) to afford the desired diol **4** (68.0 mg, 96% yield, 97% ee, 9:1 dr). White solid, m.p. 108–110 °C.

[α]<sub>D</sub><sup>25</sup> = -36.3 (*c* = 0.32, CHCl<sub>3</sub>, 97% ee); Enantiomeric excess was determined by chiral HPLC: Daicel Chiralcel OD-H column; 10% *i*-PrOH in hexanes; 1.0 mL/min; 35 °C; retention times: 13.1 min (major), 22.1 min (minor).

<sup>1</sup>H NMR (400 MHz, *d*<sub>6</sub>-acetone) δ 8.07 (d, *J* = 8.0 Hz, 1H), 7.99 (d, *J*<sub>1</sub> = 8.0 Hz, 1H), 7.52 (t, *J* = 7.2 Hz, 1H), 7.45 (t, *J* = 8.0 Hz, 3H), 7.33 (t, *J* = 7.6 Hz, 2H), 7.24 (t, *J* = 7.6 Hz, 2H), 5.57 (t, *J* = 1.6 Hz, 1H), 5.42 (d, *J* = 10.8 Hz, 1H), 2.79 (d, *J* = 14.8 Hz, 1H), 2.65–2.58 (m, 1H) ppm.

<sup>13</sup>C NMR (100 MHz, *d*<sub>6</sub>-acetone) δ 172.2, 154.2, 144.9, 136.2, 129.1, 128.3, 126.8, 126.3, 126.1, 124.0, 125.8 (q, *J* = 285.5 Hz), 122.7, 78.8 (q, *J* = 28.7 Hz), 71.6, 43.9 ppm.

<sup>19</sup>F NMR (376.5 MHz, *d*<sub>6</sub>-acetone) δ -77.1 ppm.

HRMS (ESI) *m/z*: [M]<sup>+</sup> calcd for C<sub>17</sub>H<sub>14</sub>F<sub>3</sub>NO<sub>2</sub>S 354.0776; found 354.0772.

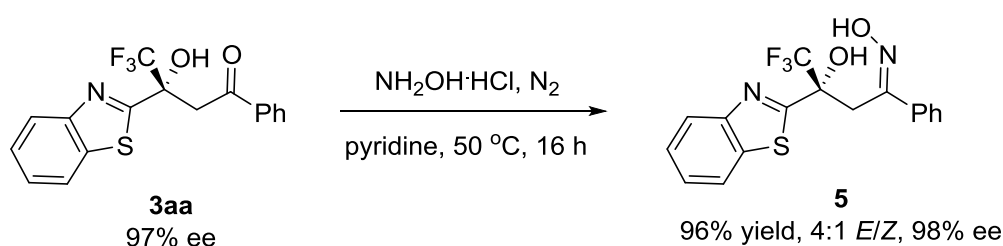

**(*S,E*)-3-(Benzo[*d*]thiazol-2-yl)-4,4,4-trifluoro-3-hydroxy-1-phenylbutan-1-one oxime (5).** To a solution of **3aa** (0.53 g, 1.50 mmol, 97% ee) in pyridine (5.0 mL) at room temperature was added hydroxylamine hydrochloride (260 mg, 3.75 mmol). Under N<sub>2</sub>, the reaction mixture was heated to 50 °C in an oil bath and stirred for 16 h. Upon completion, the mixture was concentrated in vacuo for

the removal of pyridine. The resulting residue was dissolved in CH<sub>2</sub>Cl<sub>2</sub> (50 mL), and washed with water (2 x 30 mL) and brine (30 mL), sequentially. The organic layer was dried over anhydrous Na<sub>2</sub>SO<sub>4</sub>, filtered, and concentrated under reduced pressure. The residue was purified by silica gel column chromatography (petroleum ether/ethyl acetate = 5:1 to 3:1, v/v) to afford the desired oxime **5** (0.53 g, 97% yield). White solid, m.p. 142–144 °C.

<sup>1</sup>H NMR (400 MHz, CDCl<sub>3</sub>) δ 11.08 (s, 1H), 7.89 (d, *J* = 8.0 Hz, 1H), 7.77 (d, *J* = 7.6 Hz, 1H), 7.48-7.31 (m, 4H), 7.07 (s, 3H), 6.26 (s, 1H), 4.19 (d, *J* = 13.6 Hz, 1H), 3.90 (d, *J* = 13.2 Hz, 1H) ppm.

<sup>13</sup>C NMR (100 MHz, CDCl<sub>3</sub>) δ 170.0, 156.1, 152.9, 135.1, 134.3, 129.8, 128.2, 126.8, 126.3, 125.7, 123.2, 124.7 (q, *J* = 233.8 Hz), 121.6, 78.2 (q, *J* = 29.8 Hz), 33.2 ppm.

<sup>19</sup>F NMR (376.5 MHz, CDCl<sub>3</sub>) δ -79.3 ppm.

HRMS (ESI) *m/z*: [M]<sup>+</sup> calcd for C<sub>17</sub>H<sub>13</sub>F<sub>3</sub>N<sub>2</sub>O<sub>2</sub>S 366.0650; found 366.0651.

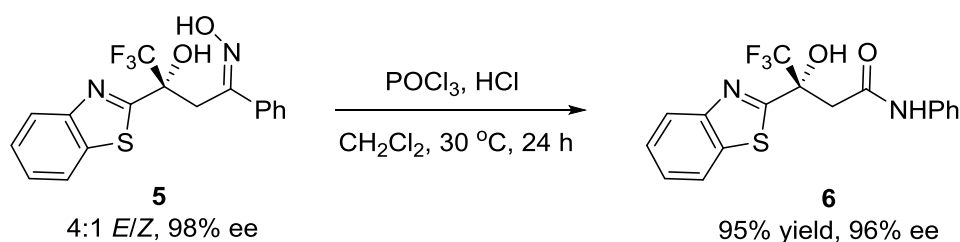

**(S)-3-(Benzo[*d*]thiazol-2-yl)-4,4,4-trifluoro-3-hydroxy-*N*-phenylbutanamide**

**(6).** Under N<sub>2</sub>, to a solution of oxime **5** (73.2 mg, 0.20 mmol, 98% ee) in CH<sub>2</sub>Cl<sub>2</sub> (5.0 mL) at room temperature was added POCl<sub>3</sub> (0.5 mL) and *conc.* HCl (0.5 mL). The reaction mixture was stirred for 24 h. Upon completion, the reaction was quenched with water (5 mL) at 0 °C in an ice bath. The organic layer was

separated, and the aqueous layer was extracted with CH<sub>2</sub>Cl<sub>2</sub> (2 x 15 mL). The organic layers were combined, dried over anhydrous Na<sub>2</sub>SO<sub>4</sub>, and concentrated under reduced pressure. The residue was purified by silica gel column chromatography (petroleum ether/ethyl acetate = 15:1 to 10:1, v/v) to afford the desired amide **6** (69.7 mg, 95% yield, 96% ee). White solid, m.p. 153–155 °C.

$[\alpha]_{D^{25}} = +18.7$  ( $c = 0.30$ , CHCl<sub>3</sub>, 96% ee); Enantiomeric excess was determined by chiral HPLC: Daicel CHIRALCEL OD-H column; 10% *i*-PrOH in hexanes; 1.0 mL/min; 35 °C; retention times: 9.3 min (major), 14.8 min (minor).

<sup>1</sup>H NMR (400 MHz, CDCl<sub>3</sub>) δ 8.24 (s, 1H), 8.00 (d,  $J = 8.0$  Hz, 1H), 7.92 (d,  $J = 8.0$  Hz, 1H), 7.49-7.40 (m, 2H), 7.37 (s, 1H), 7.30 (d,  $J = 8.0$  Hz, 2H), 7.22 (t,  $J = 8.0$  Hz, 2H), 7.09 (t,  $J = 7.2$  Hz, 1H), 3.64 (d,  $J = 14.8$  Hz, 1H), 3.31 (d,  $J = 15.2$  Hz, 1H) ppm.

<sup>13</sup>C NMR (100 MHz, CDCl<sub>3</sub>) δ 170.2, 168.7, 152.9, 136.4, 136.1, 129.1, 126.5, 126.0, 125.5, 123.4, 123.2 (q,  $J = 283.8$  Hz), 121.1, 120.7, 77.1 (q,  $J = 30.1$  Hz), 38.9 ppm.

<sup>19</sup>F NMR (376.5 MHz, CDCl<sub>3</sub>) δ -79.7 ppm.

HRMS (ESI)  $m/z$ :  $[M]^+$  calcd for C<sub>17</sub>H<sub>13</sub>F<sub>3</sub>N<sub>2</sub>O<sub>2</sub>S 366.0650; found 366.0656.

## V. X-ray Crystallographic Analysis of Product 3aa

In a 4 mL vial, 30 mg of **3aa** (97% ee, from the gram-scale preparation) was completely dissolved in DCM (1.0 mL), then 5.0 mL of petroleum ether was added slowly. The vial was placed on a stable experimental table. After several days, the crystal was obtained by slow evaporation of the solvents at room temperature. A suitable single crystal was selected for X-ray diffraction on a Bruker D8 Advance X-Ray diffractometer, Eos fitted with Mo K $\alpha$  radiation ( $\lambda = 0.71073 \text{ \AA}$ ). Data collection and unit cell refinement were executed by using CrysAlisPro software. Using Olex2, the structure was solved with the ShelXT structure solution program using Intrinsic Phasing and refined with the ShelXL refinement package using Least Squares minimisation. The absolute configuration was established by anomalous dispersion effects in diffraction measurements on the crystal. The thermal ellipsoids are shown at 50% probability level.

The absolute stereochemistry of product **3aa** was determined by X-ray diffraction. The X-ray data of **3aa** have been deposited at the Cambridge Crystallographic Data Center (CCDC 2235492). The stereochemistry of other products was assumed by analogy.

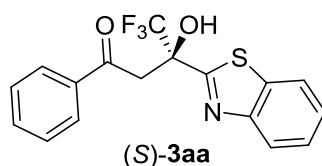

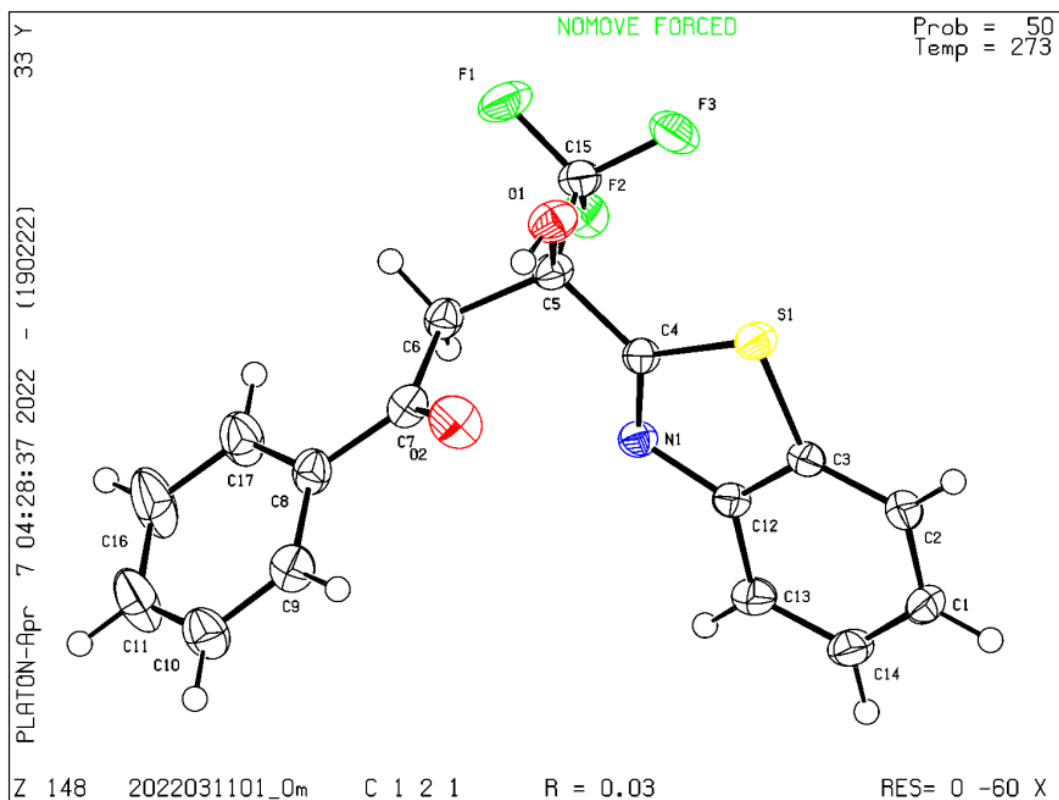

**Figure S1.** ORTEP representation of (*S*)-**3aa** (The thermal ellipsoids are shown at 50% probability level.)

**Table 1.** Crystal data and structure refinement for **3aa**.

|                          |                        |
|--------------------------|------------------------|
| Identification code      | <b>3aa</b>             |
| Empirical formula        | $C_{17}H_{12}F_3NO_2S$ |
| Formula weight           | 351.34                 |
| Temperature              | 273.15 K               |
| Wavelength/ $\text{\AA}$ | 0.71073                |
| Crystal system           | Monoclinic             |
| Space group              | C 121                  |
| $a/\text{\AA}$           | 25.755(3)              |

|                                   |                                                   |
|-----------------------------------|---------------------------------------------------|
| b/Å                               | 6.9641(8)                                         |
| c/Å                               | 8.7584(10)                                        |
| $\alpha$ /°                       | 90                                                |
| $\beta$ /°                        | 94.153                                            |
| $\gamma$ /°                       | 90°                                               |
| Volume/Å <sup>3</sup>             | 1566.8(3)                                         |
| Z                                 | 4                                                 |
| Density (calculated)              | 1.489 g/cm <sup>3</sup>                           |
| Absorption coefficient            | 0.249 mm <sup>-1</sup>                            |
| F(000)                            | 720                                               |
| Crystal size                      | 0.35 x 0.26 x 0.23 mm <sup>3</sup>                |
| Theta range for data collection/° | 2.331 to 28.338                                   |
| Index ranges                      | -33<=h<=34, -9<=k<=9, -11<=l<=11                  |
| Reflections collected             | 10899                                             |
| Independent reflections           | 3882 [R(int) = 0.0345]                            |
| Completeness to theta = 25.242    | 99.8 %                                            |
| Absorption correction             | None                                              |
| Refinement method                 | Full-matrix least-squares on F <sup>2</sup>       |
| Data / restraints / parameters    | 3882/1/221                                        |
| Goodness-of-fit on F <sup>2</sup> | 1.077                                             |
| Final R indices [I>2sigma(I)]     | R <sub>1</sub> = 0.0275, wR <sub>2</sub> = 0.0699 |
| R indices (all data)              | R <sub>1</sub> = 0.0279, wR <sub>2</sub> = 0.0702 |



|                                                |                  |
|------------------------------------------------|------------------|
| Absolute structure parameter                   | 0.04(2)          |
| Extinction coefficient                         | n/a              |
| Largest diff. peak and hole/ e Å <sup>-3</sup> | 0.233 and -0.223 |

**Table 2. Atomic coordinates (x10<sup>4</sup>) and equivalent isotropic displacement parameters (Å<sup>2</sup>x10<sup>3</sup>) for 2022031101\_0m. U(eq) is defined as one third of the trace of the orthogonalized U<sup>ij</sup> tensor.**

| Atom | x       | y        | z        | U(eq) |
|------|---------|----------|----------|-------|
| S(1) | 3319(1) | 8471(1)  | 8182(1)  | 28(1) |
| F(1) | 3340(1) | 2821(2)  | 11073(1) | 43(1) |
| F(2) | 2979(1) | 2781(2)  | 8780(1)  | 32(1) |
| F(3) | 2858(1) | 5179(2)  | 10258(1) | 39(1) |
| O(1) | 3886(1) | 6058(2)  | 10499(1) | 31(1) |
| O(2) | 4674(1) | 5882(2)  | 8485(2)  | 39(1) |
| N(1) | 3516(1) | 5538(2)  | 6482(2)  | 23(1) |
| C(1) | 2959(1) | 10134(3) | 3801(2)  | 32(1) |
| C(2) | 3012(1) | 10298(3) | 5378(2)  | 30(1) |
| C(3) | 3204(1) | 8721(3)  | 6212(2)  | 23(1) |
| C(4) | 3524(1) | 6121(2)  | 7881(2)  | 22(1) |
| C(5) | 3694(1) | 4894(3)  | 9262(2)  | 24(1) |
| C(6) | 4077(1) | 3343(3)  | 8840(2)  | 26(1) |

|       |         |         |         |       |
|-------|---------|---------|---------|-------|
| C(7)  | 4579(1) | 4181(3) | 8333(2) | 27(1) |
| C(8)  | 4950(1) | 2854(3) | 7645(2) | 28(1) |
| C(9)  | 5348(1) | 3627(3) | 6834(2) | 32(1) |
| C(10) | 5691(1) | 2441(3) | 6132(3) | 38(1) |
| C(11) | 5645(1) | 480(4)  | 6280(4) | 52(1) |
| C(12) | 3336(1) | 6999(2) | 5494(2) | 22(1) |
| C(13) | 3285(1) | 6871(3) | 3898(2) | 28(1) |
| C(14) | 3098(1) | 8443(4) | 3070(2) | 32(1) |
| C(15) | 3211(1) | 3909(3) | 9851(2) | 28(1) |
| C(16) | 5262(1) | -309(3) | 7123(4) | 60(1) |
| C(17) | 4909(1) | 875(3)  | 7789(3) | 42(1) |

**Table 3. Bond lengths and angles for 3aa.**

| <b>Atom-Atom</b> | <b>Length/ Å</b> |
|------------------|------------------|
| S(1)-C(3)        | 1.7387(17)       |
| S(1)-C(4)        | 1.7452(17)       |
| F(1)-C(15)       | 1.334(2)         |
| F(2)-C(15)       | 1.332(2)         |
| F(3)-C(15)       | 1.336(2)         |
| O(1)-C(5)        | 1.414(2)         |
| O(1)-H(1)        | 0.80(3)          |

|             |          |
|-------------|----------|
| O(2)-C(7)   | 1.215(2) |
| N(1)-C(4)   | 1.290(2) |
| N(1)-C(12)  | 1.393(2) |
| C(1)-H(1A)  | 0.9300   |
| C(1)-C(2)   | 1.382(3) |
| C(1)-C(14)  | 1.400(3) |
| C(2)-H(2)   | 0.9300   |
| C(2)-C(3)   | 1.390(2) |
| C(3)-C(12)  | 1.407(2) |
| C(4)-C(5)   | 1.519(2) |
| C(5)-C(6)   | 1.527(2) |
| C(5)-C(15)  | 1.540(2) |
| C(6)-H(6A)  | 0.9700   |
| C(6)-H(6B)  | 0.9700   |
| C(6)-C(7)   | 1.515(2) |
| C(7)-C(8)   | 1.488(3) |
| C(8)-C(9)   | 1.396(3) |
| C(8)-C(17)  | 1.389(3) |
| C(9)-H(9)   | 0.9300   |
| C(9)-C(10)  | 1.385(3) |
| C(10)-H(10) | 0.9300   |
| C(10)-C(11) | 1.377(4) |

|             |          |
|-------------|----------|
| C(11)-H(11) | 0.9300   |
| C(11)-C(16) | 1.389(4) |
| C(12)-C(13) | 1.398(2) |
| C(13)-H(13) | 0.9300   |
| C(13)-C(14) | 1.380(3) |
| C(14)-H(14) | 0.9300   |
| C(16)-H(16) | 0.9300   |
| C(16)-C(17) | 1.387(3) |
| C(17)-H(17) | 0.9300   |

---

| <b>Atom-Atom-Atom</b> | <b>Length/Å</b> |
|-----------------------|-----------------|
|-----------------------|-----------------|

---

|                  |            |
|------------------|------------|
| C(3)-S(1)-C(4)   | 88.59(8)   |
| C(5)-O(1)-H(1)   | 107(2)     |
| C(4)-N(1)-C(12)  | 109.98(14) |
| C(2)-C(1)-H(1A)  | 119.4      |
| C(2)-C(1)-C(14)  | 121.11(17) |
| C(14)-C(1)-H(1A) | 119.4      |
| C(1)-C(2)-H(2)   | 121.1      |
| C(1)-C(2)-C(3)   | 117.72(17) |
| C(3)-C(2)-H(2)   | 121.1      |
| C(2)-C(3)-S(1)   | 128.98(14) |
| C(2)-C(3)-C(12)  | 121.80(15) |
| C(12)-C(3)-S(1)  | 109.22(12) |

|                  |            |
|------------------|------------|
| N(1)-C(4)-S(1)   | 117.05(13) |
| N(1)-C(4)-C(5)   | 124.25(15) |
| C(5)-C(4)-S(1)   | 118.69(12) |
| O(1)-C(5)-C(4)   | 110.63(14) |
| O(1)-C(5)-C(6)   | 113.20(14) |
| O(1)-C(5)-C(15)  | 104.20(14) |
| C(4)-C(5)-C(6)   | 111.09(14) |
| C(4)-C(5)-C(15)  | 108.90(14) |
| C(6)-C(5)-C(15)  | 108.50(14) |
| C(5)-C(6)-H(6A)  | 109.1      |
| C(5)-C(6)-H(6B)  | 109.1      |
| H(6A)-C(6)-H(6B) | 107.9      |
| C(7)-C(6)-C(5)   | 112.29(15) |
| C(7)-C(6)-H(6A)  | 109.1      |
| C(7)-C(6)-H(6B)  | 109.1      |
| O(2)-C(7)-C(6)   | 120.79(17) |
| O(2)-C(7)-C(8)   | 121.41(17) |
| C(8)-C(7)-C(6)   | 117.80(16) |
| C(9)-C(8)-C(7)   | 118.85(18) |
| C(17)-C(8)-C(7)  | 121.62(18) |
| C(17)-C(8)-C(9)  | 119.52(19) |
| C(8)-C(9)-H(9)   | 119.7      |

|                   |            |
|-------------------|------------|
| C(10)-C(9)-C(8)   | 120.7(2)   |
| C(10)-C(9)-H(9)   | 119.7      |
| C(9)-C(10)-H(10)  | 120.4      |
| C(11)-C(10)-C(9)  | 119.2(2)   |
| C(11)-C(10)-H(10) | 120.4      |
| C(10)-C(11)-H(11) | 119.6      |
| C(10)-C(11)-C(16) | 120.7(2)   |
| C(16)-C(11)-H(11) | 119.6      |
| N(1)-C(12)-C(3)   | 115.16(14) |
| N(1)-C(12)-C(13)  | 125.29(16) |
| C(13)-C(12)-C(3)  | 119.55(16) |
| C(12)-C(13)-H(13) | 120.7      |
| C(14)-C(13)-C(12) | 118.60(17) |
| C(14)-C(13)-H(13) | 120.7      |
| C(1)-C(14)-H(14)  | 119.4      |
| C(13)-C(14)-C(1)  | 121.20(16) |
| C(13)-C(14)-H(14) | 119.4      |
| F(1)-C(15)-F(3)   | 107.21(15) |
| F(1)-C(15)-C(5)   | 111.26(15) |
| F(2)-C(15)-F(1)   | 107.64(15) |
| F(2)-C(15)-F(3)   | 107.39(15) |
| F(2)-C(15)-C(5)   | 111.02(14) |

|                   |            |
|-------------------|------------|
| F(3)-C(15)-C(5)   | 112.09(14) |
| C(11)-C(16)-H(16) | 120.0      |
| C(17)-C(16)-C(11) | 120.1(2)   |
| C(17)-C(16)-H(16) | 120.0      |
| C(8)-C(17)-H(17)  | 120.2      |
| C(16)-C(17)-C(8)  | 119.7(2)   |
| C(16)-C(17)-H(17) | 120.2      |

---

Symmetry transformations used to generate equivalent atoms:

**Table 4. Anisotropic displacement parameters ( $\text{\AA}^2 \times 10^3$ ) for 2022031101\_0m.**

The anisotropic displacement factor exponent takes the form:  $-2\pi^2 [ h^2$

$a^*2U^{11} + \dots + 2 h k a^* b^* U^{12} ]$

---

| Atom | U <sup>11</sup> | U <sup>22</sup> | U <sup>33</sup> | U <sup>23</sup> | U <sup>13</sup> | U <sup>12</sup> |
|------|-----------------|-----------------|-----------------|-----------------|-----------------|-----------------|
| S(1) | 44(1)           | 20(1)           | 21(1)           | -2(1)           | 7(1)            | 6(1)            |
| F(1) | 48(1)           | 49(1)           | 33(1)           | 19(1)           | 7(1)            | -2(1)           |
| F(2) | 32(1)           | 28(1)           | 38(1)           | -1(1)           | 5(1)            | -4(1)           |
| F(3) | 42(1)           | 35(1)           | 43(1)           | -1(1)           | 21(1)           | 4(1)            |
| O(1) | 41(1)           | 31(1)           | 21(1)           | -3(1)           | -1(1)           | -3(1)           |
| O(2) | 39(1)           | 28(1)           | 51(1)           | -6(1)           | 9(1)            | -8(1)           |
| N(1) | 27(1)           | 20(1)           | 21(1)           | -1(1)           | 4(1)            | 0(1)            |
| C(1) | 28(1)           | 37(1)           | 31(1)           | 14(1)           | 5(1)            | 5(1)            |

|       |       |       |        |       |       |       |
|-------|-------|-------|--------|-------|-------|-------|
| C(2)  | 32(1) | 28(1) | 32(1)  | 5(1)  | 10(1) | 9(1)  |
| C(3)  | 24(1) | 24(1) | 22(1)  | 0(1)  | 6(1)  | 2(1)  |
| C(4)  | 26(1) | 18(1) | 22(1)  | 0(1)  | 4(1)  | 1(1)  |
| C(5)  | 30(1) | 22(1) | 20(1)  | 0(1)  | 2(1)  | -1(1) |
| C(6)  | 27(1) | 21(1) | 28(1)  | 3(1)  | 2(1)  | 0(1)  |
| C(7)  | 27(1) | 26(1) | 28(1)  | 3(1)  | -2(1) | -2(1) |
| C(8)  | 22(1) | 29(1) | 33(1)  | 3(1)  | -2(1) | 0(1)  |
| C(9)  | 27(1) | 31(1) | 37(1)  | 1(1)  | -1(1) | -5(1) |
| C(10) | 24(1) | 44(1) | 49(1)  | -1(1) | 5(1)  | -2(1) |
| C(11) | 33(1) | 41(1) | 84(2)  | -4(1) | 18(1) | 7(1)  |
| C(12) | 22(1) | 22(1) | 21(1)  | 0(1)  | 4(1)  | -1(1) |
| C(13) | 31(1) | 32(1) | 22(1)  | -1(1) | 4(1)  | -1(1) |
| C(14) | 30(1) | 44(1) | 22(1)  | 6(1)  | 2(1)  | 0(1)  |
| C(15) | 34(1) | 27(1) | 25(1)  | 3(1)  | 7(1)  | 2(1)  |
| C(16) | 42(1) | 29(1) | 110(2) | 4(1)  | 25(1) | 8(1)  |
| C(17) | 34(1) | 30(1) | 65(1)  | 8(1)  | 14(1) | 3(1)  |

---

**Table 5. Hydrogen coordinates ( $\text{\AA}\times 10^4$ ) and isotropic displacement parameters ( $\text{\AA}^2\times 10^3$ ) for 2022031101\_0m.**

| <b>Atom</b> | <b>x</b> | <b>y</b> | <b>z</b> | <b>U(eq)</b> |
|-------------|----------|----------|----------|--------------|
| H(1A)       | 2828     | 11164    | 3217     | 38           |



|       |          |          |           |       |
|-------|----------|----------|-----------|-------|
| H(2)  | 2922     | 11425    | 5864      | 36    |
| H(6A) | 4155     | 2518     | 9719      | 31    |
| H(6B) | 3916     | 2559     | 8021      | 31    |
| H(9)  | 5383     | 4953     | 6765      | 38    |
| H(10) | 5948     | 2962     | 5567      | 46    |
| H(11) | 5874     | -324     | 5811      | 62    |
| H(13) | 3375     | 5750     | 3404      | 34    |
| H(14) | 3064     | 8377     | 2007      | 38    |
| H(16) | 5242     | -1634    | 7240      | 71    |
| H(17) | 4646     | 346      | 8330      | 51    |
| H(1)  | 4175(11) | 6350(40) | 10330(30) | 44(8) |

**Table 6. Torsion angles for 3aa.**

| A    | B    | C     | D     | Angle/°     |
|------|------|-------|-------|-------------|
| S(1) | C(3) | C(12) | N(1)  | 0.50(18)    |
| S(1) | C(3) | C(12) | C(13) | -178.79(13) |
| S(1) | C(4) | C(5)  | O(1)  | -27.31(19)  |
| S(1) | C(4) | C(5)  | C(6)  | -153.91(12) |
| S(1) | C(4) | C(5)  | C(15) | 86.64(16)   |
| O(1) | C(5) | C(6)  | C(7)  | -61.54(18)  |
| O(1) | C(5) | C(15) | F(1)  | -61.48(18)  |

|                        |             |
|------------------------|-------------|
| O(1)-C(5)-C(15)-F(2)   | 178.66(14)  |
| O(1)-C(5)-C(15)-F(3)   | 58.56(18)   |
| O(2)-C(7)-C(8)-C(9)    | -15.5(3)    |
| O(2)-C(7)-C(8)-C(17)   | 164.6(2)    |
| N(1)-C(4)-C(5)-O(1)    | 153.23(16)  |
| N(1)-C(4)-C(5)-C(6)    | 26.6(2)     |
| N(1)-C(4)-C(5)-C(15)   | -92.82(19)  |
| N(1)-C(12)-C(13)-C(14) | 179.78(16)  |
| C(1)-C(2)-C(3)-S(1)    | 179.67(15)  |
| C(1)-C(2)-C(3)-C(12)   | -0.8(3)     |
| C(2)-C(1)-C(14)-C(13)  | 1.1(3)      |
| C(2)-C(3)-C(12)-N(1)   | -179.13(16) |
| C(2)-C(3)-C(12)-C(13)  | 1.6(2)      |
| C(3)-S(1)-C(4)-N(1)    | 0.35(14)    |
| C(3)-S(1)-C(4)-C(5)    | -179.15(14) |
| C(3)-C(12)-C(13)-C(14) | -1.0(2)     |
| C(4)-S(1)-C(3)-C(2)    | 179.15(17)  |
| C(4)-S(1)-C(3)-C(12)   | -0.44(12)   |
| C(4)-N(1)-C(12)-C(3)   | -0.3(2)     |
| C(4)-N(1)-C(12)-C(13)  | 178.99(16)  |
| C(4)-C(5)-C(6)-C(7)    | 63.63(18)   |
| C(4)-C(5)-C(15)-F(1)   | -179.57(15) |

|                         |             |
|-------------------------|-------------|
| C(4)-C(5)-C(15)-F(2)    | 60.58(18)   |
| C(4)-C(5)-C(15)-F(3)    | -59.52(18)  |
| C(5)-C(6)-C(7)-O(2)     | 9.9(2)      |
| C(5)-C(6)-C(7)-C(8)     | -170.03(15) |
| C(6)-C(5)-C(15)-F(1)    | 59.39(18)   |
| C(6)-C(5)-C(15)-F(2)    | -60.46(17)  |
| C(6)-C(5)-C(15)-F(3)    | 179.44(14)  |
| C(6)-C(7)-C(8)-C(9)     | 164.44(16)  |
| C(6)-C(7)-C(8)-C(17)    | -15.4(3)    |
| C(7)-C(8)-C(9)-C(10)    | -177.79(18) |
| C(7)-C(8)-C(17)-C(16)   | 179.7(2)    |
| C(8)-C(9)-C(10)-C(11)   | -2.0(3)     |
| C(9)-C(8)-C(17)-C(16)   | -0.2(4)     |
| C(9)-C(10)-C(11)-C(16)  | 0.0(4)      |
| C(10)-C(11)-C(16)-C(17) | 1.9(5)      |
| C(11)-C(16)-C(17)-C(8)  | -1.8(5)     |
| C(12)-N(1)-C(4)-S(1)    | -0.12(18)   |
| C(12)-N(1)-C(4)-C(5)    | 179.35(15)  |
| C(12)-C(13)-C(14)-C(1)  | -0.3(3)     |
| C(14)-C(1)-C(2)-C(3)    | -0.5(3)     |
| C(15)-C(5)-C(6)-C(7)    | -176.69(14) |
| C(17)-C(8)-C(9)-C(10)   | 2.1(3)      |

### Crystal structure determination of 3aa

**Crystal Data** for  $C_{17}H_{12}F_3NO_2S$  ( $M = 351.34$  g/mol): orthorhombic, space group  $C 121$ ,  $a = 25.755(3)$  Å,  $b = 6.9641(8)$  Å,  $c = 8.7584(10)$  Å,  $V = 1566.8(3)$  Å<sup>3</sup>,  $Z = 4$ ,  $T = 273.15$  K,  $\mu(\text{MoK}\alpha) = 0.249$  mm<sup>-1</sup>,  $D_{\text{calc}} = 1.489$  g/cm<sup>3</sup>, 10899 reflections measured ( $2.331^\circ \leq 2\Theta \leq 28.338^\circ$ ), 3882 unique ( $R_{\text{int}} = 0.0345$ ) which were used in all calculations. The final  $R_1$  was 0.0275 ( $I > 2\sigma(I)$ ) and  $wR_2$  was 0.0699 (all data).

## VI. References

- 1 Y. Fukata, T. Okamura, K. Asano and S. Matsubara, *Org. Lett.*, 2014, **16**, 2184–2187.
- 2 N. R. Amarasinghe, P. Turner and M. H. Todd, *Adv. Synth. Catal.*, 2012, **354**, 2954–2958.
- 3 L.-N. Jia, J. Huang, L. Peng, L.-L. Wang, J.-F. Bai, F. Tian, G.-Y. He, X.-Y. Xu and L.-X. Wang, *Org. Biomol. Chem.*, 2012, **10**, 236–239.
- 4 P. V. Khodakovskiy, D. M. Volochnyuk, D. M. Panov, I. I. Pervak, E. V. Zarudnitskii, O. V. Shishkin, A. A. Yurchenko, A. Shivanyuk and A. A. Tolmachev, *Synthesis*, 2008, **6**, 948–956.
- 5 W. Wang, W. Xiong, J. Wang, Q.-A. Wang and W. Yang, *J. Org. Chem.*, 2020, **85**, 4398–4407.

## VII. Copies of NMR Spectra

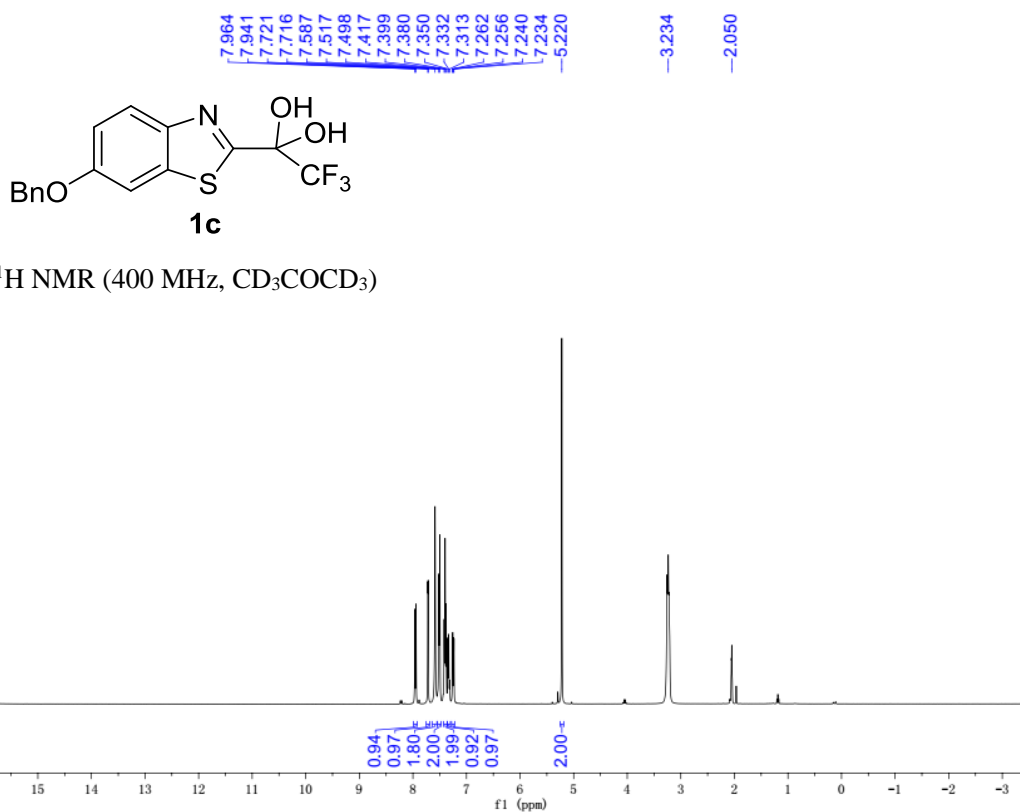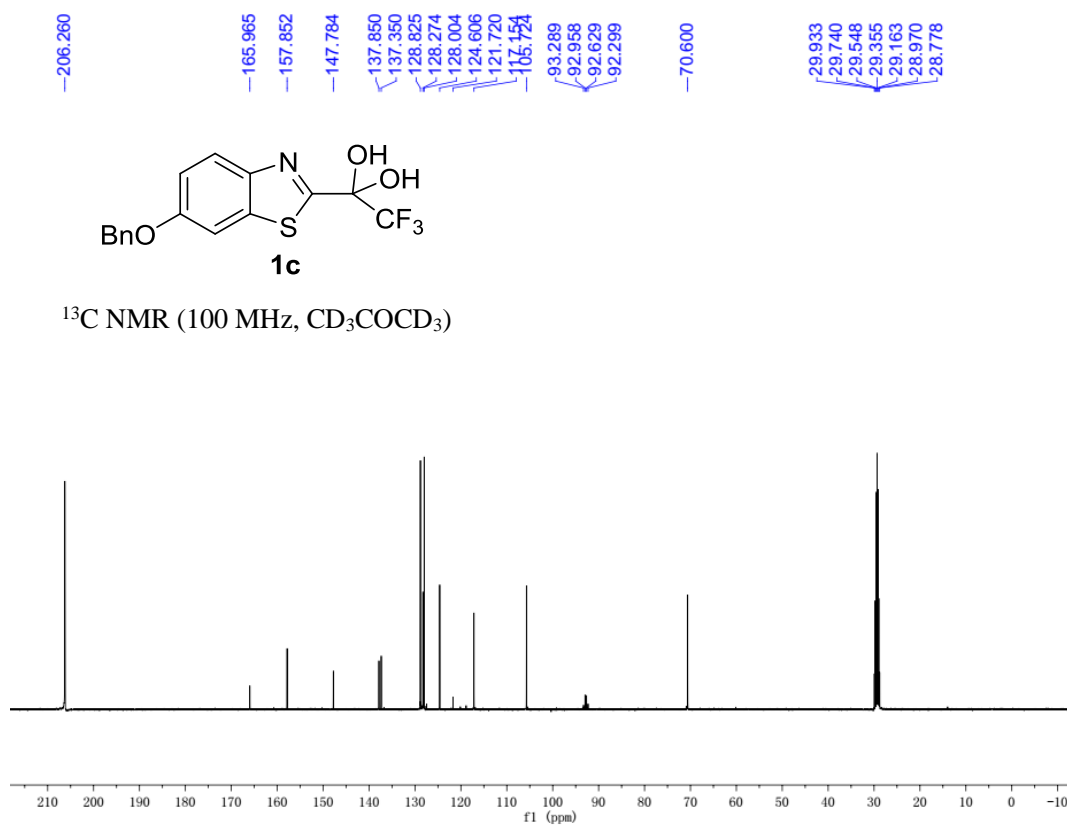

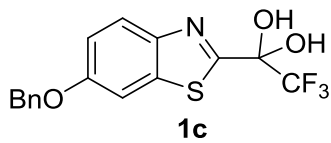

<sup>19</sup>F NMR (376.5 MHz, CD<sub>3</sub>COCD<sub>3</sub>)

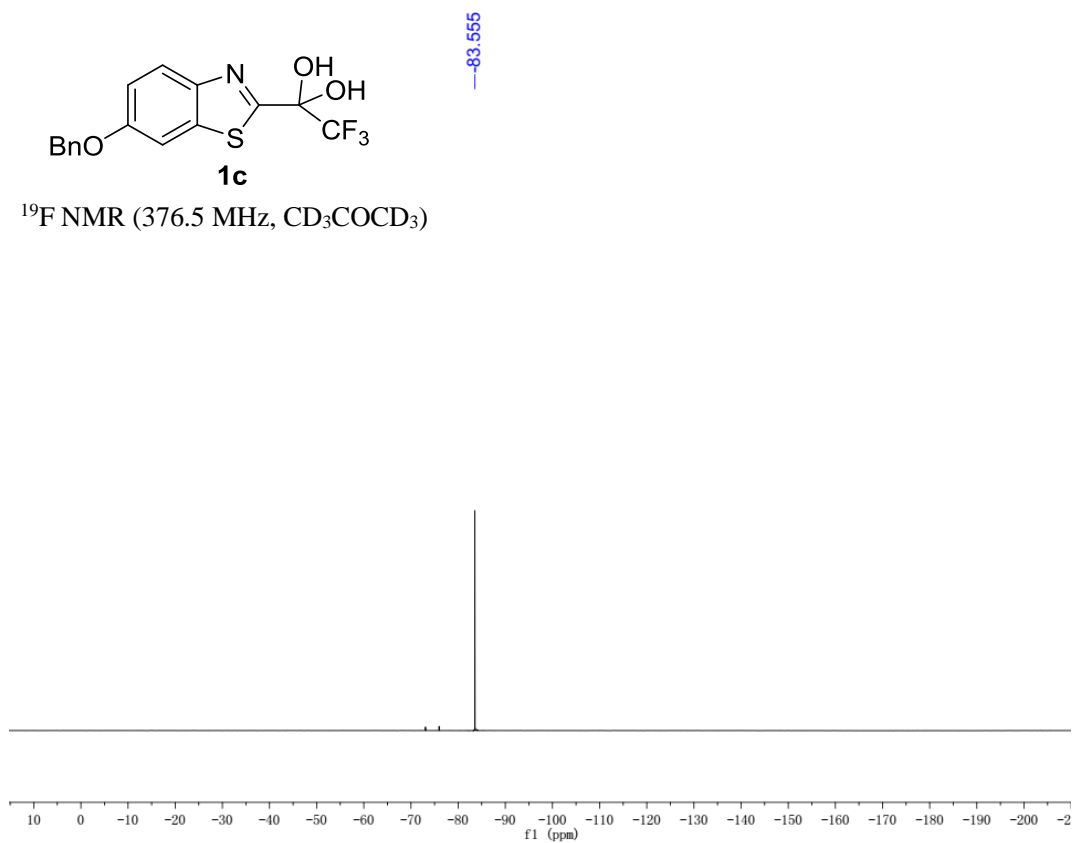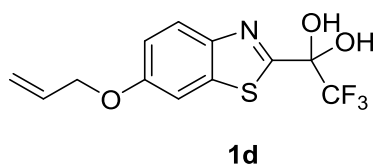

<sup>1</sup>H NMR (400 MHz, CD<sub>3</sub>COCD<sub>3</sub>)

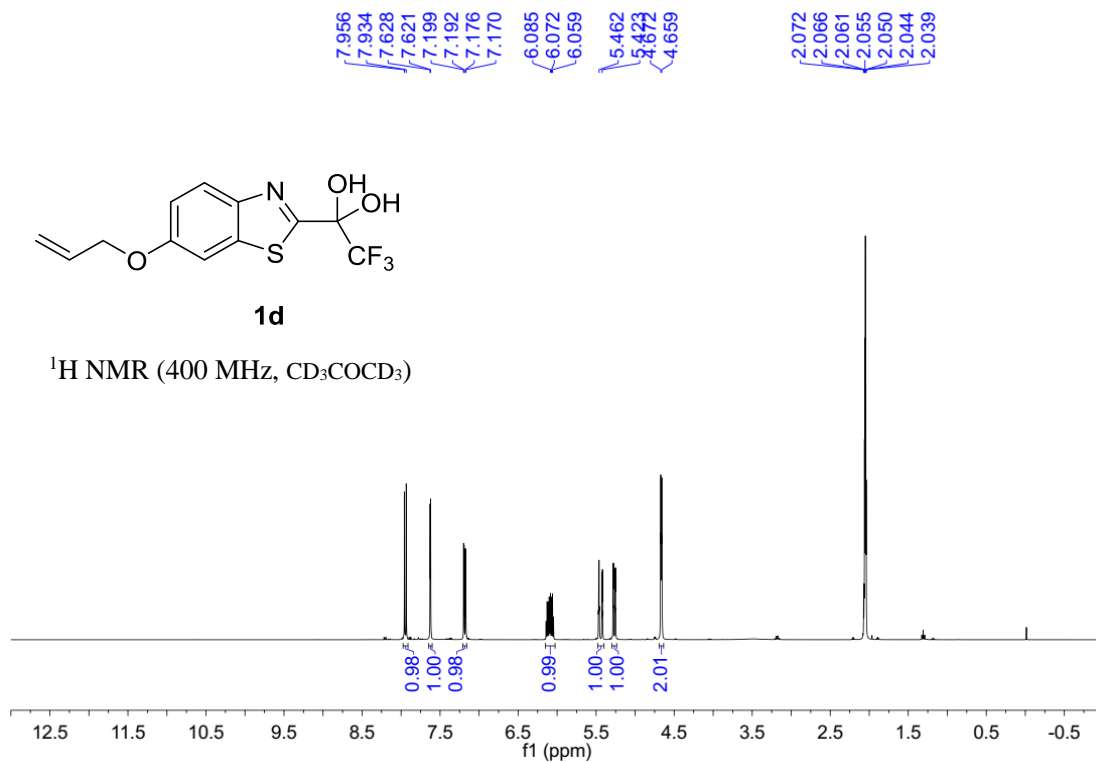

-206.260  
 -165.415  
 -157.333  
 -147.323  
 137.463  
 133.331  
 127.057  
 124.227  
 124.207  
 121.346  
 116.989  
 105.977  
 92.789  
 92.469  
 92.140  
 91.800  
 -69.037  
 29.674  
 29.616  
 29.535  
 29.480  
 29.424  
 29.342  
 29.288  
 29.231  
 29.094  
 29.039  
 28.902  
 28.848  
 28.653  
 28.461

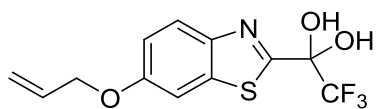

**1d**

$^{13}\text{C}$  NMR (100 MHz,  $\text{CD}_3\text{COCD}_3$ )

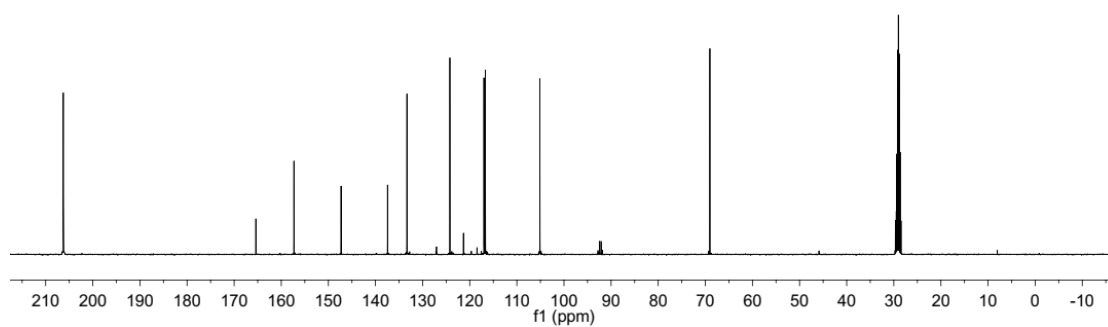

-83.534

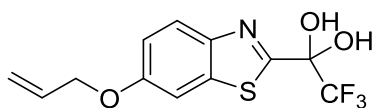

**1d**

$^{19}\text{F}$  NMR (376.5 MHz,  $\text{CD}_3\text{COCD}_3$ )

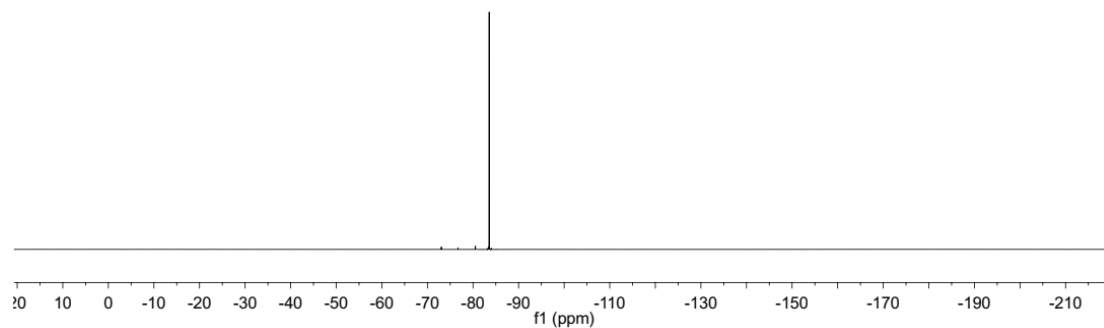



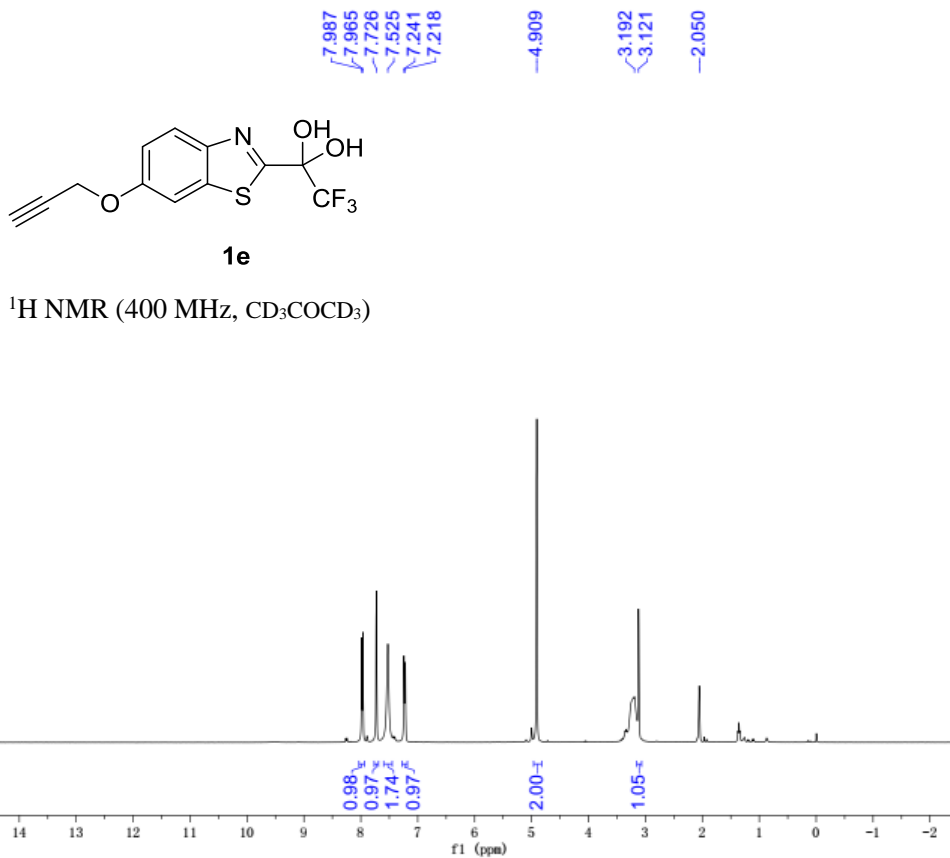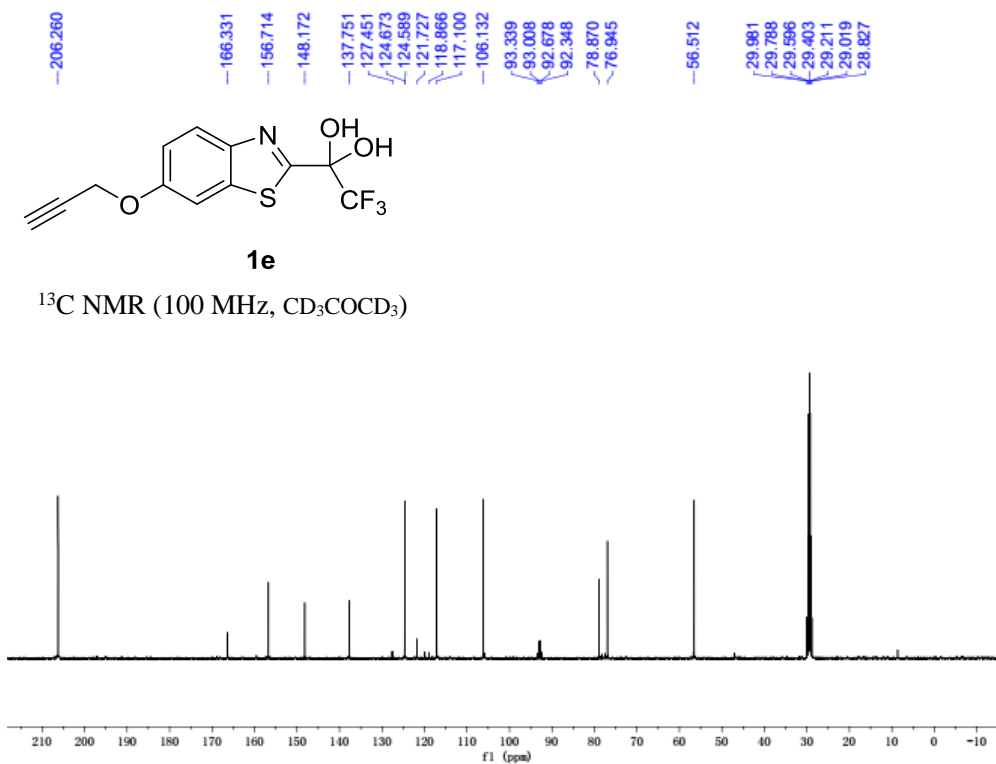

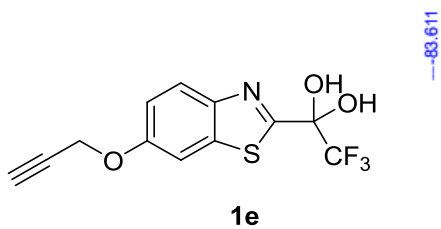

$^{19}\text{F}$  NMR (376.5 MHz,  $\text{CD}_3\text{COCD}_3$ )

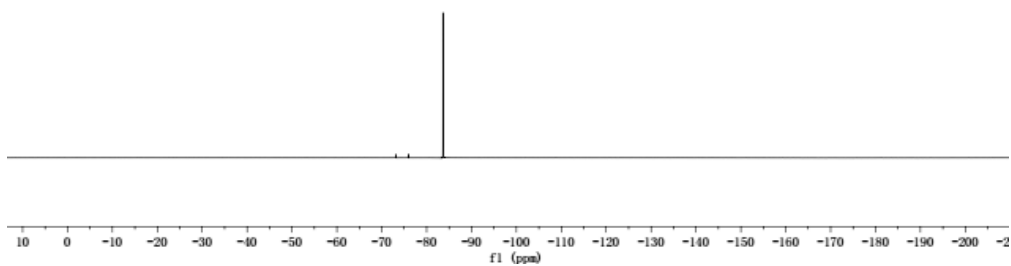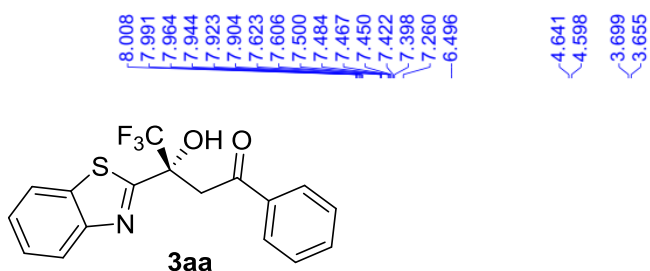

$^1\text{H}$  NMR (400 MHz,  $\text{CDCl}_3$ )

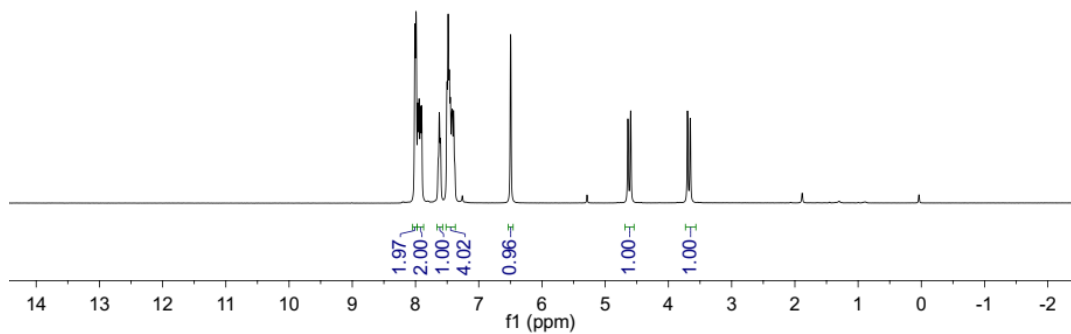

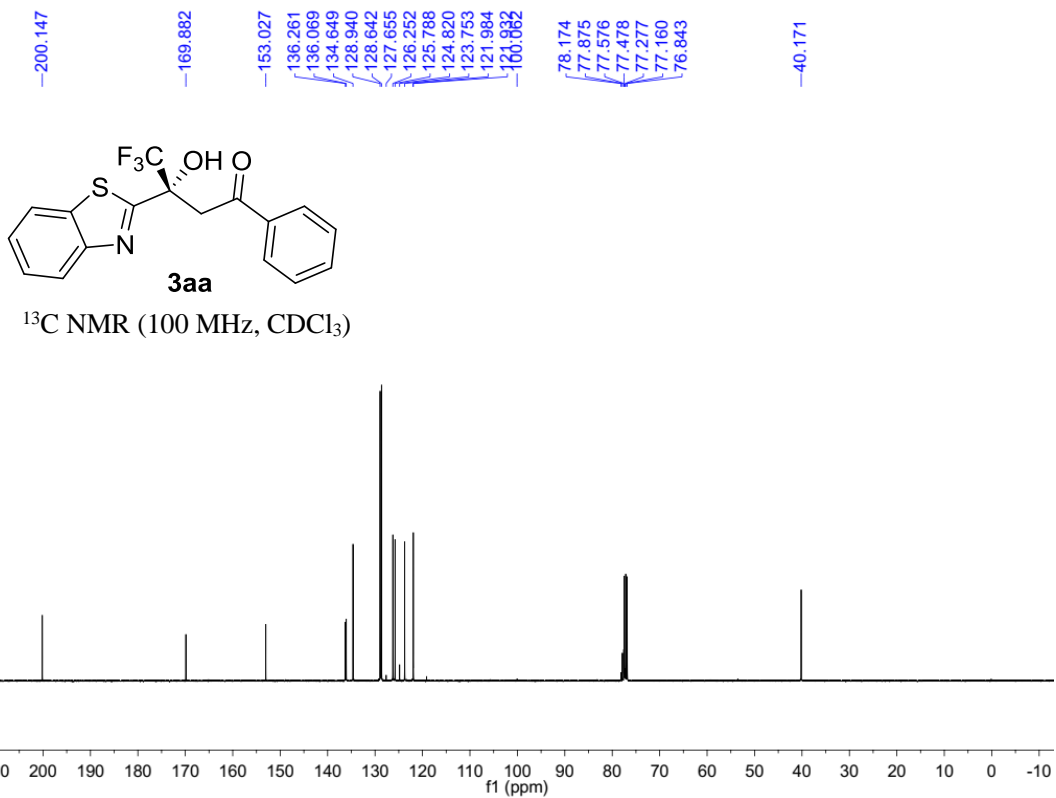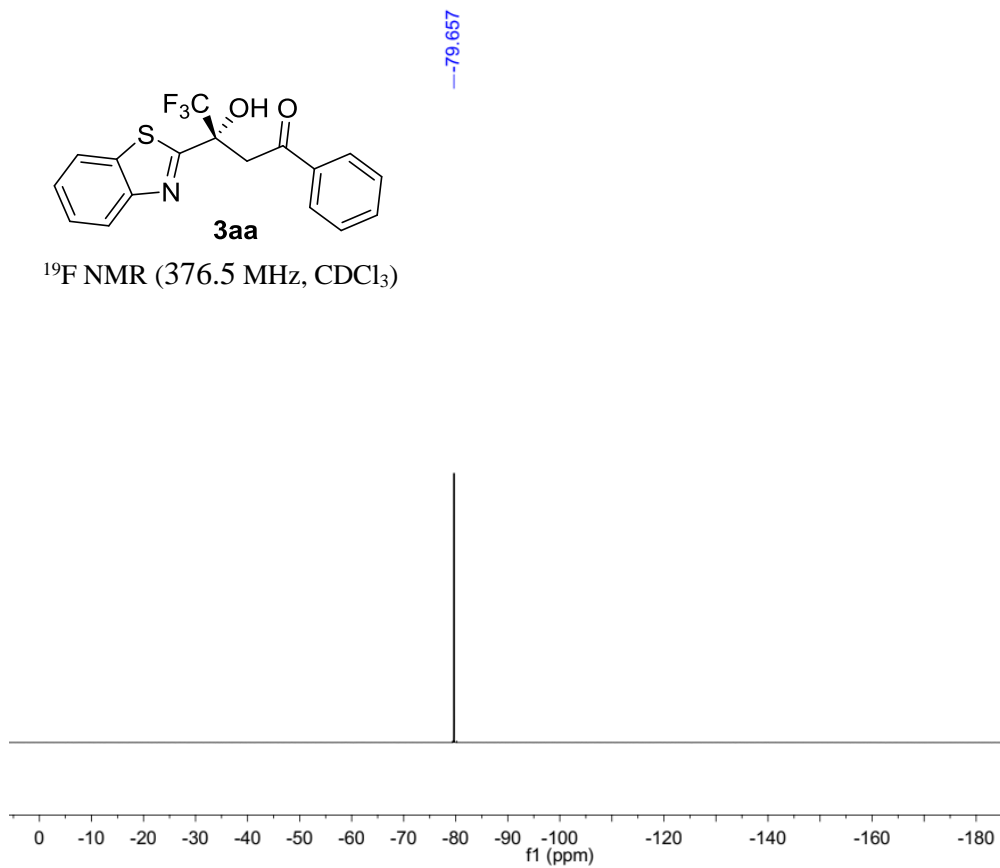

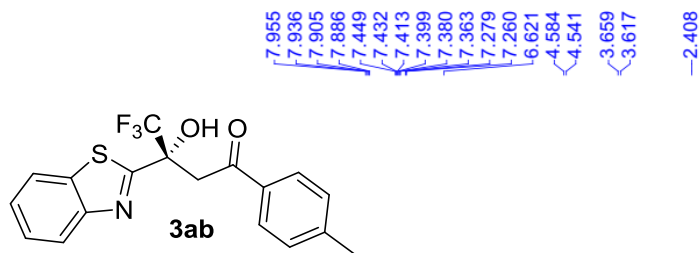

$^1\text{H NMR}$  (400 MHz,  $\text{CDCl}_3$ )

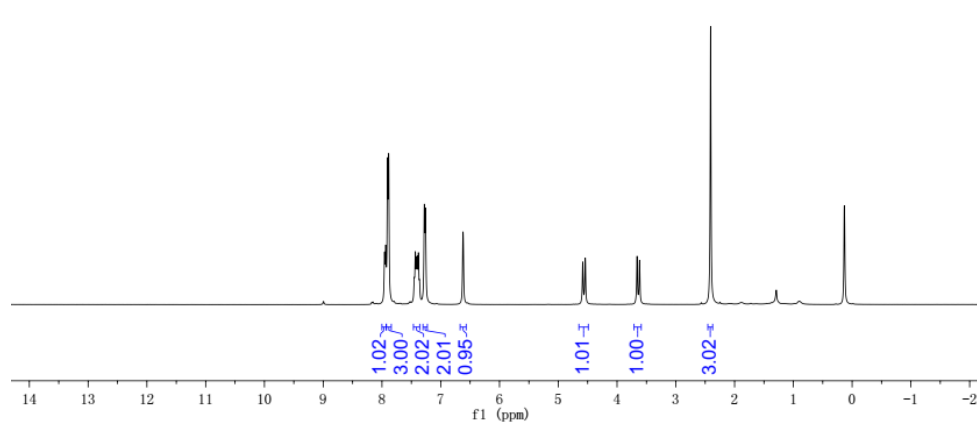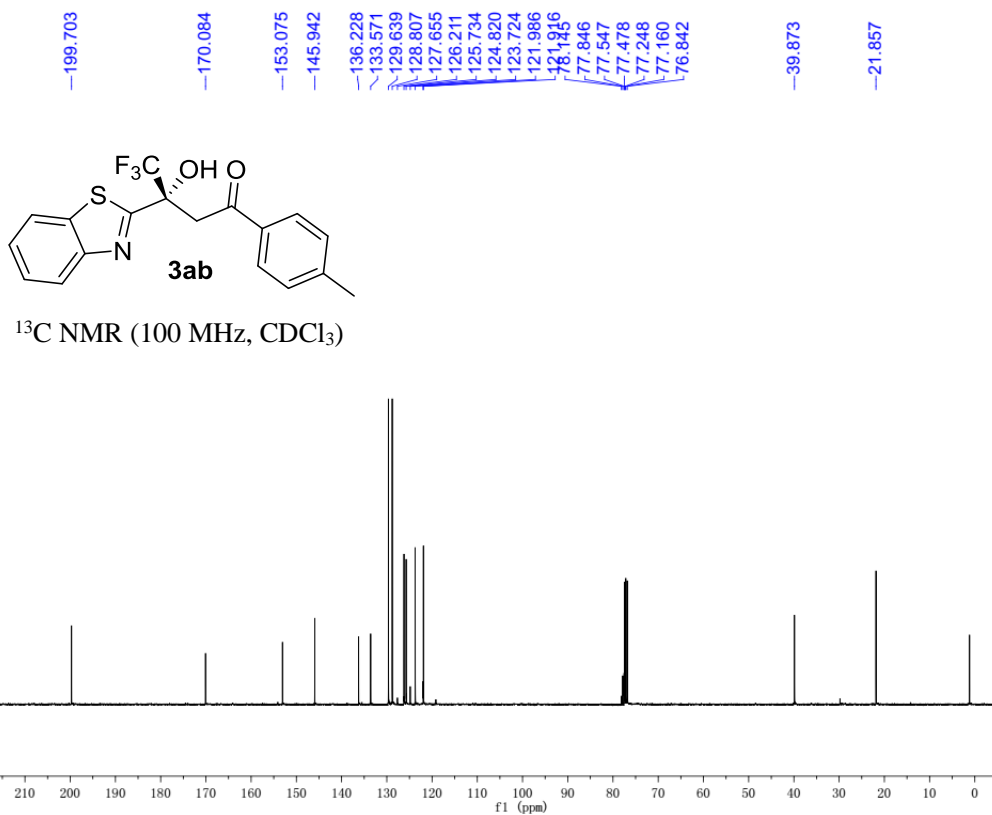

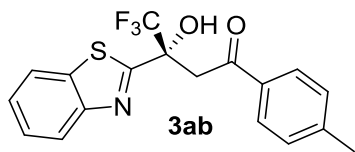

$^{19}\text{F}$  NMR (376.5 MHz,  $\text{CDCl}_3$ )

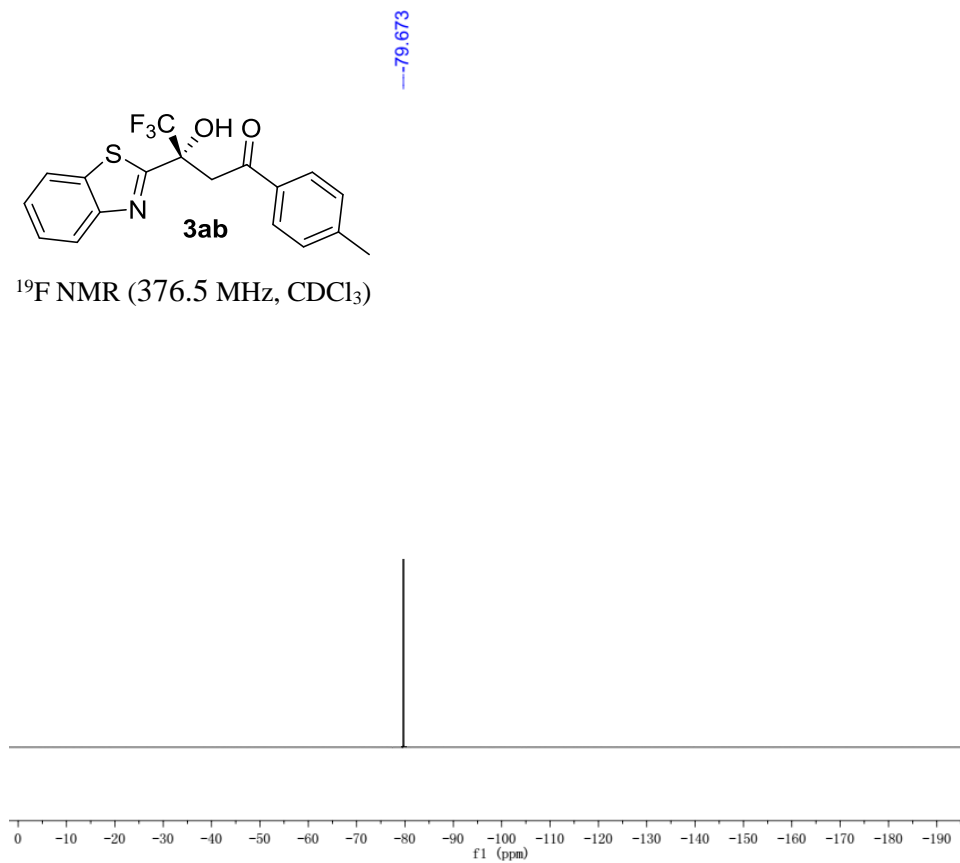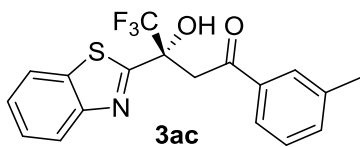

$^1\text{H}$  NMR (400 MHz,  $\text{CDCl}_3$ )

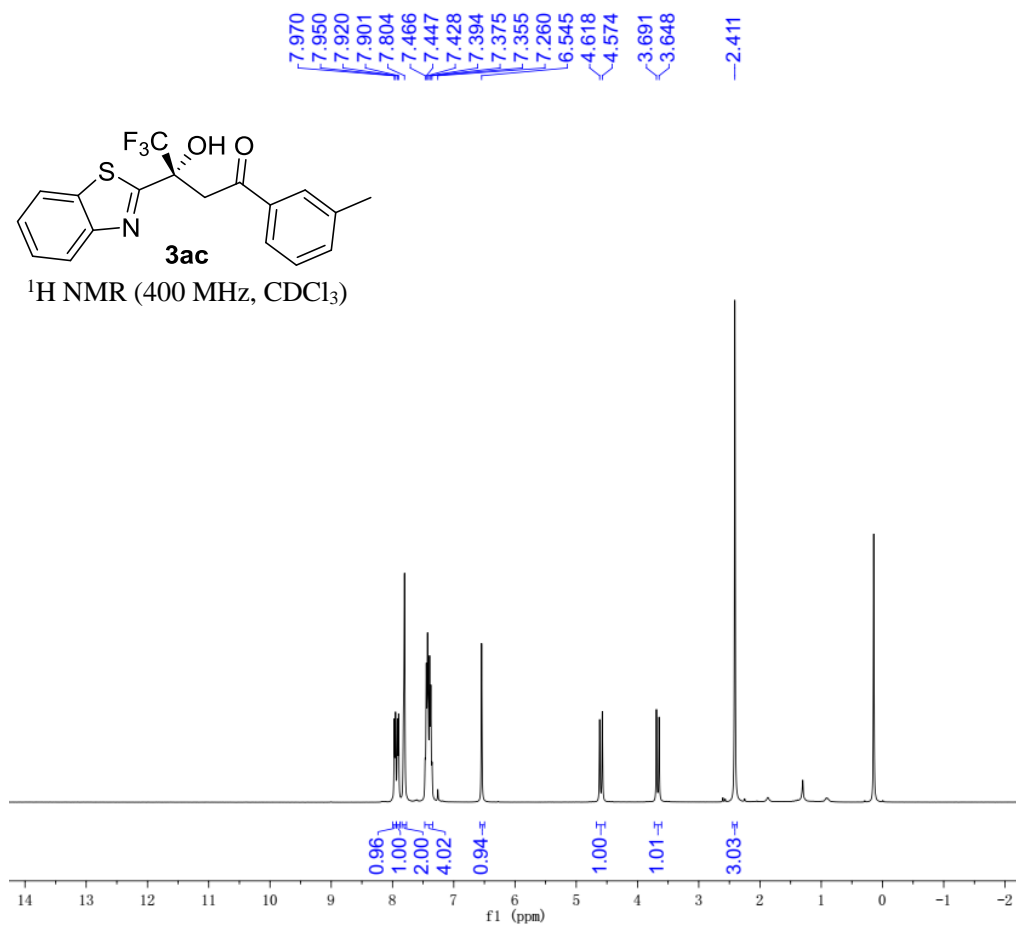

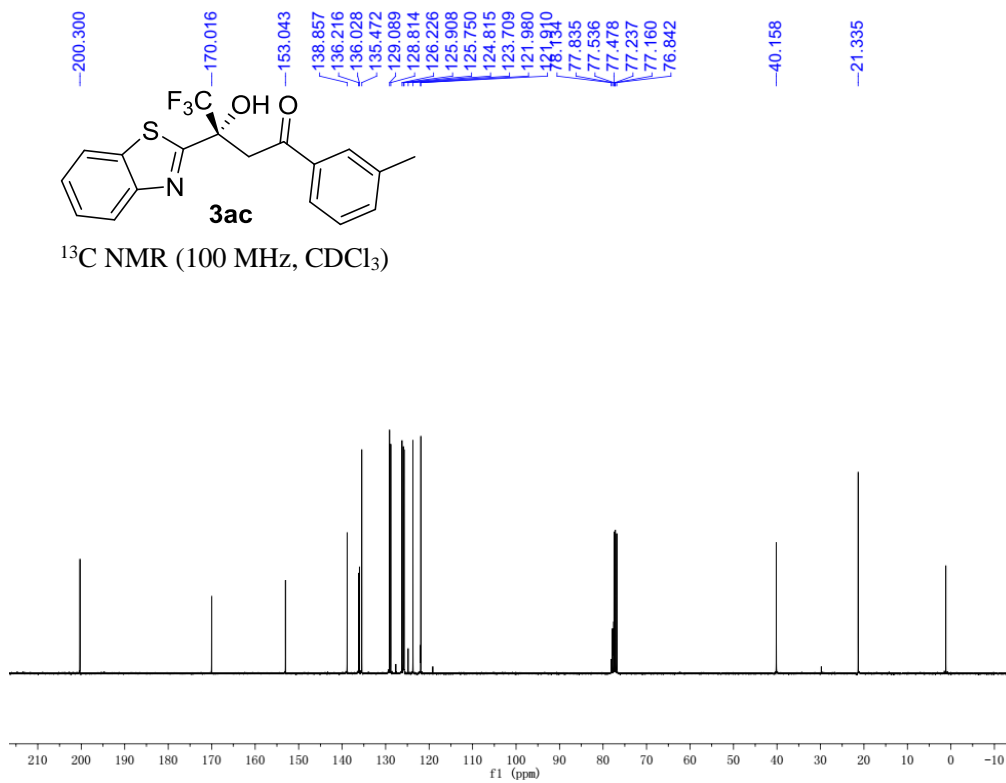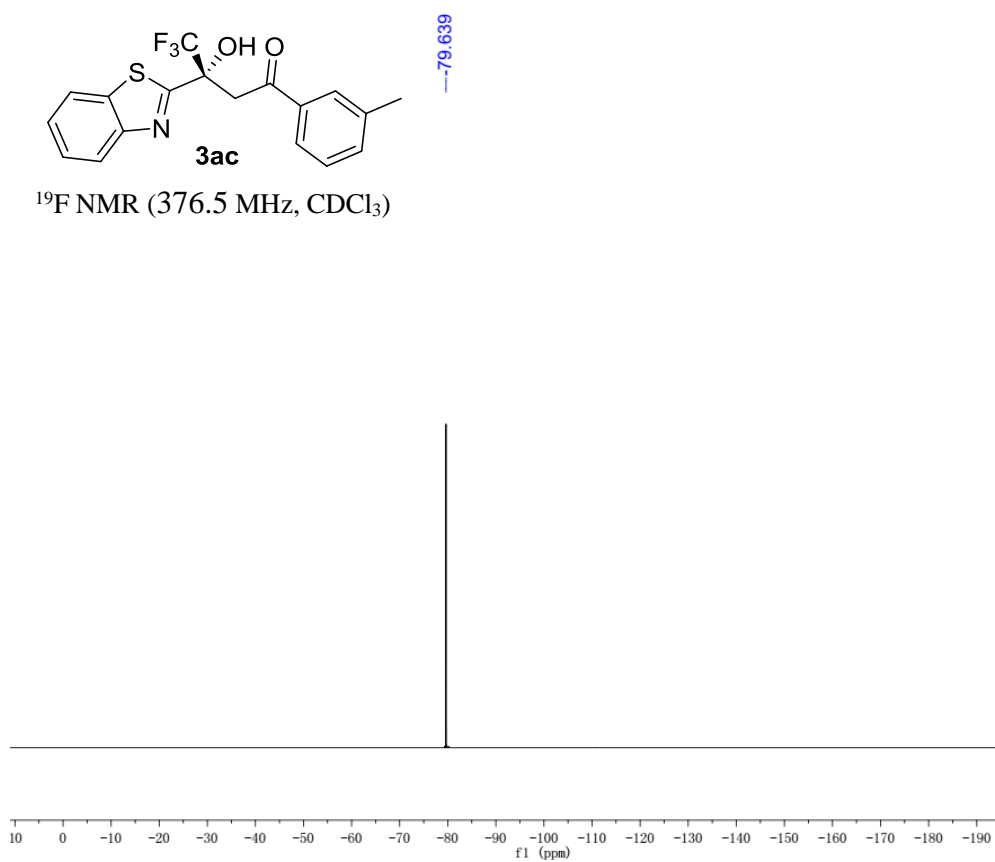

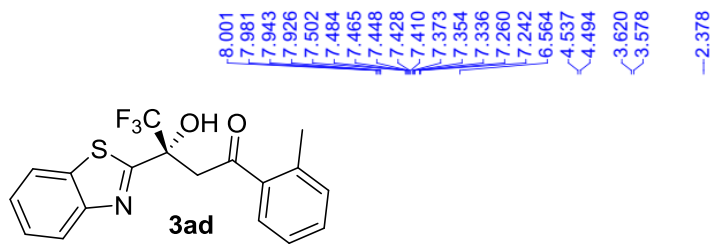

<sup>1</sup>H NMR (400 MHz, CDCl<sub>3</sub>)

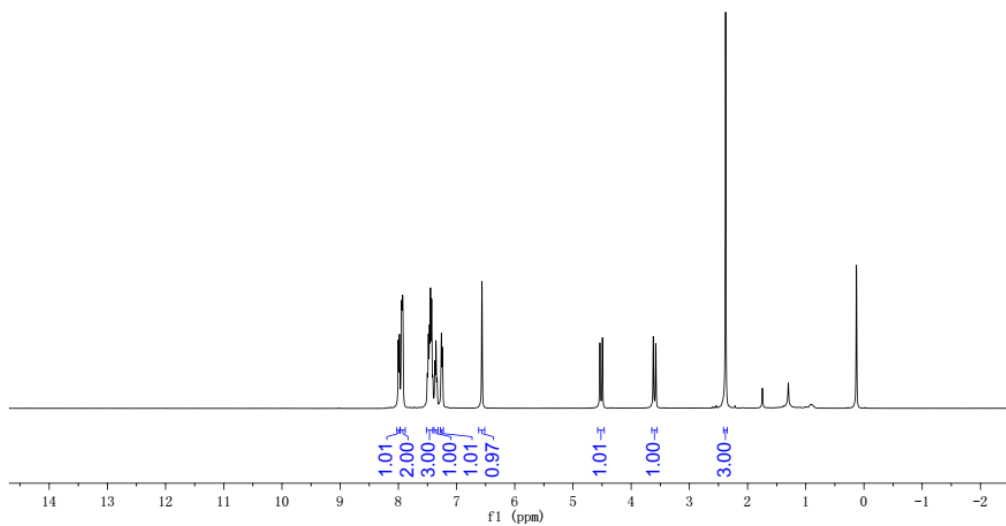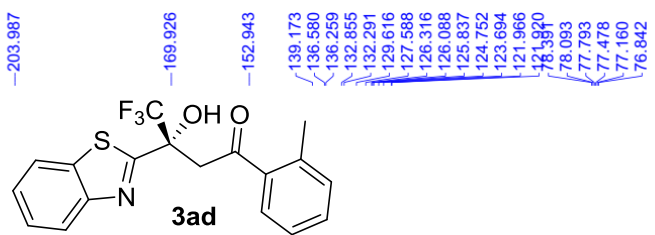

<sup>13</sup>C NMR (100 MHz, CDCl<sub>3</sub>)

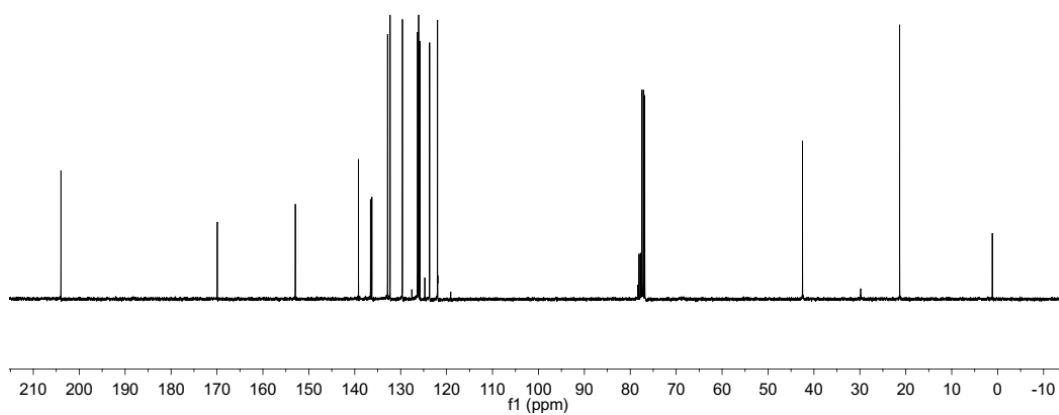

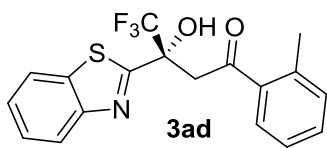

$^{19}\text{F}$  NMR (376.5 MHz,  $\text{CDCl}_3$ )

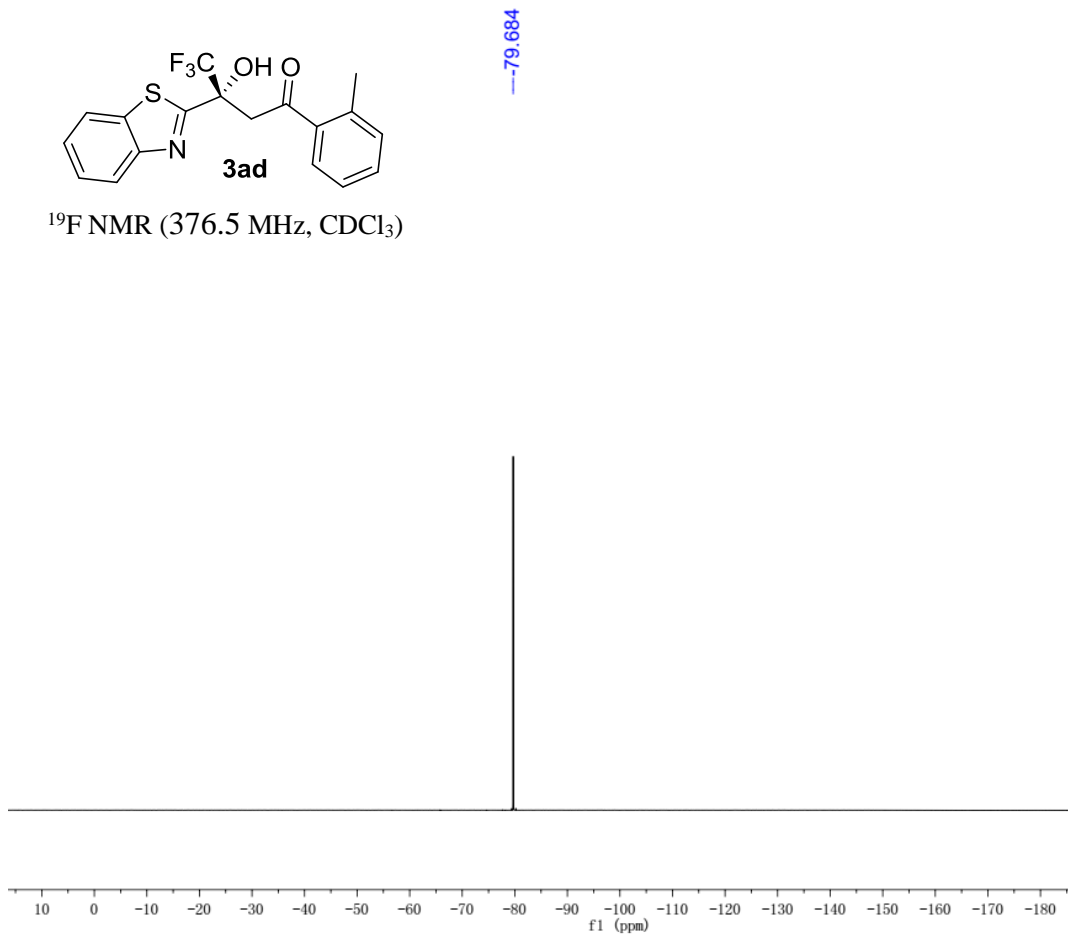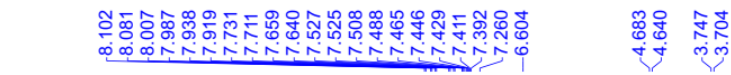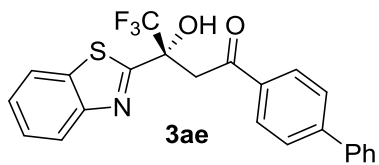

$^1\text{H}$  NMR (400 MHz,  $\text{CDCl}_3$ )

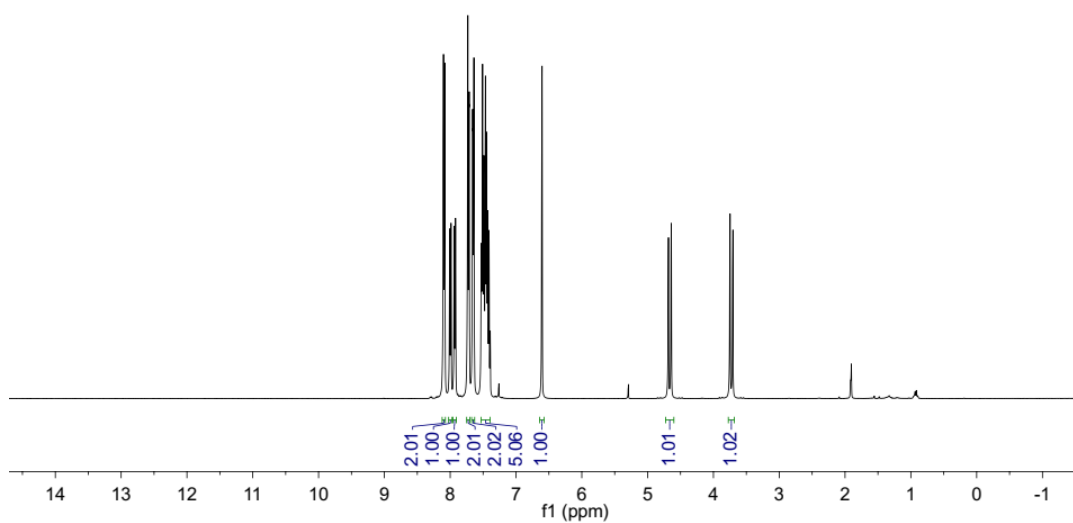



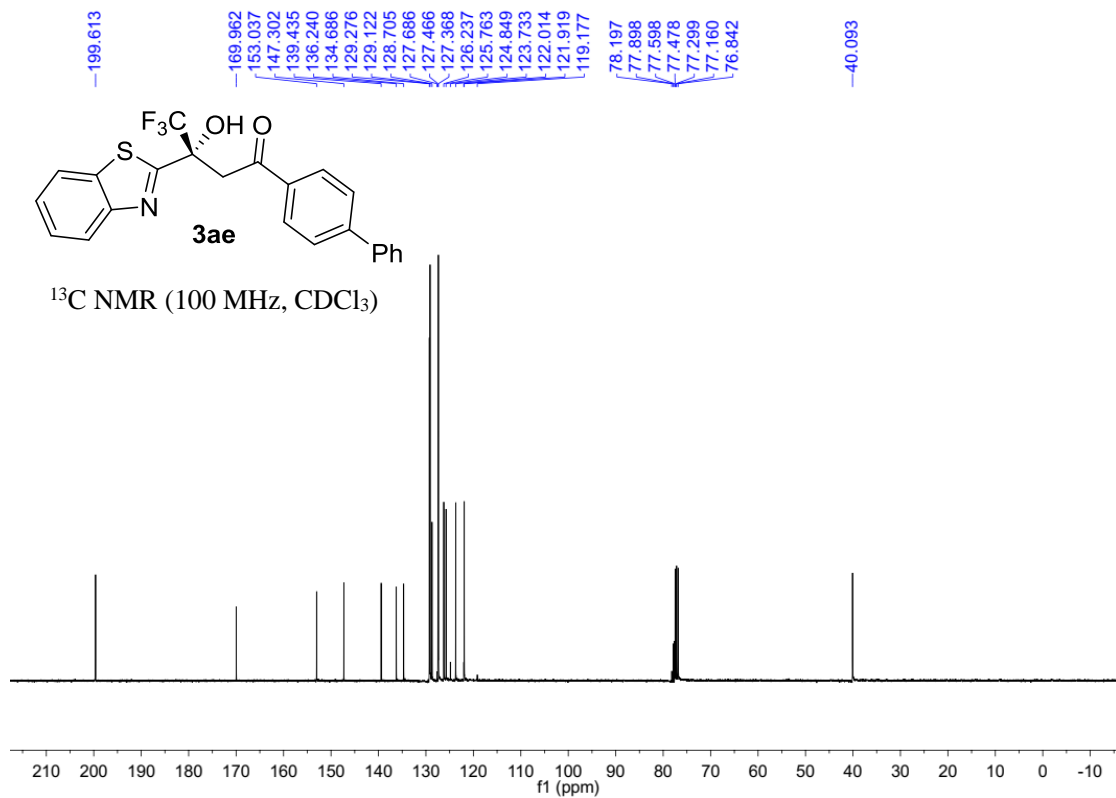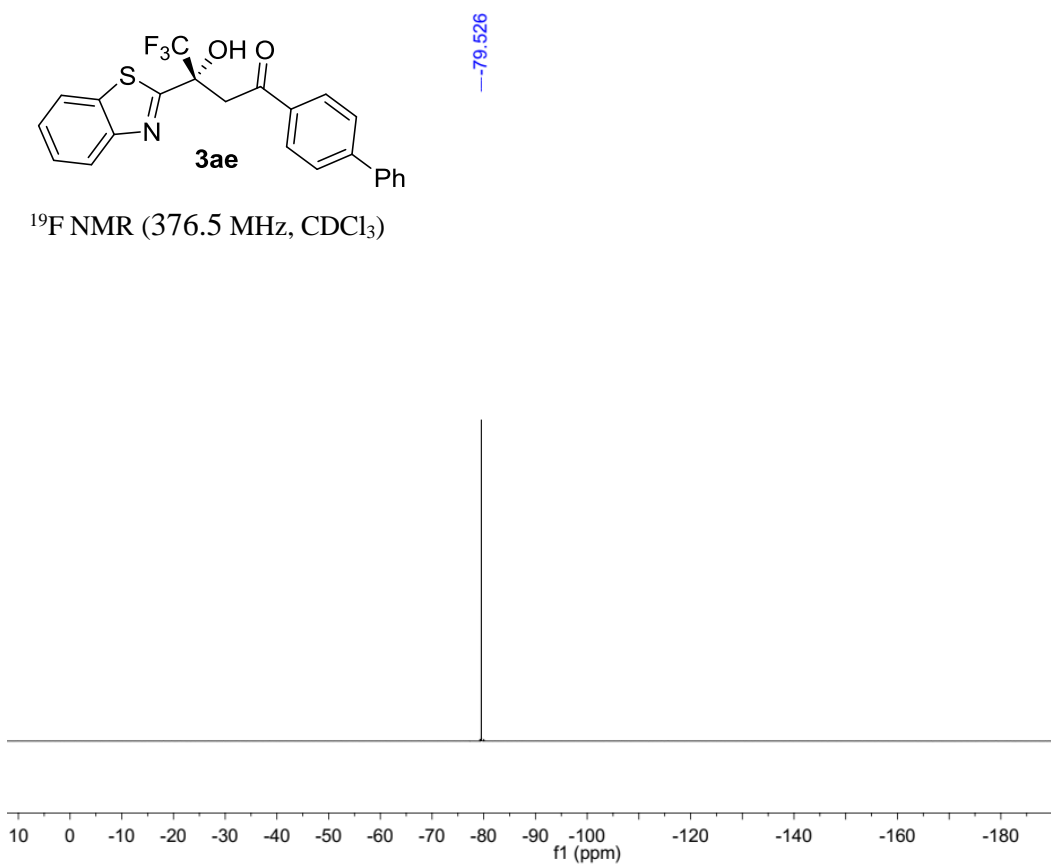

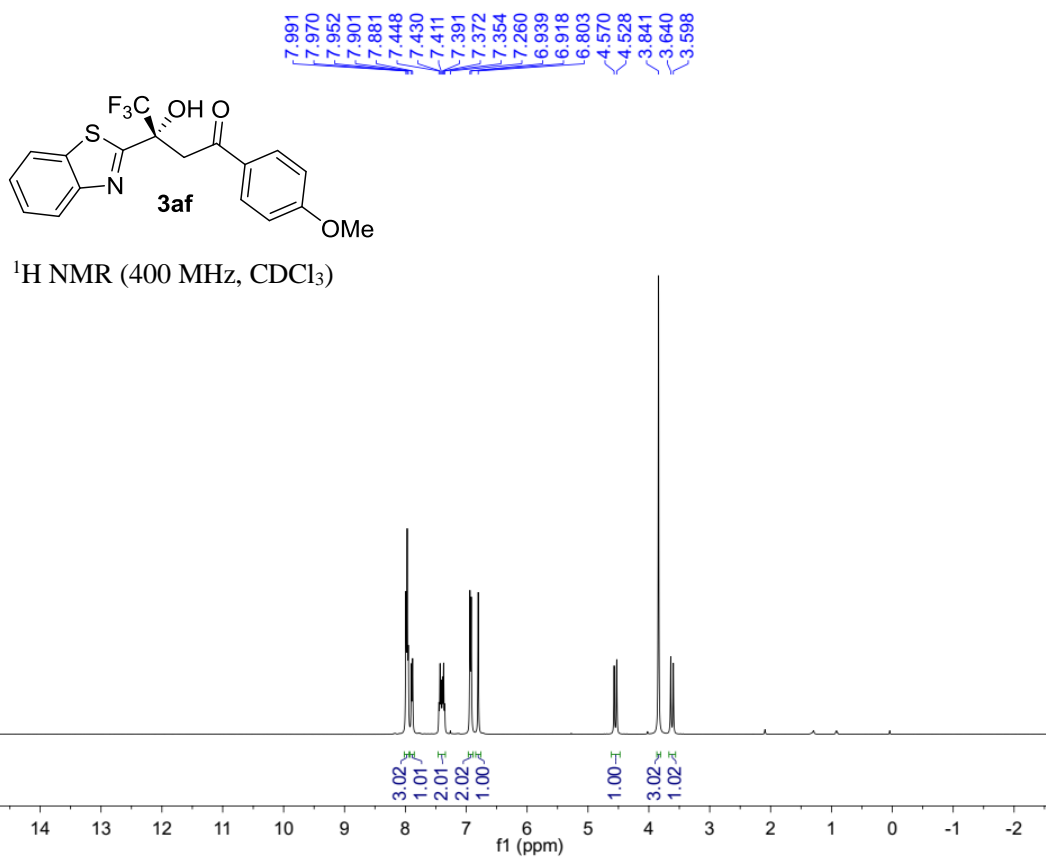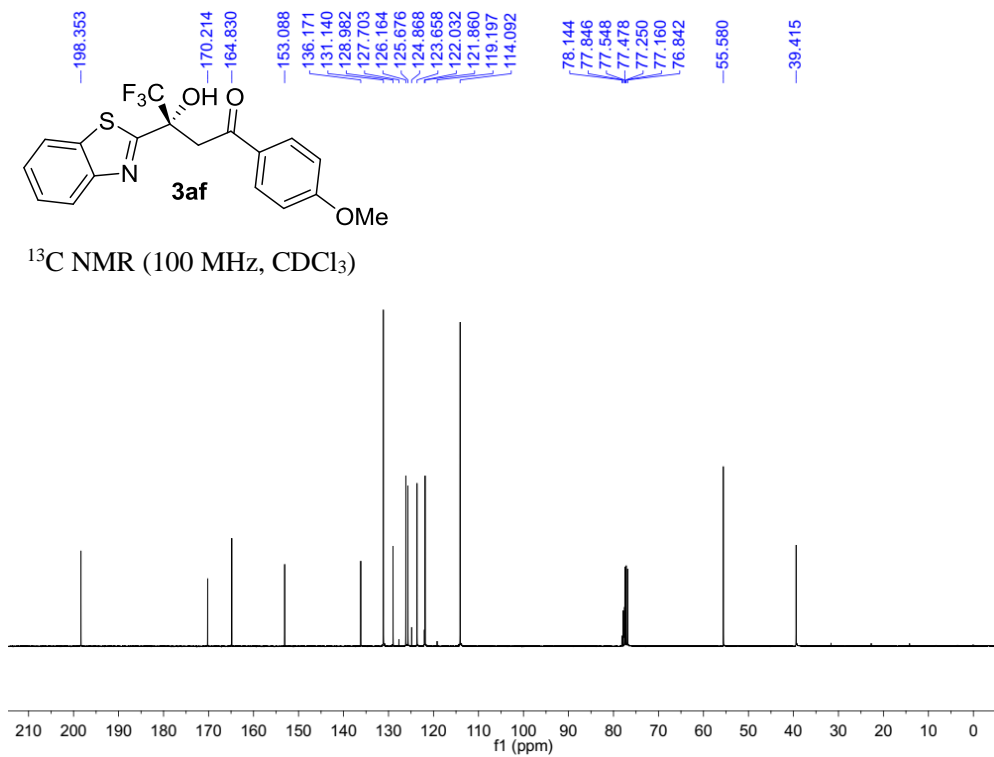

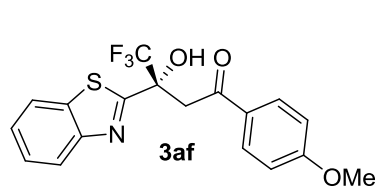

-79.597

$^{19}\text{F}$  NMR (376.5 MHz,  $\text{CDCl}_3$ )

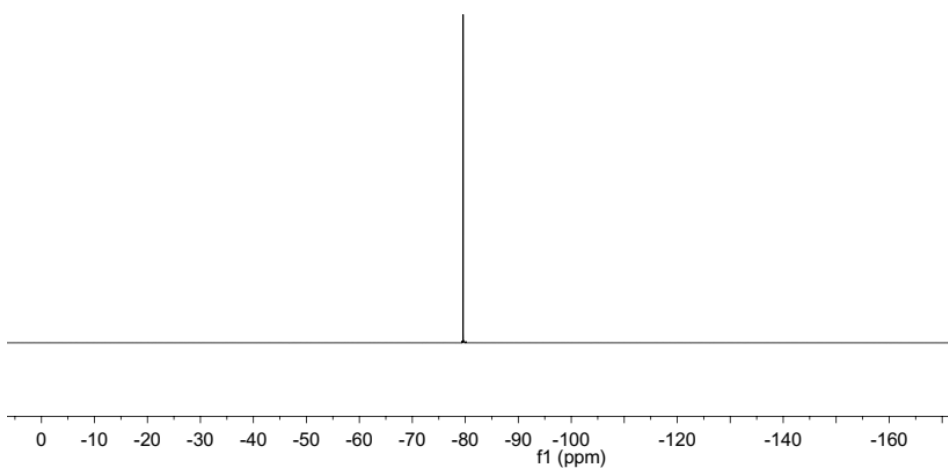

7.972  
 7.953  
 7.912  
 7.895  
 7.627  
 7.611  
 7.472  
 7.445  
 7.423  
 7.408  
 7.394  
 7.375  
 7.260  
 7.181  
 7.163  
 6.466  
 4.619  
 4.575  
 3.817  
 3.704  
 3.661

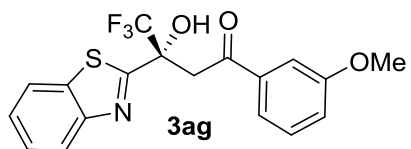

$^1\text{H}$  NMR (400 MHz,  $\text{CDCl}_3$ )

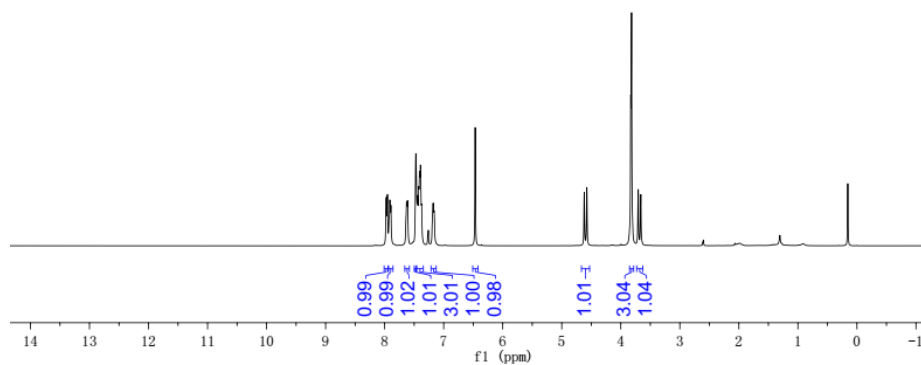

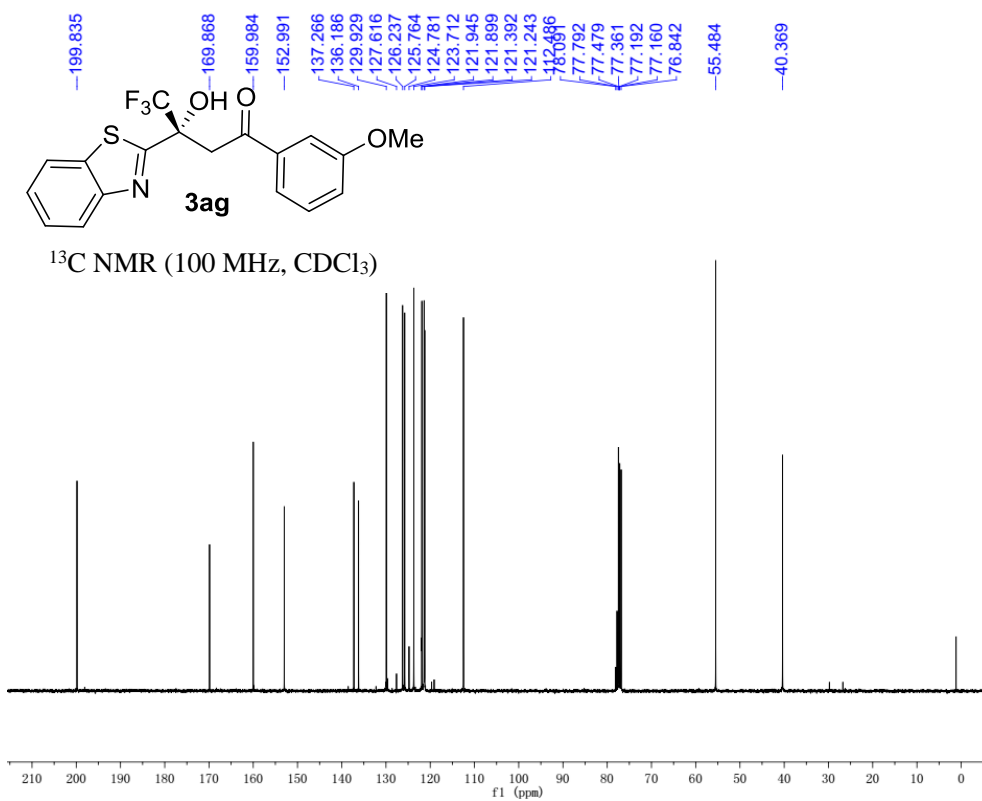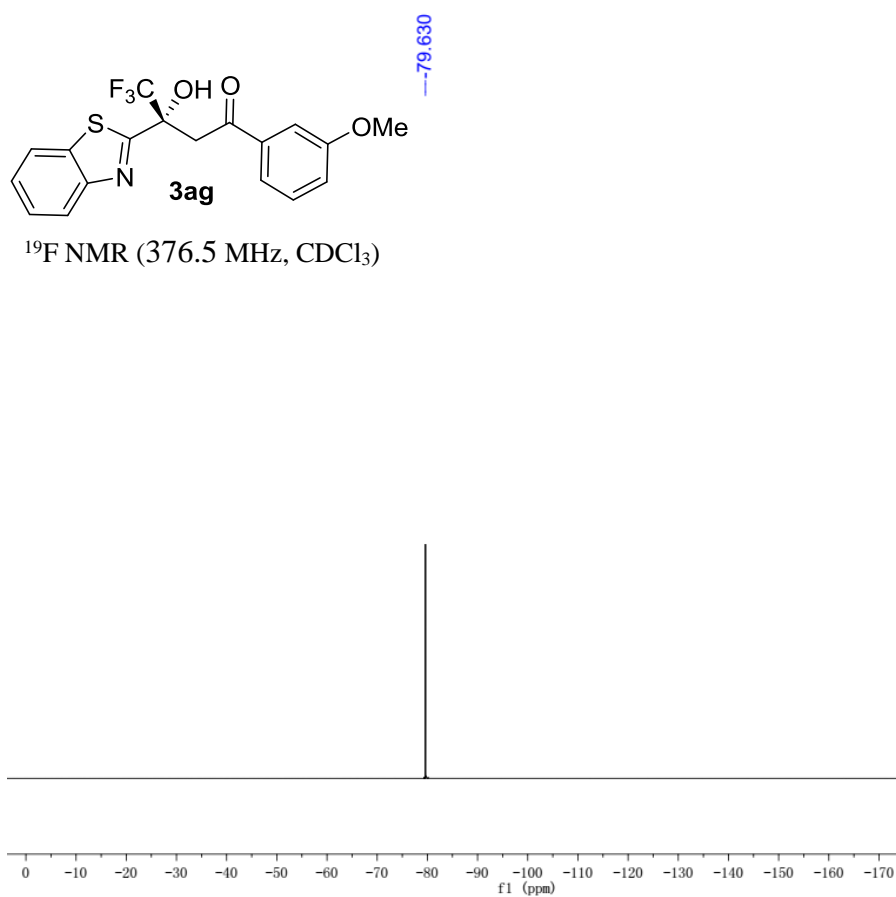

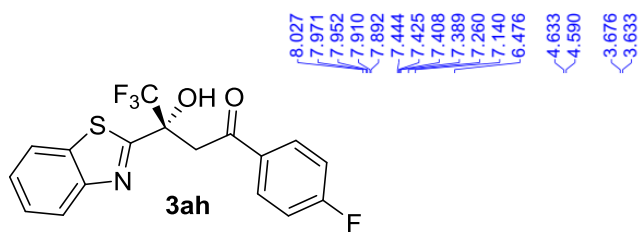

$^1\text{H NMR}$  (400 MHz,  $\text{CDCl}_3$ )

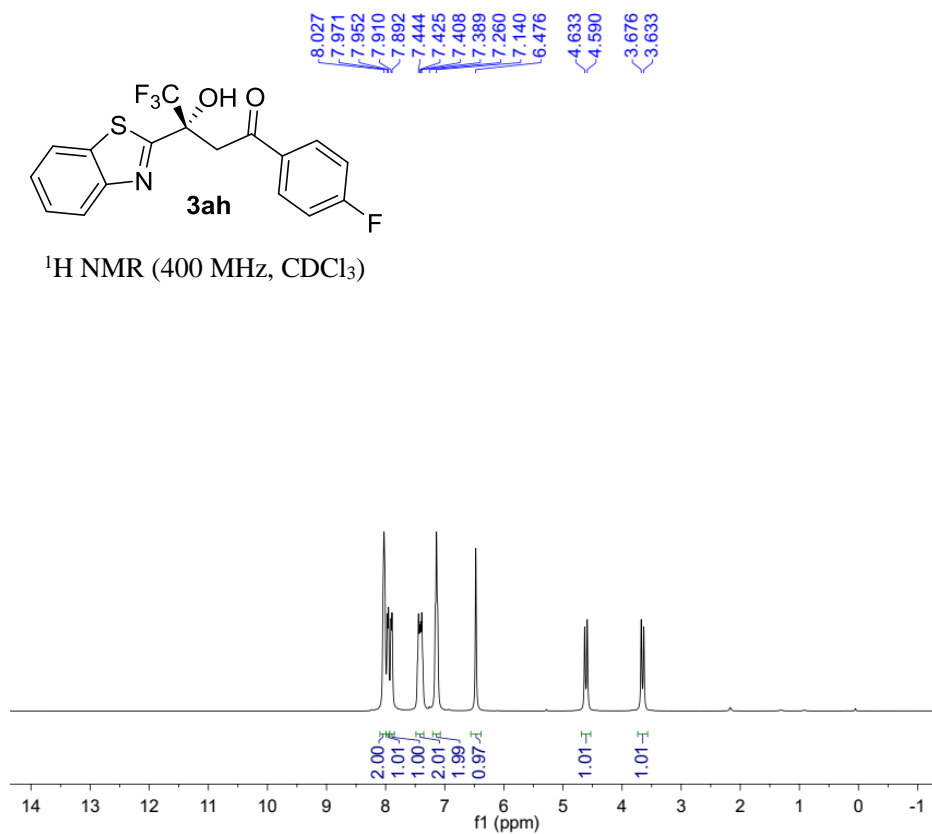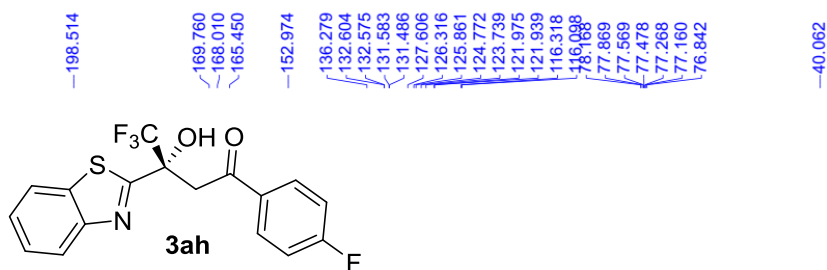

$^{13}\text{C NMR}$  (100 MHz,  $\text{CDCl}_3$ )

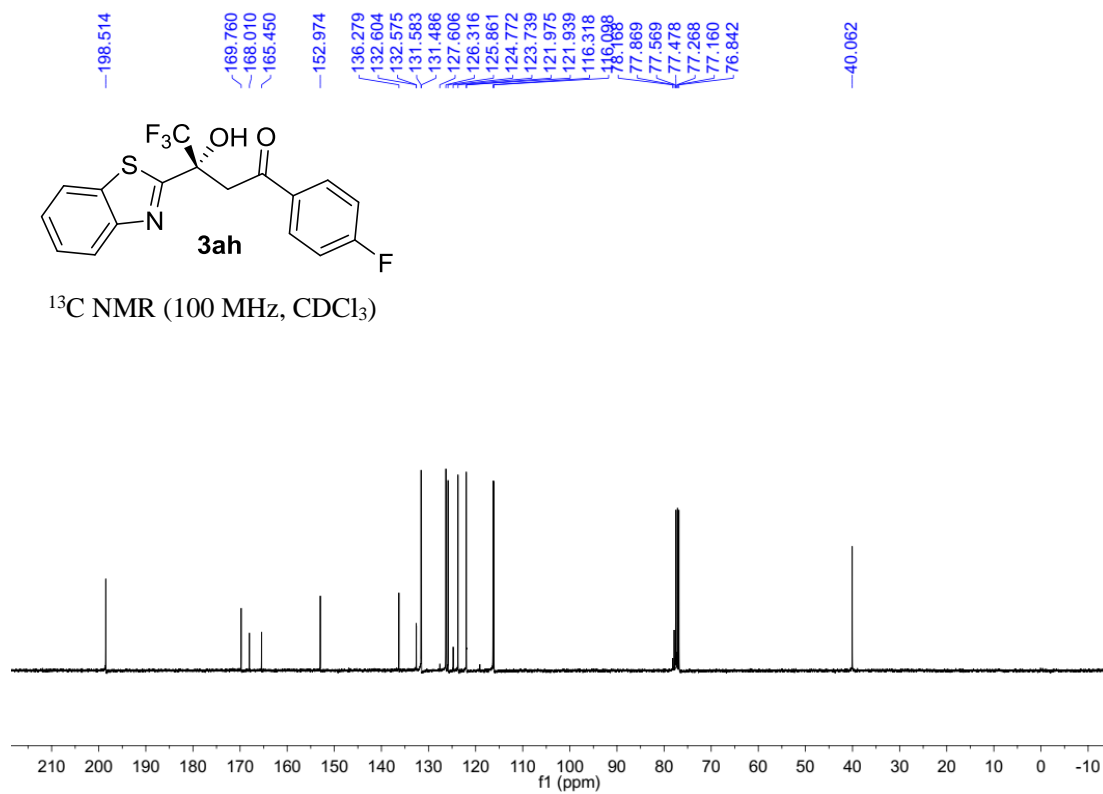

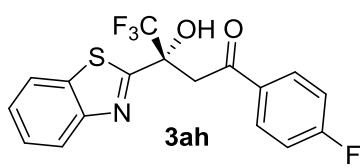

$^{19}\text{F}$  NMR (376.5 MHz,  $\text{CDCl}_3$ )

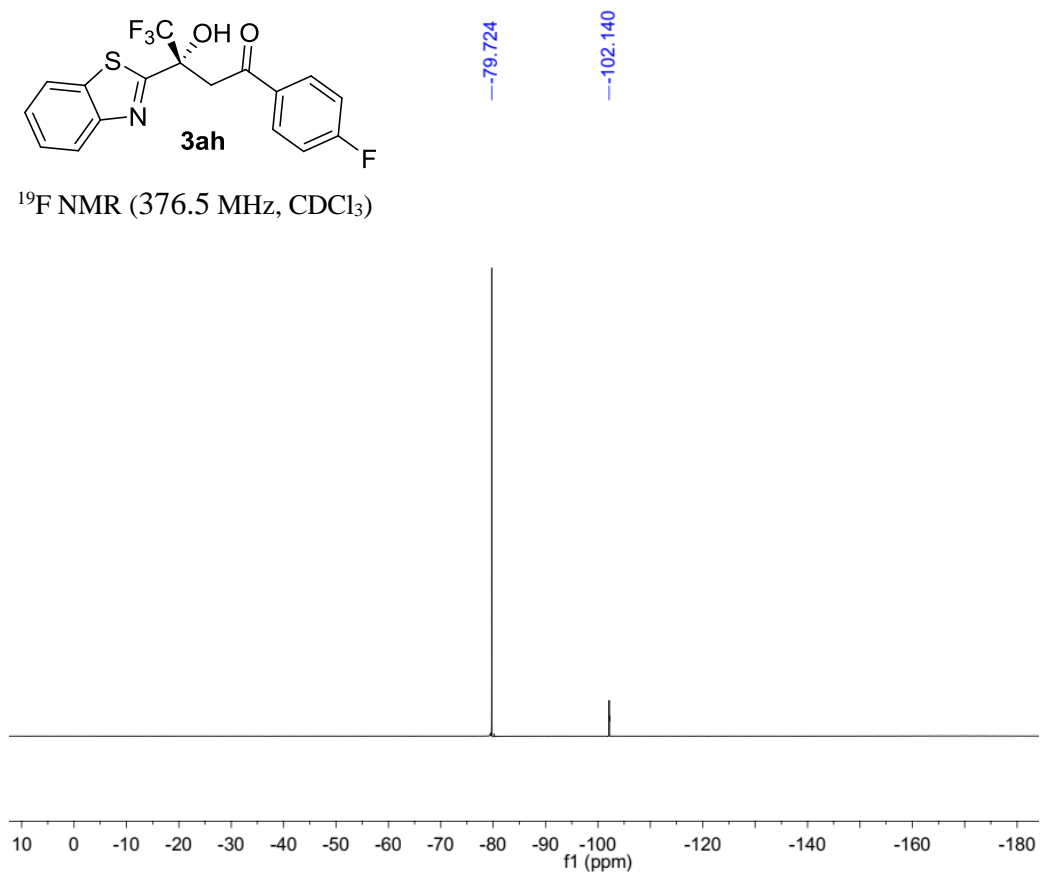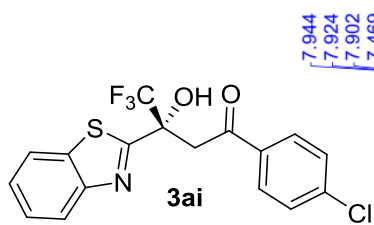

$^1\text{H}$  NMR (400 MHz,  $\text{CDCl}_3$ )

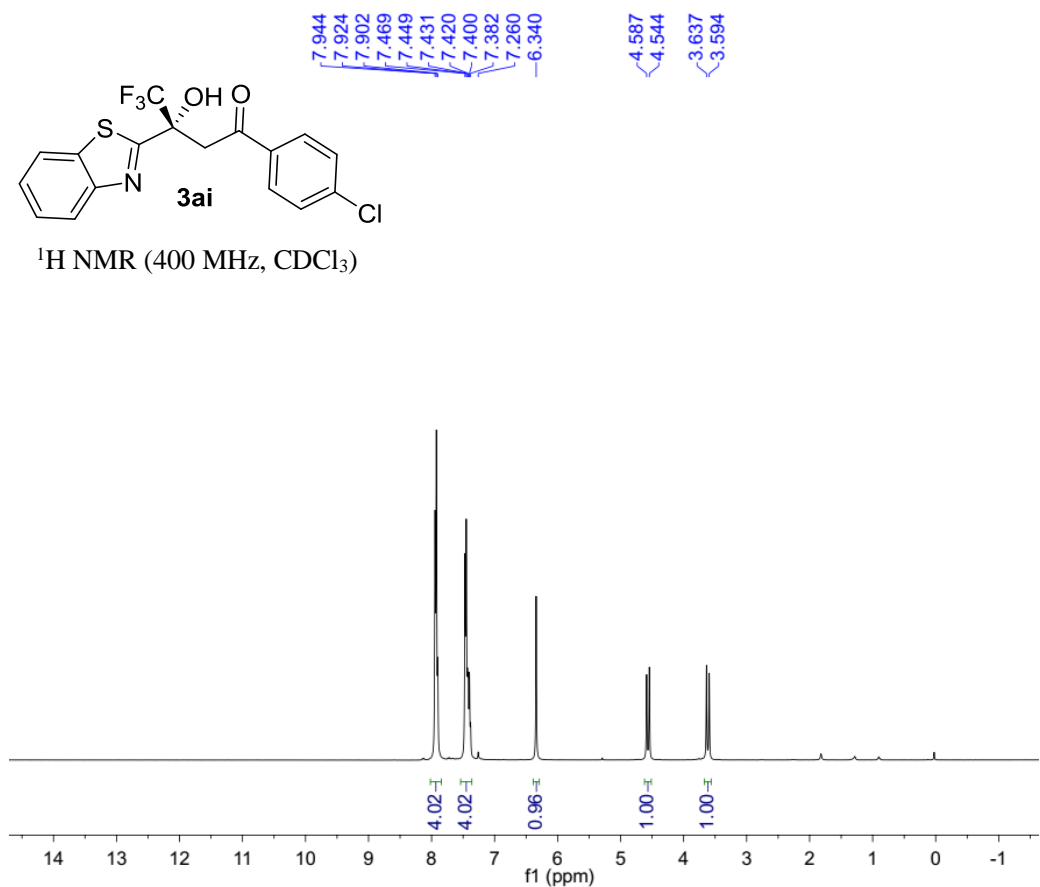

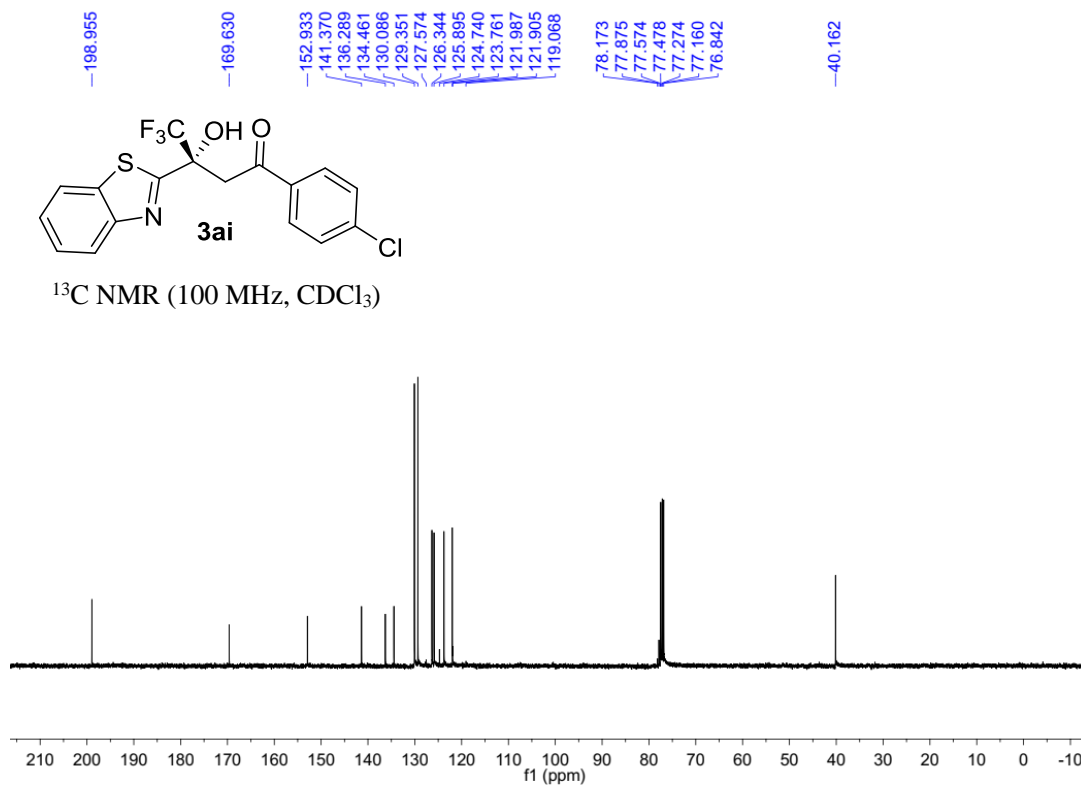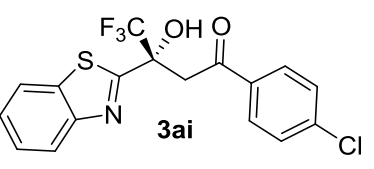

<sup>13</sup>C NMR (100 MHz, CDCl<sub>3</sub>)

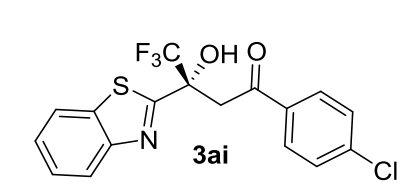

<sup>19</sup>F NMR (376.5 MHz, CDCl<sub>3</sub>)

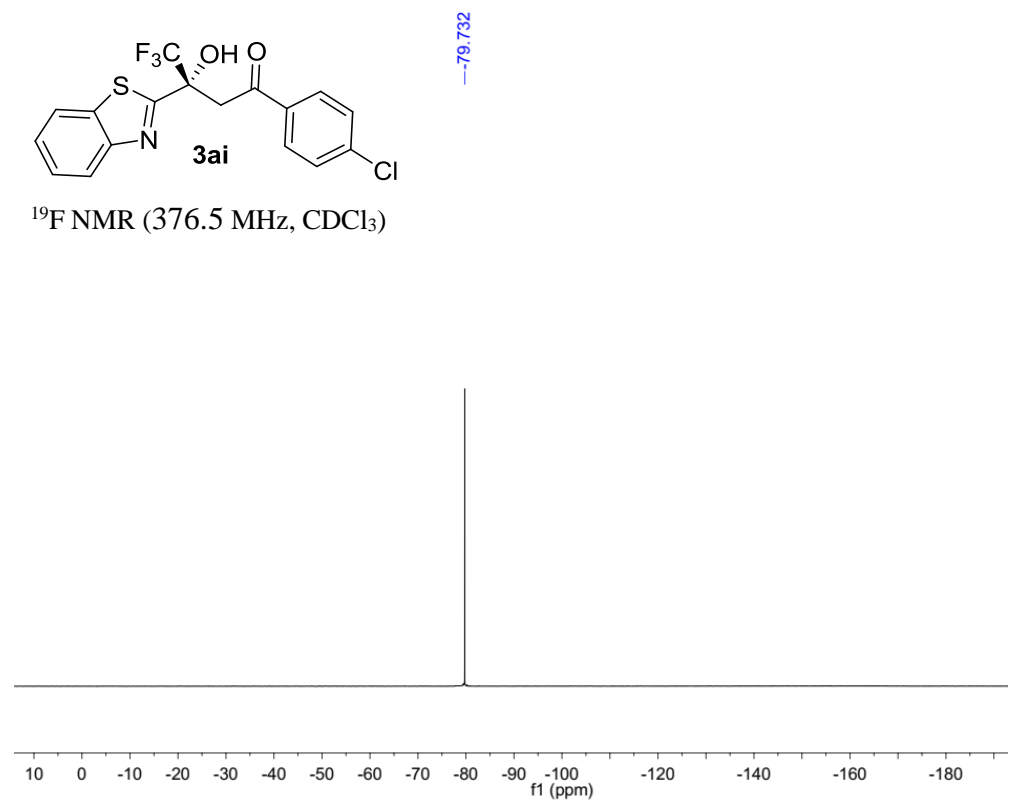

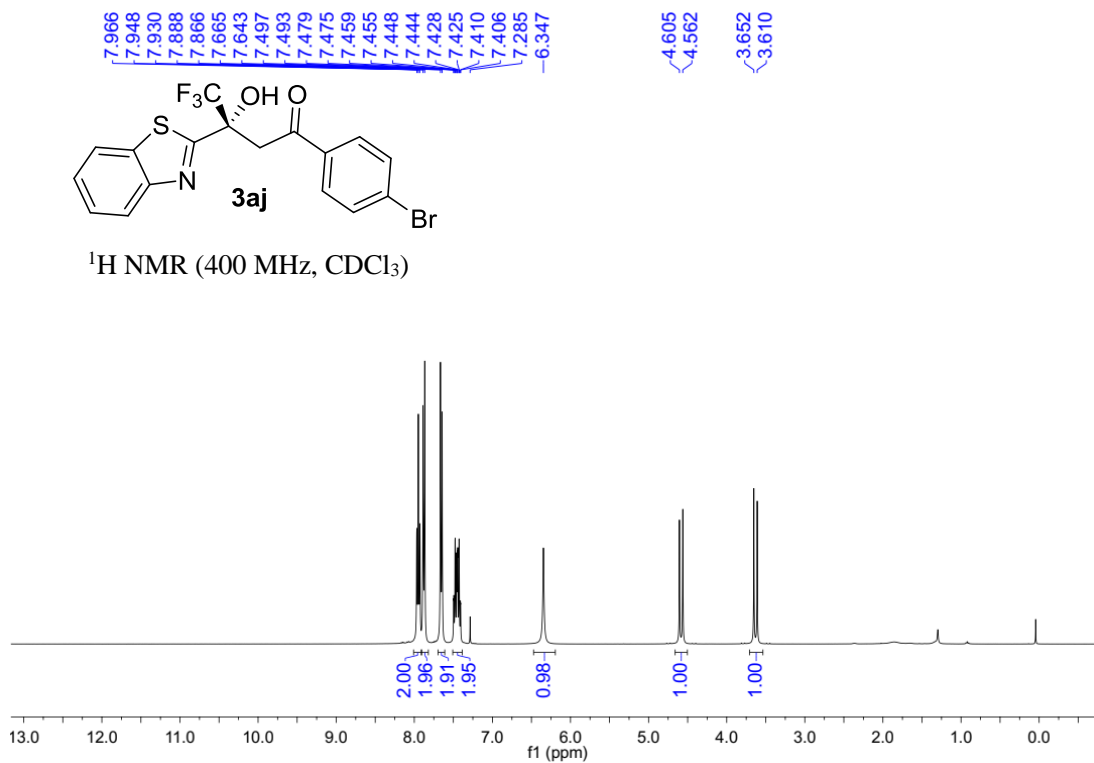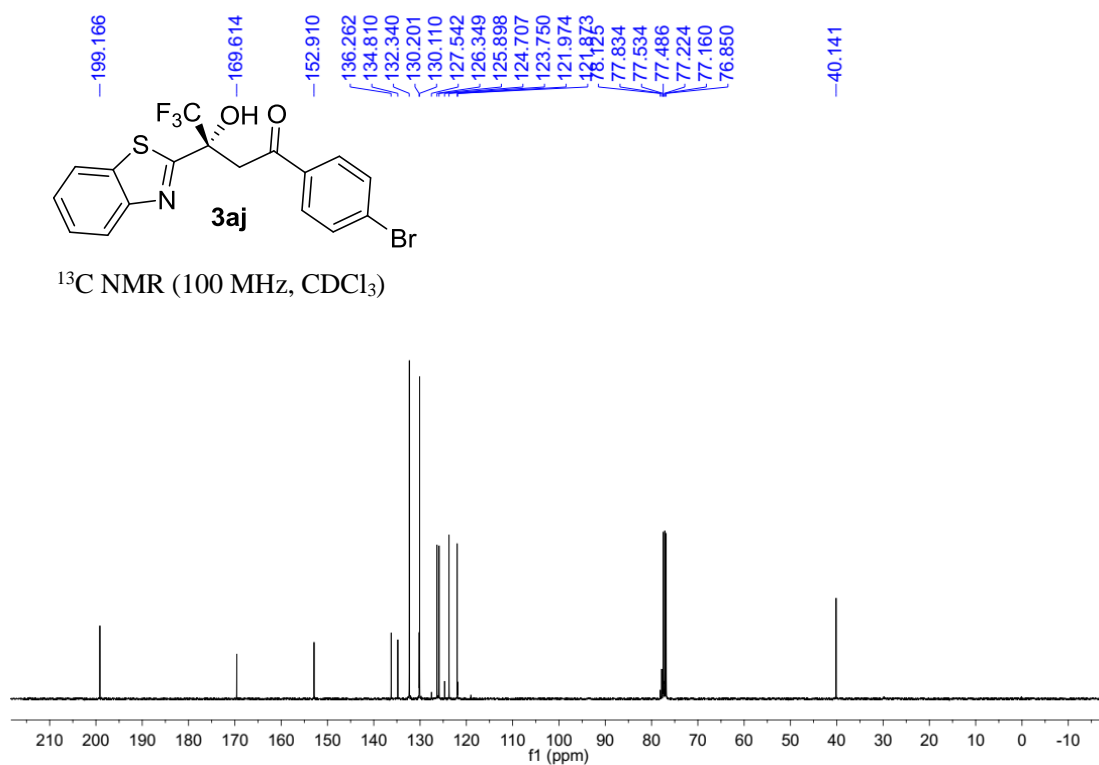



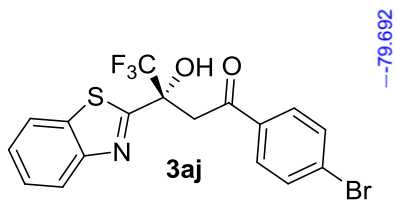

$^{19}\text{F}$  NMR (376.5 MHz,  $\text{CDCl}_3$ )

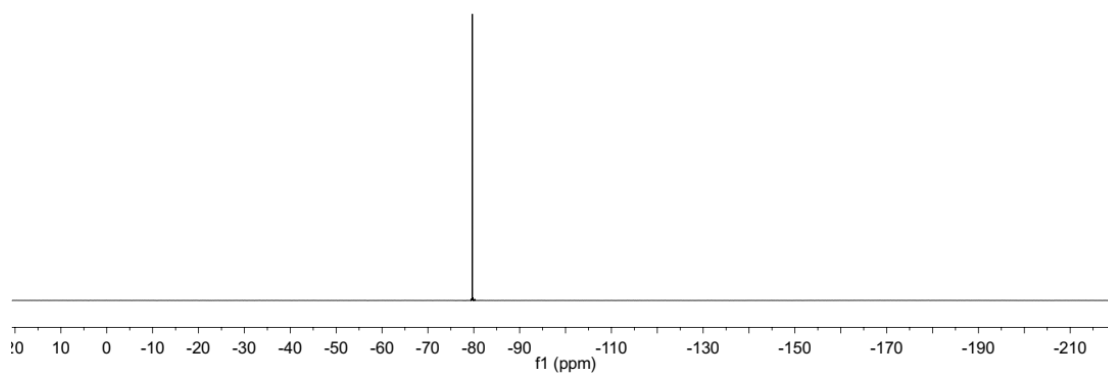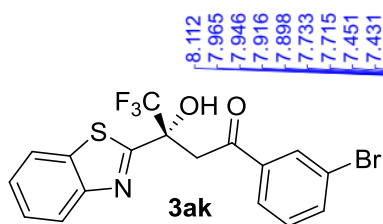

$^1\text{H}$  NMR (400 MHz,  $\text{CDCl}_3$ )

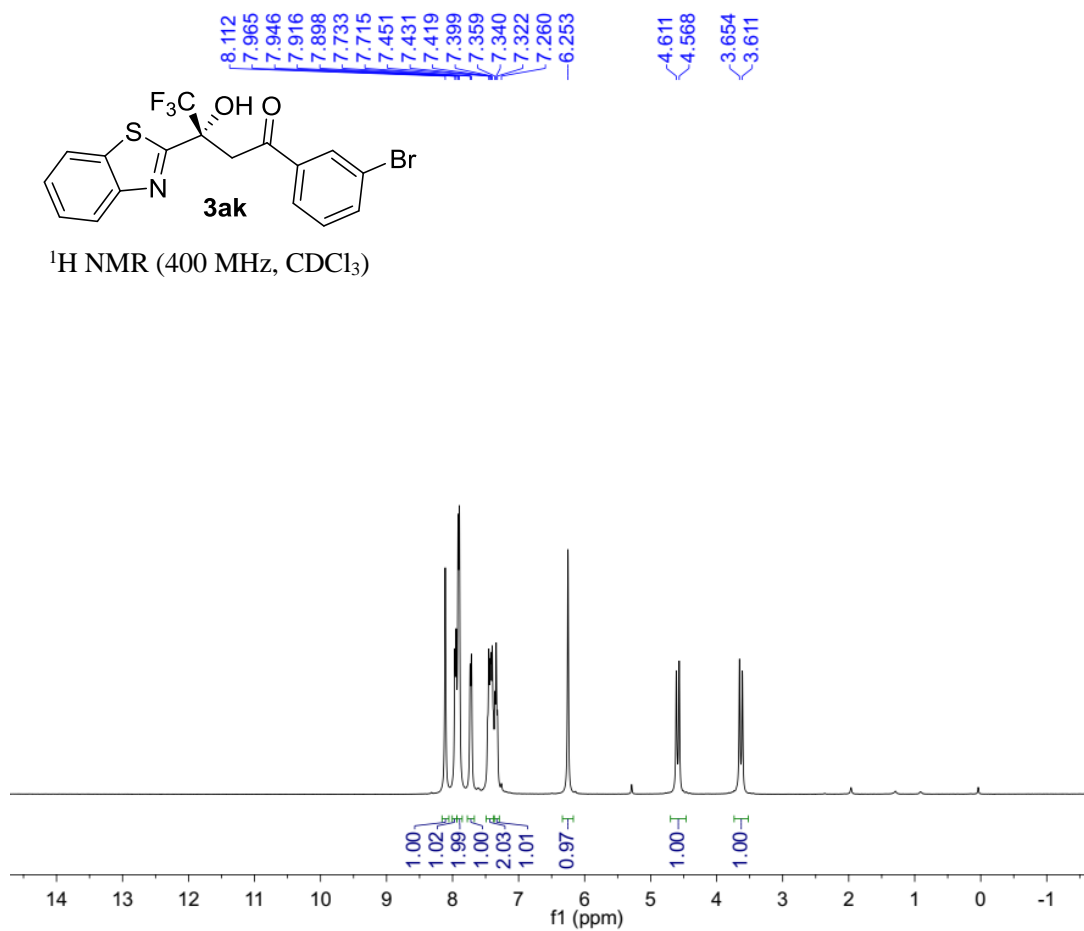

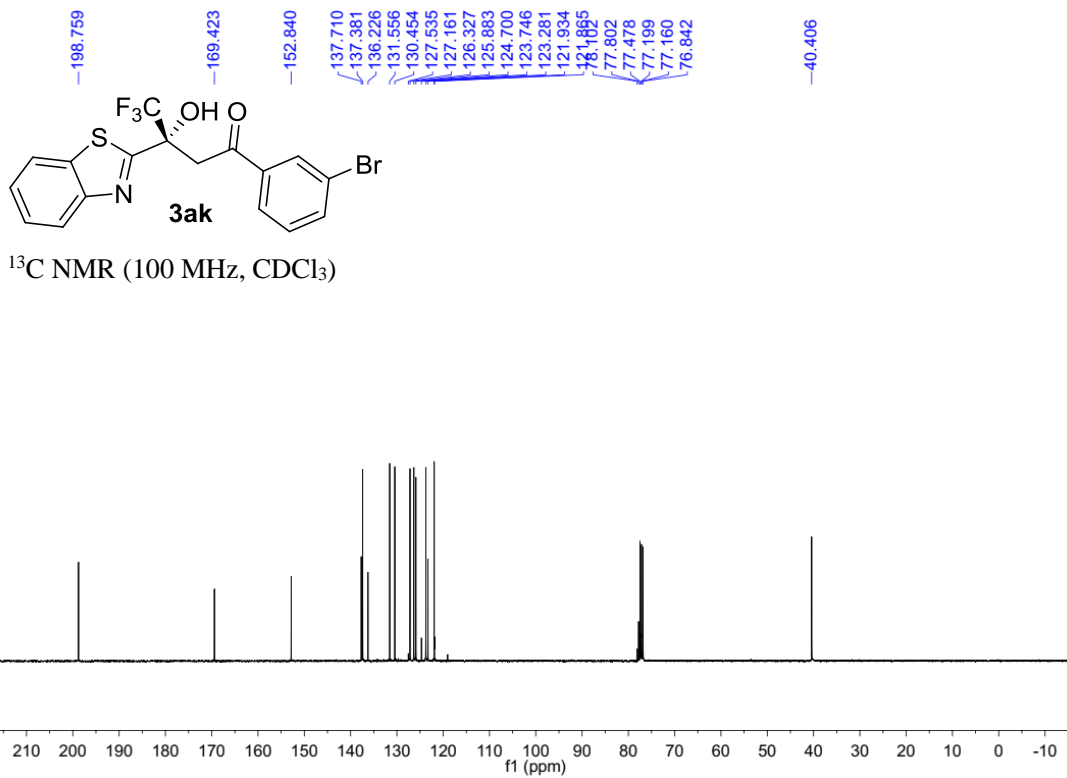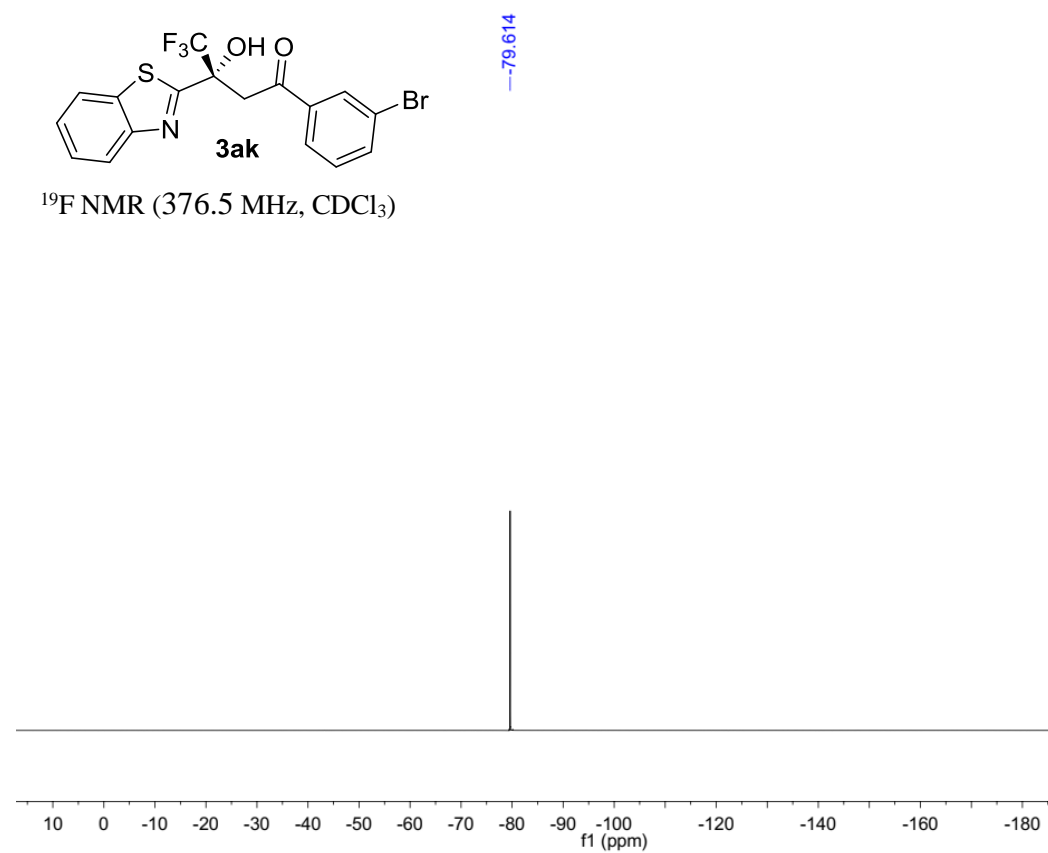

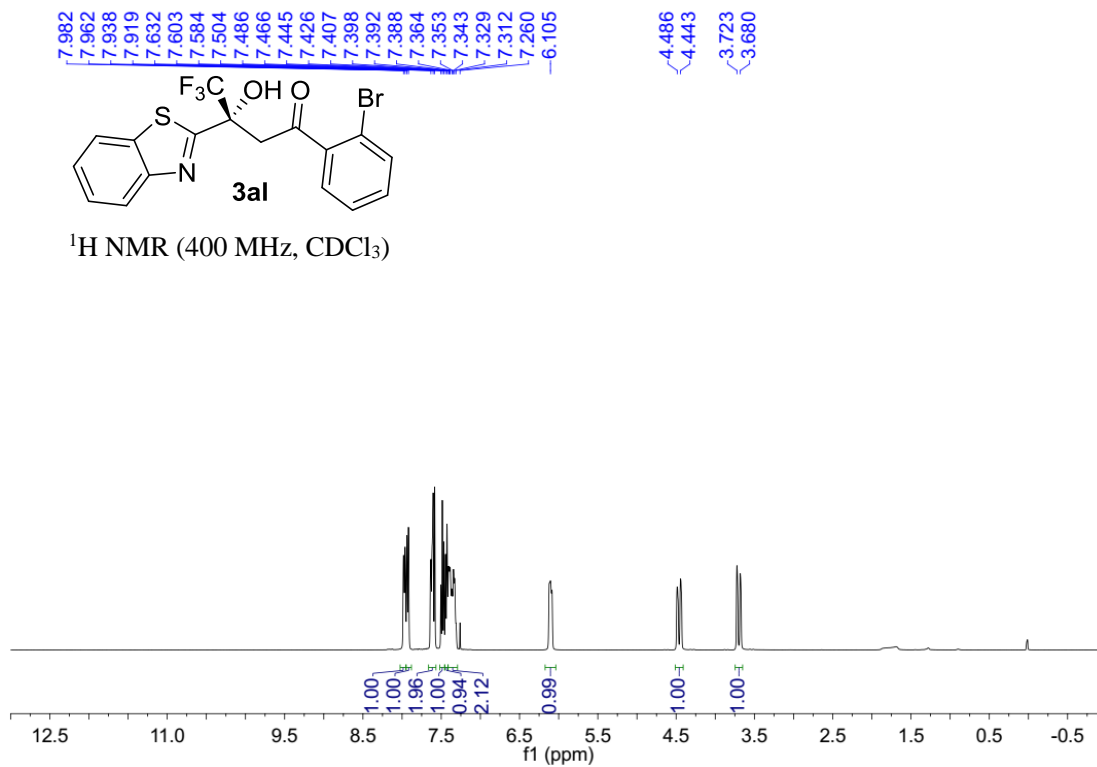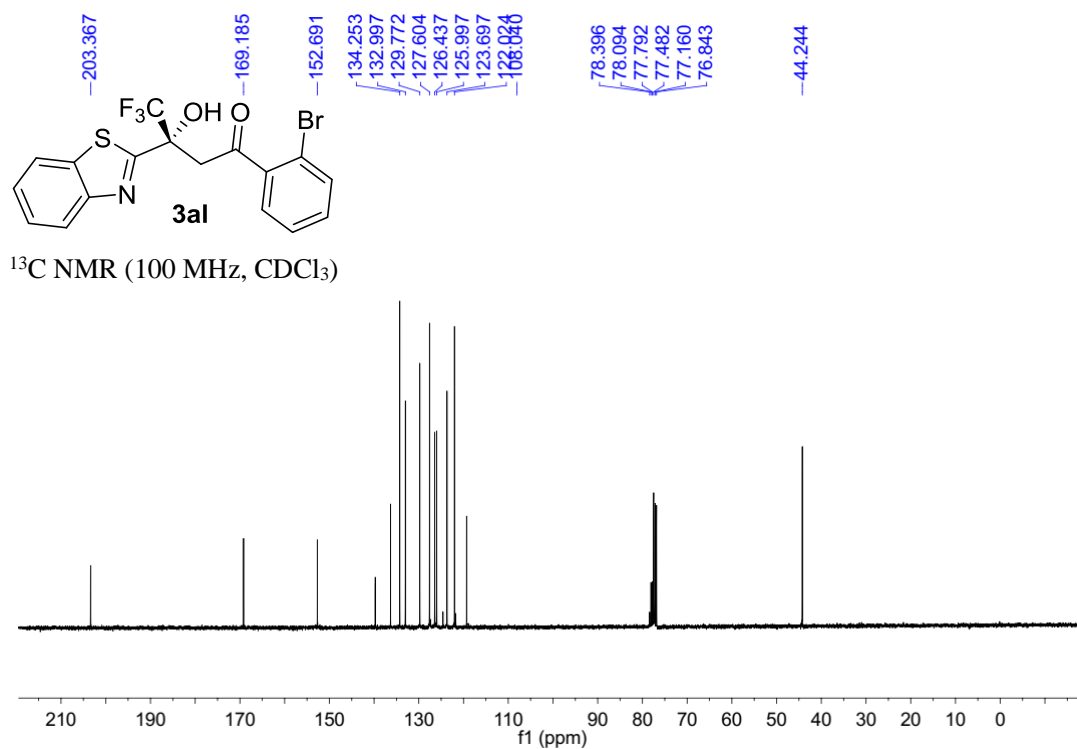

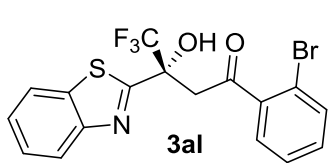

$^{19}\text{F}$  NMR (376.5 MHz,  $\text{CDCl}_3$ )

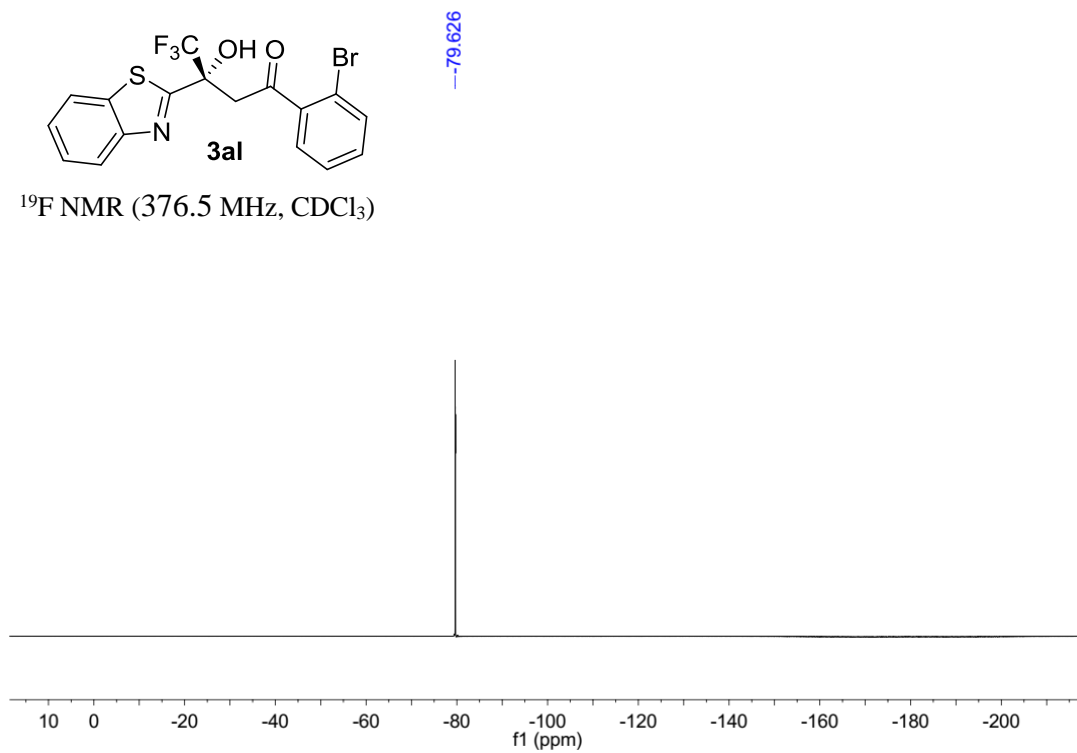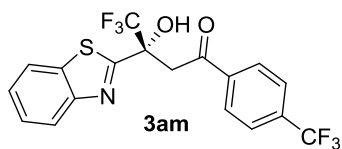

$^1\text{H}$  NMR (400 MHz,  $\text{CDCl}_3$ )

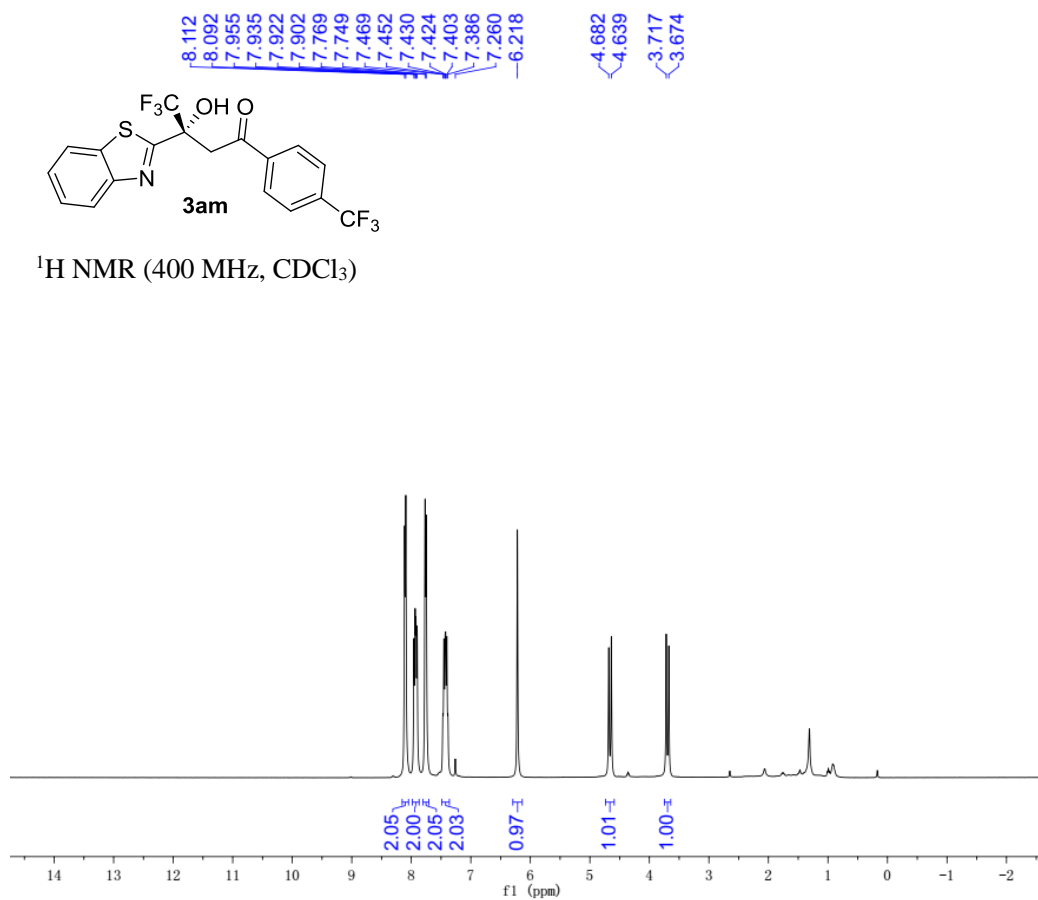

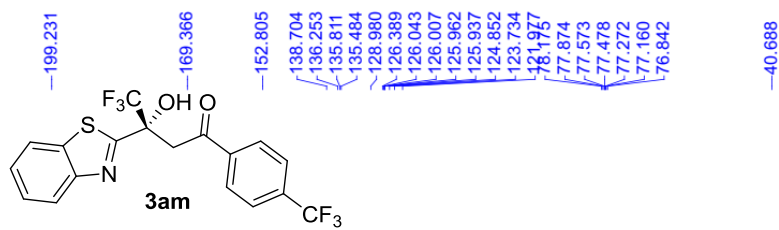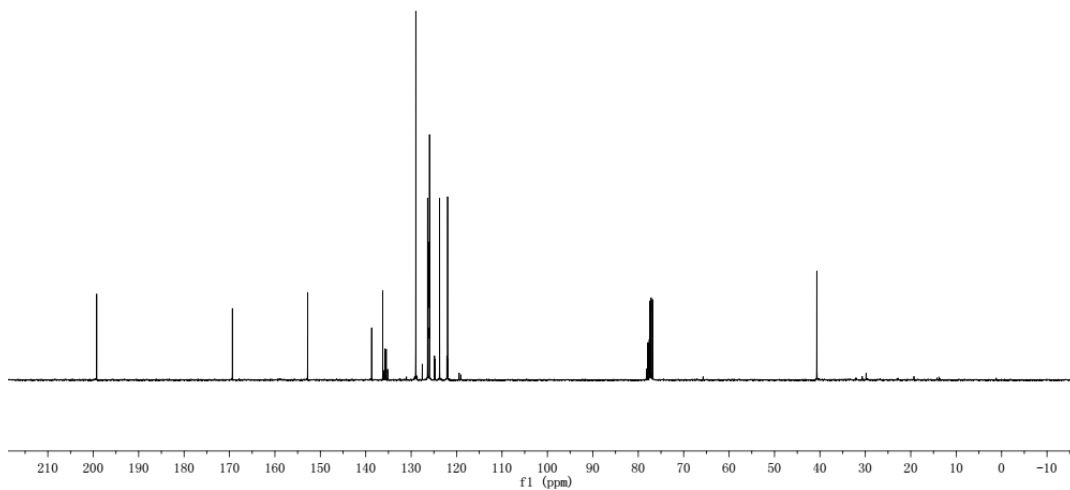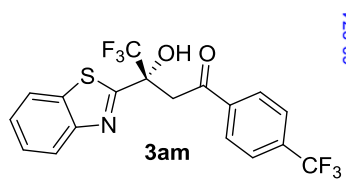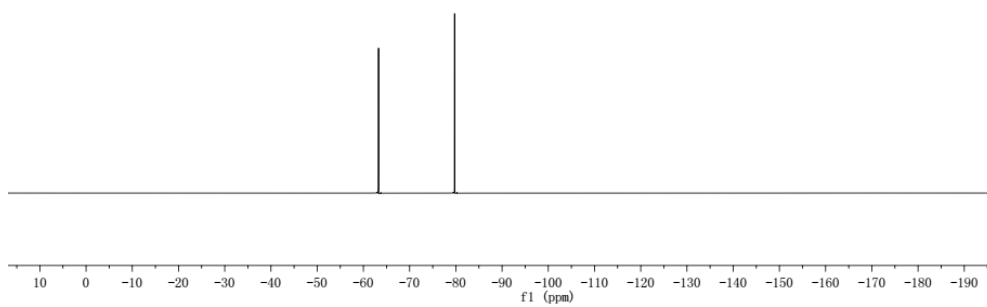

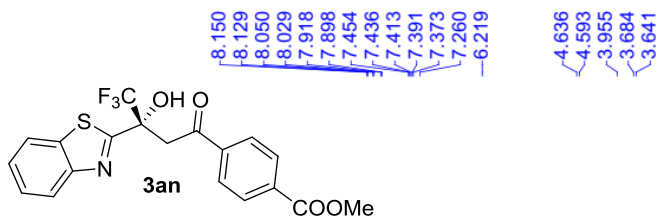

$^1\text{H}$  NMR (400 MHz,  $\text{CDCl}_3$ )

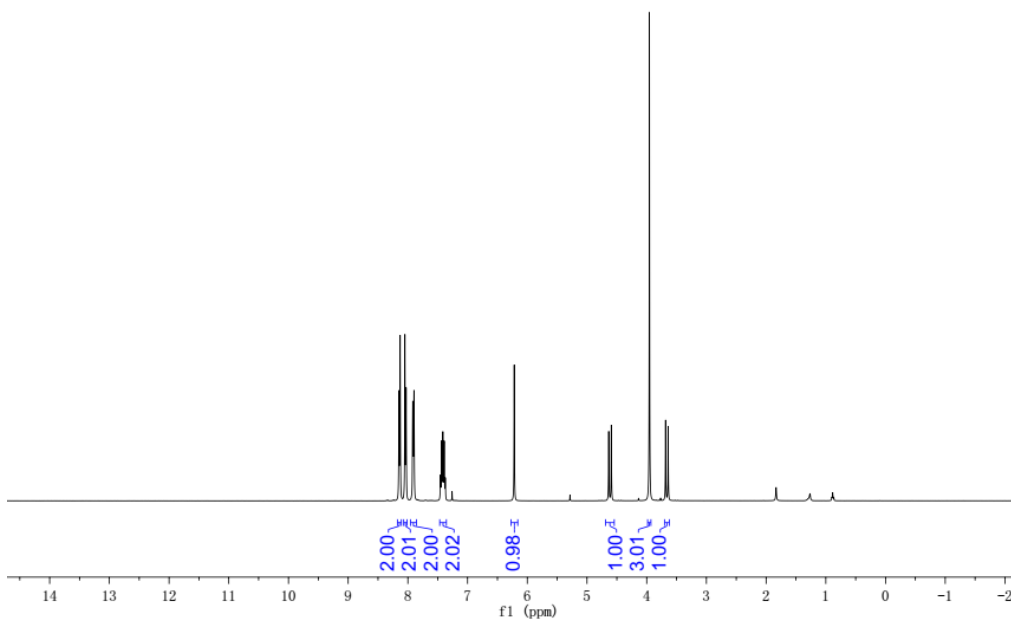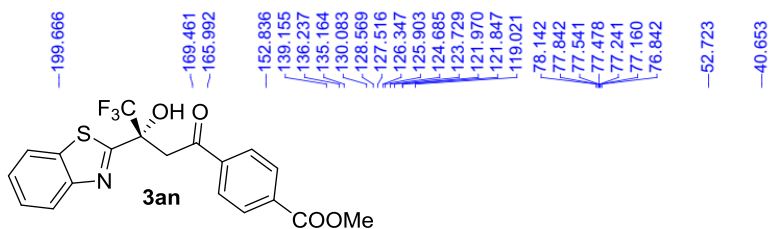

$^{13}\text{C}$  NMR (100 MHz,  $\text{CDCl}_3$ )

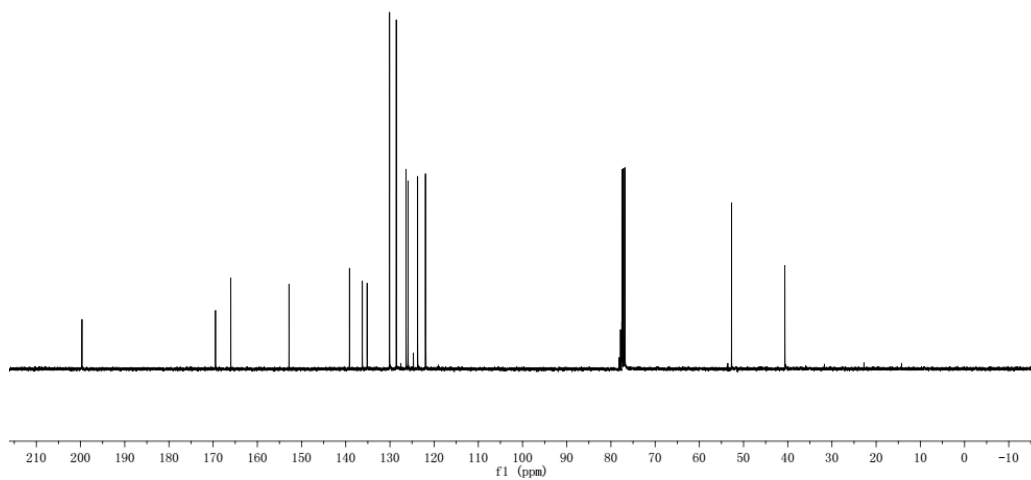

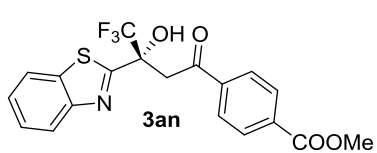

---79.737

<sup>19</sup>F NMR (376.5 MHz, CDCl<sub>3</sub>)

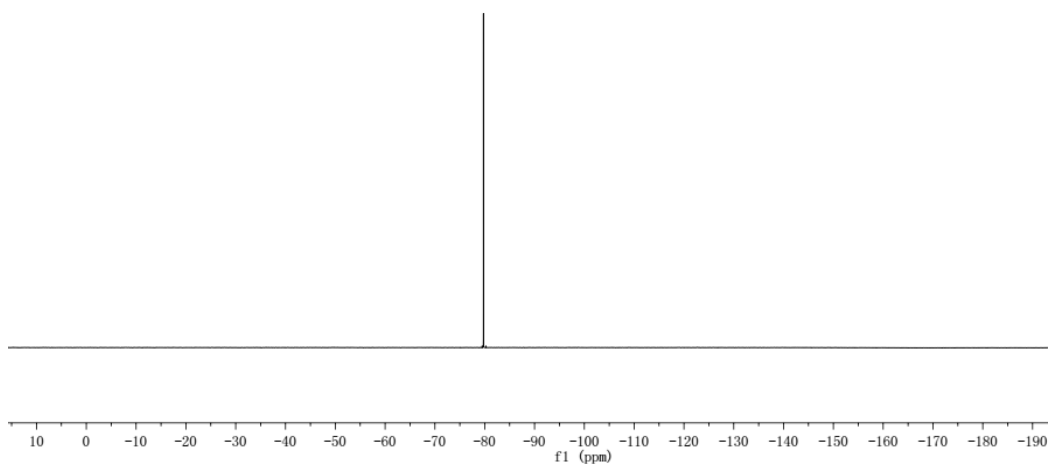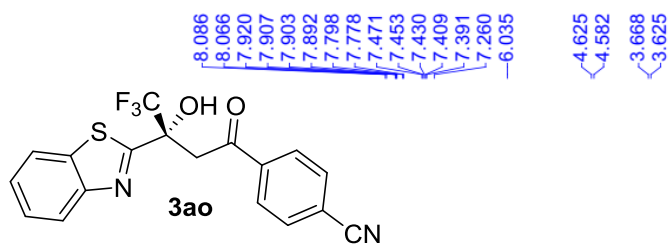

<sup>1</sup>H NMR (400 MHz, CDCl<sub>3</sub>)

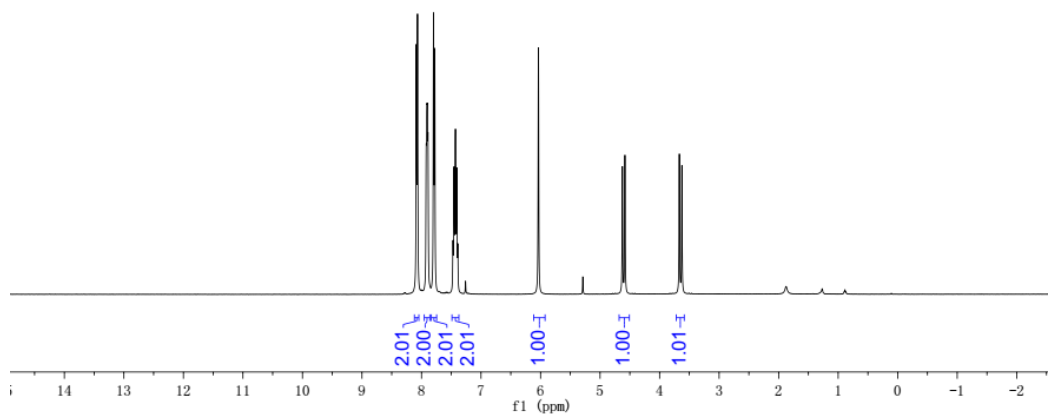

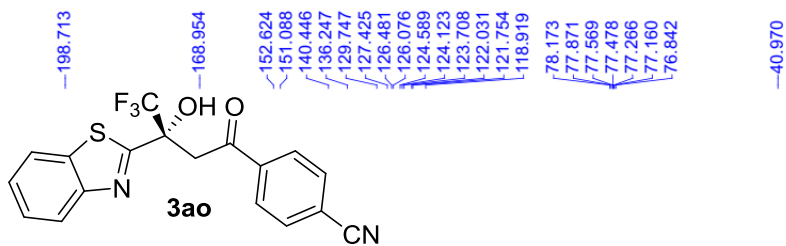

$^{13}\text{C}$  NMR (100 MHz,  $\text{CDCl}_3$ )

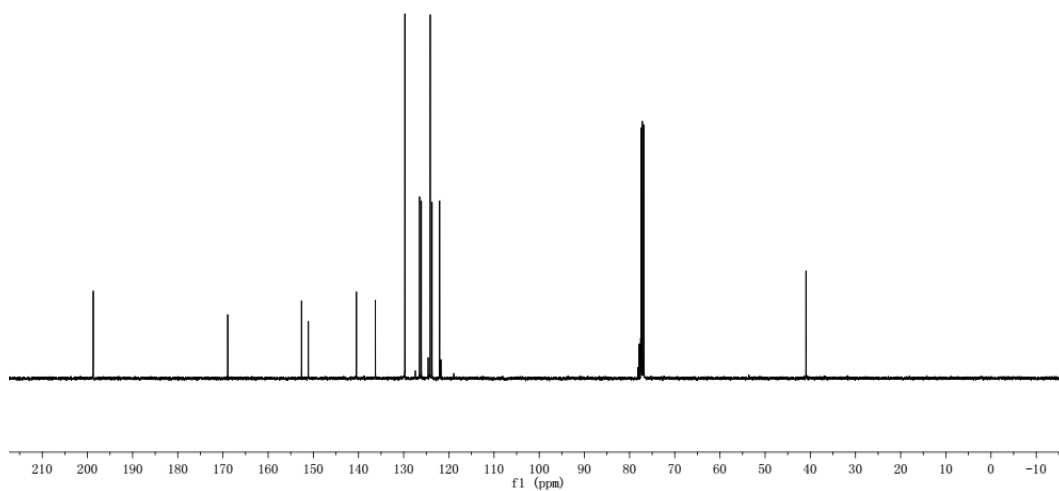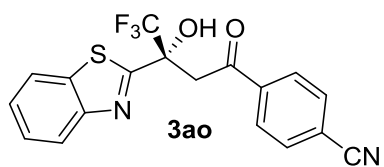

$^{19}\text{F}$  NMR (376.5 MHz,  $\text{CDCl}_3$ )

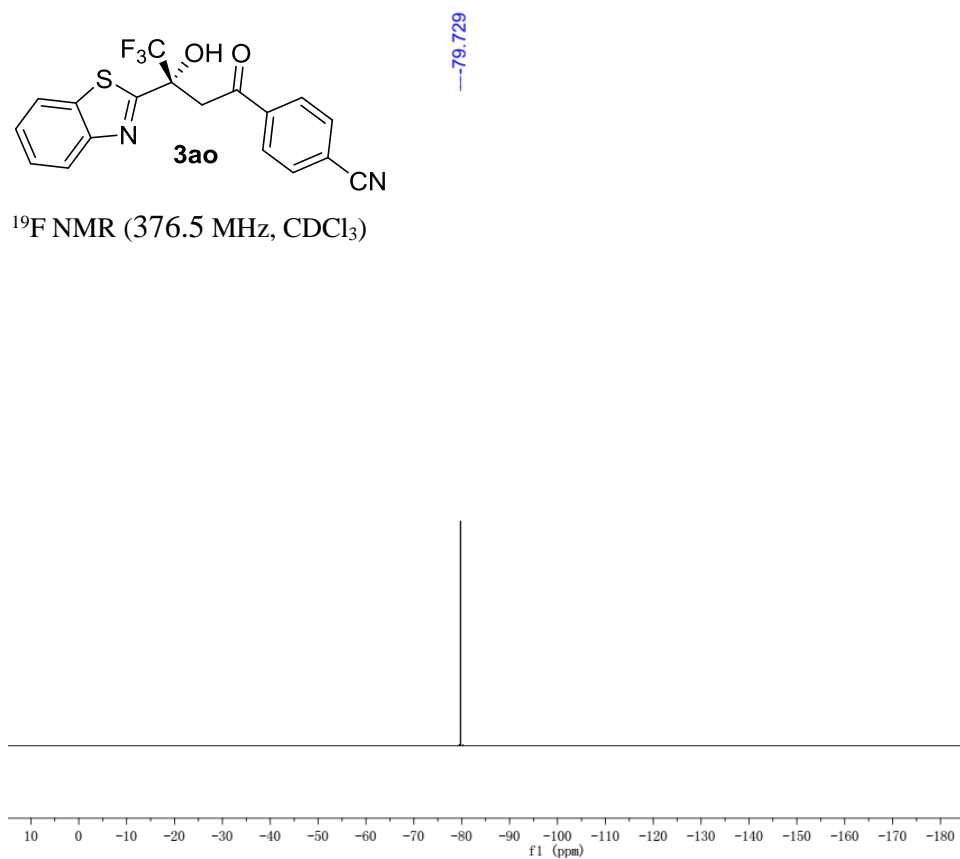



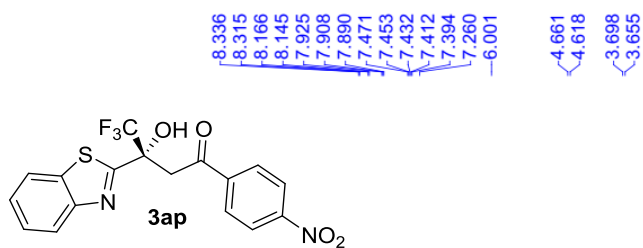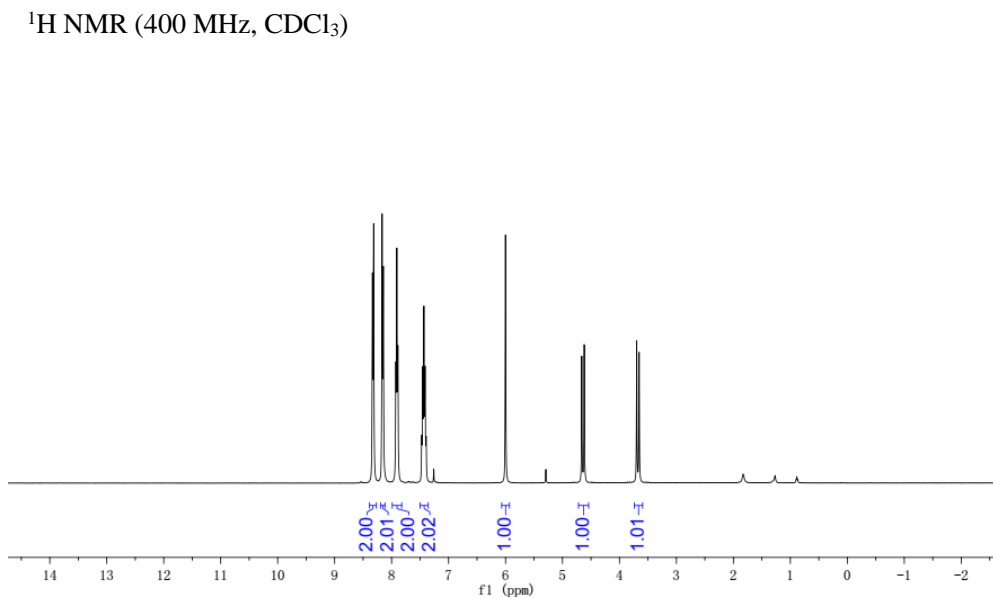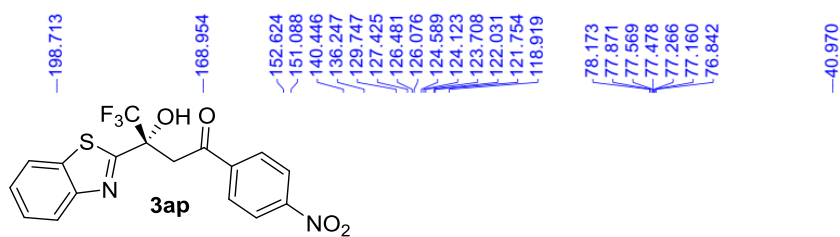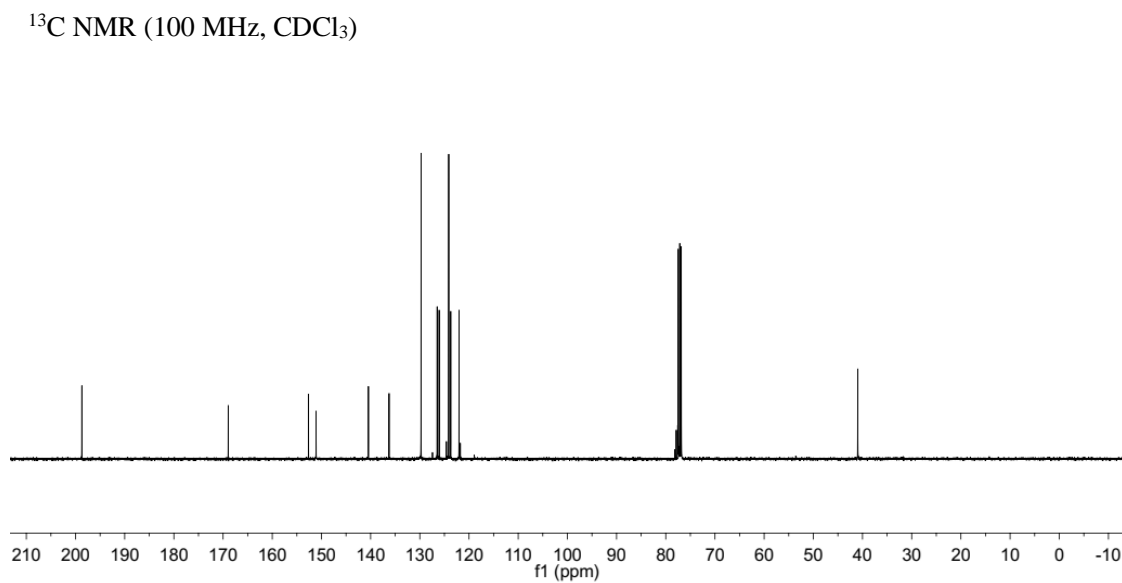

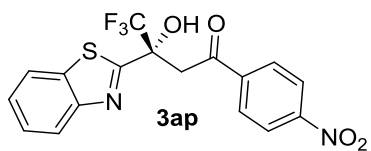

$^{19}\text{F}$  NMR (376.5 MHz,  $\text{CDCl}_3$ )

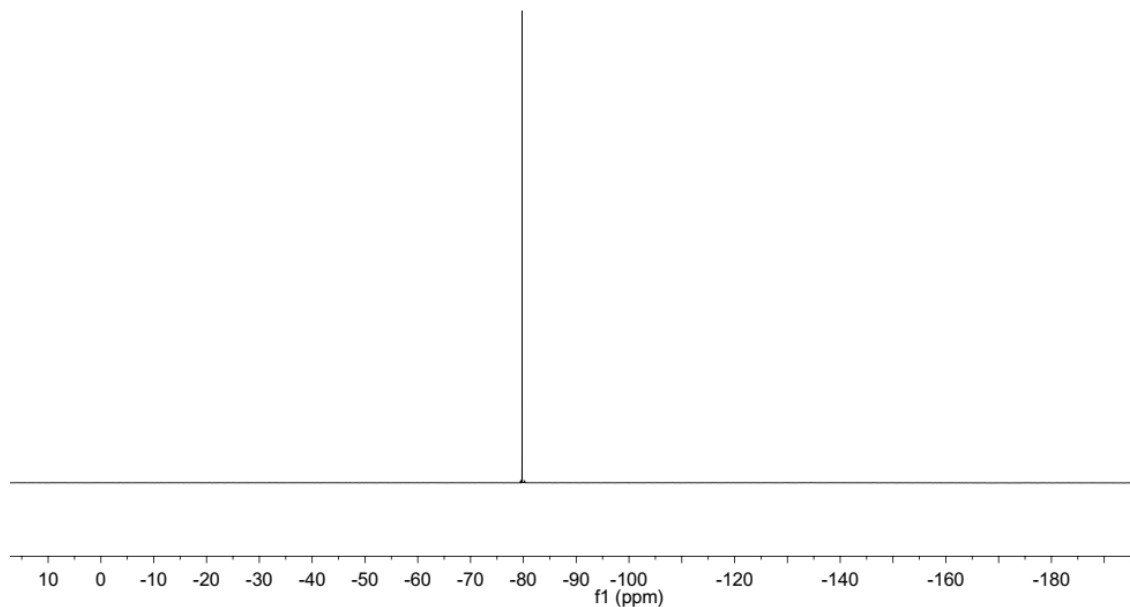

8.465  
 8.456  
 8.450  
 8.441  
 8.213  
 8.195  
 8.062  
 8.042  
 7.947  
 7.927  
 7.873  
 7.863  
 7.587  
 7.583  
 7.565  
 7.543  
 7.538  
 7.534  
 7.530  
 7.525  
 7.522  
 7.514  
 7.473  
 7.454  
 7.434  
 7.430  
 7.411  
 7.392  
 7.260  
 6.629  
 4.677  
 4.634  
 3.767  
 3.725

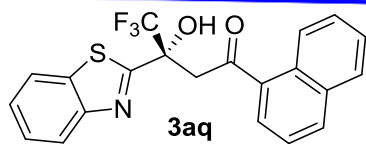

$^1\text{H}$  NMR (400 MHz,  $\text{CDCl}_3$ )

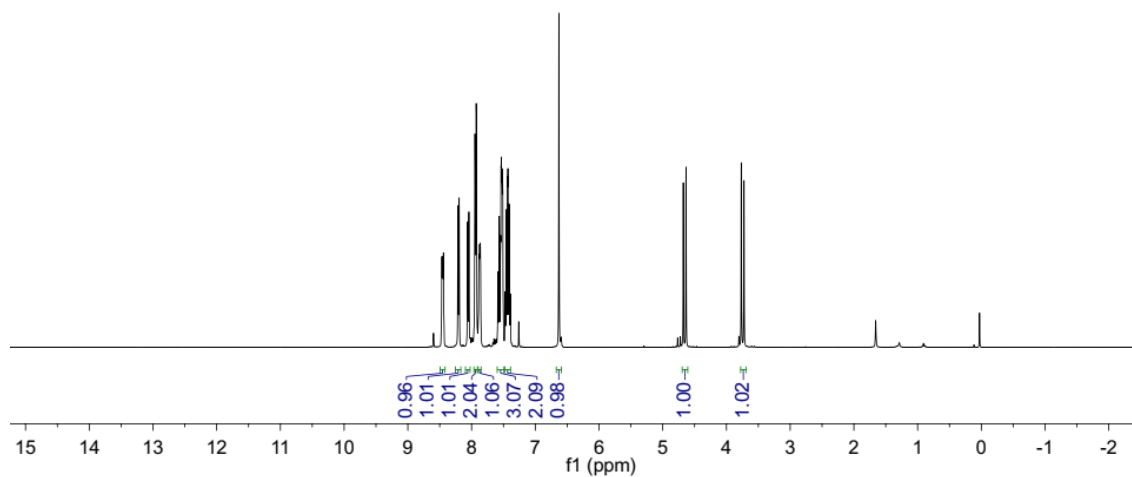

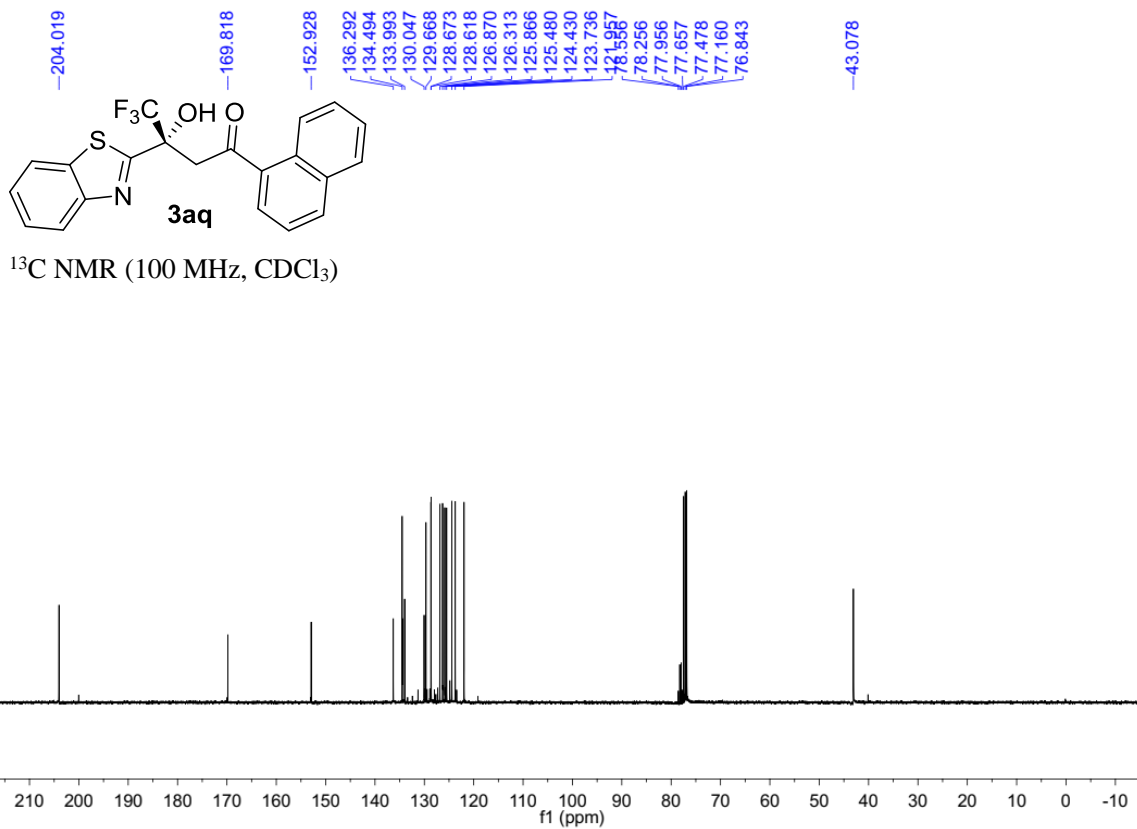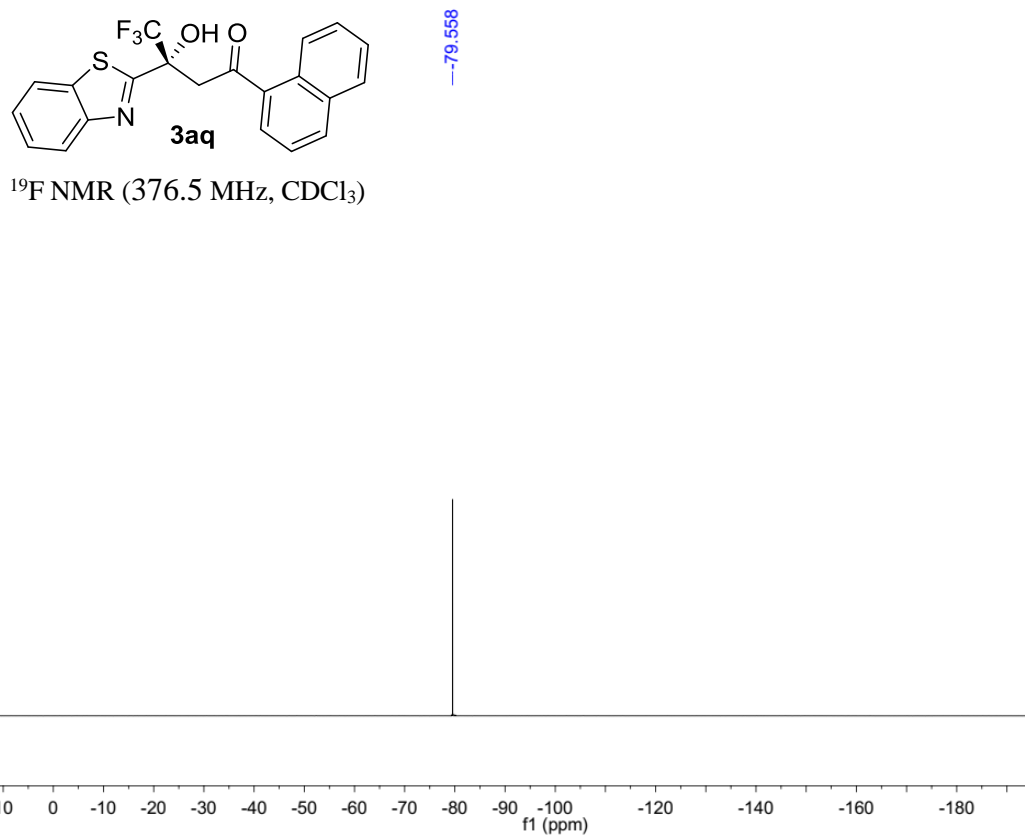

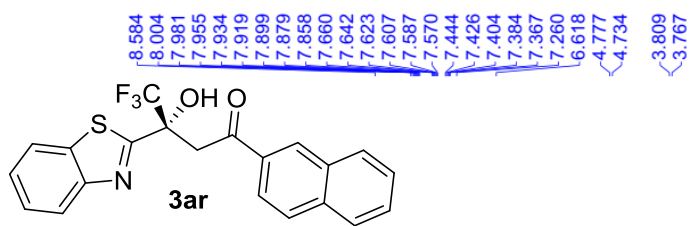

$^1\text{H}$  NMR (400 MHz,  $\text{CDCl}_3$ )

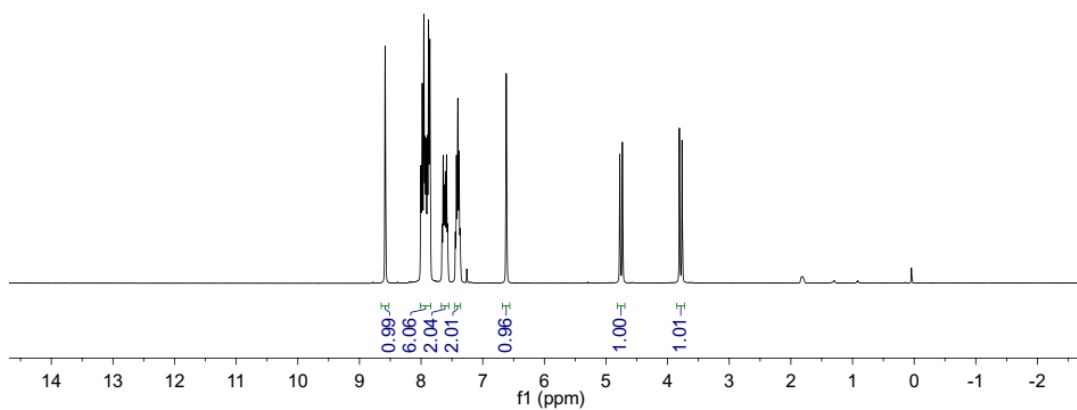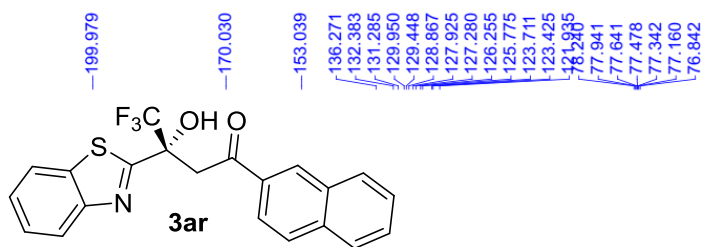

$^{13}\text{C}$  NMR (100 MHz,  $\text{CDCl}_3$ )

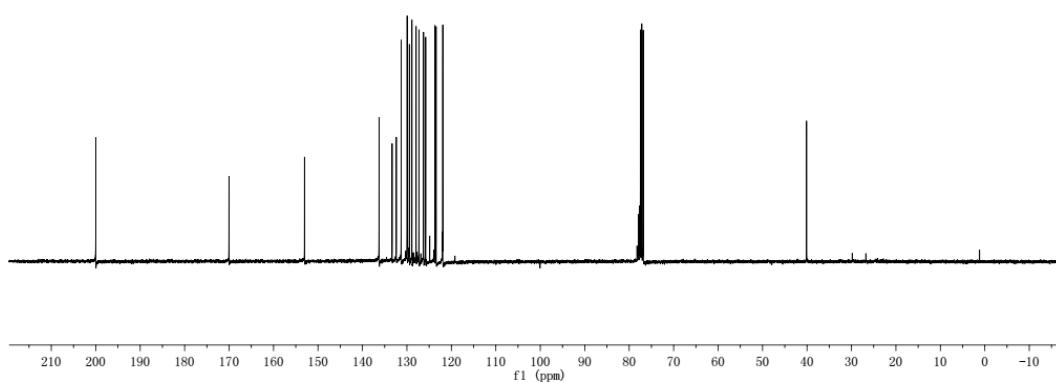

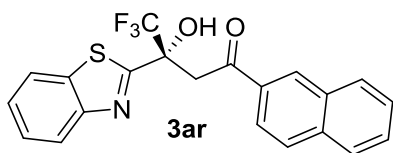

$^{19}\text{F}$  NMR (376.5 MHz,  $\text{CDCl}_3$ )

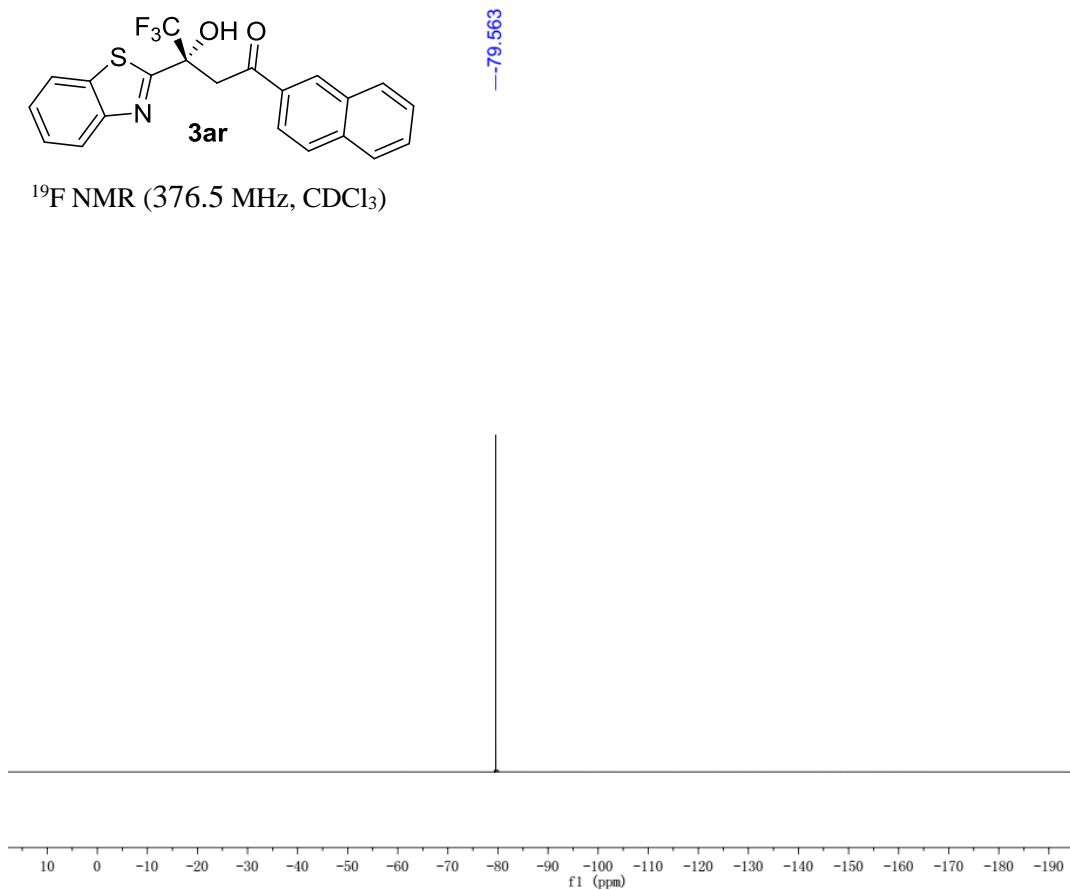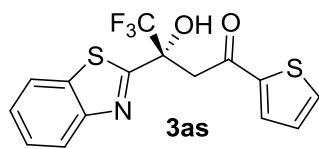

$^1\text{H}$  NMR (400 MHz,  $\text{CDCl}_3$ )

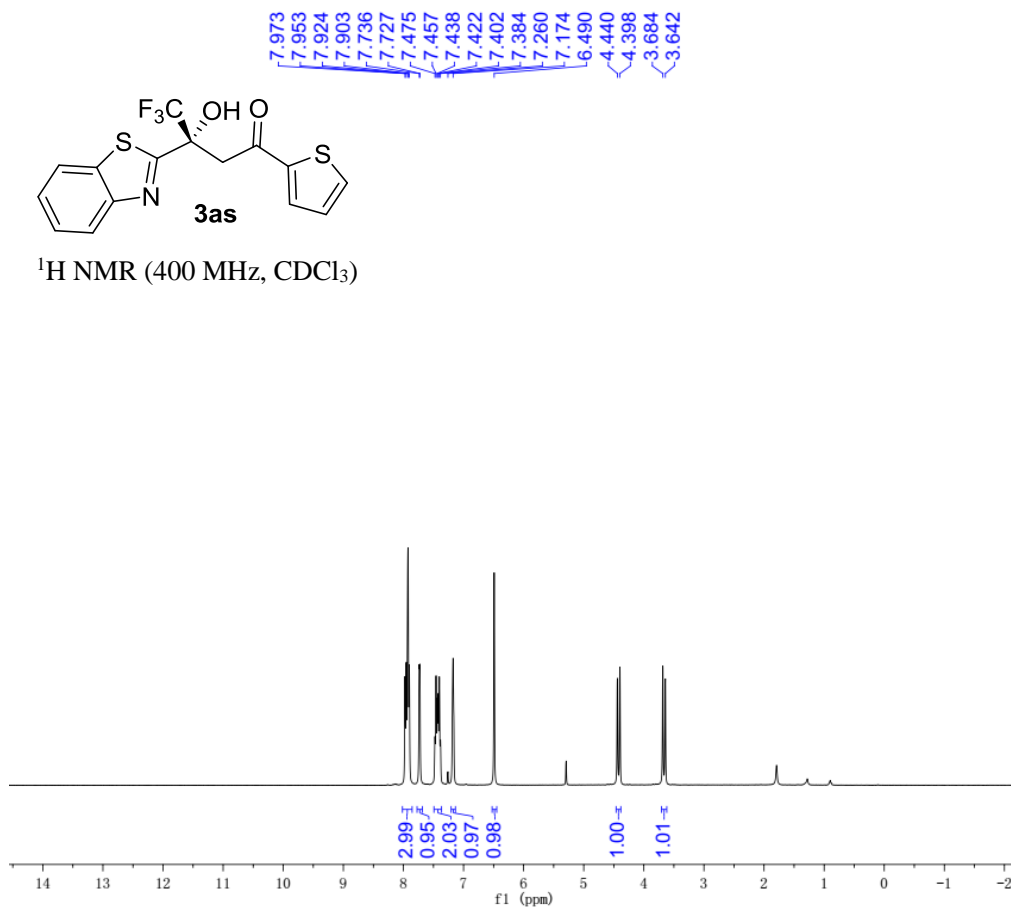

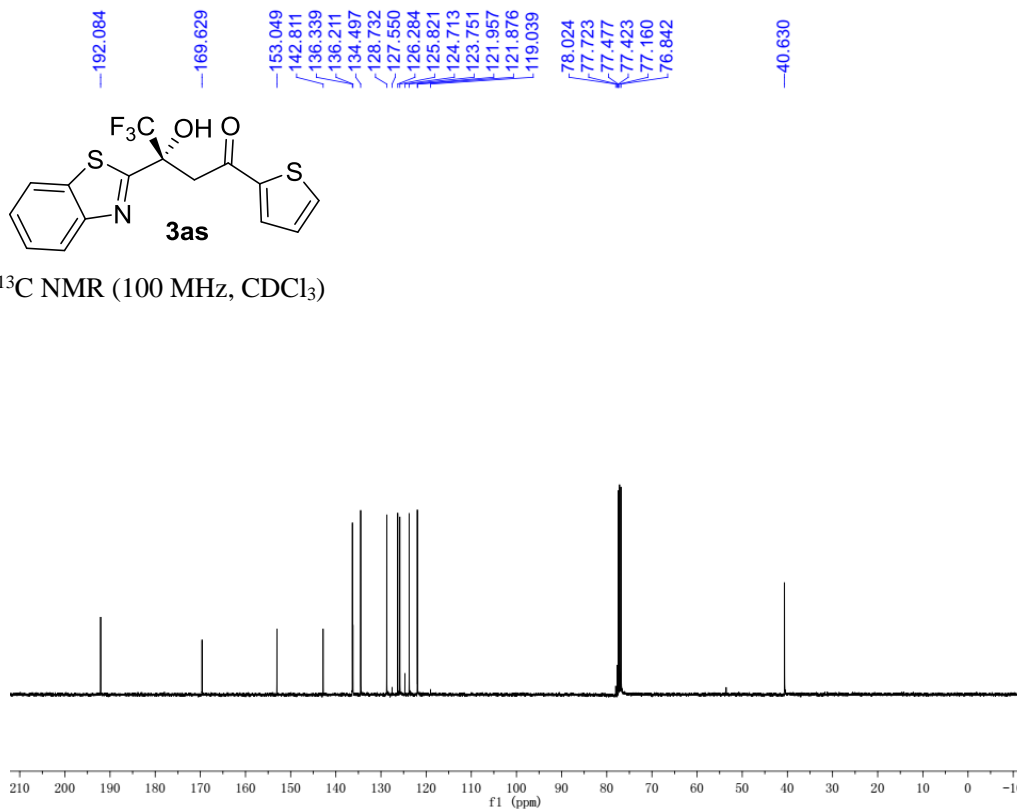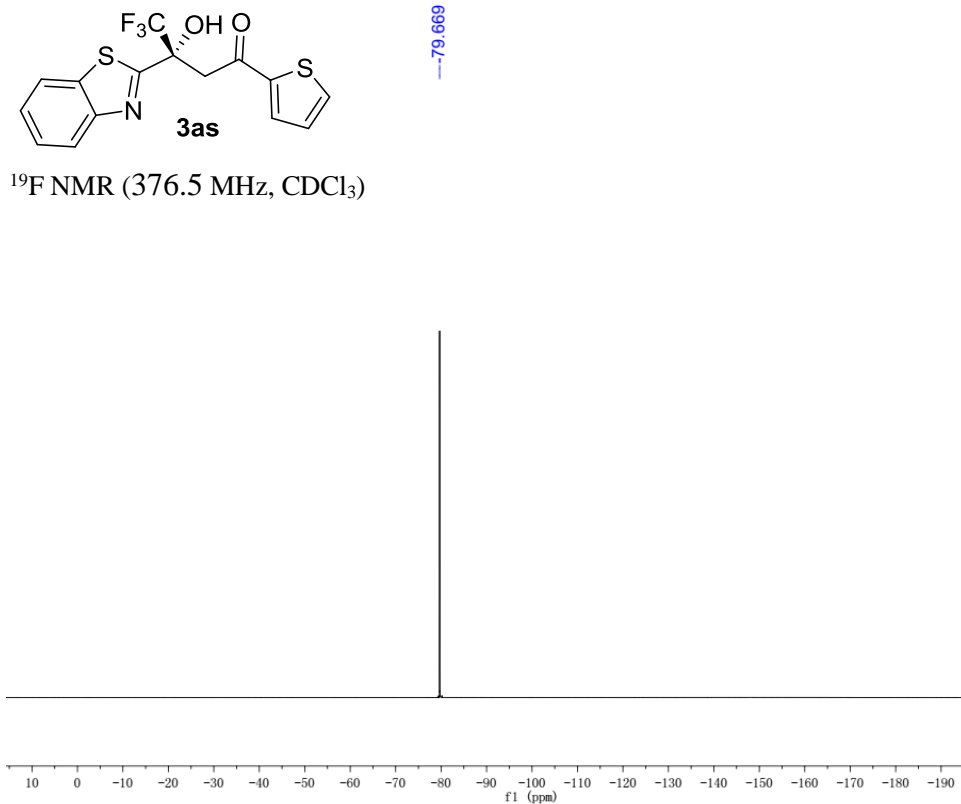

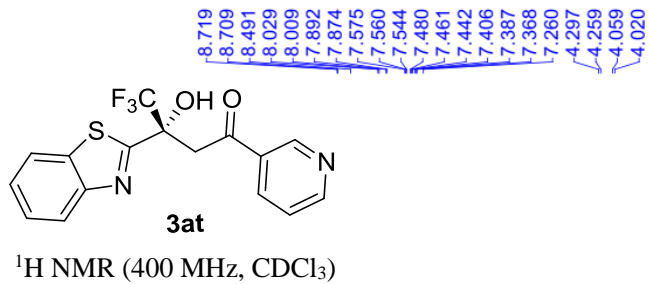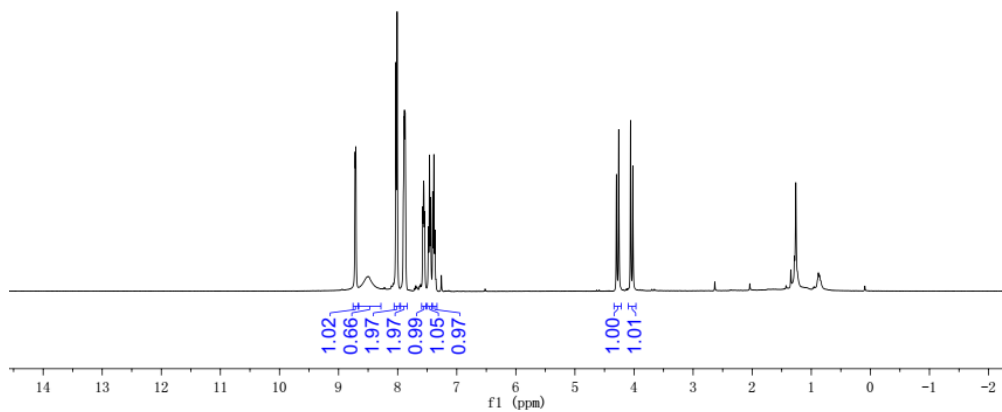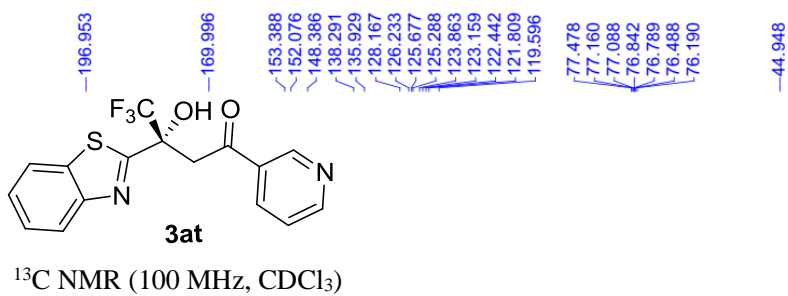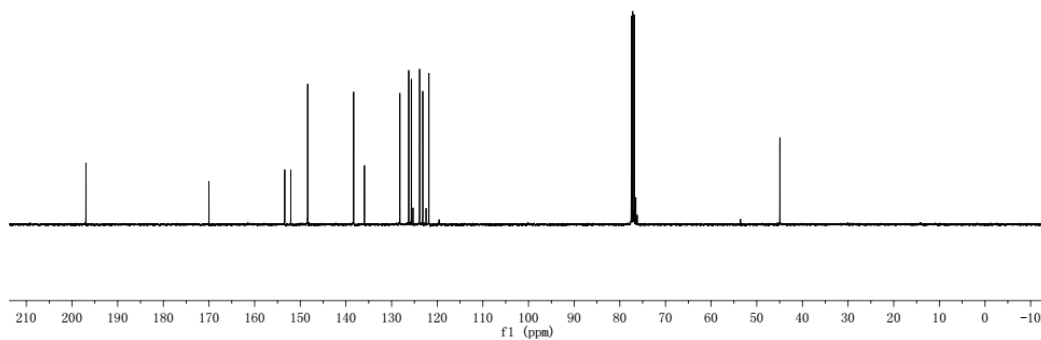

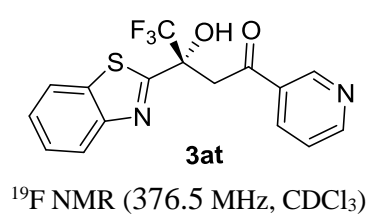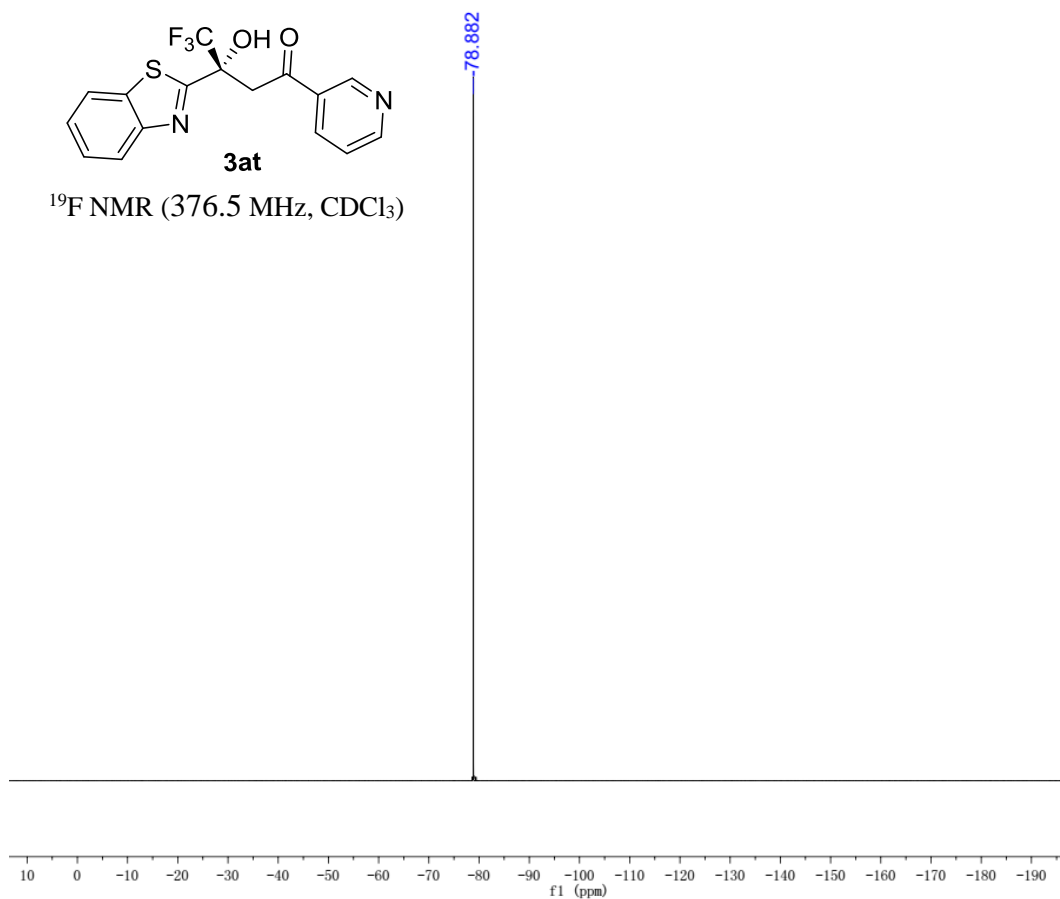

8.015  
 7.995  
 7.918  
 7.898  
 7.502  
 7.484  
 7.464  
 7.433  
 7.415  
 7.396  
 7.260  
 -5.616  
 -4.521  
 -4.129  
 -4.084  
 -3.405  
 -3.392  
 -3.367

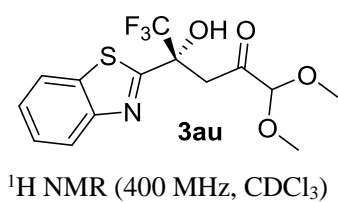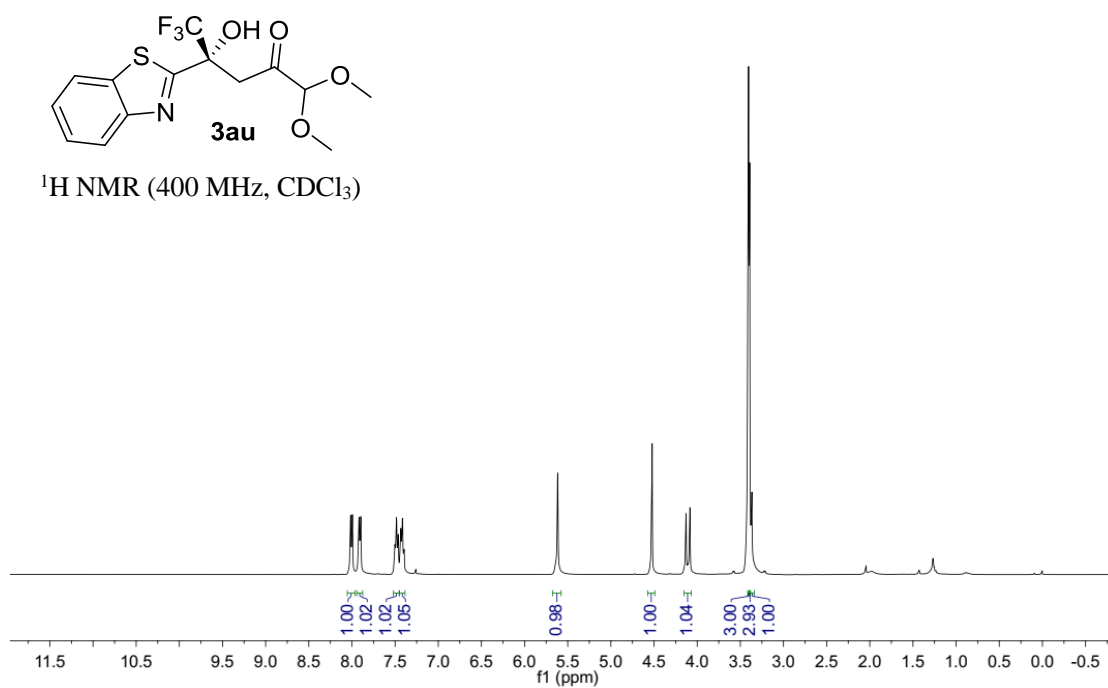

1.00  
 1.02  
 1.05  
 0.98  
 1.00  
 1.04  
 3.00  
 2.93  
 1.00



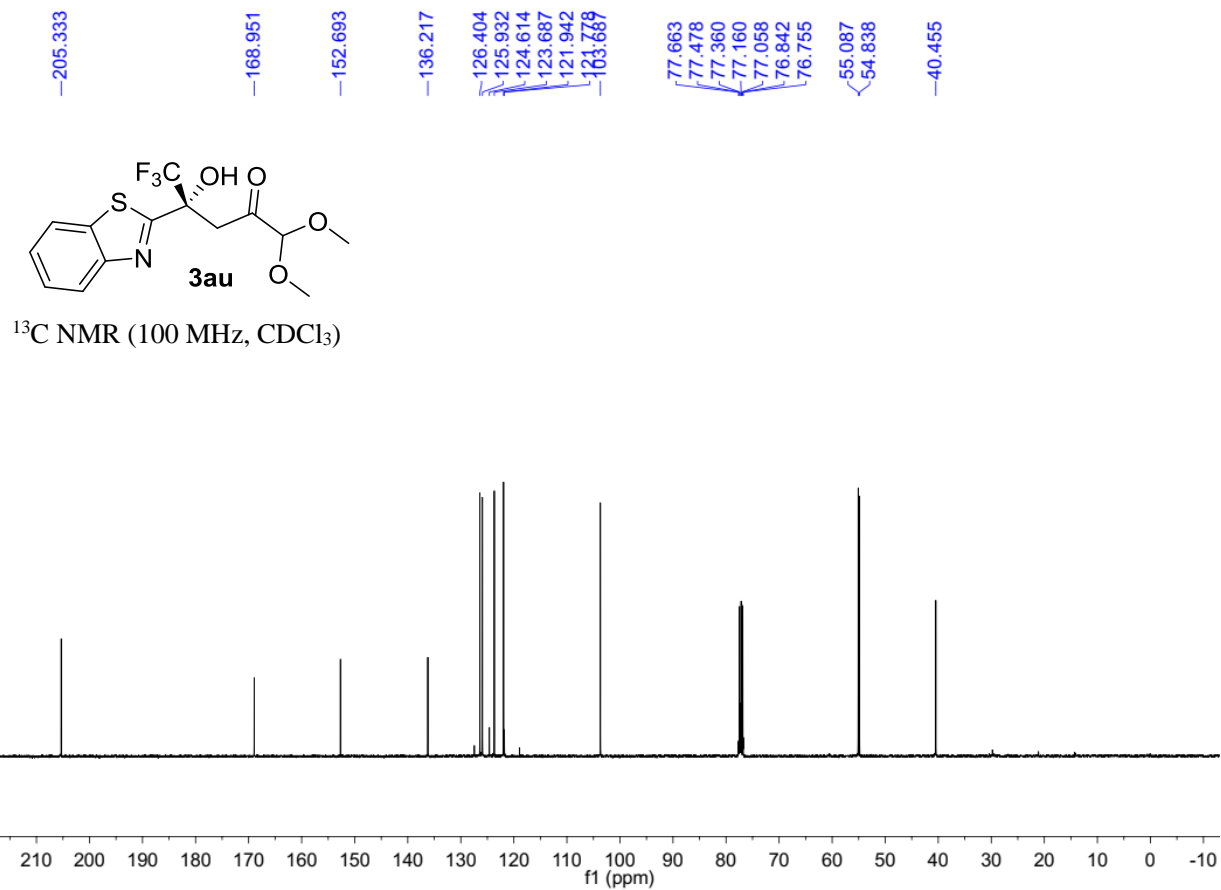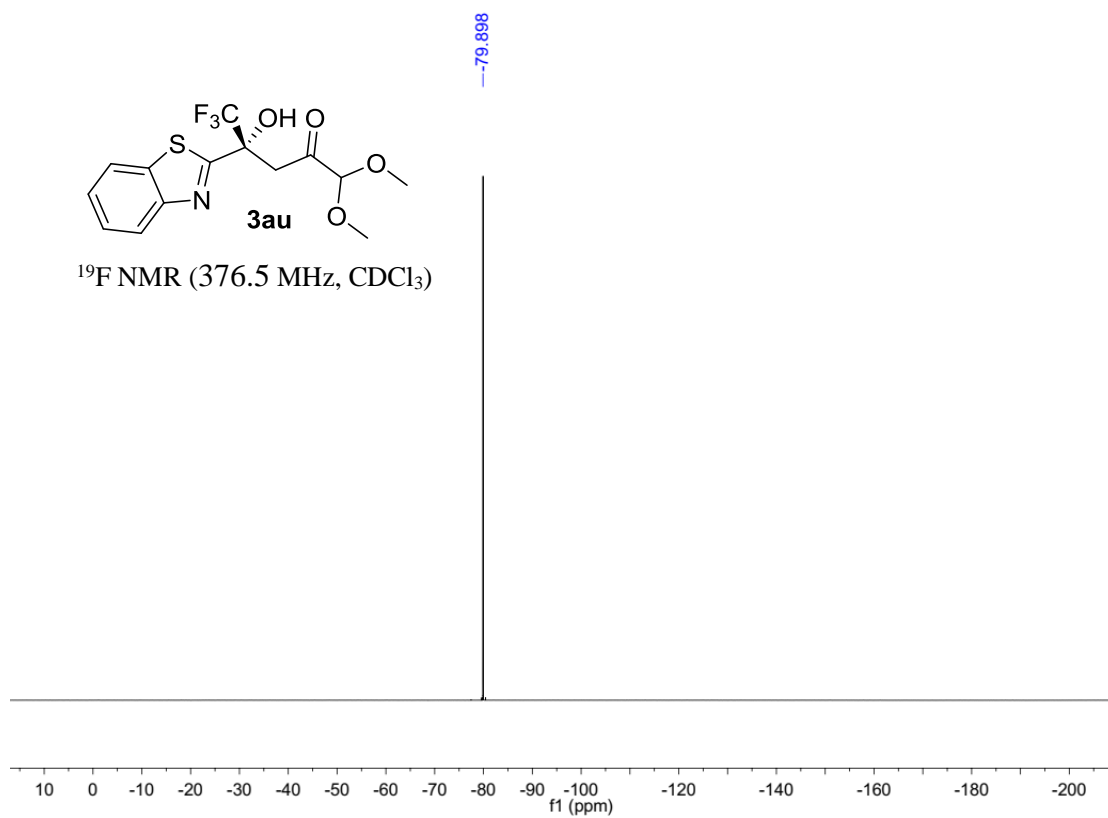

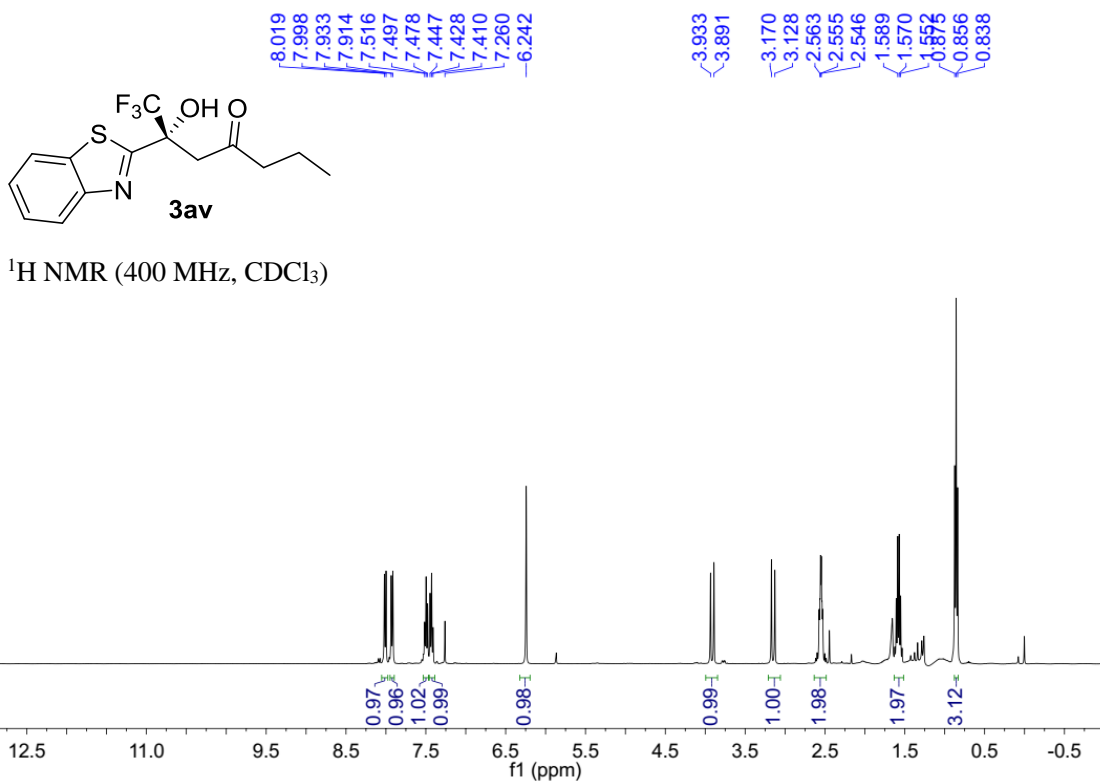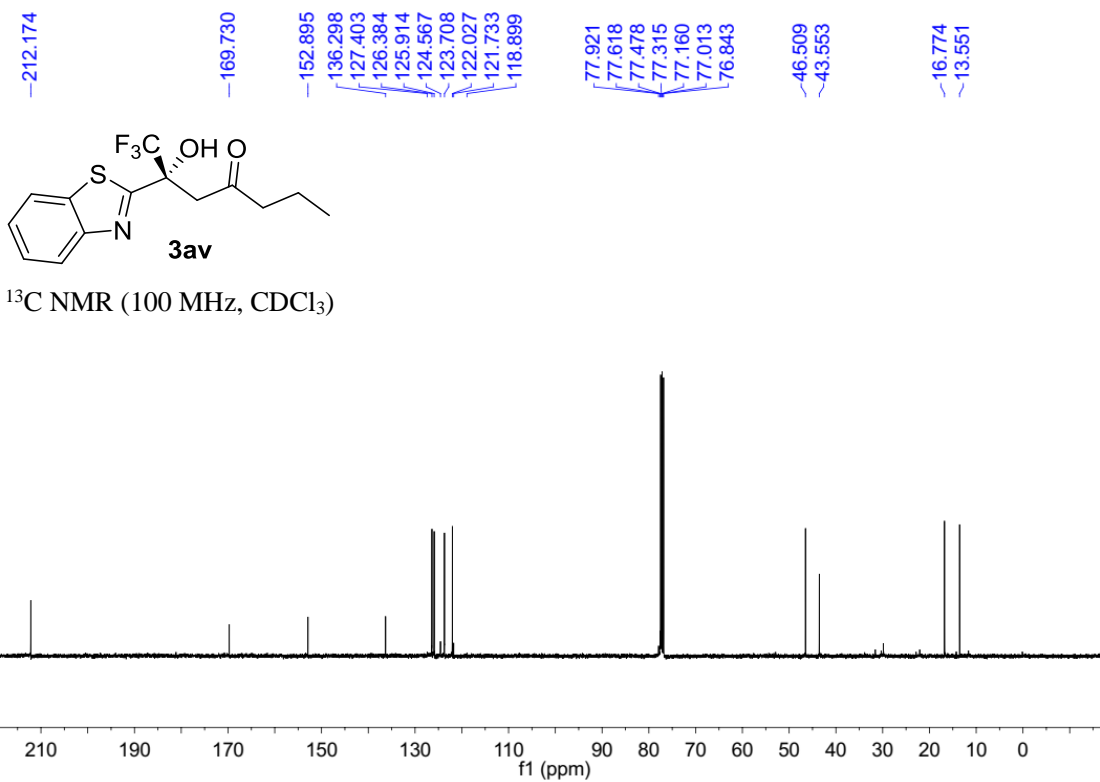

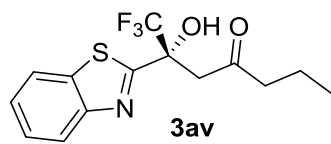

$^{19}\text{F}$  NMR (376.5 MHz,  $\text{CDCl}_3$ )

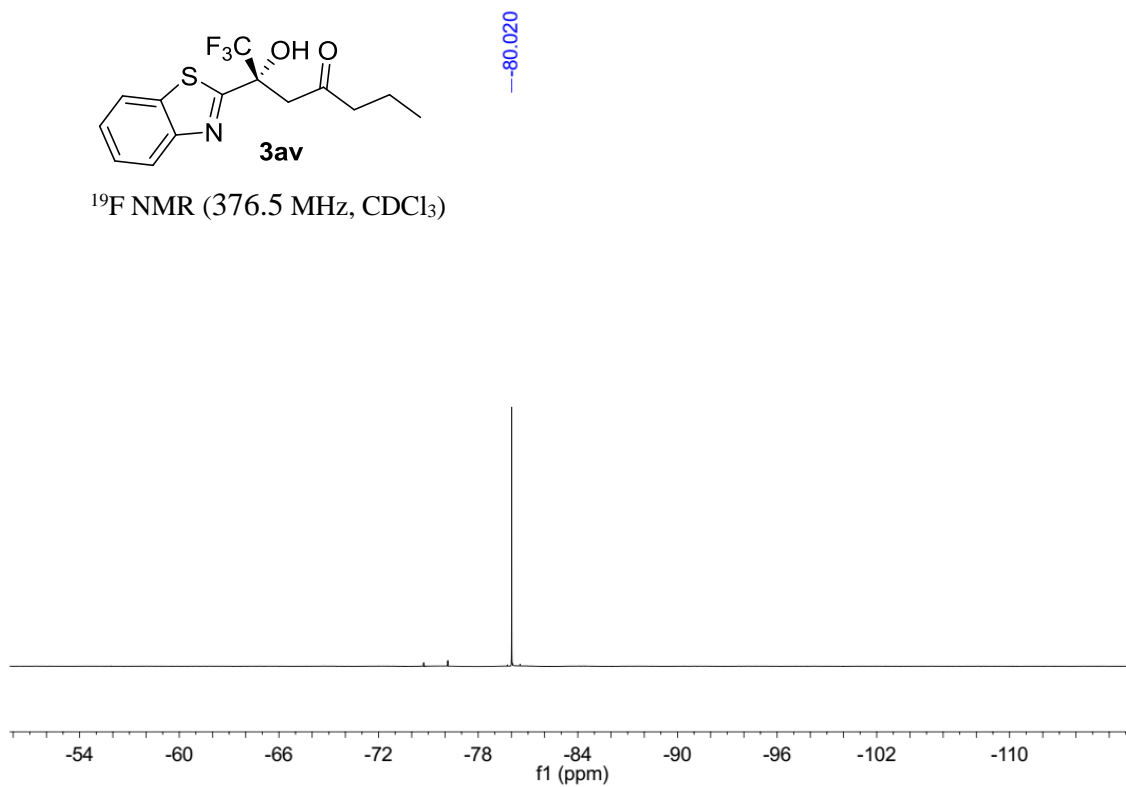

8.054  
8.033  
7.919  
7.899  
7.512  
7.491  
7.471  
7.432  
7.412  
7.391  
7.260  
6.416

4.045  
4.002  
3.362  
3.319

2.056  
2.049  
2.037  
2.025  
2.018  
1.180  
1.173  
1.169  
1.162  
1.148  
1.140  
1.136  
1.128  
1.019  
1.008  
0.999  
0.996  
0.987  
0.977  
0.967  
0.955

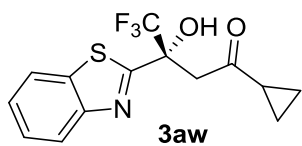

$^1\text{H}$  NMR (400 MHz,  $\text{CDCl}_3$ )

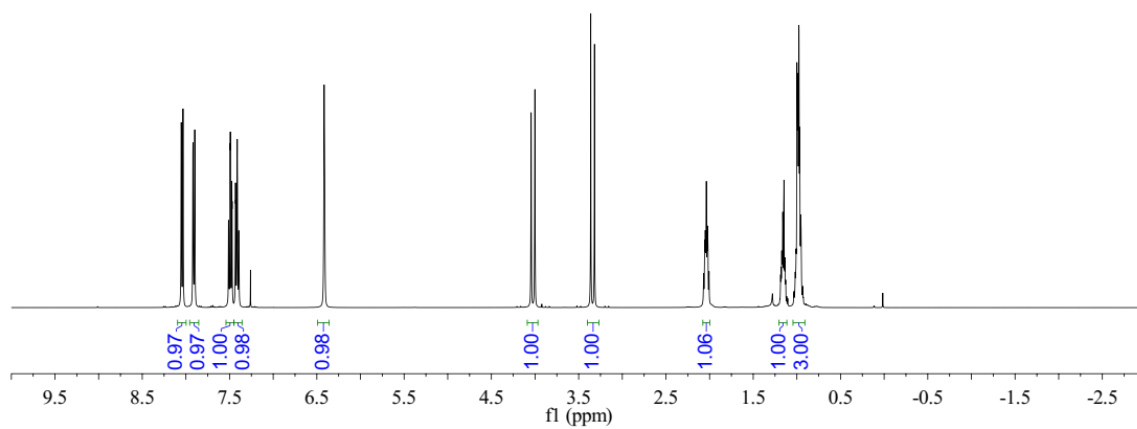

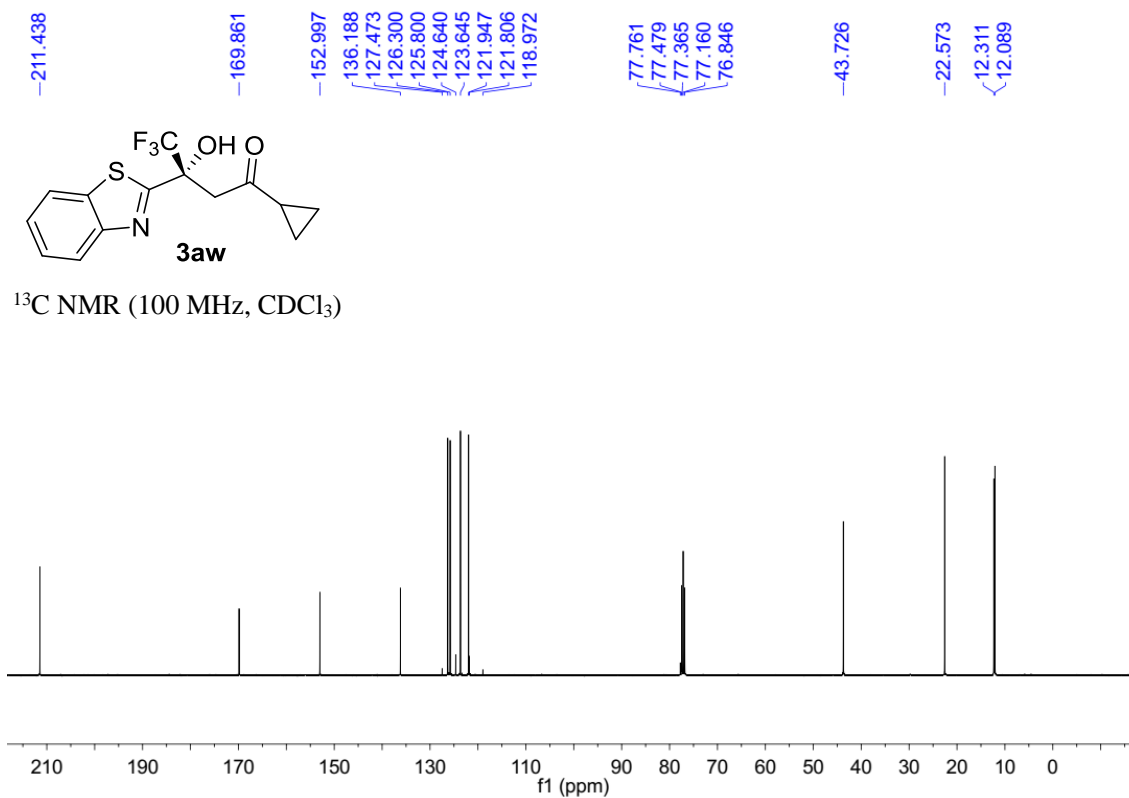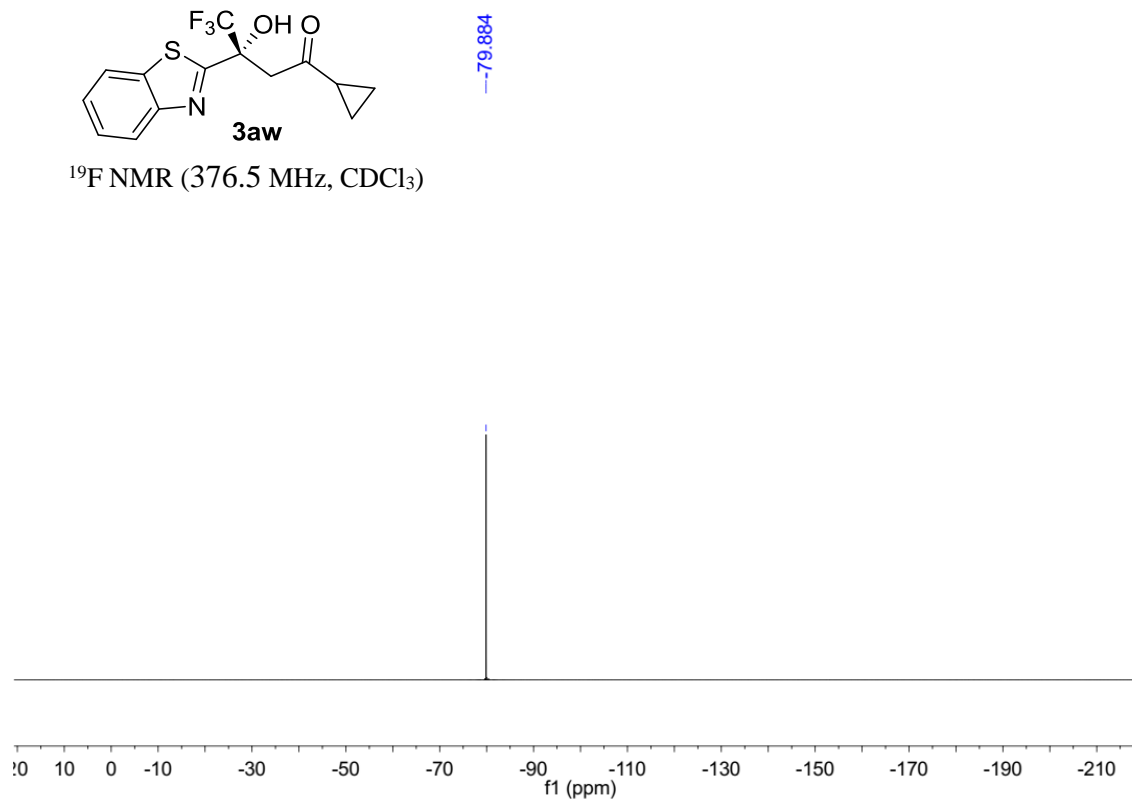

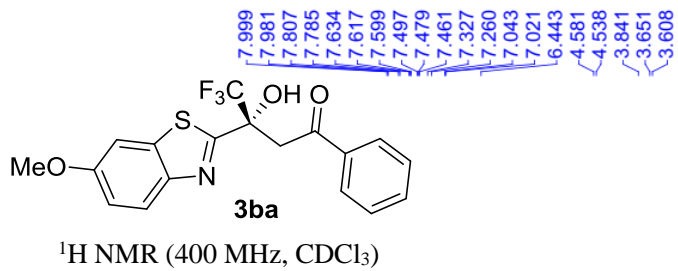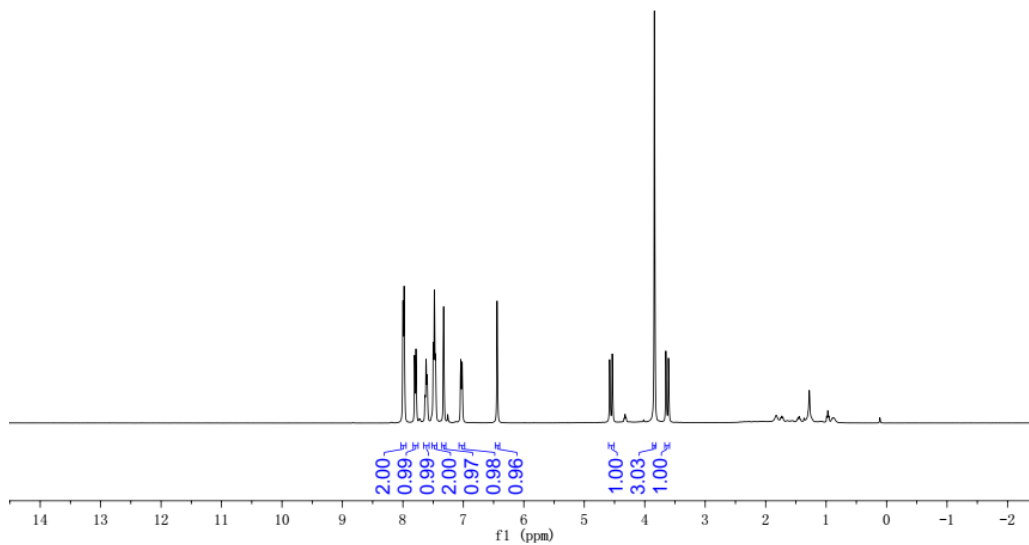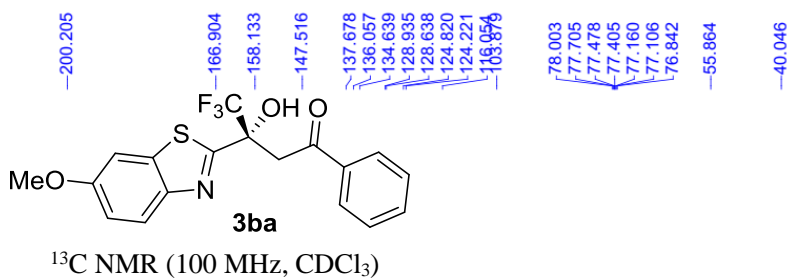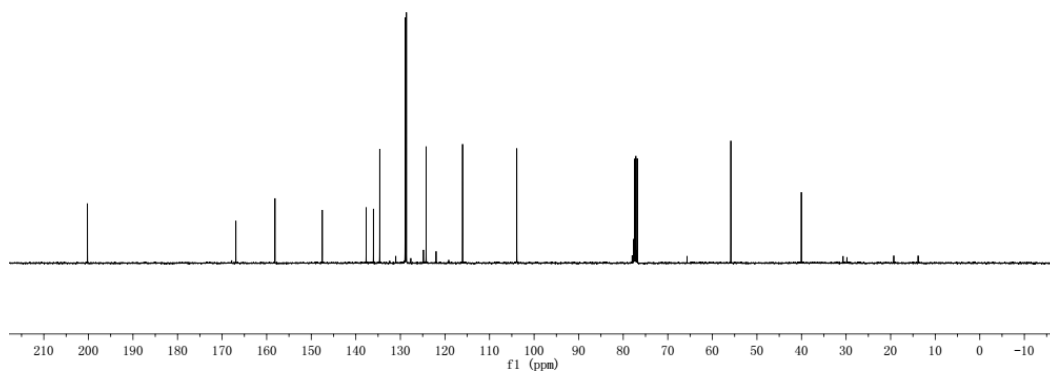

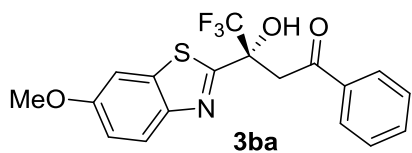

$^{19}\text{F}$  NMR (376.5 MHz,  $\text{CDCl}_3$ )

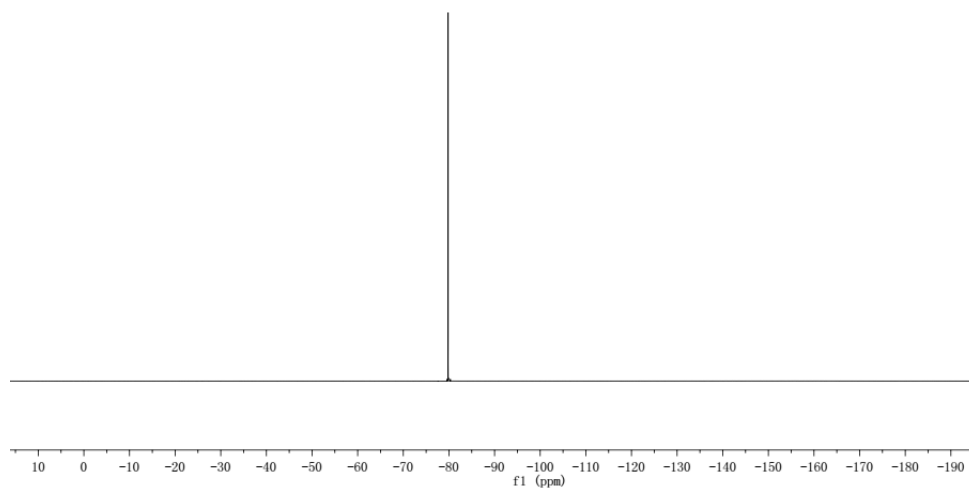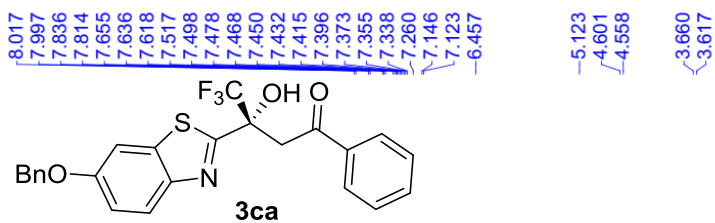

$^1\text{H}$  NMR (400 MHz,  $\text{CDCl}_3$ )

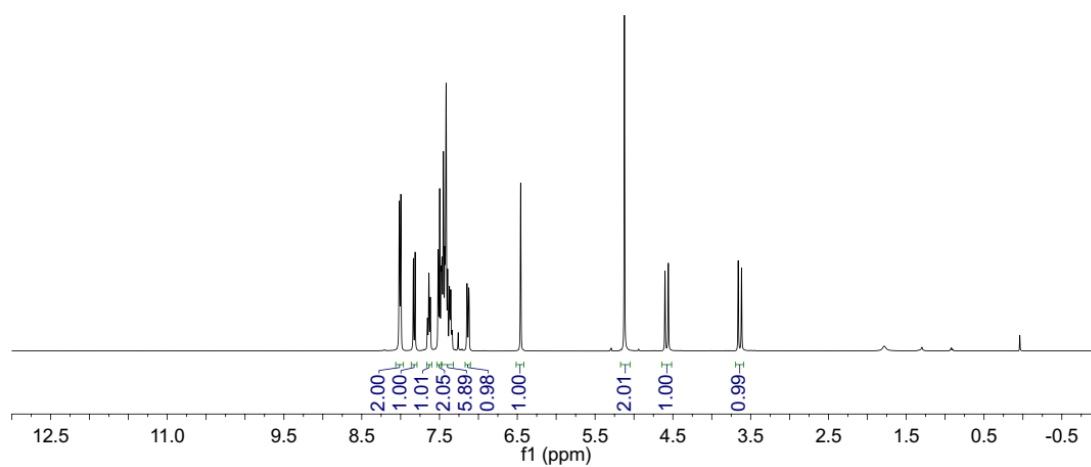

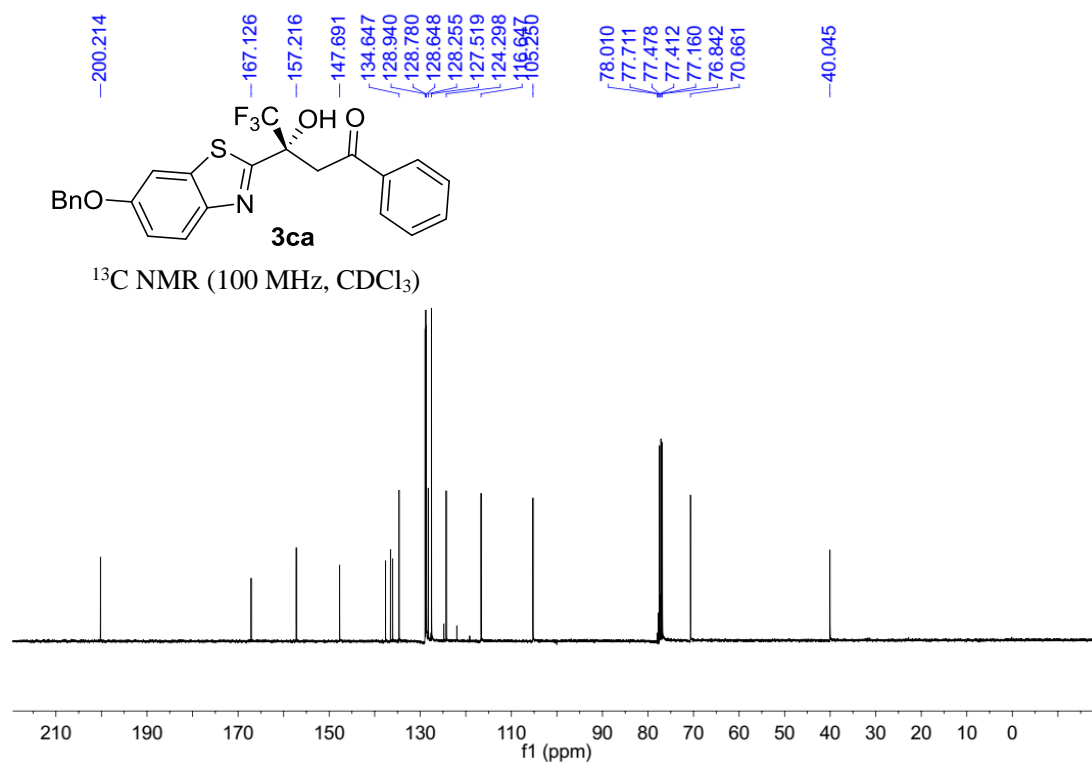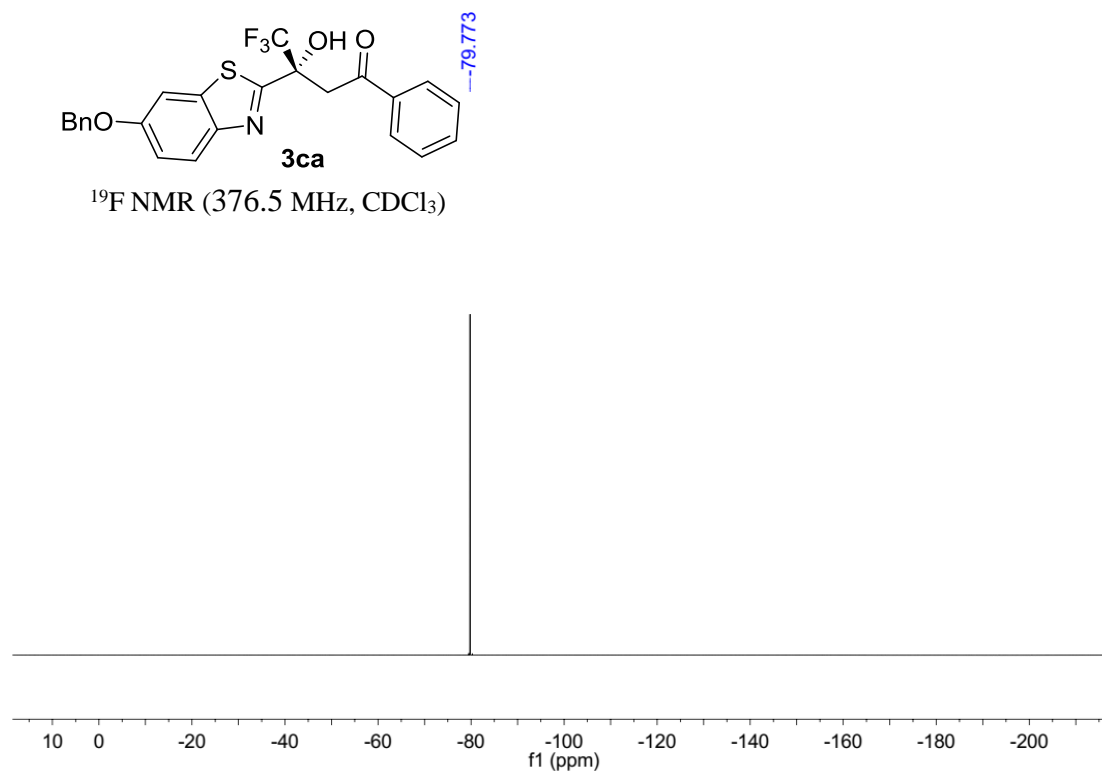

8.004  
7.985  
7.811  
7.789  
7.639  
7.621  
7.604  
7.502  
7.484  
7.467  
7.347  
7.260  
7.079  
7.056  
6.440  
6.094  
6.081  
6.067  
6.054  
6.051  
6.045  
6.038  
6.031  
6.025  
5.454  
5.411  
5.326  
5.300  
4.584  
4.540  
3.650  
3.607

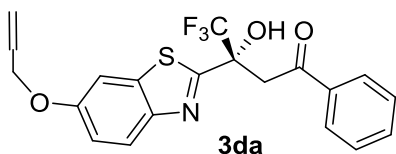

$^1\text{H NMR}$  (400 MHz,  $\text{CDCl}_3$ )

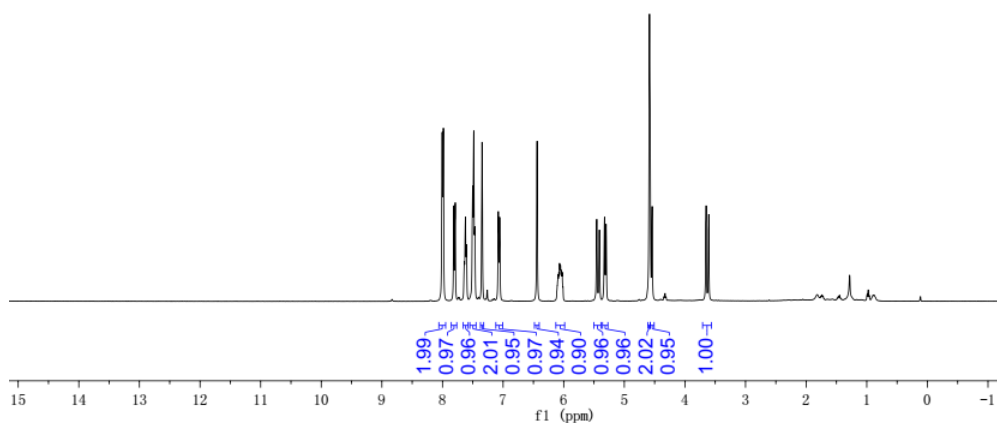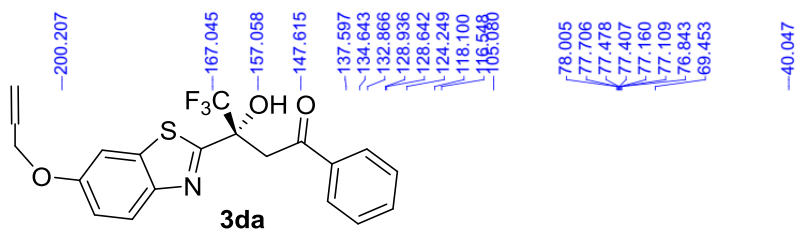

$^{13}\text{C NMR}$  (100 MHz,  $\text{CDCl}_3$ )

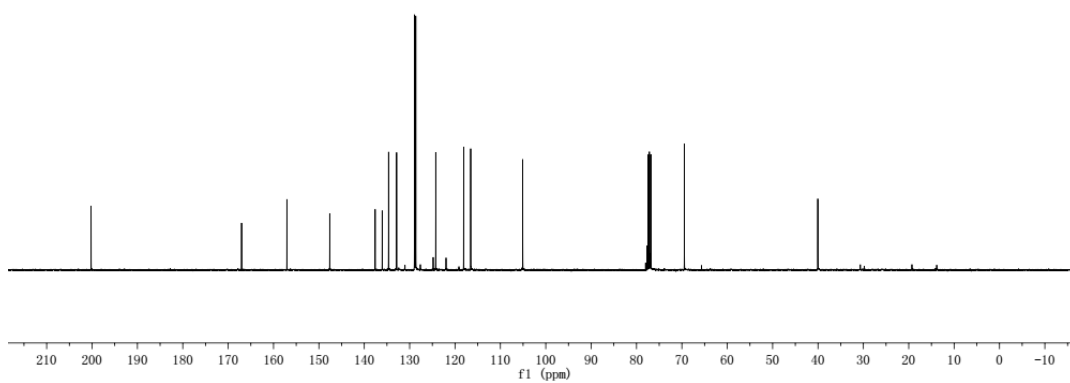



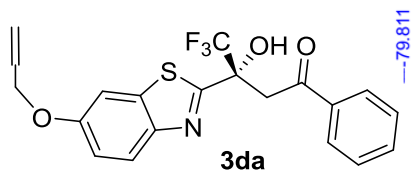

$^{19}\text{F}$  NMR (376.5 MHz,  $\text{CDCl}_3$ )

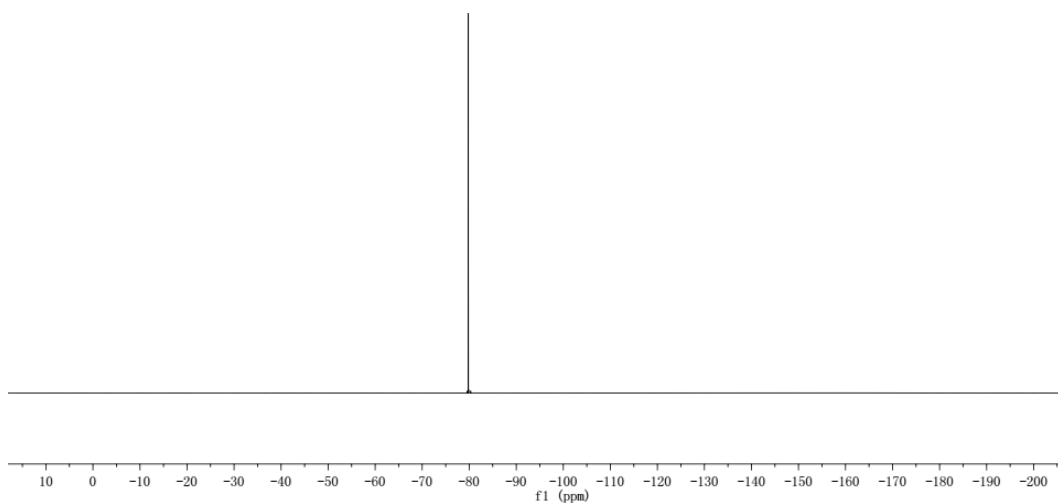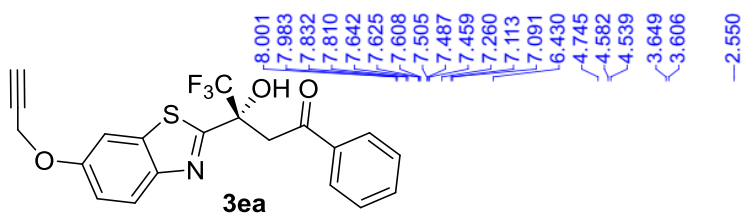

$^1\text{H}$  NMR (400 MHz,  $\text{CDCl}_3$ )

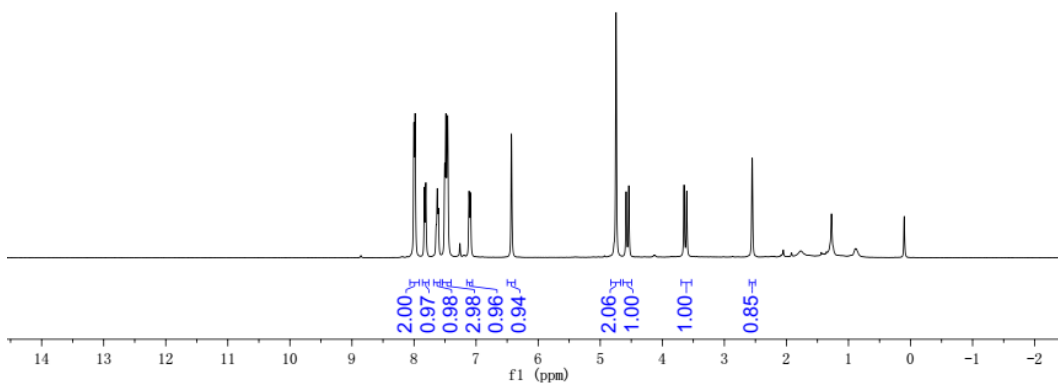

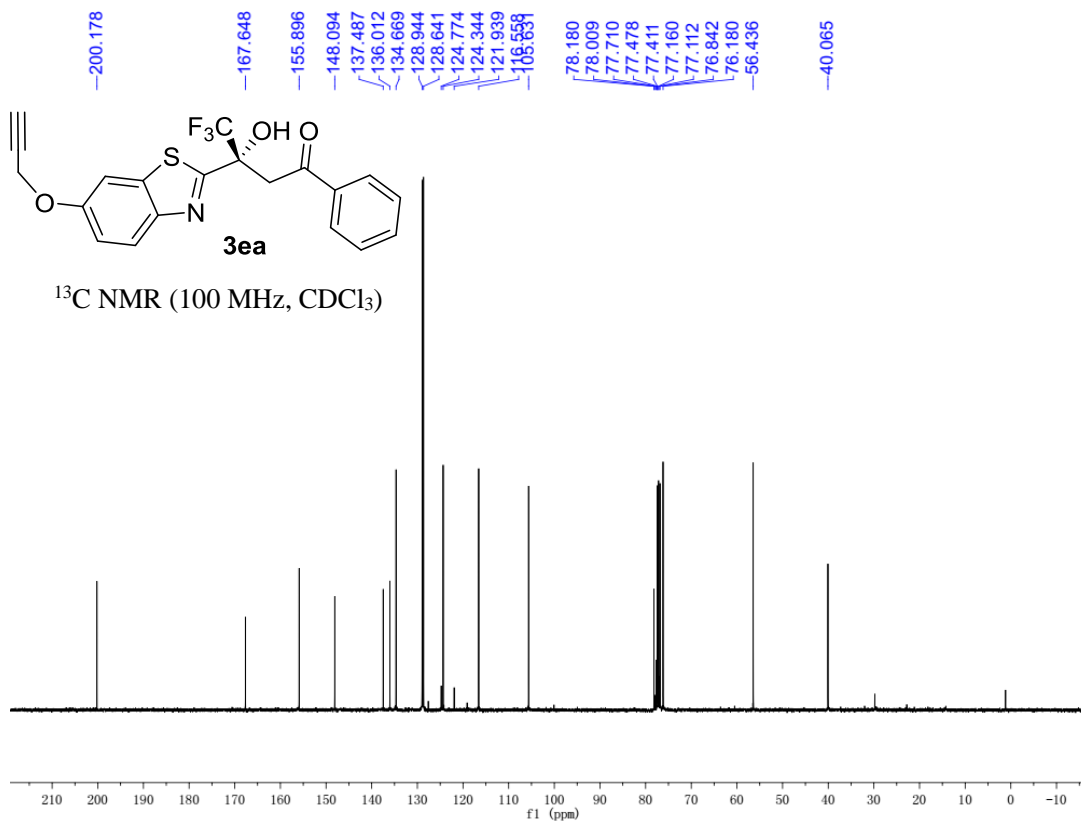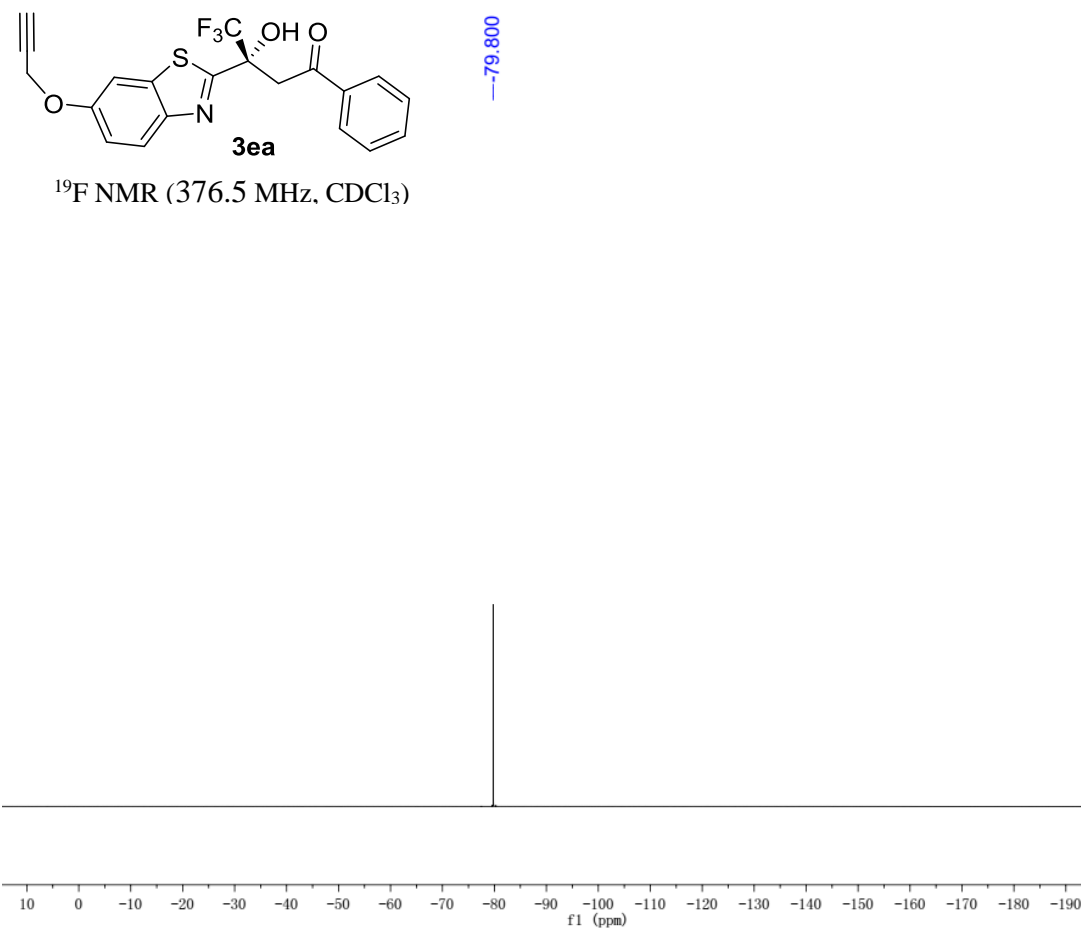

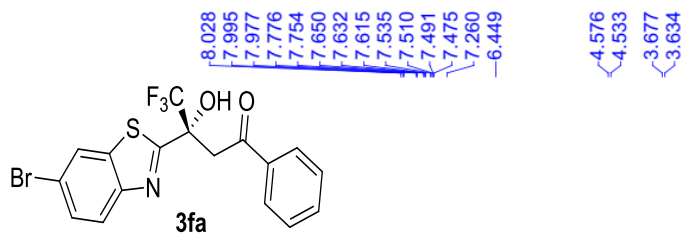

$^1\text{H NMR}$  (400 MHz,  $\text{CDCl}_3$ )

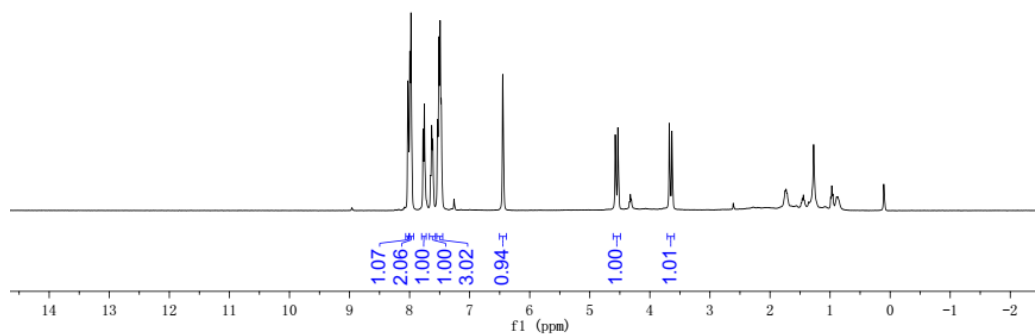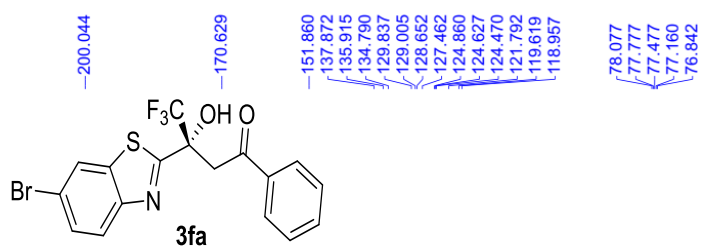

$^{13}\text{C NMR}$  (100 MHz,  $\text{CDCl}_3$ )

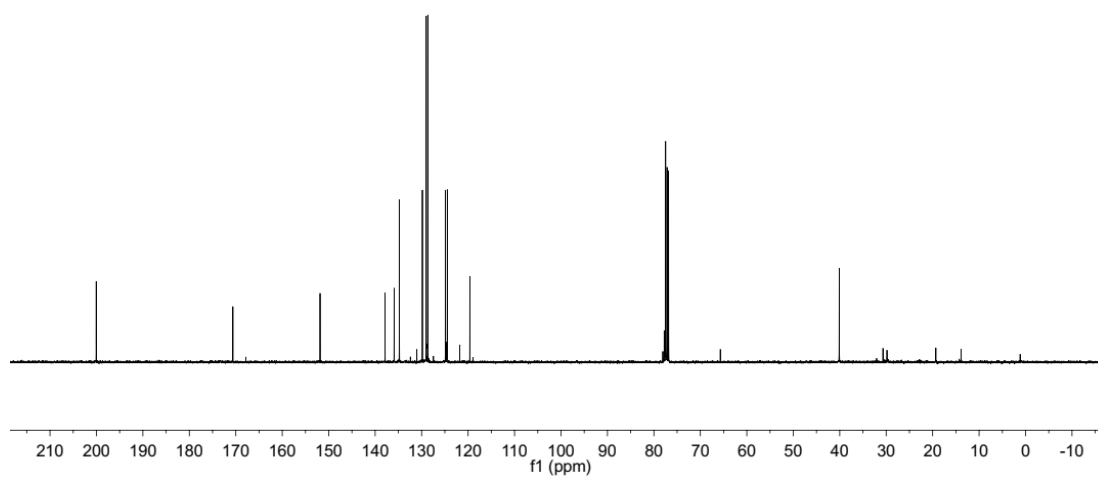

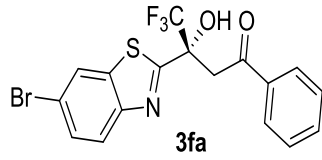

$^{19}\text{F}$  NMR (376.5 MHz,  $\text{CDCl}_3$ )

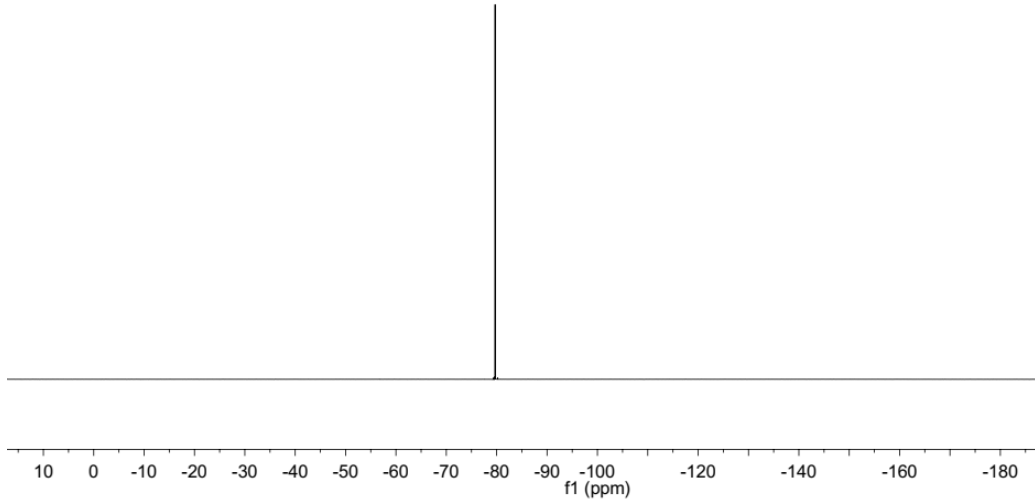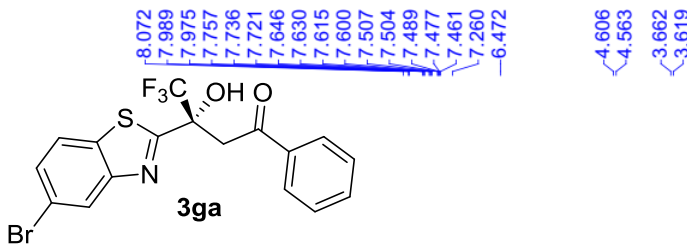

$^1\text{H}$  NMR (400 MHz,  $\text{CDCl}_3$ )

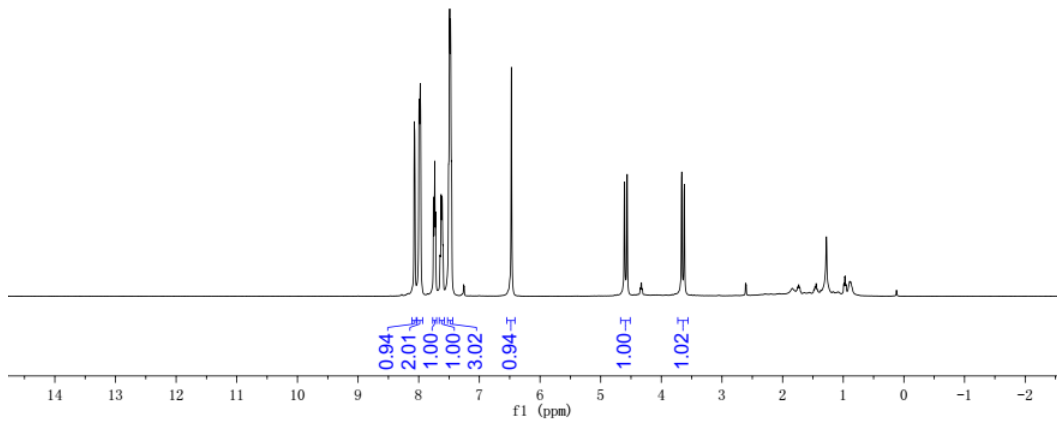

**S99**

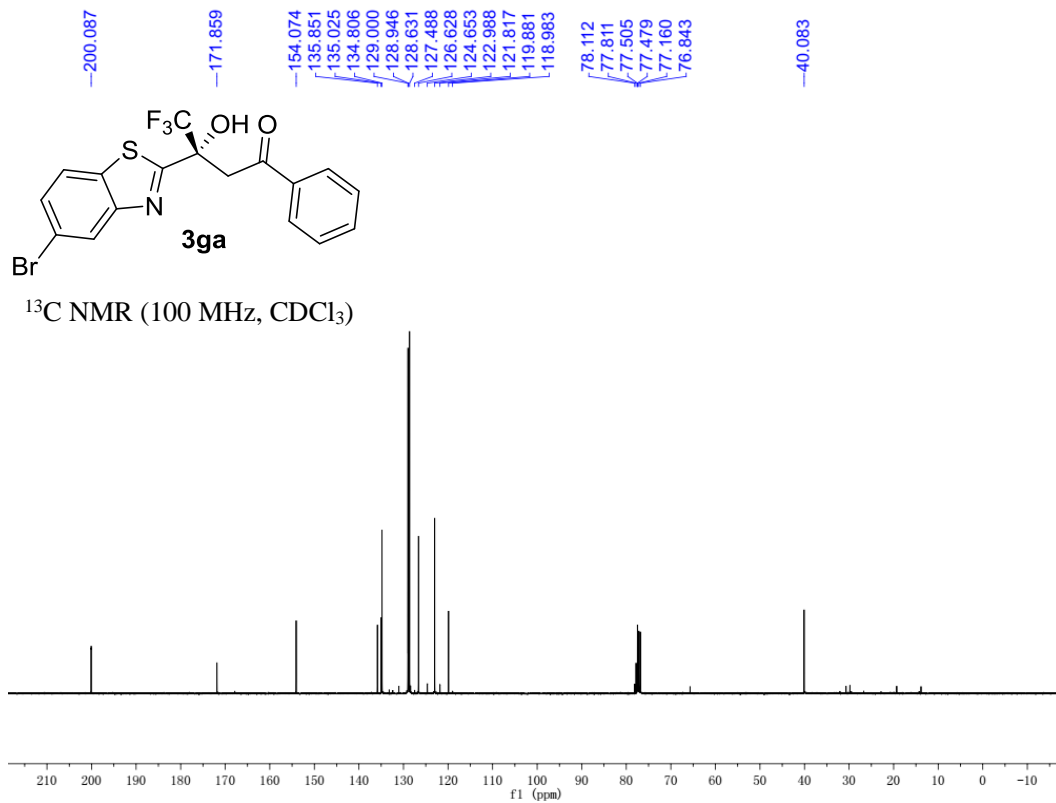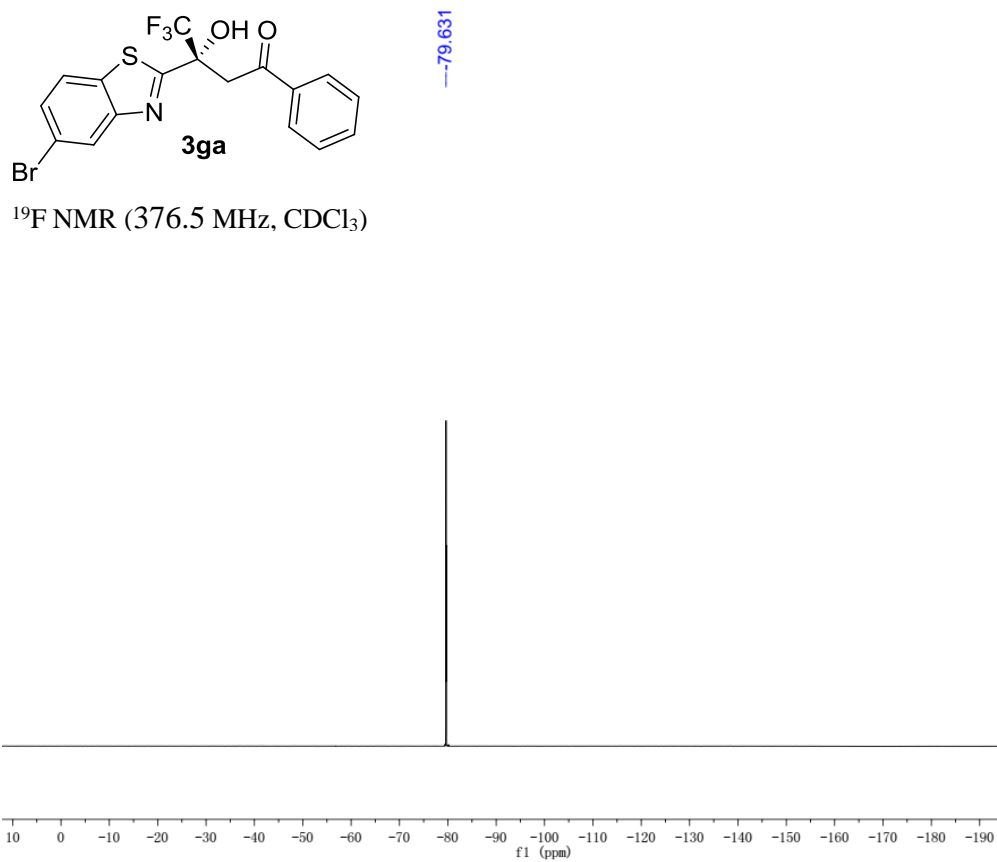

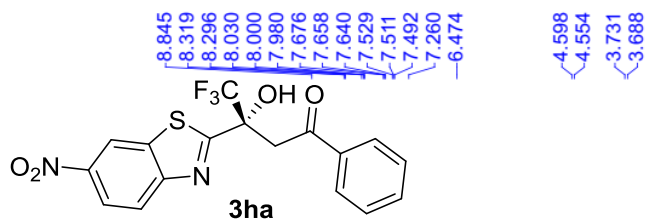

$^1\text{H}$  NMR (400 MHz,  $\text{CDCl}_3$ )

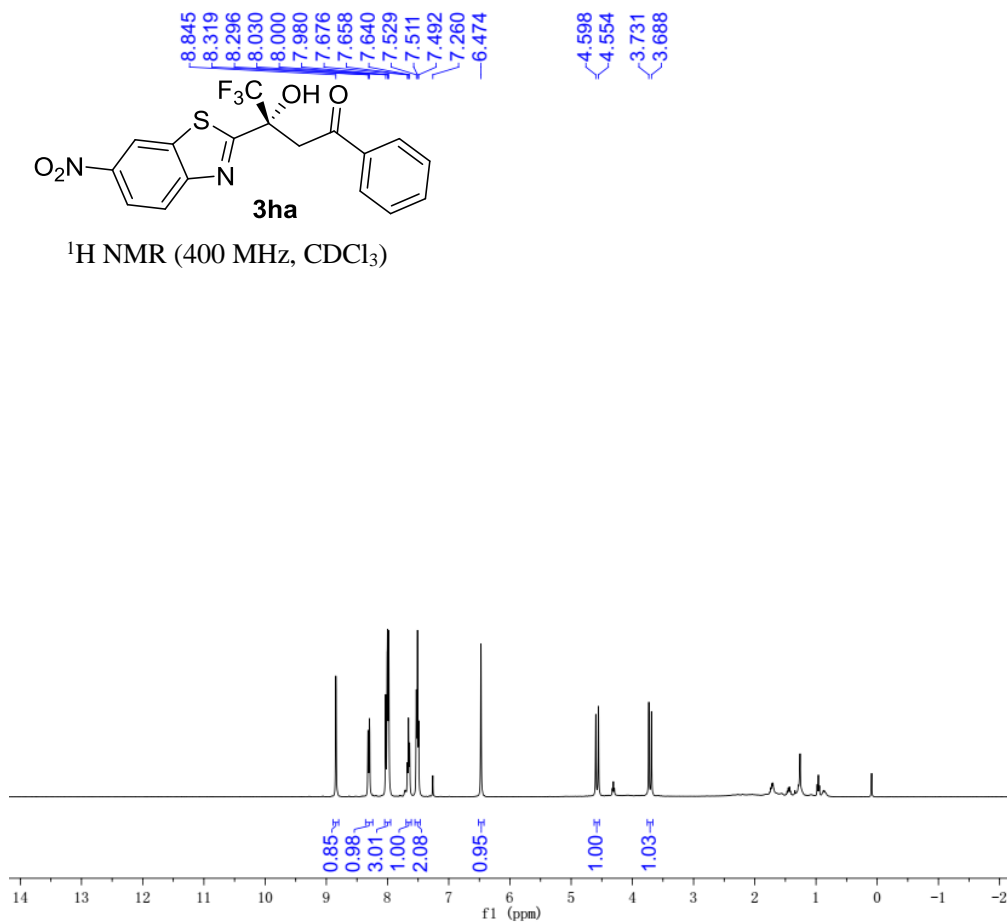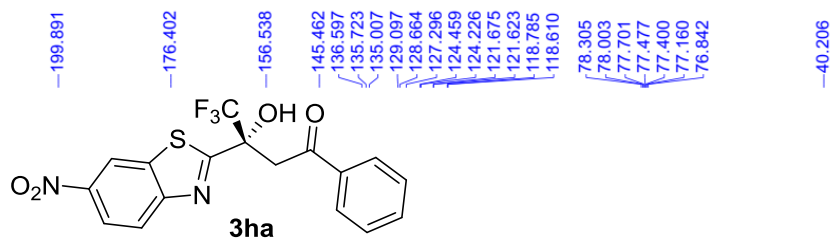

$^{13}\text{C}$  NMR (100 MHz,  $\text{CDCl}_3$ )

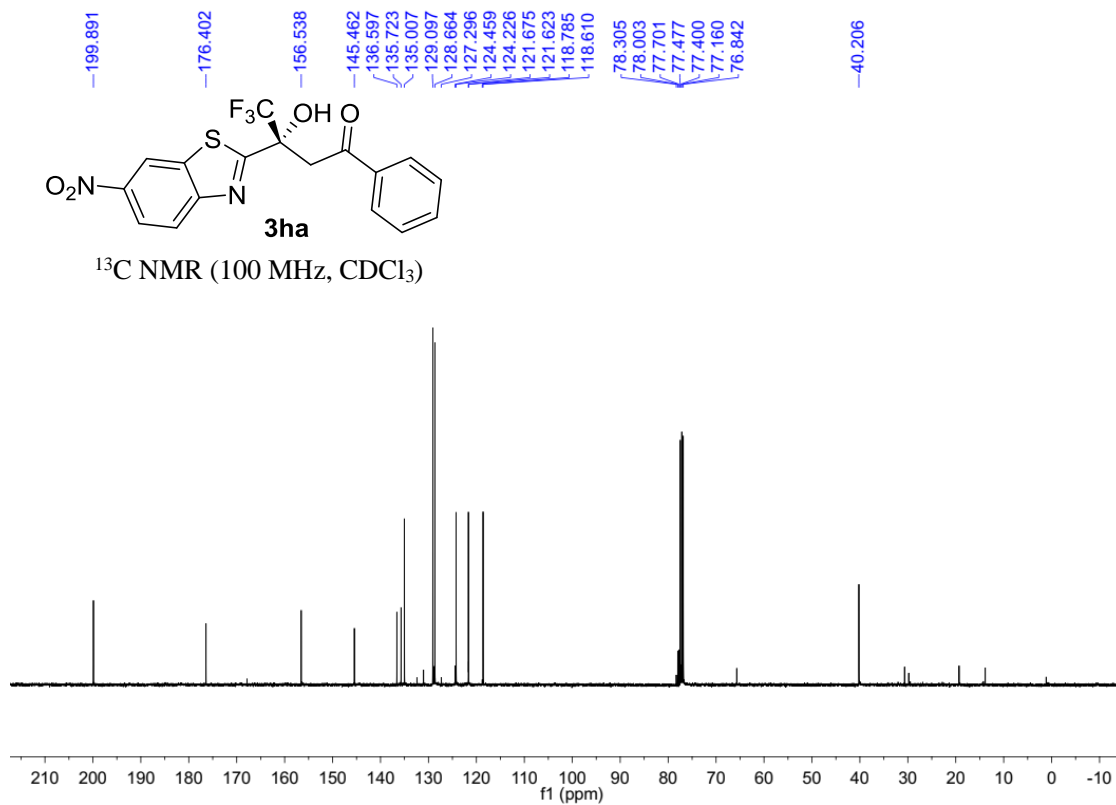

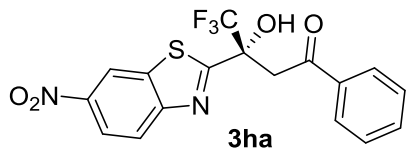

$^{19}\text{F}$  NMR (376.5 MHz,  $\text{CDCl}_3$ )

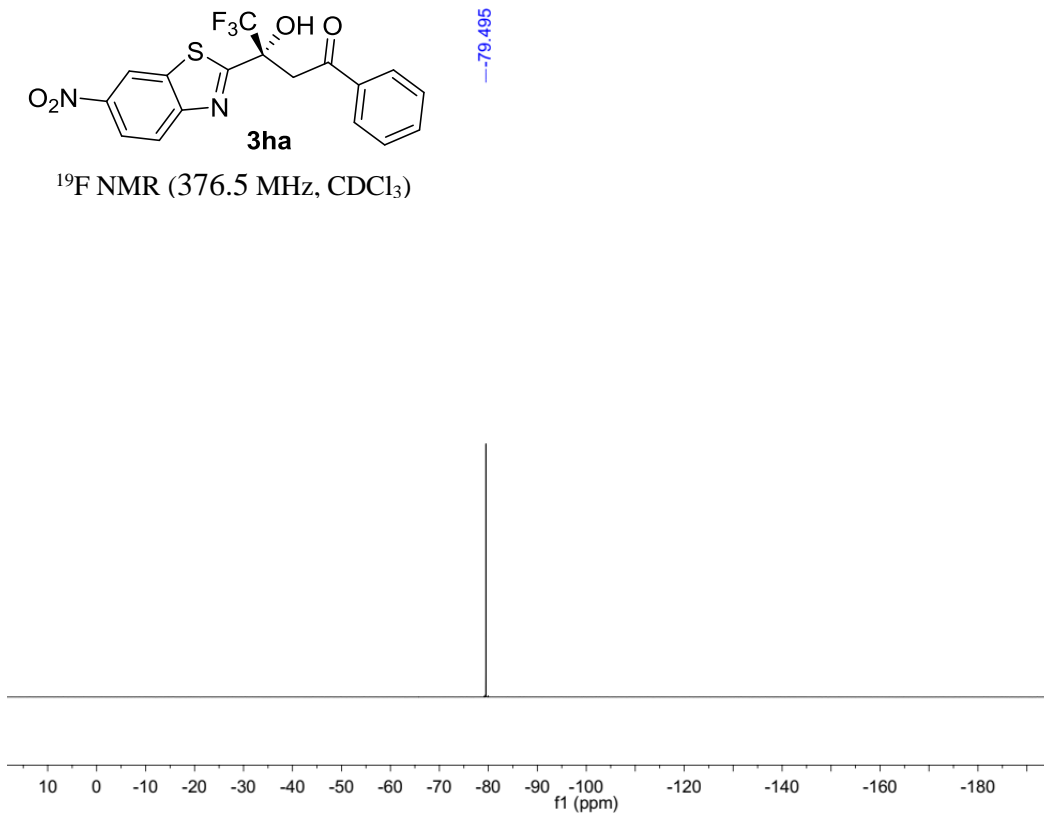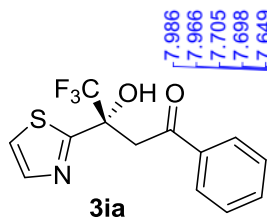

$^1\text{H}$  NMR (400 MHz,  $\text{CDCl}_3$ )

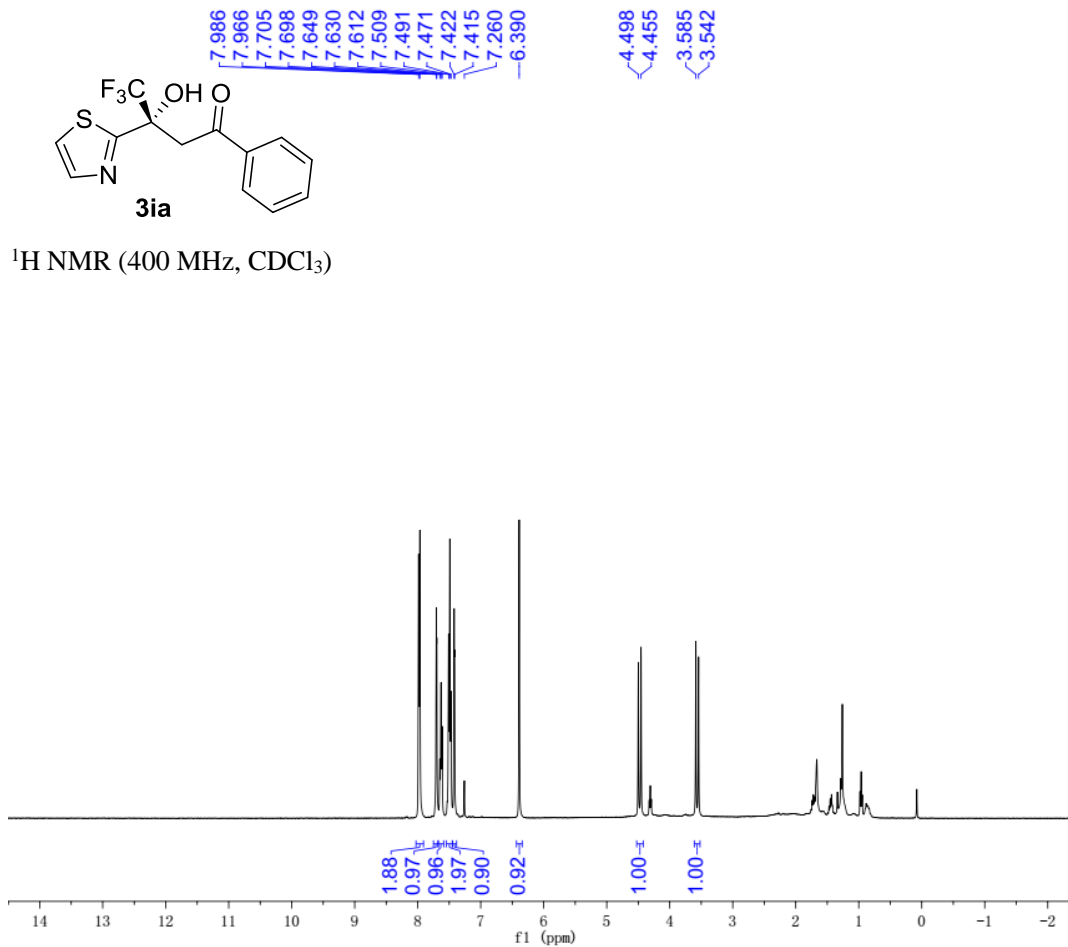

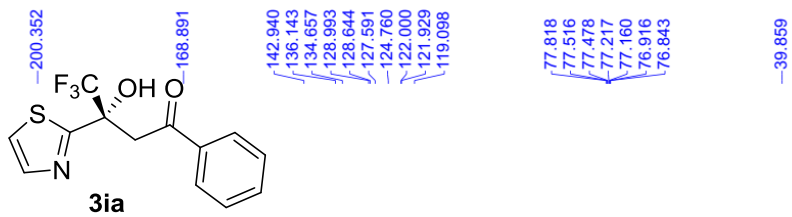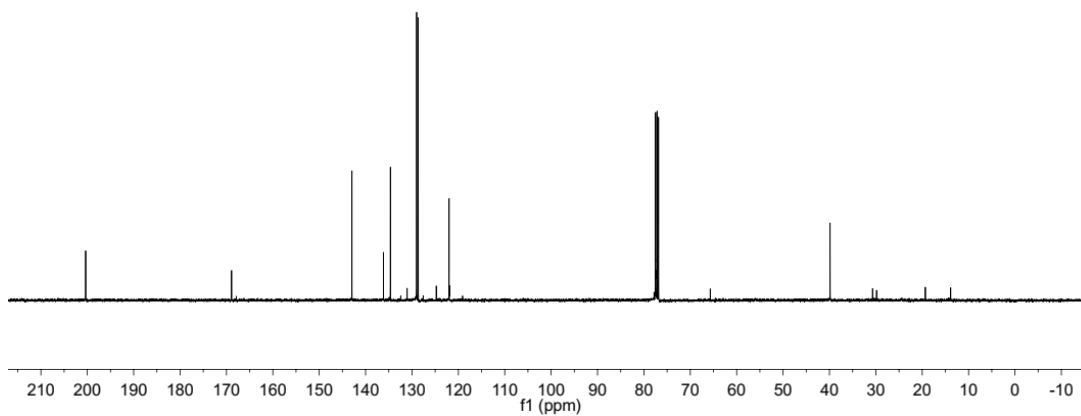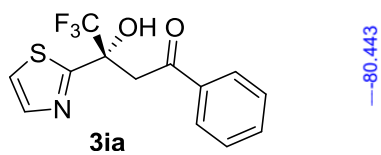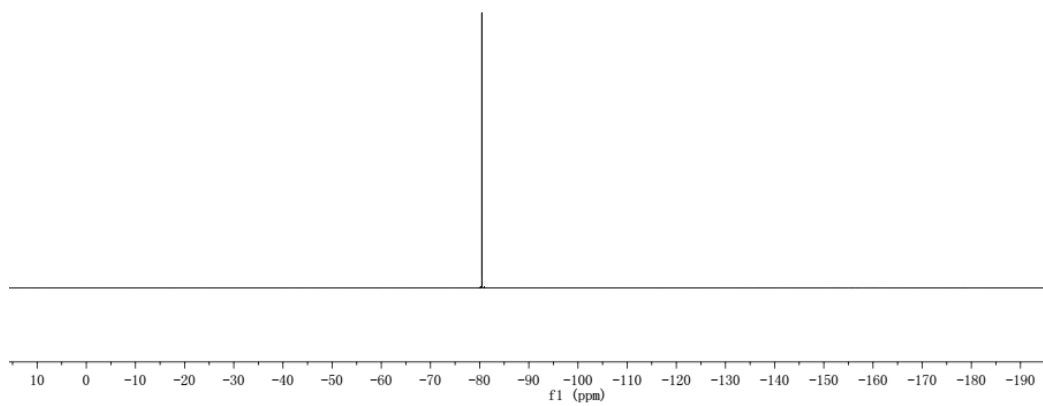



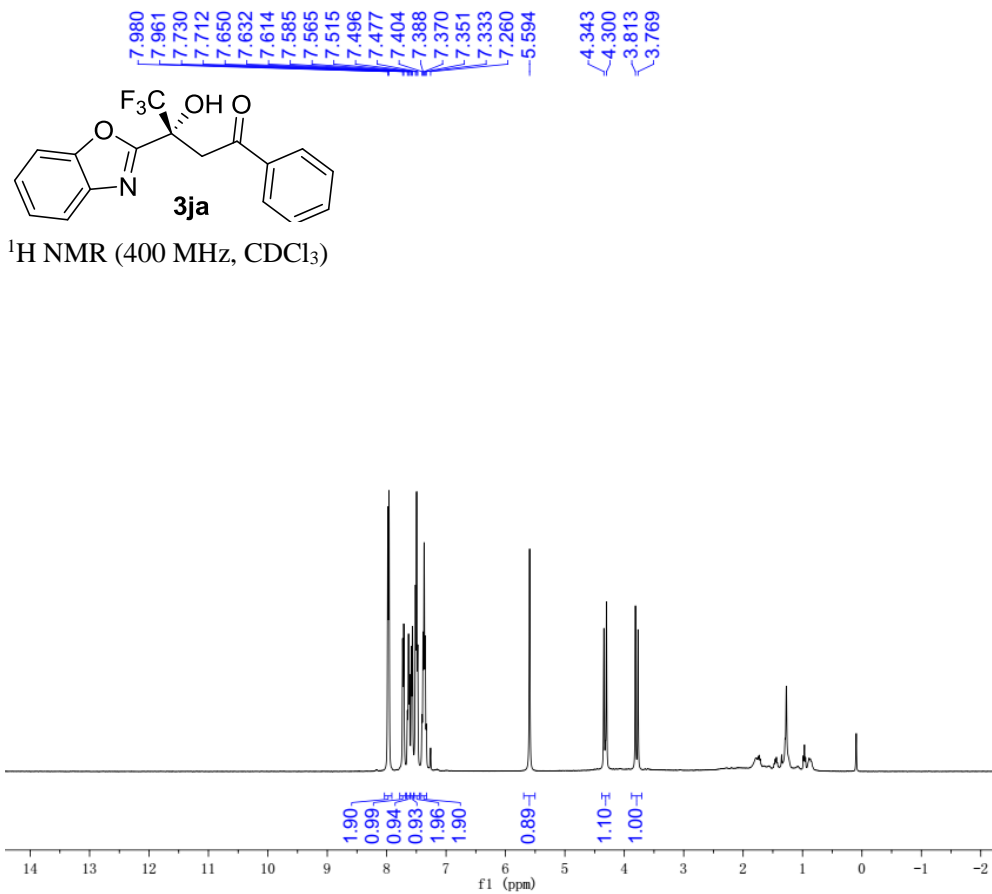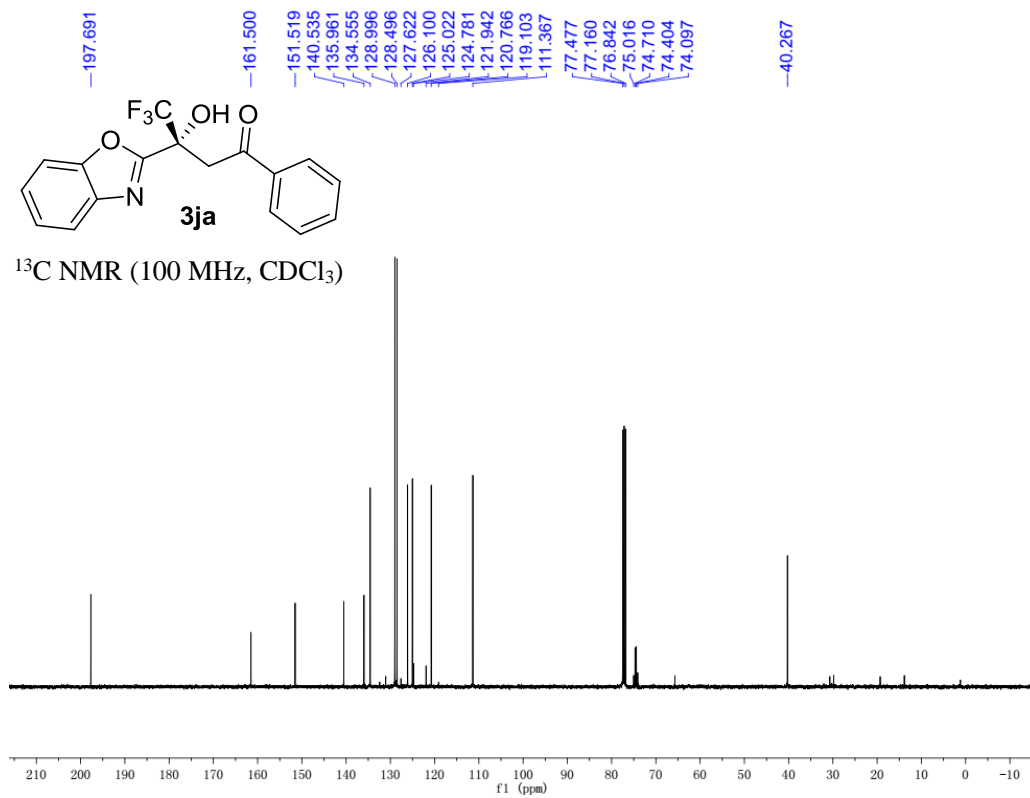

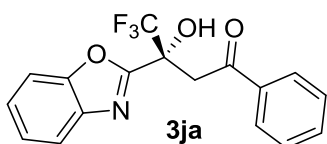

$^{19}\text{F}$  NMR (376.5 MHz,  $\text{CDCl}_3$ )

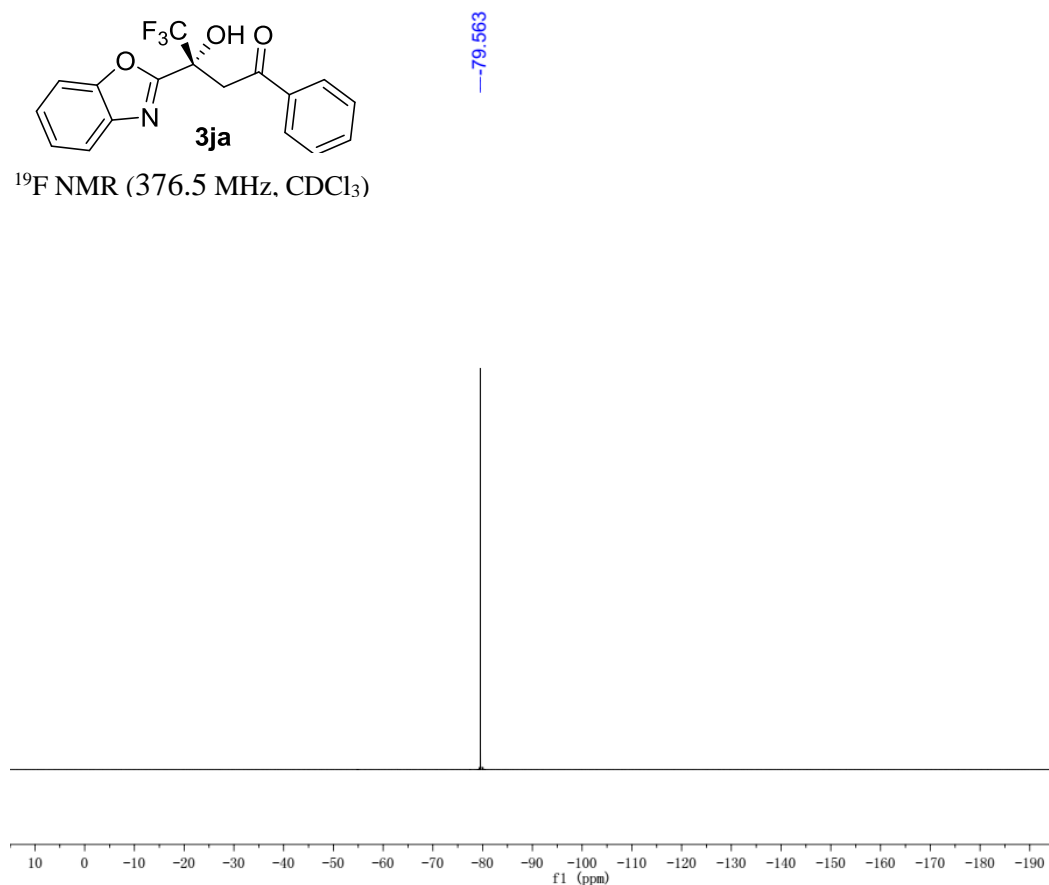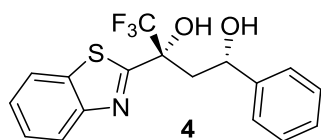

$^1\text{H}$  NMR (400 MHz,  $\text{CD}_3\text{COCD}_3$ )

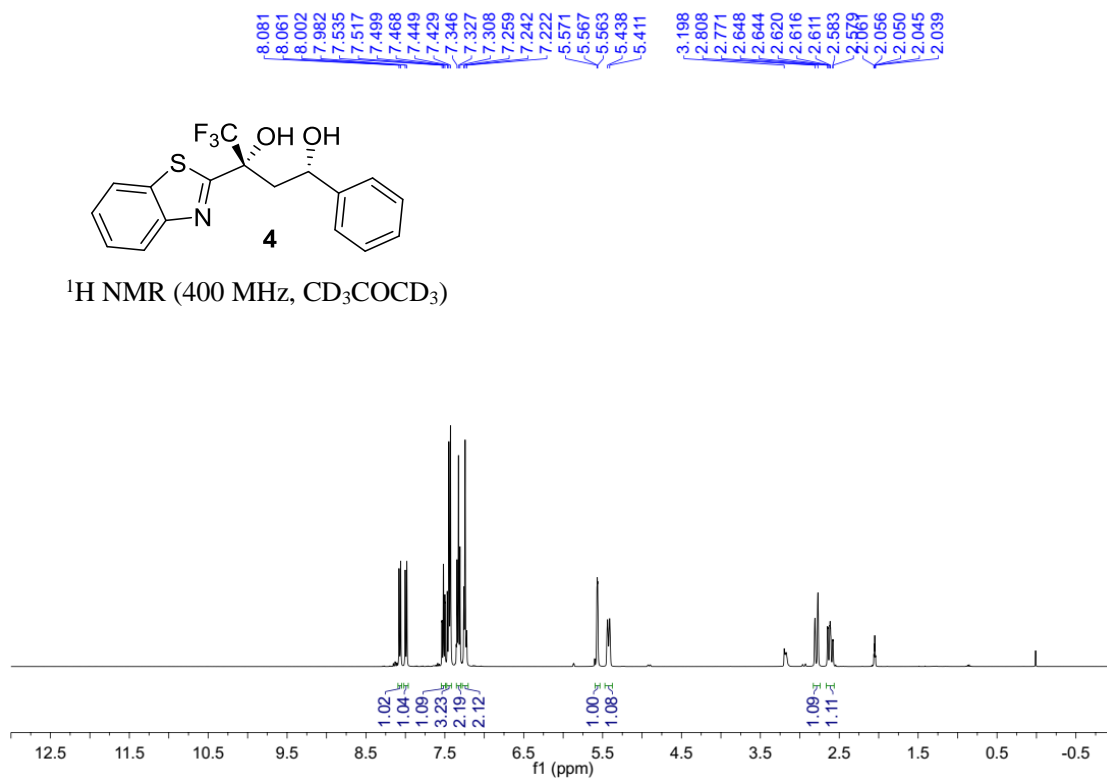

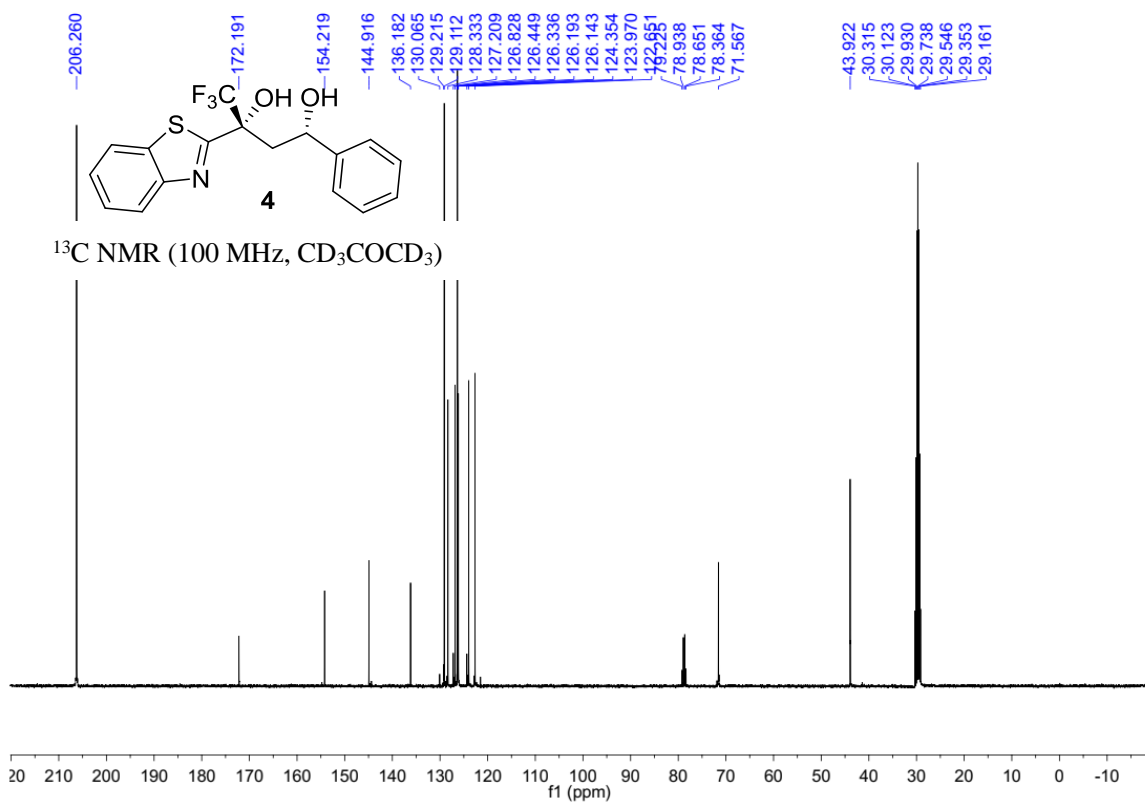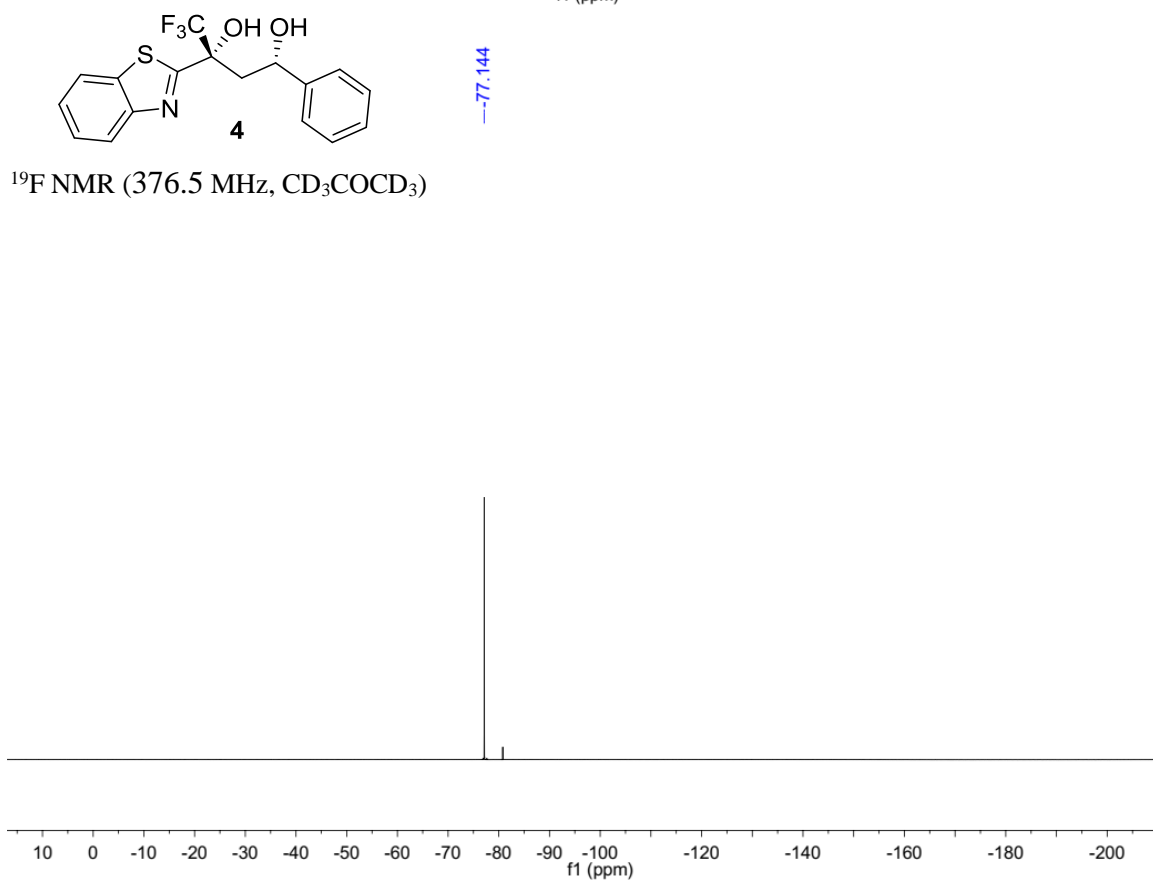

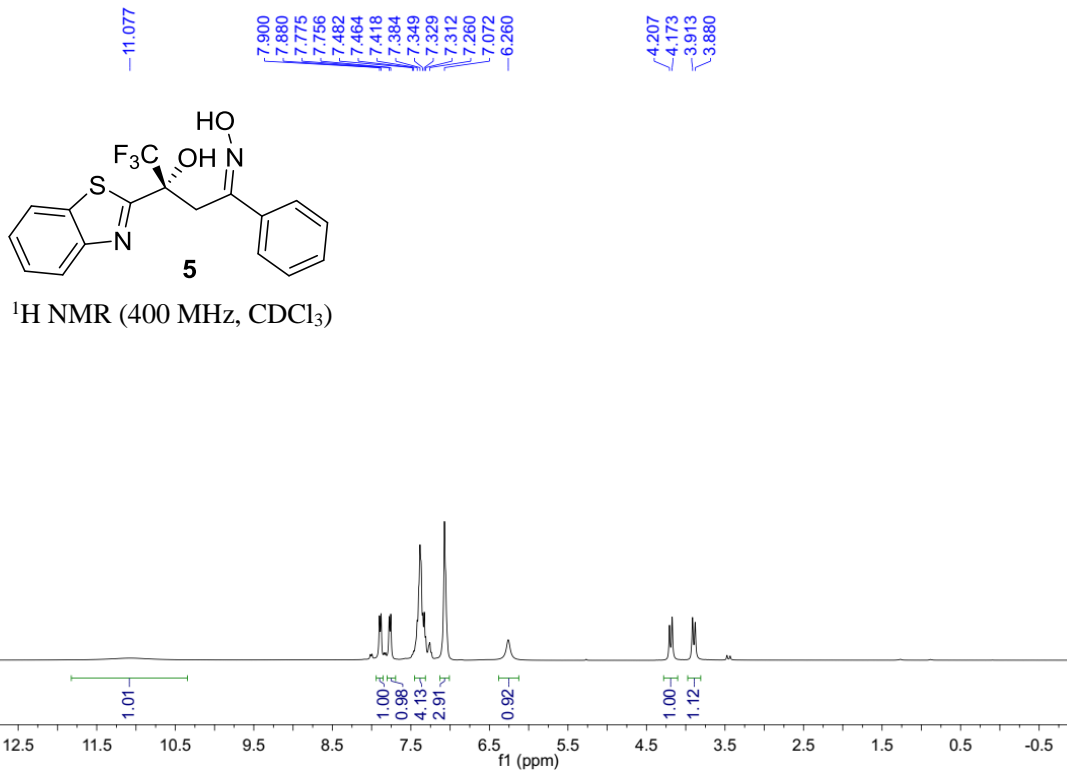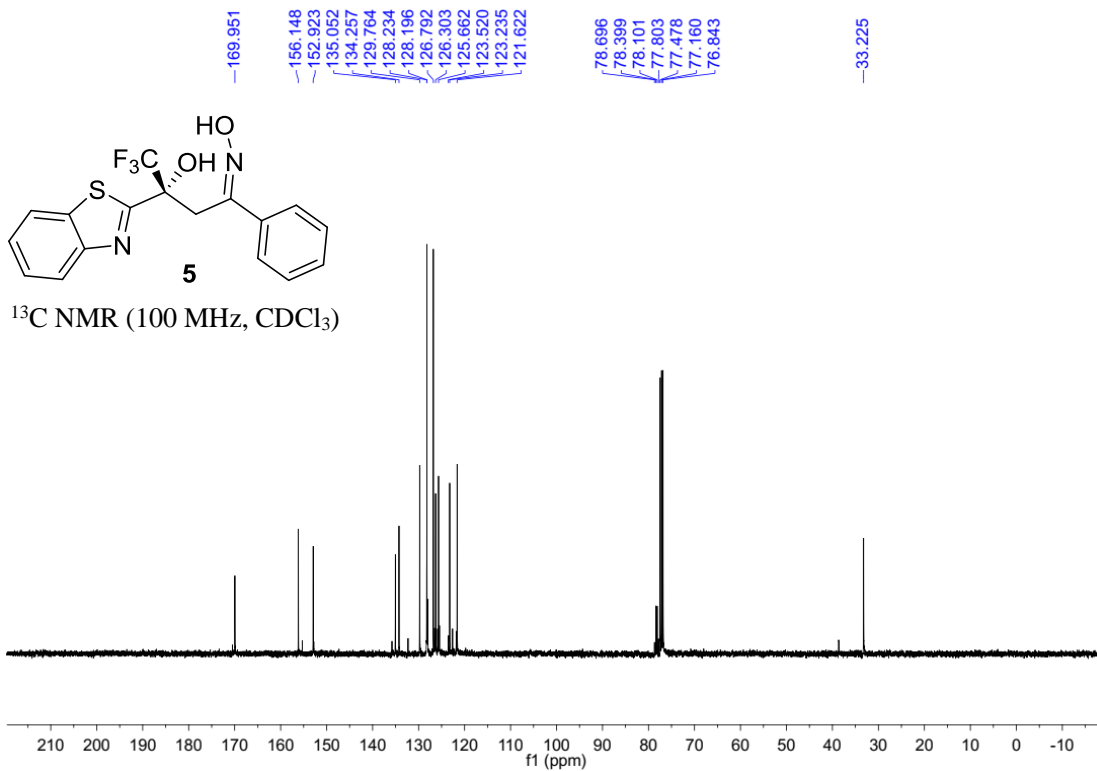

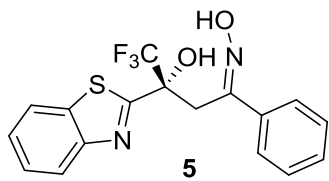

$^{19}\text{F}$  NMR (376.5 MHz,  $\text{CDCl}_3$ )

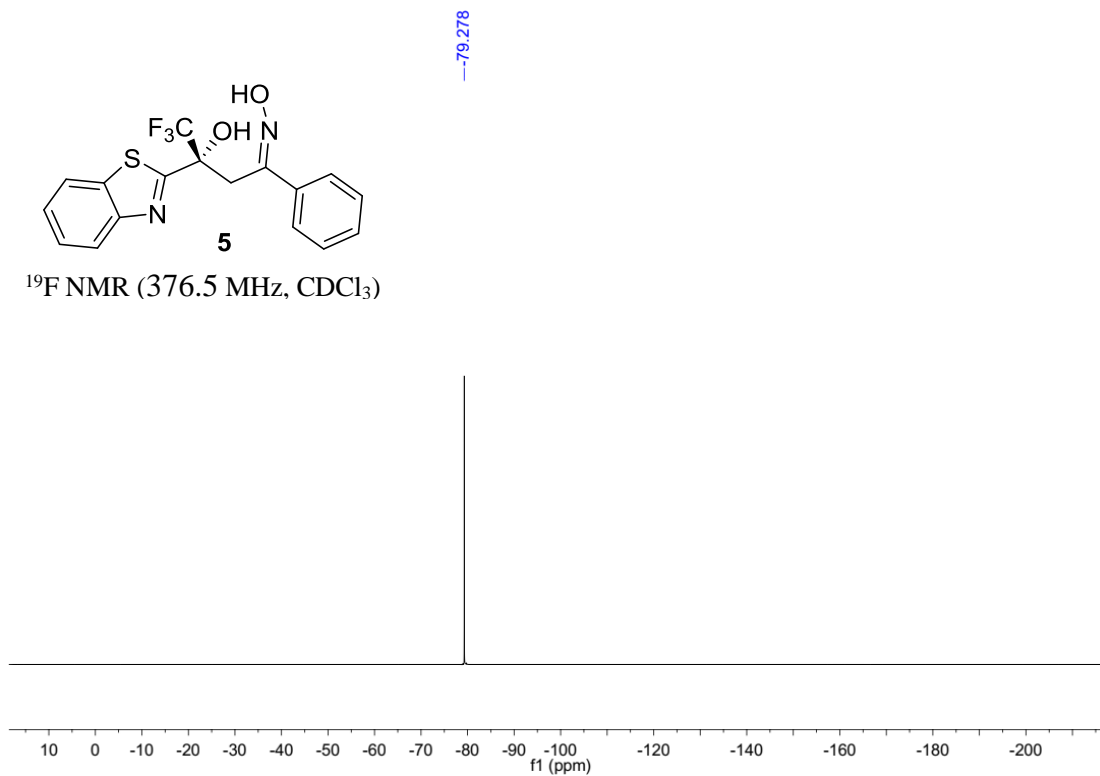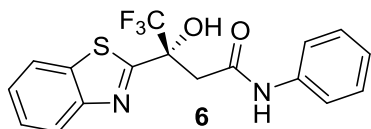

$^1\text{H}$  NMR (400 MHz,  $\text{CDCl}_3$ )

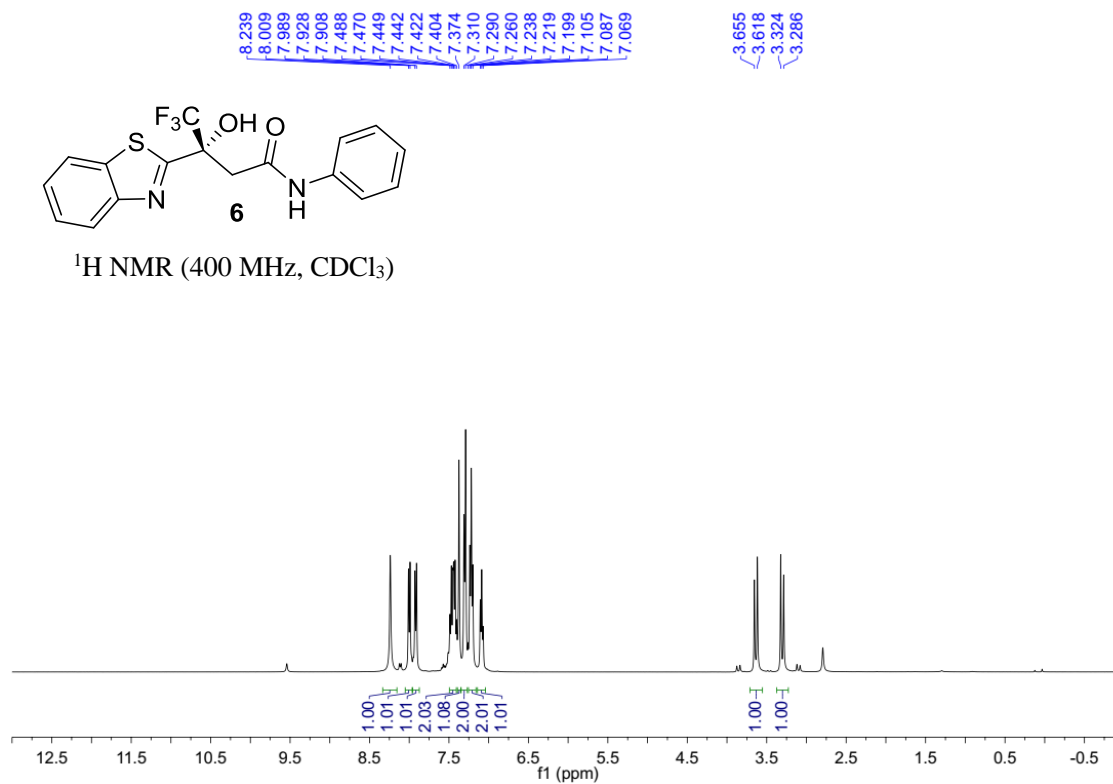

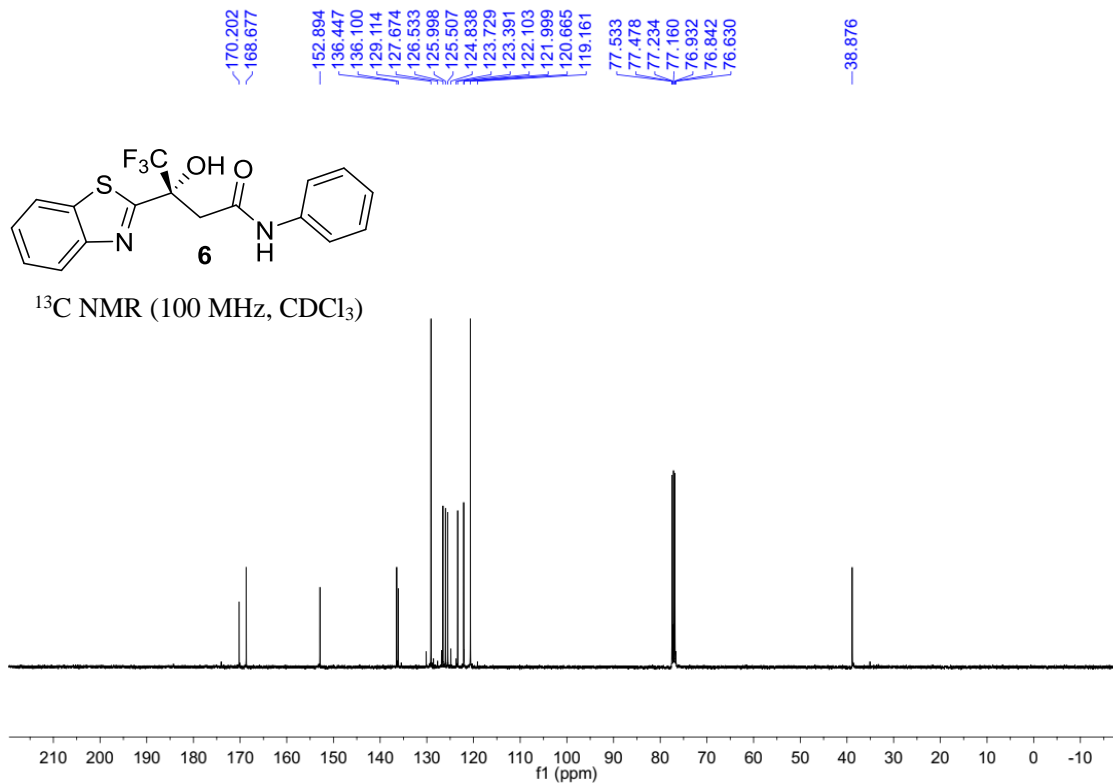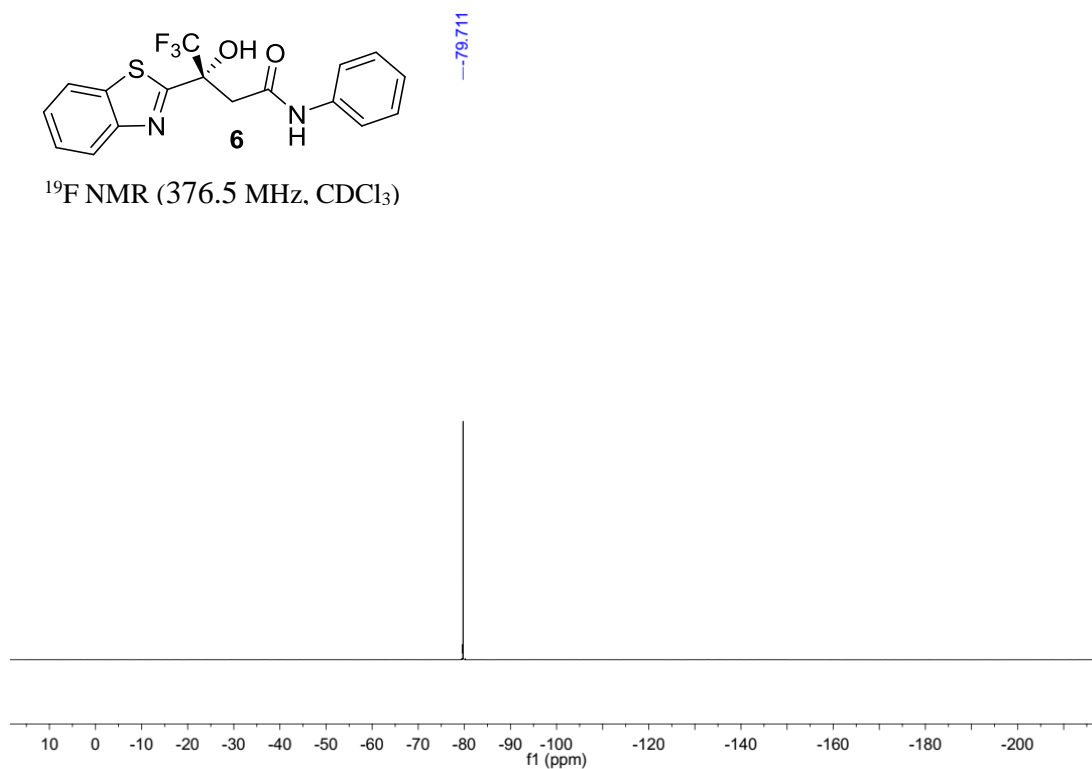

## VIII. HPLC Profiles

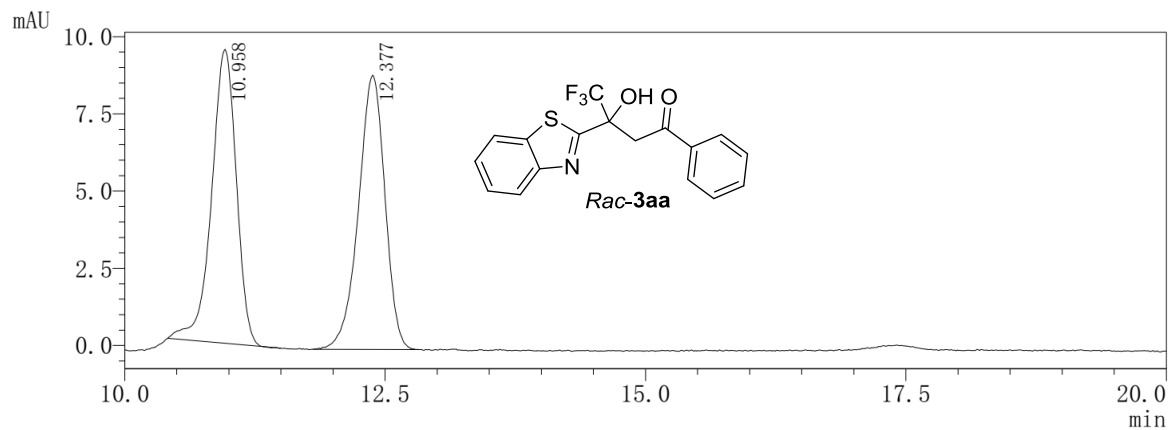

PDA Ch1 254nm 4nm

| Peak | Ret Time | Width | Area   | Height | Area % |
|------|----------|-------|--------|--------|--------|
| 1    | 10.958   | 0.433 | 156902 | 9520   | 49.921 |
| 2    | 12.377   | 0.472 | 157401 | 8883   | 50.079 |

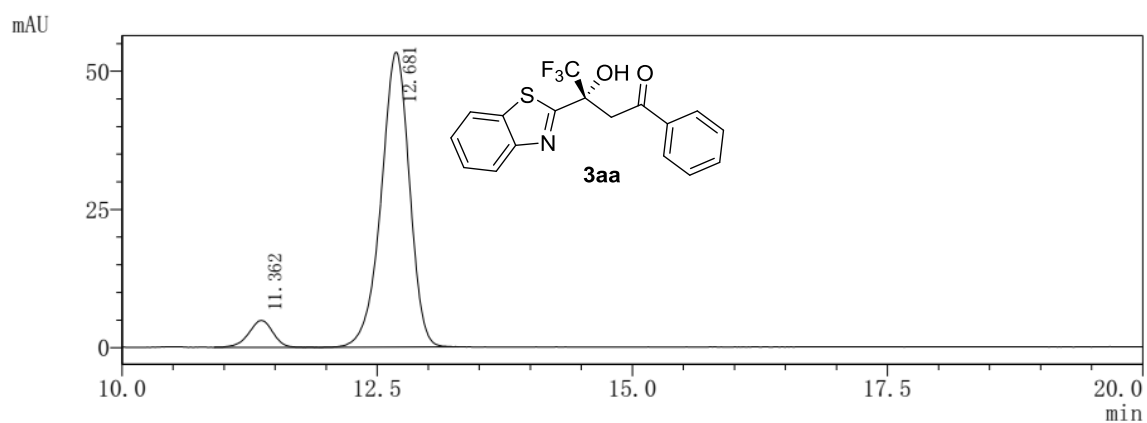

PDA Ch1 254nm 4nm

| Peak | Ret Time | Width | Area    | Height | Area % |
|------|----------|-------|---------|--------|--------|
| 1    | 11.362   | 0.436 | 80386   | 4869   | 7.253  |
| 2    | 12.681   | 0.509 | 1027981 | 53326  | 92.747 |

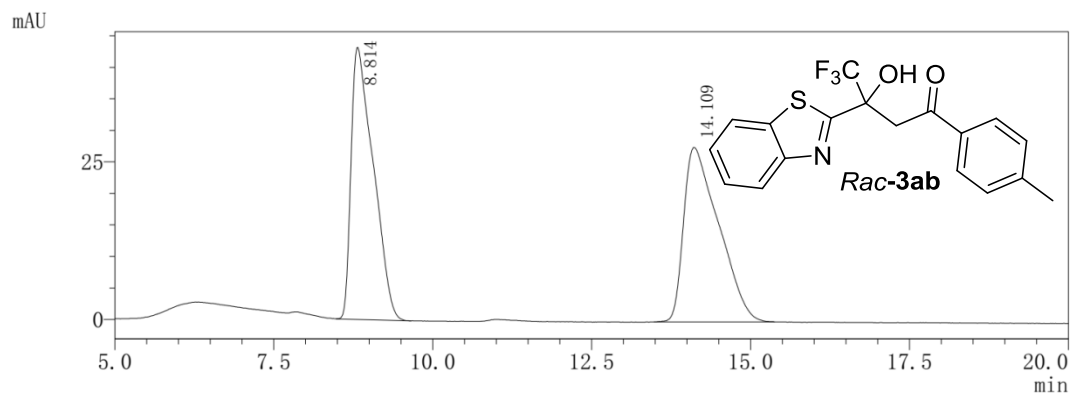

PDA Ch1 254nm 4nm

| Peak | Ret Time | Width | Area    | Height | Area % |
|------|----------|-------|---------|--------|--------|
| 1    | 8.814    | 0.694 | 1049078 | 43182  | 49.706 |
| 2    | 14.109   | 1.076 | 1061469 | 27693  | 50.294 |

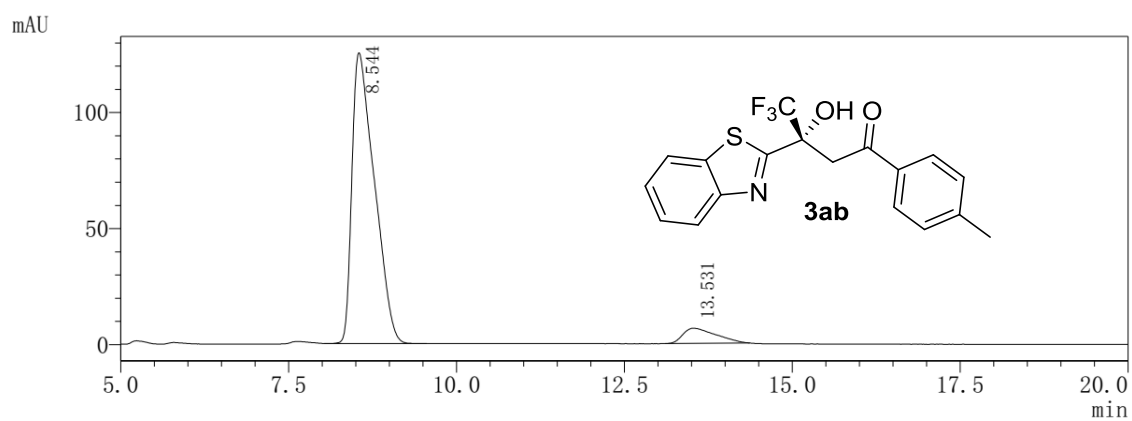

PDA Ch1 254nm 4nm

| Peak | Ret Time | Width | Area    | Height | Area % |
|------|----------|-------|---------|--------|--------|
| 1    | 8.544    | 0.655 | 2907221 | 125287 | 92.856 |
| 2    | 13.531   | 1.022 | 223661  | 6551   | 7.144  |



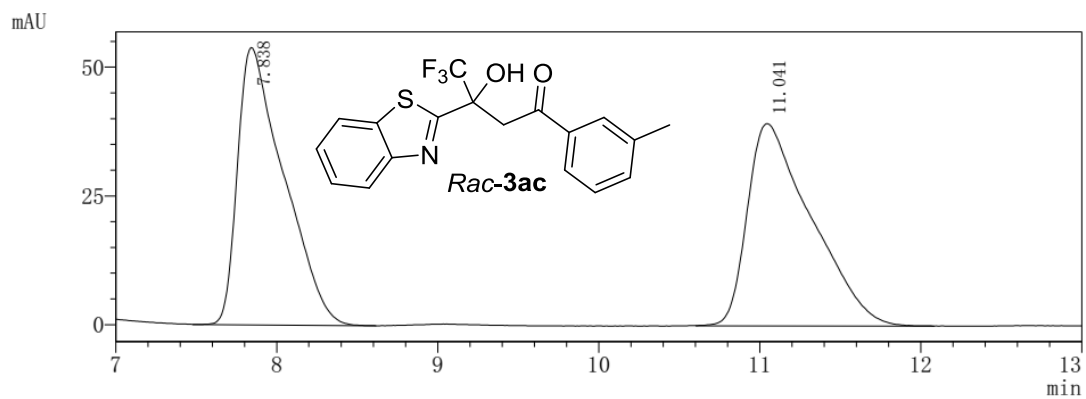

PDA Ch1 254nm 4nm

| Peak | Ret Time | Width | Area    | Height | Area % |
|------|----------|-------|---------|--------|--------|
| 1    | 7.838    | 0.529 | 1076466 | 53851  | 49.850 |
| 2    | 11.041   | 0.721 | 1082948 | 39279  | 50.150 |

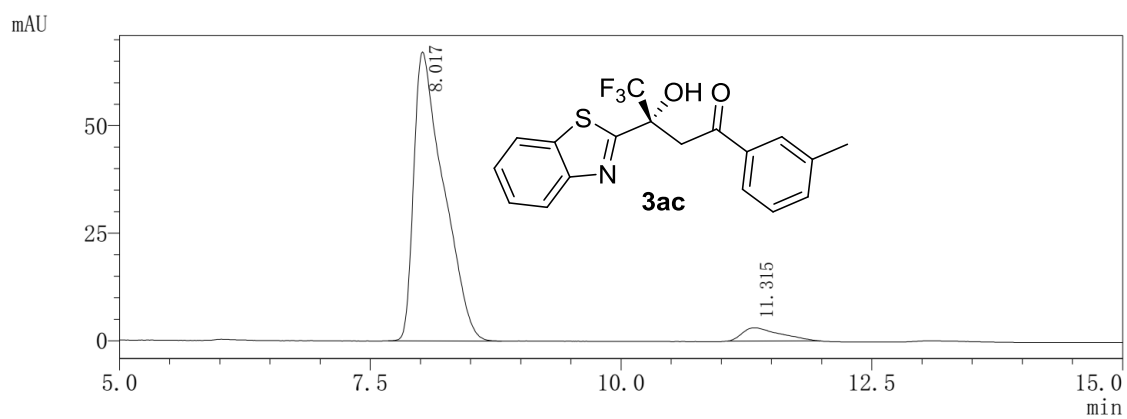

PDA Ch1 254nm 4nm

| Peak | Ret Time | Width | Area    | Height | Area % |
|------|----------|-------|---------|--------|--------|
| 1    | 8.017    | 0.540 | 1387194 | 67246  | 94.498 |
| 2    | 11.315   | 0.694 | 80764   | 3082   | 5.502  |

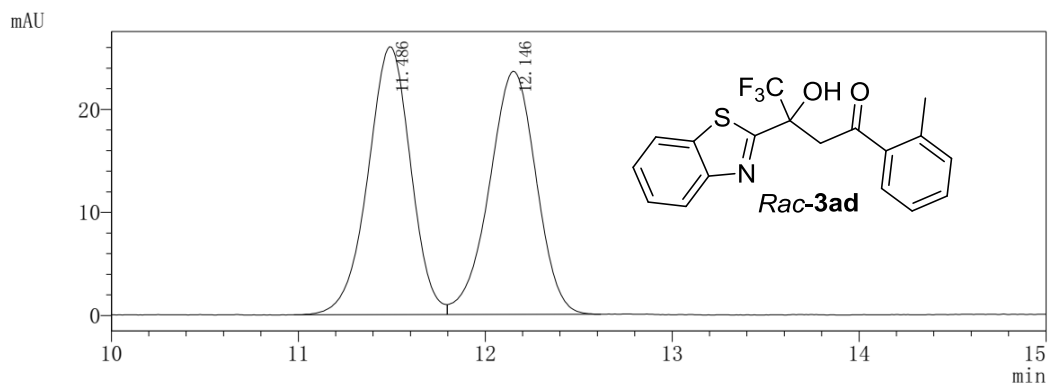

PDA Ch1 254nm 4nm

| Peak | Ret Time | Width | Area   | Height | Area % |
|------|----------|-------|--------|--------|--------|
| 1    | 11.486   | 0.426 | 414517 | 26011  | 50.232 |
| 2    | 12.146   | 0.467 | 410694 | 23617  | 49.768 |

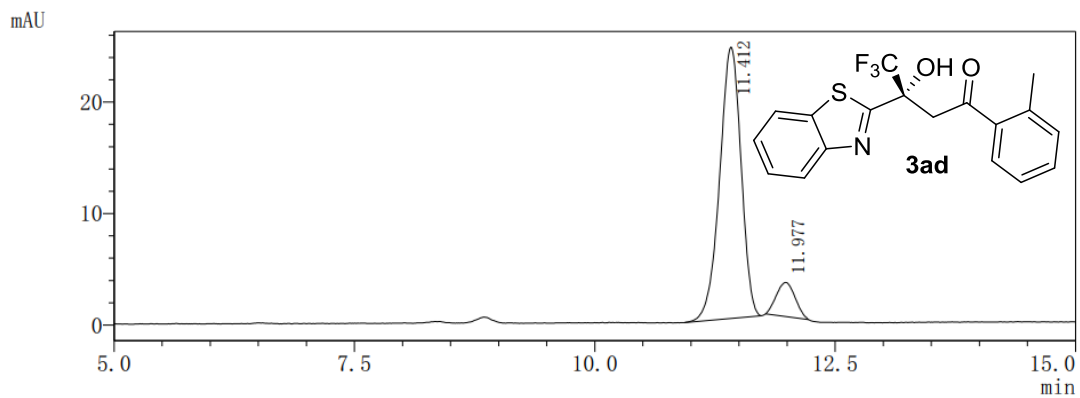

PDA Ch1 254nm 4nm

| Peak | Ret Time | Width | Area   | Height | Area % |
|------|----------|-------|--------|--------|--------|
| 1    | 11.412   | 0.417 | 375845 | 24348  | 90.059 |
| 2    | 11.977   | 0.382 | 41486  | 3042   | 9.941  |

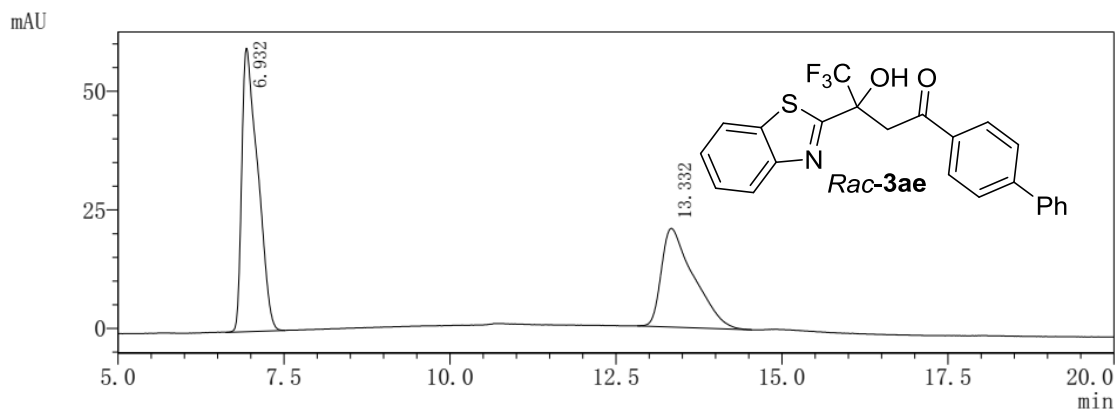

PDA Ch1 254nm 4nm

| Peak | Ret Time | Width | Area   | Height | Area % |
|------|----------|-------|--------|--------|--------|
| 1    | 6.932    | 0.494 | 998458 | 59785  | 58.668 |
| 2    | 13.332   | 0.852 | 703419 | 20813  | 41.332 |

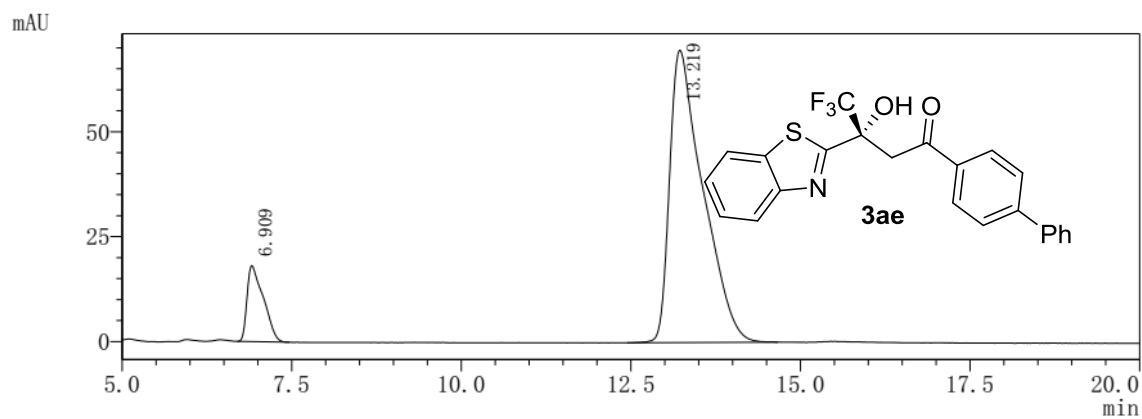

PDA Ch1 254nm 4nm

| Peak | Ret Time | Width | Area    | Height | Area % |
|------|----------|-------|---------|--------|--------|
| 1    | 6.909    | 0.493 | 302790  | 18121  | 11.265 |
| 2    | 13.219   | 0.868 | 2385070 | 69688  | 88.735 |

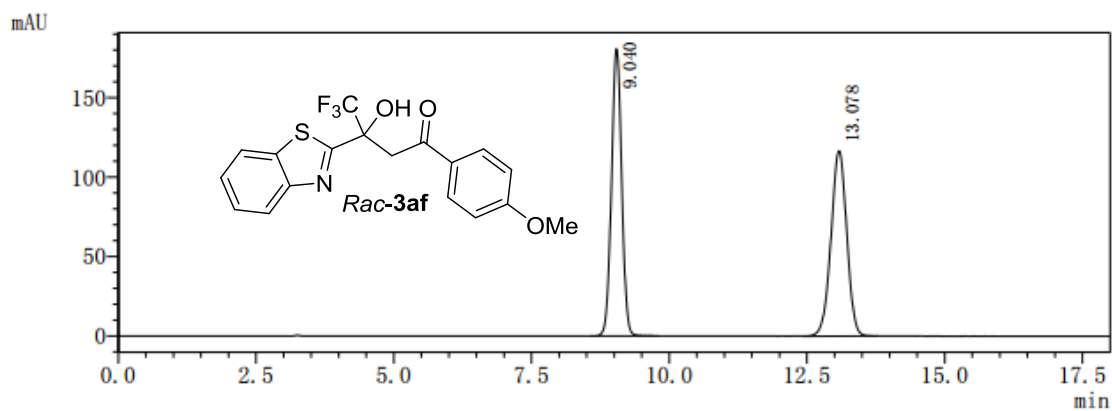

PDA Ch1 254nm 4nm

| Peak | Ret Time | Width | Area    | Height | Area % |
|------|----------|-------|---------|--------|--------|
| 1    | 9.040    | 0.349 | 2327578 | 180821 | 50.059 |
| 2    | 13.078   | 0.531 | 2322081 | 116518 | 49.941 |

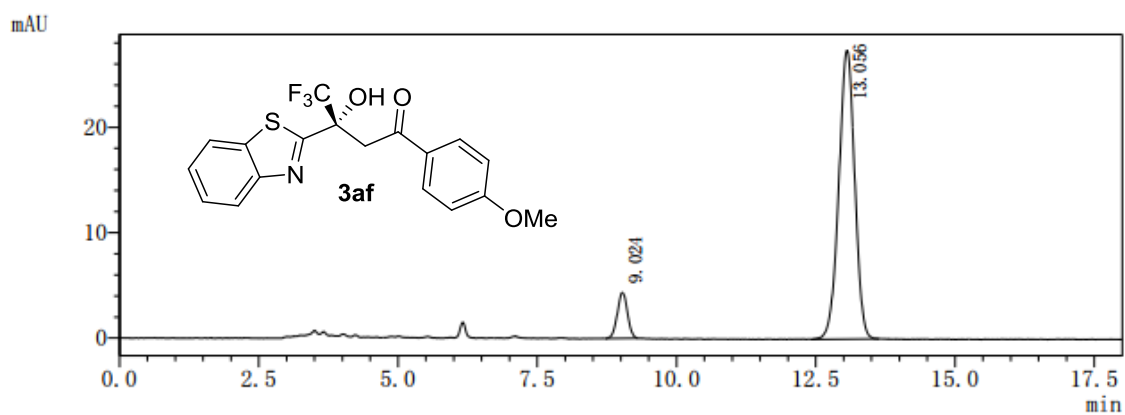

PDA Ch1 254nm 4nm

| Peak | Ret Time | Width | Area   | Height | Area % |
|------|----------|-------|--------|--------|--------|
| 1    | 9.024    | 0.348 | 55506  | 4363   | 9.233  |
| 2    | 13.056   | 0.532 | 545666 | 27369  | 90.767 |

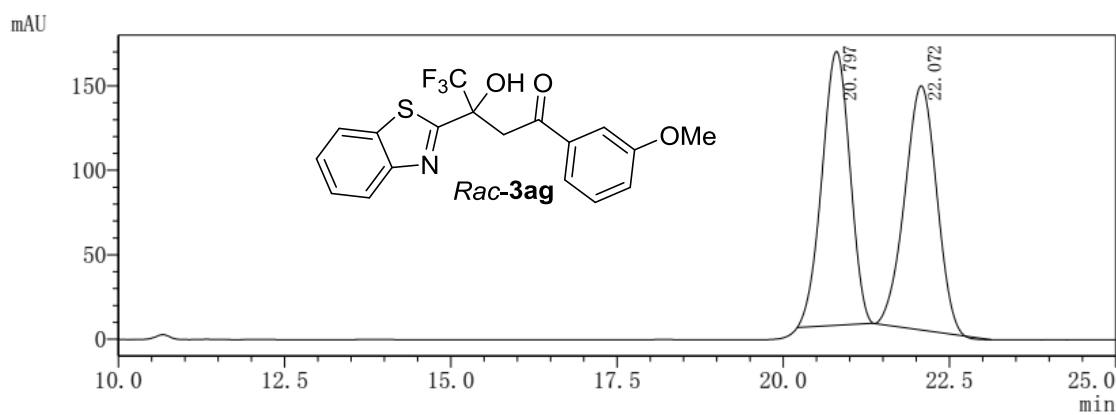

PDA Ch1 254nm 4nm

| Peak | Ret Time | Width | Area    | Height | Area % |
|------|----------|-------|---------|--------|--------|
| 1    | 20.797   | 0.790 | 4737246 | 162171 | 49.658 |
| 2    | 22.072   | 0.900 | 4802425 | 144527 | 50.342 |

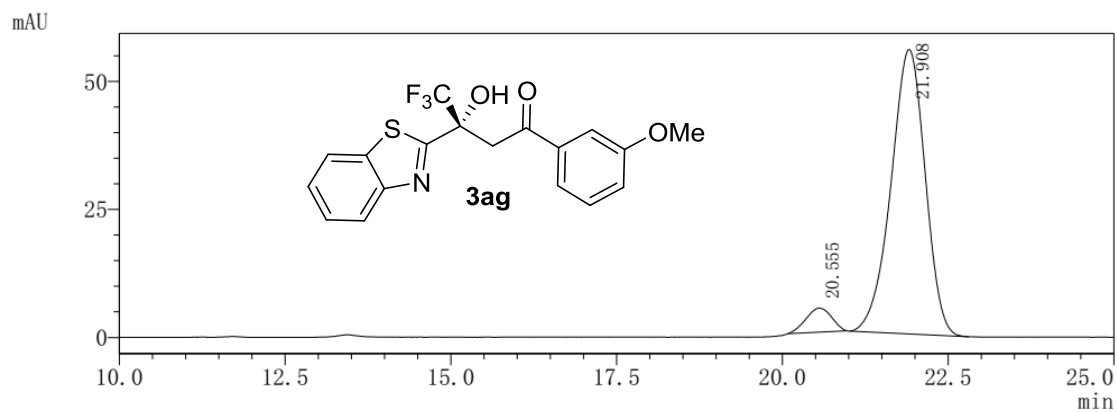

PDA Ch1 254nm 4nm

| Peak | Ret Time | Width | Area    | Height | Area % |
|------|----------|-------|---------|--------|--------|
| 1    | 20.555   | 0.737 | 126139  | 4707   | 5.965  |
| 2    | 21.908   | 0.949 | 1988638 | 55528  | 94.035 |

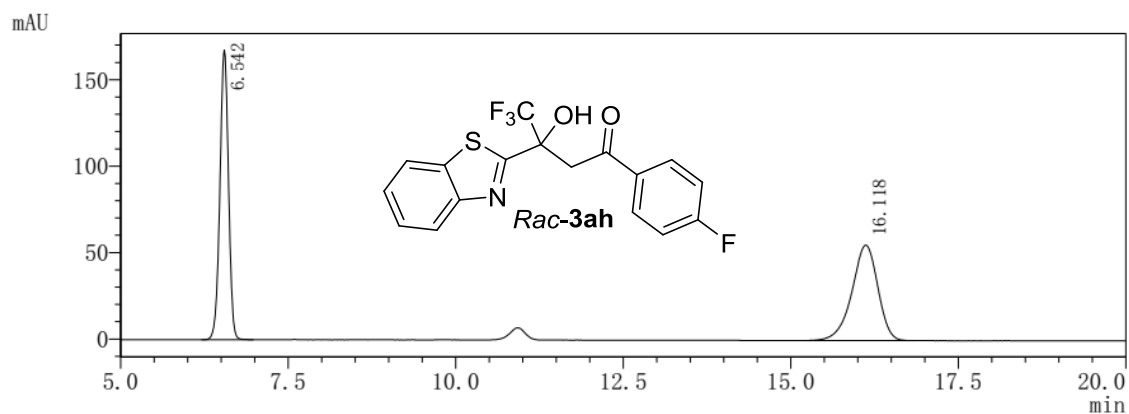

PDA Ch1 254nm 4nm

| Peak | Ret Time | Width | Area    | Height | Area % |
|------|----------|-------|---------|--------|--------|
| 1    | 6.542    | 0.248 | 1492994 | 167707 | 50.086 |
| 2    | 16.118   | 0.707 | 1487854 | 55173  | 49.914 |

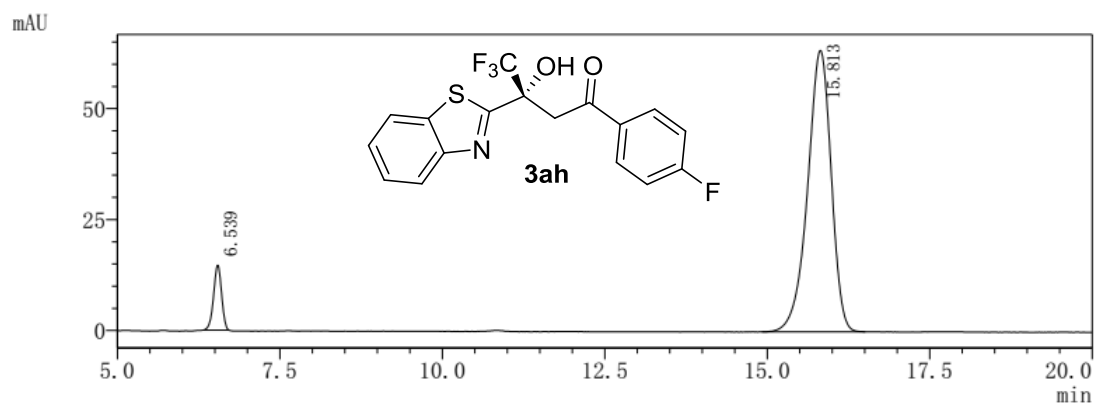

PDA Ch1 254nm 4nm

| Peak | Ret Time | Width | Area    | Height | Area % |
|------|----------|-------|---------|--------|--------|
| 1    | 6.539    | 0.241 | 125308  | 14607  | 7.246  |
| 2    | 15.813   | 0.665 | 1604004 | 63436  | 92.754 |

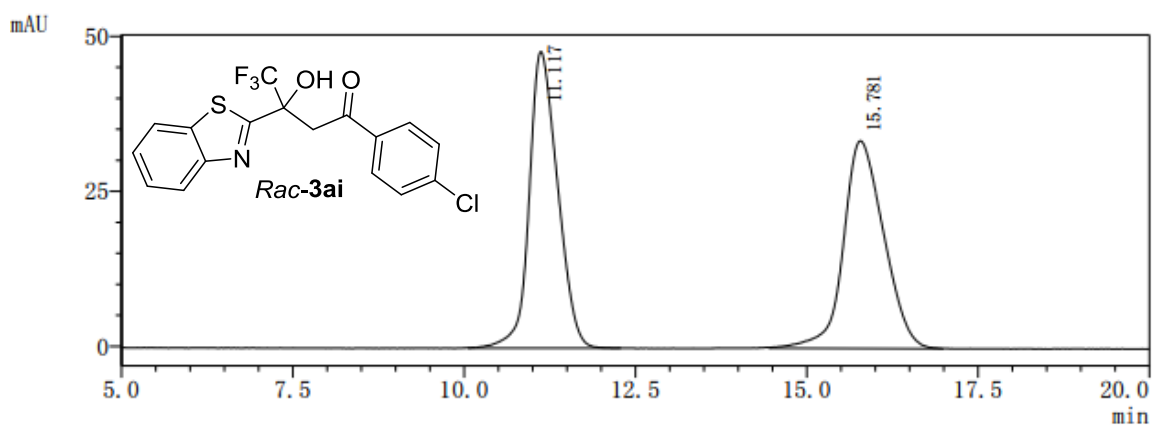

PDA Ch1 254nm 4nm

| Peak | Ret Time | Width | Area    | Height | Area % |
|------|----------|-------|---------|--------|--------|
| 1    | 11.117   | 0.772 | 1383258 | 47855  | 50.155 |
| 2    | 15.781   | 1.083 | 1374713 | 33490  | 49.845 |

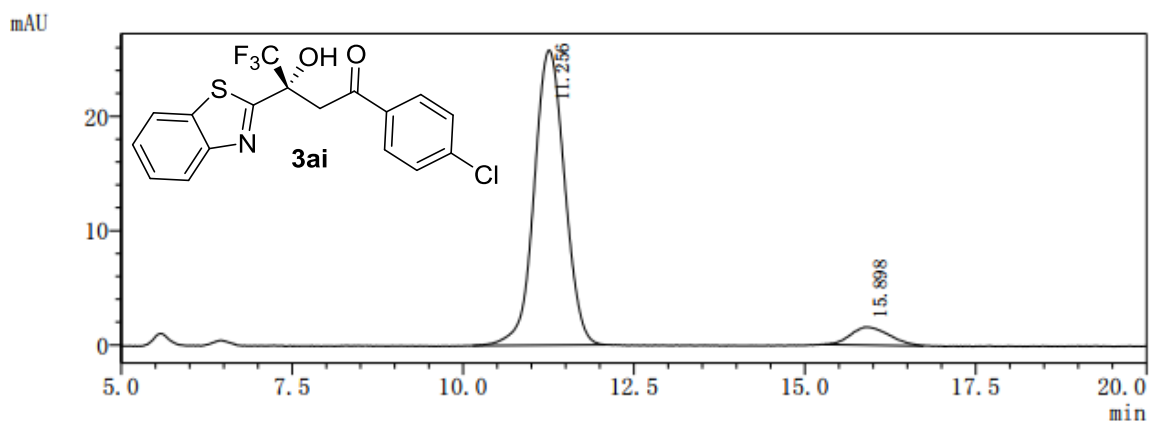

PDA Ch1 254nm 4nm

| Peak | Ret Time | Width | Area   | Height | Area % |
|------|----------|-------|--------|--------|--------|
| 1    | 11.256   | 0.806 | 800755 | 25786  | 92.833 |
| 2    | 15.898   | 1.058 | 61825  | 1586   | 7.167  |

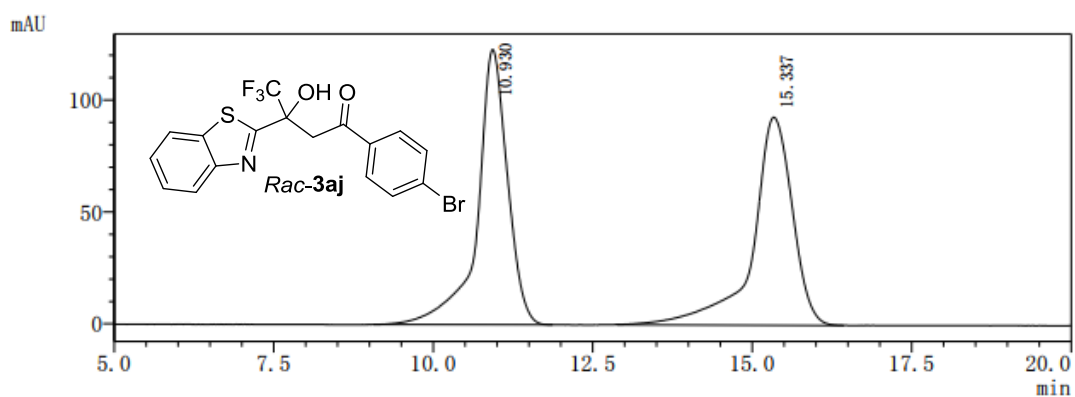

PDA Ch1 254nm 4nm

| Peak | Ret Time | Width | Area    | Height | Area % |
|------|----------|-------|---------|--------|--------|
| 1    | 10.930   | 0.773 | 4066488 | 123037 | 50.121 |
| 2    | 15.337   | 0.976 | 4046865 | 92928  | 49.879 |

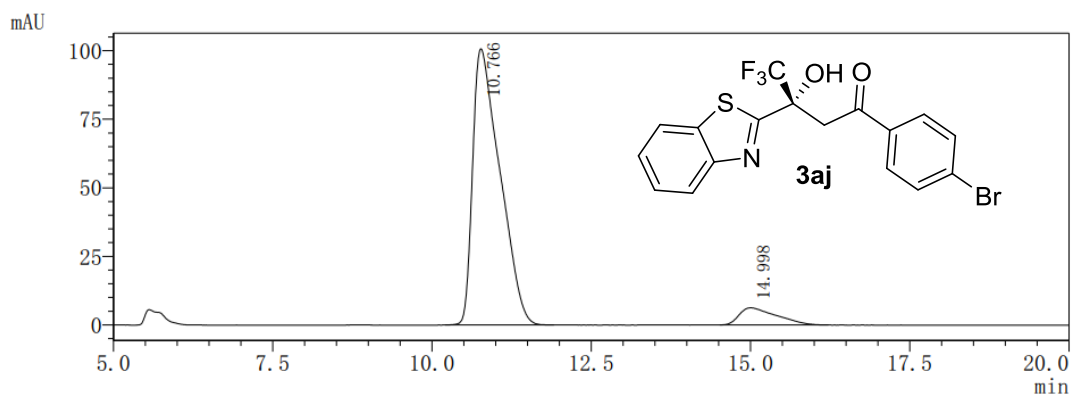

PDA Ch1 254nm 4nm

| Peak | Ret Time | Width | Area    | Height | Area % |
|------|----------|-------|---------|--------|--------|
| 1    | 10.766   | 0.830 | 3006900 | 100792 | 92.212 |
| 2    | 14.998   | 1.206 | 253960  | 6242   | 7.788  |



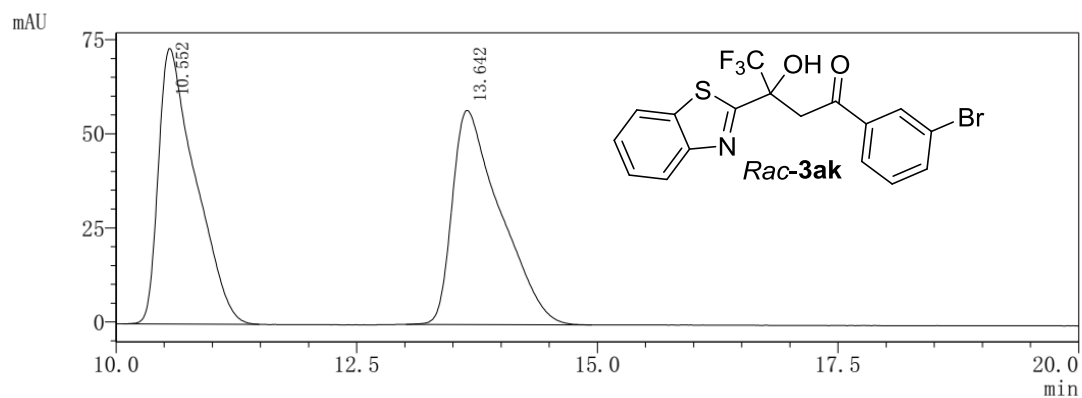

PDA Ch1 254nm 4nm

| Peak | Ret Time | Width | Area    | Height | Area % |
|------|----------|-------|---------|--------|--------|
| 1    | 10.552   | 0.688 | 1956424 | 73210  | 49.741 |
| 2    | 13.642   | 0.890 | 1976808 | 56895  | 50.259 |

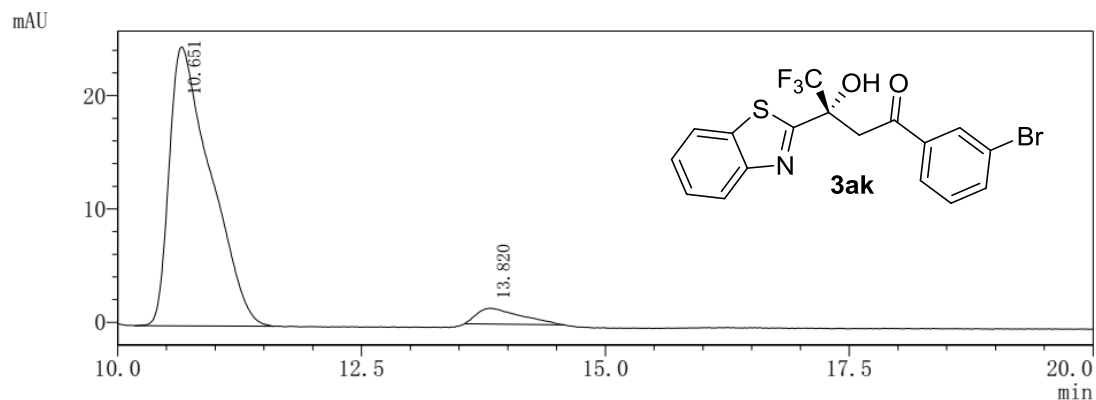

PDA Ch1 254nm 4nm

| Peak | Ret Time | Width | Area   | Height | Area % |
|------|----------|-------|--------|--------|--------|
| 1    | 10.651   | 0.769 | 729617 | 24622  | 94.338 |
| 2    | 13.820   | 0.942 | 43791  | 1396   | 5.662  |

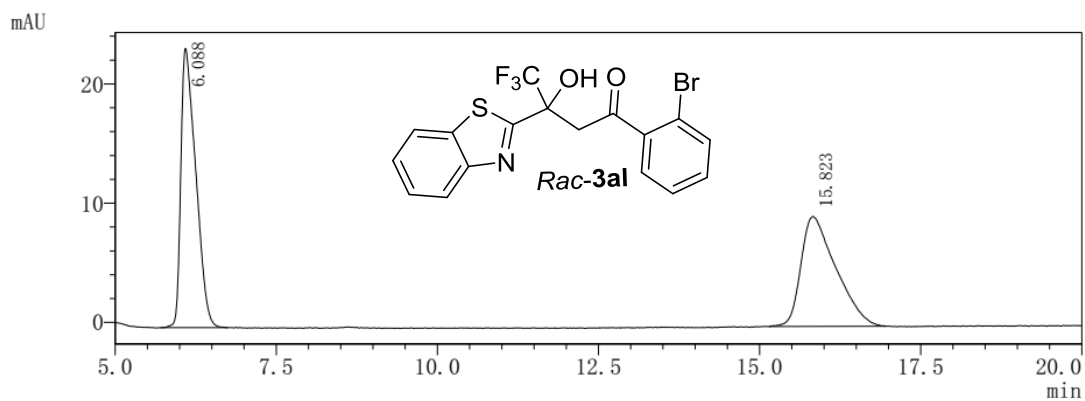

PDA Ch1 254nm 4nm

| Peak | Ret Time | Width | Area   | Height | Area % |
|------|----------|-------|--------|--------|--------|
| 1    | 6.088    | 0.465 | 376957 | 23434  | 52.024 |
| 2    | 15.823   | 1.043 | 347621 | 9208   | 47.976 |

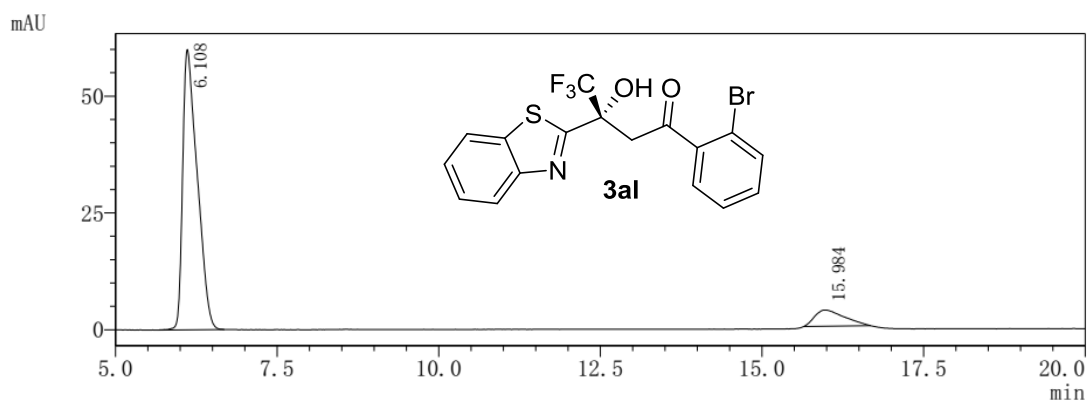

PDA Ch1 254nm 4nm

| Peak | Ret Time | Width | Area   | Height | Area % |
|------|----------|-------|--------|--------|--------|
| 1    | 6.108    | 0.447 | 938434 | 60033  | 89.368 |
| 2    | 15.984   | 0.939 | 111642 | 3482   | 10.632 |

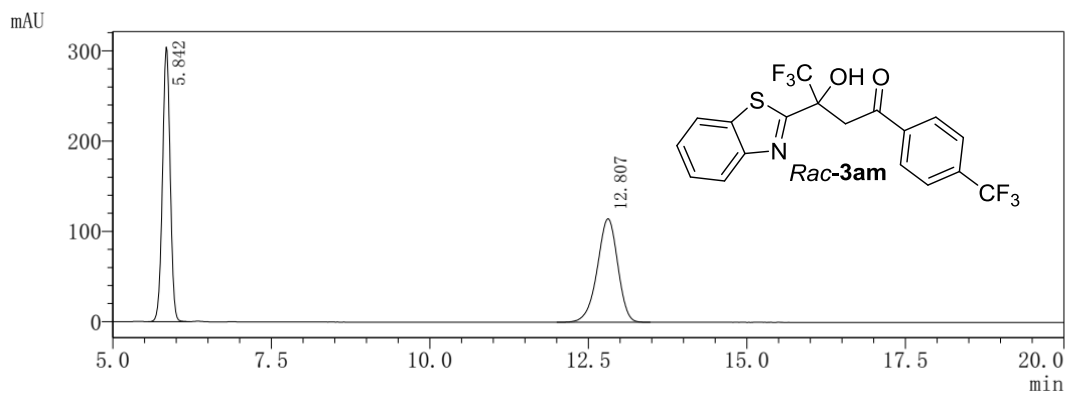

PDA Ch1 254nm 4nm

| Peak | Ret Time | Width | Area    | Height | Area % |
|------|----------|-------|---------|--------|--------|
| 1    | 5.842    | 0.236 | 2557638 | 304291 | 49.849 |
| 2    | 12.807   | 0.593 | 2573152 | 114692 | 50.151 |

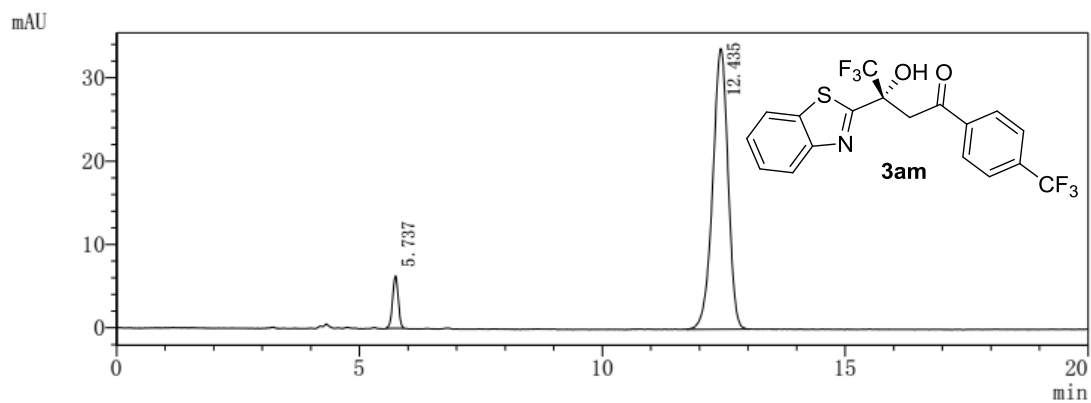

PDA Ch1 254nm 4nm

| Peak | Ret Time | Width | Area   | Height | Area % |
|------|----------|-------|--------|--------|--------|
| 1    | 5.737    | 0.233 | 51728  | 6300   | 6.560  |
| 2    | 12.435   | 0.579 | 736753 | 33666  | 93.440 |

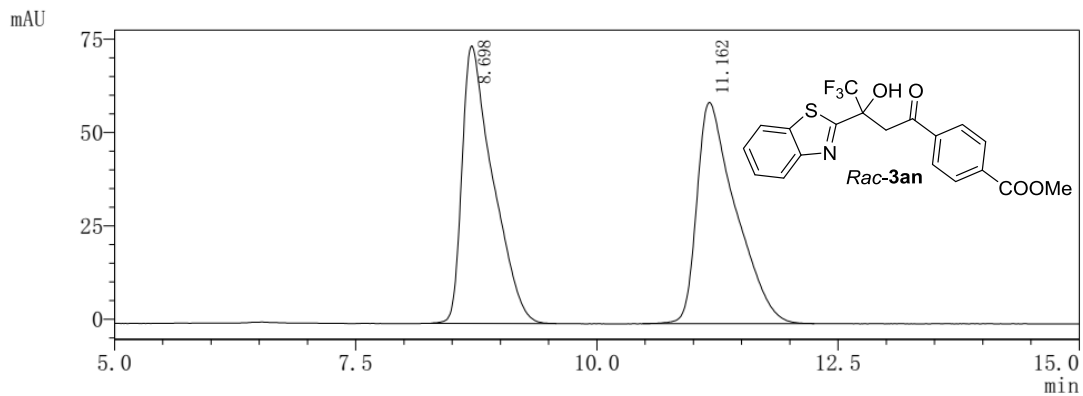

PDA Ch1 254nm 4nm

| Peak | Ret Time | Width | Area    | Height | Area % |
|------|----------|-------|---------|--------|--------|
| 1    | 8.698    | 0.571 | 1653223 | 74356  | 49.953 |
| 2    | 11.162   | 0.719 | 1656343 | 59248  | 50.047 |

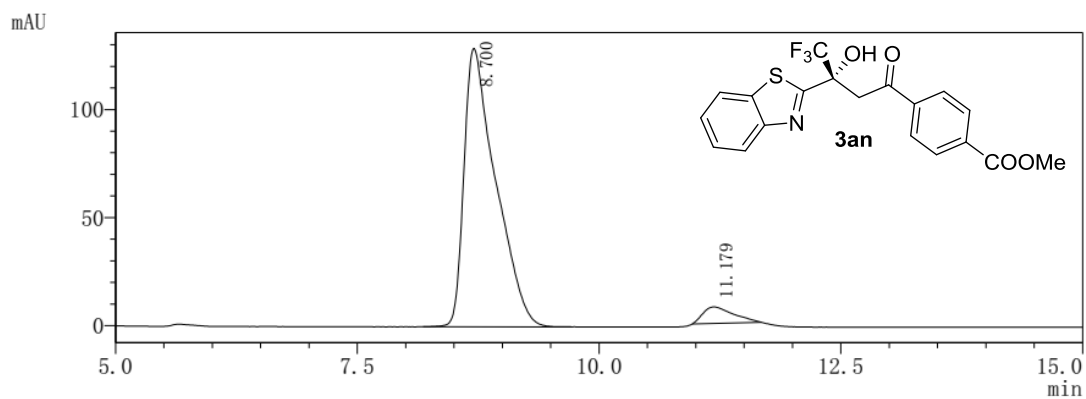

PDA Ch1 254nm 4nm

| Peak | Ret Time | Width | Area    | Height | Area % |
|------|----------|-------|---------|--------|--------|
| 1    | 8.700    | 0.581 | 2939408 | 128947 | 94.609 |
| 2    | 11.179   | 0.596 | 167508  | 7668   | 5.391  |

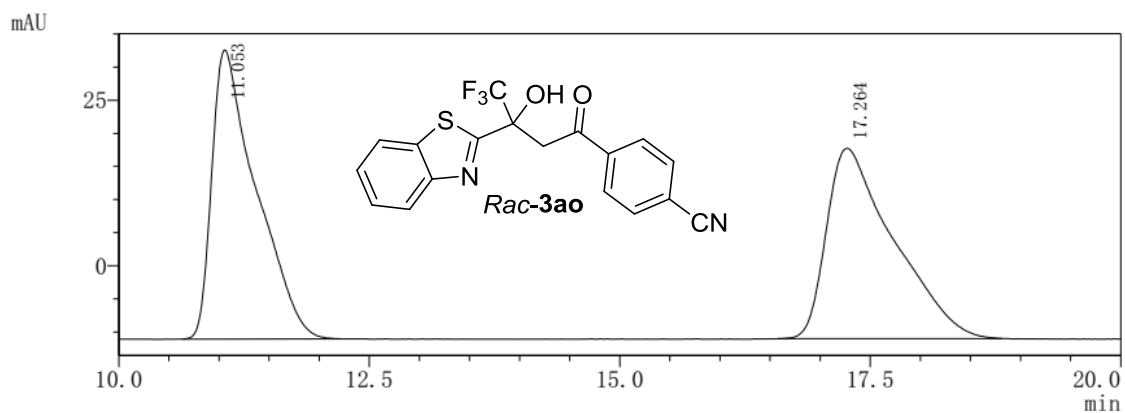

PDA Ch1 254nm 4nm

| Peak | Ret Time | Width | Area    | Height | Area % |
|------|----------|-------|---------|--------|--------|
| 1    | 11.053   | 0.753 | 1346788 | 43678  | 50.179 |
| 2    | 17.264   | 1.166 | 1337173 | 28738  | 49.821 |

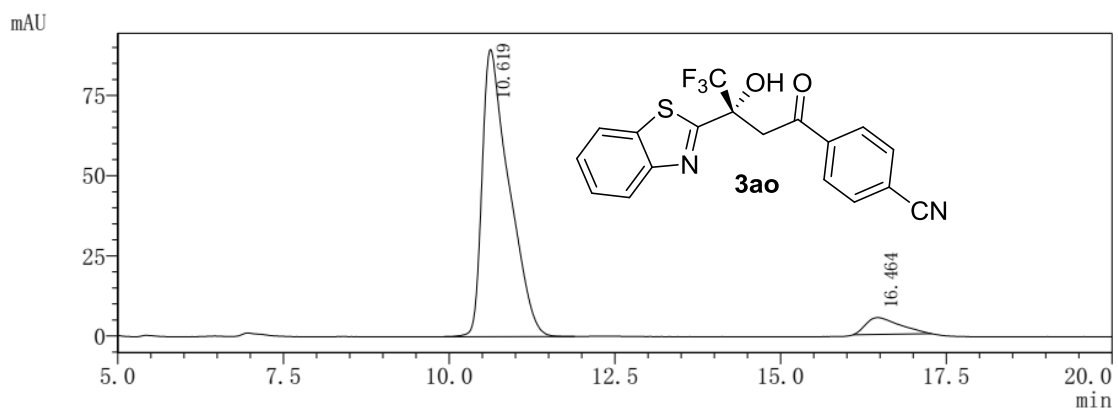

PDA Ch1 254nm 4nm

| Peak | Ret Time | Width | Area    | Height | Area % |
|------|----------|-------|---------|--------|--------|
| 1    | 10.619   | 0.731 | 2535233 | 89544  | 93.118 |
| 2    | 16.464   | 1.054 | 187362  | 5277   | 6.882  |

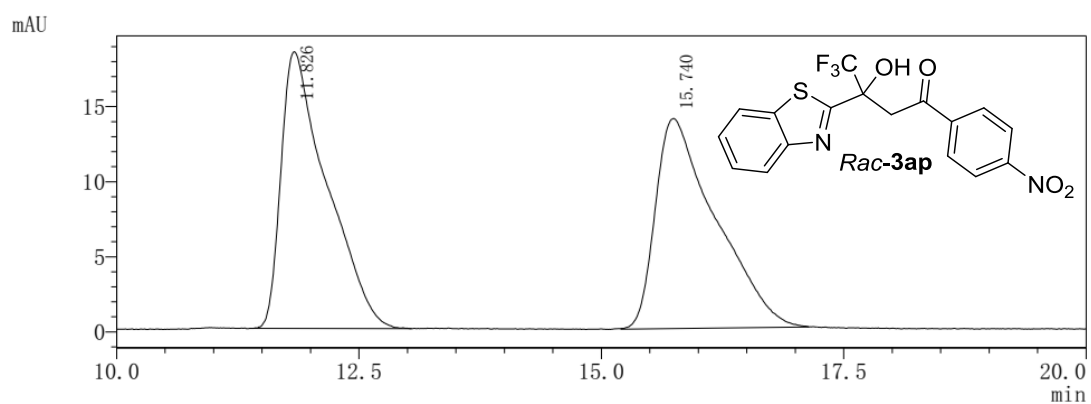

PDA Ch1 254nm 4nm

| Peak | Ret Time | Width | Area   | Height | Area % |
|------|----------|-------|--------|--------|--------|
| 1    | 11.826   | 0.797 | 606886 | 18440  | 50.086 |
| 2    | 15.740   | 1.064 | 604813 | 14001  | 49.914 |

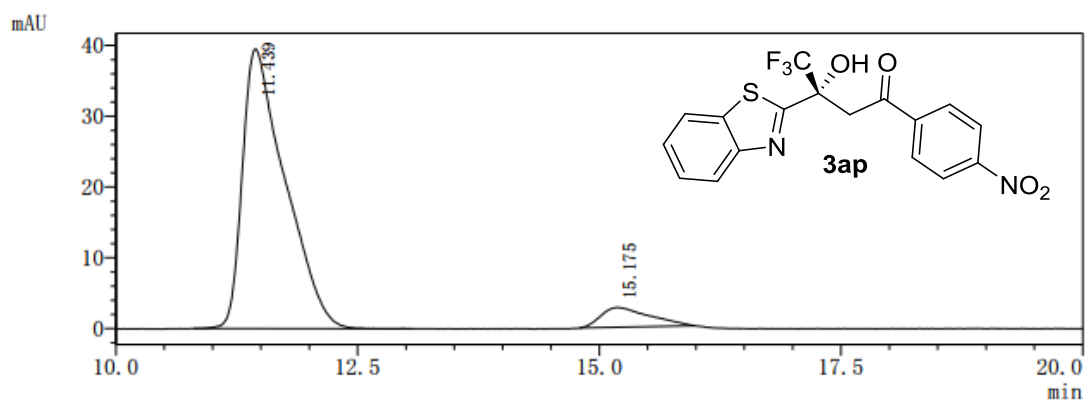

PDA Ch1 254nm 4nm

| Peak | Ret Time | Width | Area    | Height | Area % |
|------|----------|-------|---------|--------|--------|
| 1    | 11.439   | 0.790 | 1213465 | 39524  | 92.527 |
| 2    | 15.175   | 1.038 | 98002   | 2797   | 7.473  |

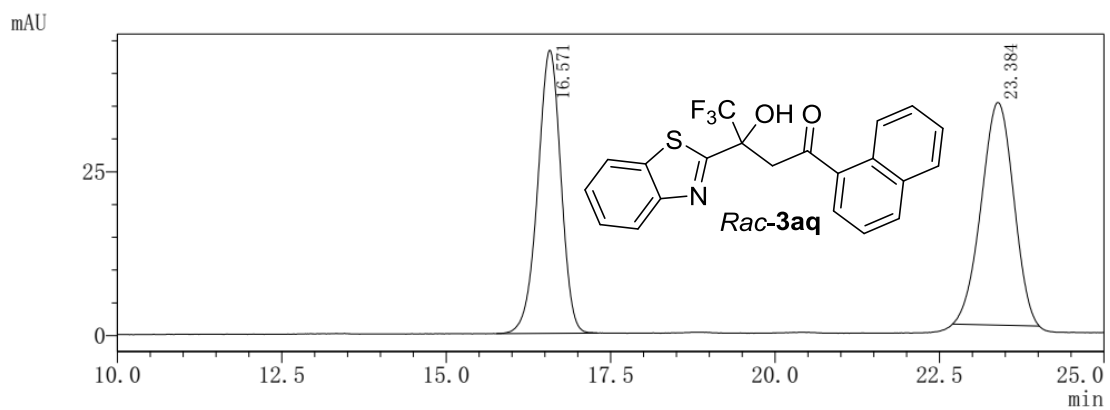

PDA Ch1 254nm 4nm

| Peak | Ret Time | Width | Area    | Height | Area % |
|------|----------|-------|---------|--------|--------|
| 1    | 16.571   | 0.646 | 1056536 | 43223  | 47.568 |
| 2    | 23.384   | 0.926 | 1164589 | 33991  | 52.432 |

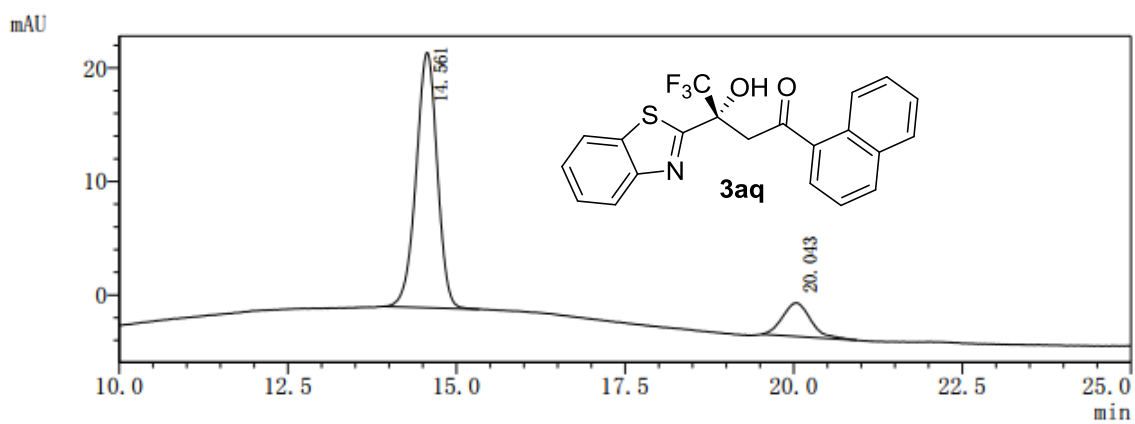

PDA Ch1 254nm 4nm

| Peak | Ret Time | Width | Area   | Height | Area % |
|------|----------|-------|--------|--------|--------|
| 1    | 14.561   | 0.580 | 493124 | 22493  | 85.120 |
| 2    | 20.043   | 0.771 | 86201  | 2952   | 14.880 |

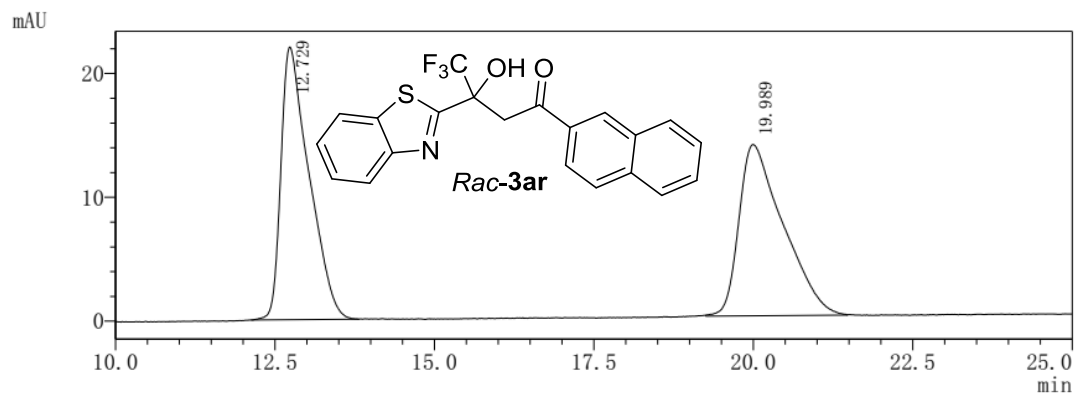

PDA Ch1 254nm 4nm

| Peak | Ret Time | Width | Area   | Height | Area % |
|------|----------|-------|--------|--------|--------|
| 1    | 12.729   | 0.801 | 674407 | 22035  | 50.278 |
| 2    | 19.989   | 1.384 | 666936 | 13842  | 49.722 |

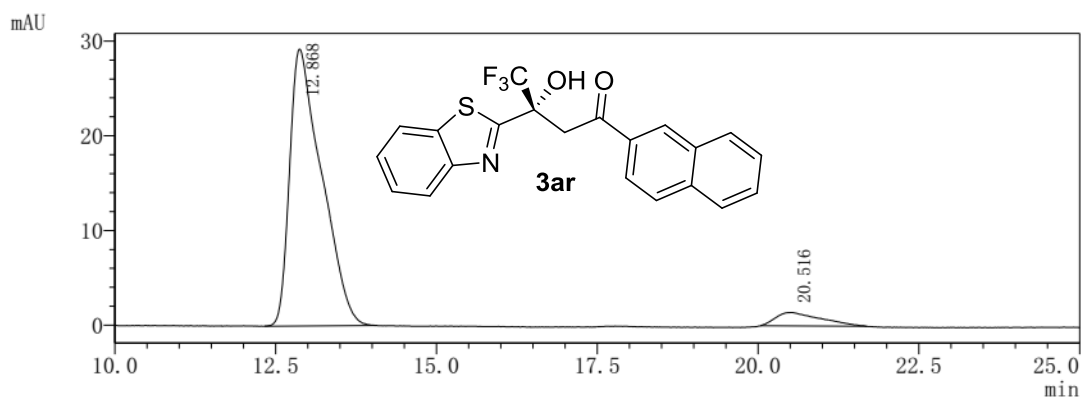

PDA Ch1 254nm 4nm

| Peak | Ret Time | Width | Area    | Height | Area % |
|------|----------|-------|---------|--------|--------|
| 1    | 12.868   | 0.903 | 1014748 | 29243  | 93.720 |
| 2    | 20.516   | 1.444 | 67998   | 1403   | 6.280  |



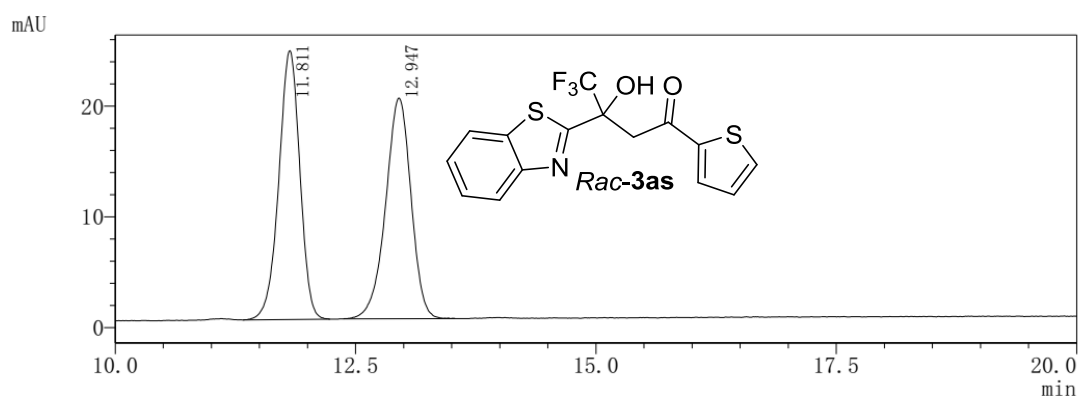

PDA Ch1 254nm 4nm

| Peak | Ret Time | Width | Area   | Height | Area % |
|------|----------|-------|--------|--------|--------|
| 1    | 11.811   | 0.407 | 369527 | 24300  | 50.189 |
| 2    | 12.947   | 0.486 | 366749 | 19940  | 49.811 |

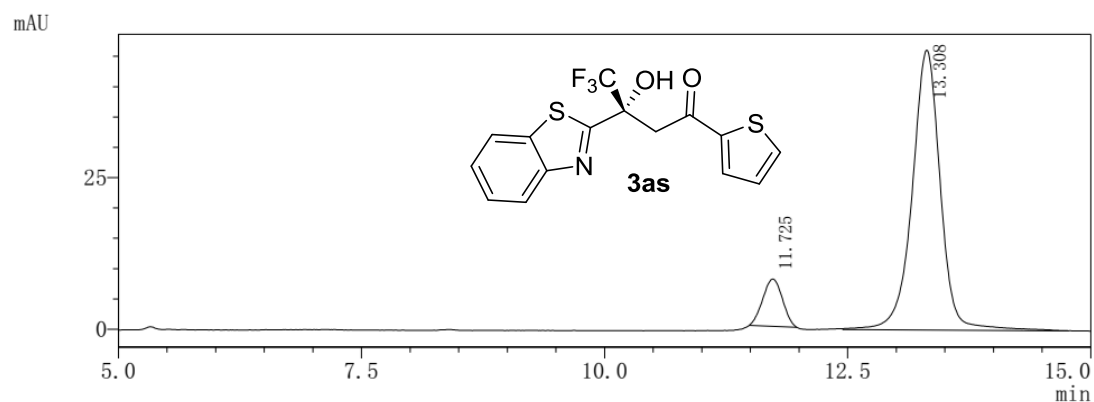

PDA Ch1 254nm 4nm

| Peak | Ret Time | Width | Area   | Height | Area % |
|------|----------|-------|--------|--------|--------|
| 1    | 11.725   | 0.392 | 109779 | 7791   | 10.528 |
| 2    | 13.308   | 0.509 | 932911 | 46151  | 89.472 |

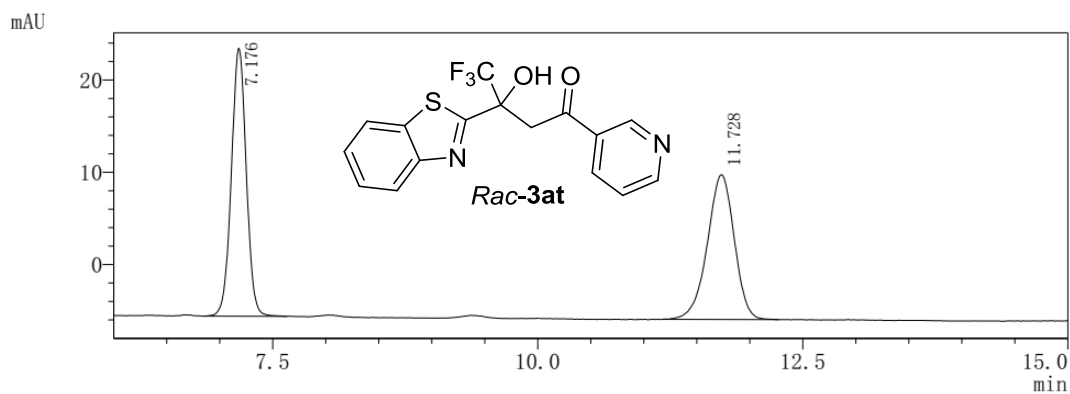

PDA Ch1 254nm 4nm

| Peak | Ret Time | Width | Area   | Height | Area % |
|------|----------|-------|--------|--------|--------|
| 1    | 7.176    | 0.269 | 284473 | 29027  | 50.581 |
| 2    | 11.728   | 0.471 | 277941 | 15675  | 49.419 |

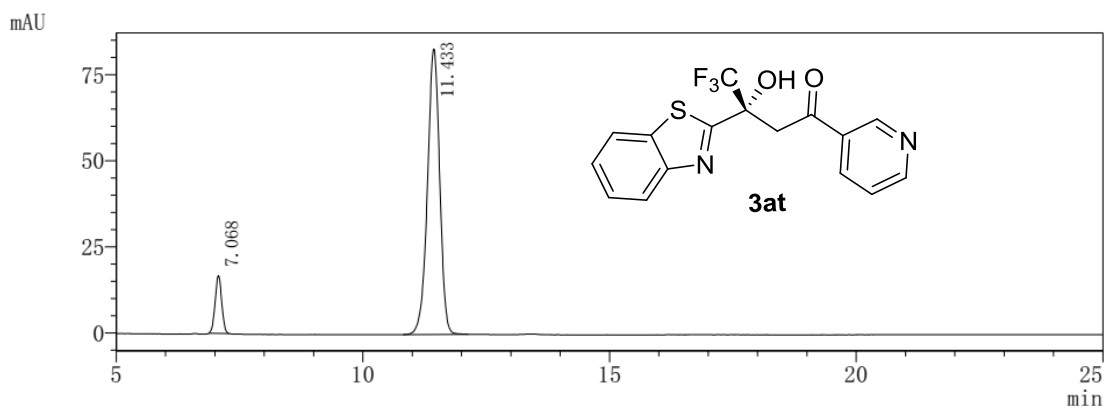

PDA Ch1 254nm 4nm

| Peak | Ret Time | Width | Area    | Height | Area % |
|------|----------|-------|---------|--------|--------|
| 1    | 7.068    | 0.261 | 155757  | 16761  | 9.823  |
| 2    | 11.433   | 0.457 | 1429879 | 82956  | 90.177 |

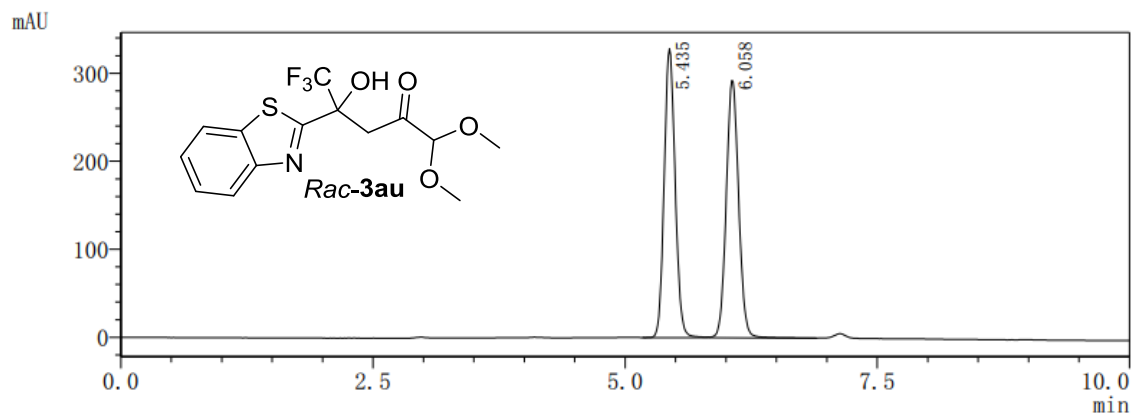

PDA Ch1 254nm 4nm

| Peak | Ret Time | Width | Area    | Height | Area % |
|------|----------|-------|---------|--------|--------|
| 1    | 5.435    | 0.216 | 2484001 | 328150 | 49.844 |
| 2    | 6.058    | 0.239 | 2499568 | 292316 | 50.156 |

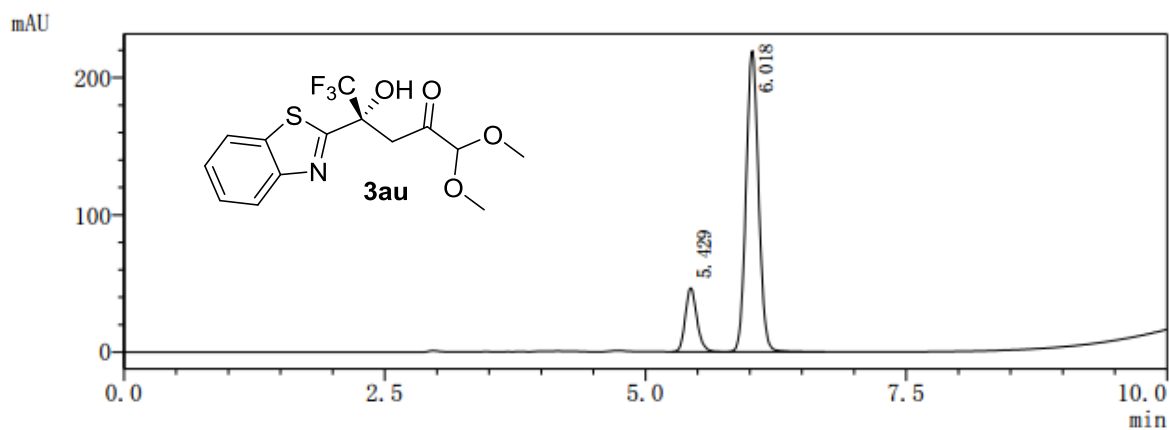

PDA Ch1 254nm 4nm

| Peak | Ret Time | Width | Area    | Height | Area % |
|------|----------|-------|---------|--------|--------|
| 1    | 5.429    | 0.218 | 362473  | 46466  | 16.538 |
| 2    | 6.018    | 0.234 | 1829291 | 219507 | 83.462 |

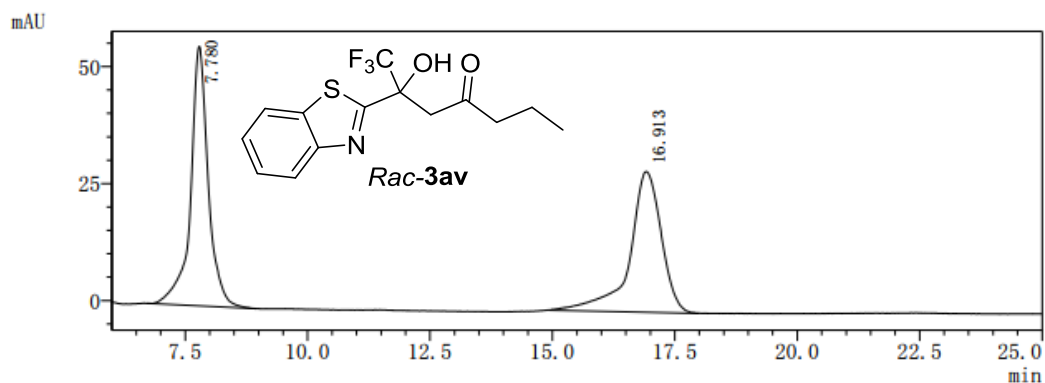

PDA Ch1 254nm 4nm

| Peak | Ret Time | Width | Area    | Height | Area % |
|------|----------|-------|---------|--------|--------|
| 1    | 7.780    | 0.576 | 1395477 | 55472  | 50.805 |
| 2    | 16.913   | 1.039 | 1351272 | 30048  | 49.195 |

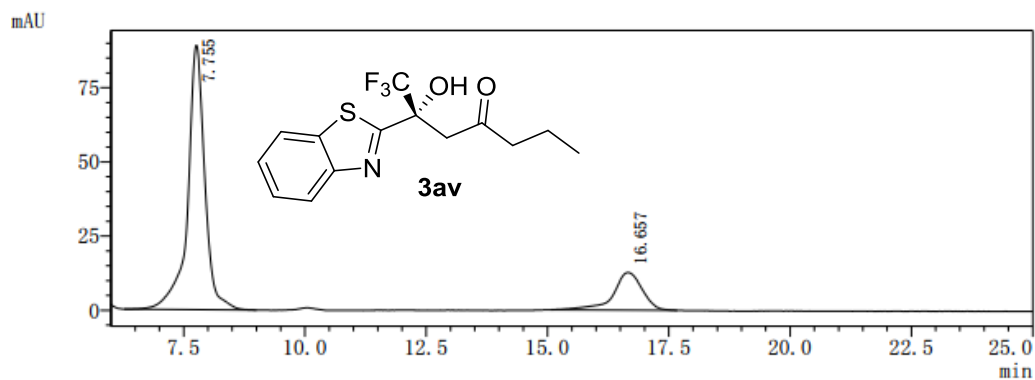

PDA Ch1 254nm 4nm

| Peak | Ret Time | Width | Area    | Height | Area % |
|------|----------|-------|---------|--------|--------|
| 1    | 7.755    | 0.565 | 2196386 | 89049  | 80.670 |
| 2    | 16.657   | 0.994 | 526302  | 12675  | 19.330 |

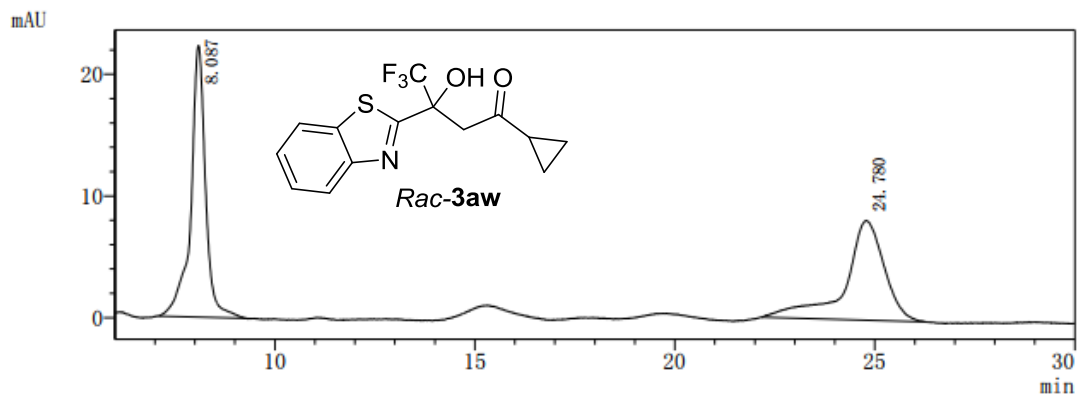

PDA Ch1 254nm 4nm

| Peak | Ret Time | Width | Area   | Height | Area % |
|------|----------|-------|--------|--------|--------|
| 1    | 8.087    | 0.569 | 573022 | 22318  | 50.705 |
| 2    | 24.780   | 1.473 | 557096 | 8175   | 49.295 |

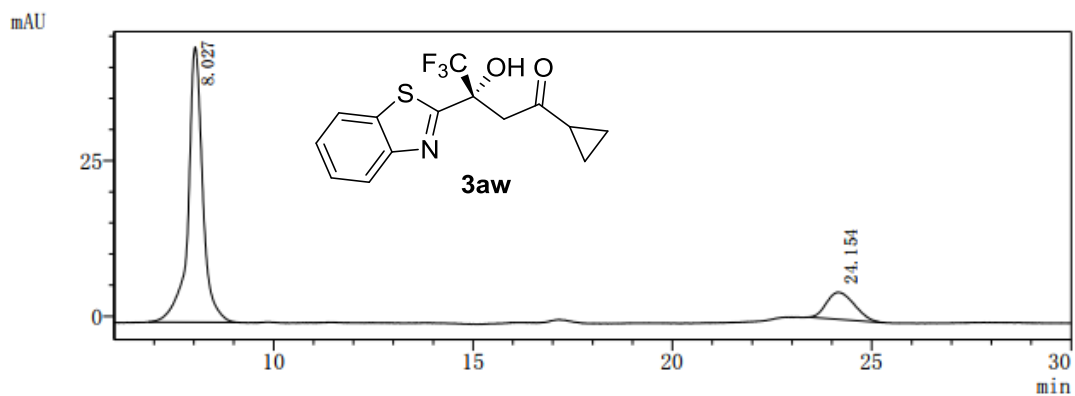

PDA Ch1 254nm 4nm

| Peak | Ret Time | Width | Area    | Height | Area % |
|------|----------|-------|---------|--------|--------|
| 1    | 8.027    | 0.572 | 1125660 | 44214  | 84.195 |
| 2    | 24.154   | 1.329 | 211304  | 4339   | 15.805 |

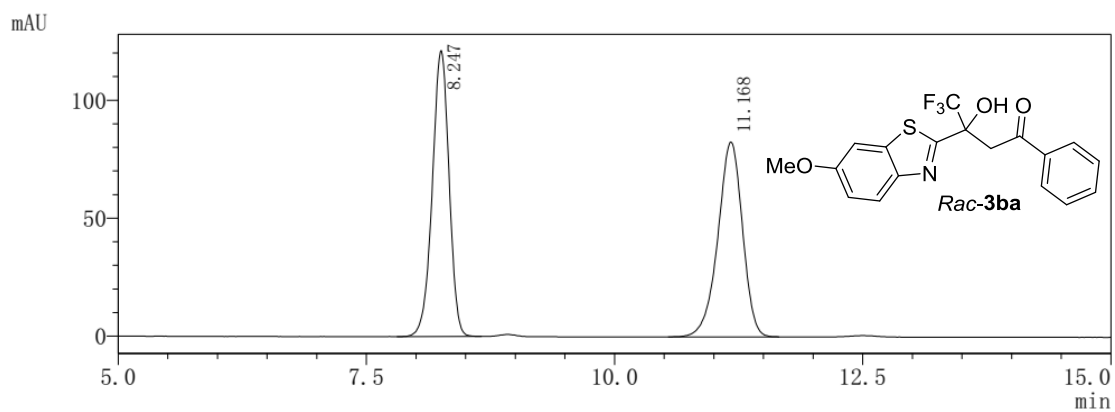

PDA Ch1 254nm 4nm

| Peak | Ret Time | Width | Area    | Height | Area % |
|------|----------|-------|---------|--------|--------|
| 1    | 8.247    | 0.319 | 1424734 | 121291 | 49.950 |
| 2    | 11.168   | 0.459 | 1427588 | 82581  | 50.050 |

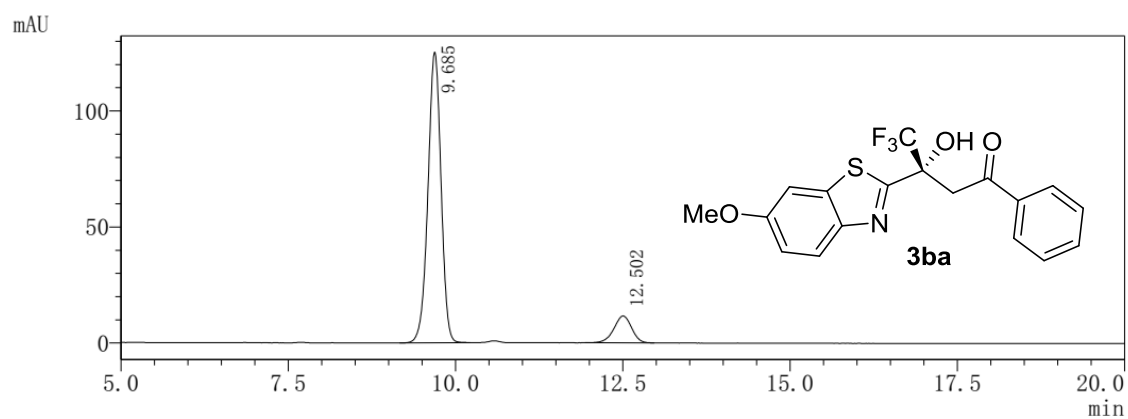

PDA Ch1 254nm 4nm

| Peak | Ret Time | Width | Area    | Height | Area % |
|------|----------|-------|---------|--------|--------|
| 1    | 9.685    | 0.365 | 1702035 | 125159 | 88.815 |
| 2    | 12.502   | 0.491 | 214342  | 11573  | 11.185 |

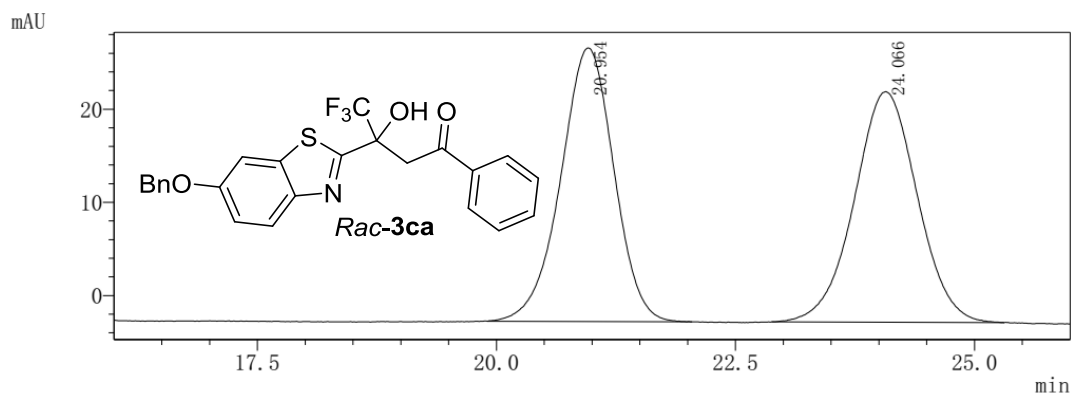

PDA Ch1 254nm 4nm

| Peak | Ret Time | Width | Area    | Height | Area % |
|------|----------|-------|---------|--------|--------|
| 1    | 20.954   | 1.018 | 1138711 | 29378  | 50.074 |
| 2    | 24.066   | 1.206 | 1135339 | 24750  | 49.926 |

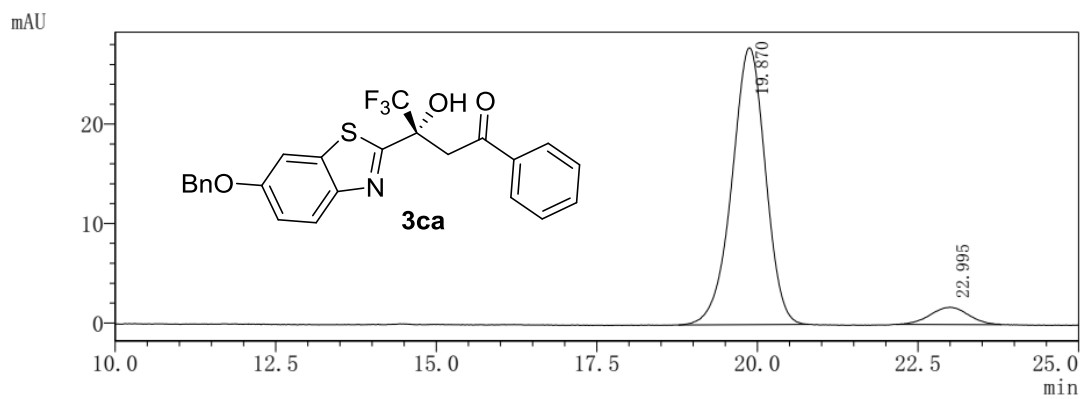

PDA Ch1 254nm 4nm

| Peak | Ret Time | Width | Area    | Height | Area % |
|------|----------|-------|---------|--------|--------|
| 1    | 19.870   | 0.958 | 1014408 | 27859  | 93.318 |
| 2    | 22.995   | 1.098 | 72636   | 1748   | 6.682  |

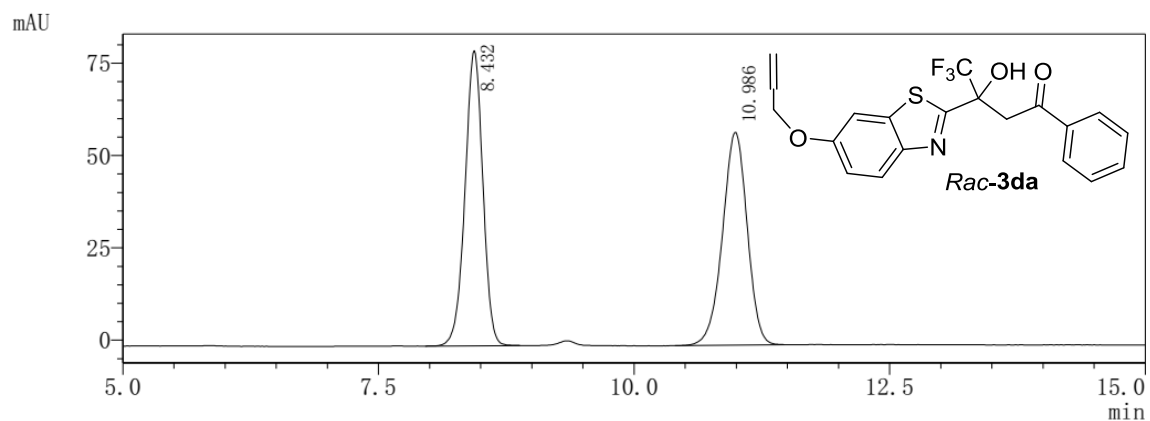

PDA Ch1 254nm 4nm

| Peak | Ret Time | Width | Area   | Height | Area % |
|------|----------|-------|--------|--------|--------|
| 1    | 8.432    | 0.330 | 972549 | 79956  | 50.097 |
| 2    | 10.986   | 0.449 | 968796 | 57649  | 49.903 |

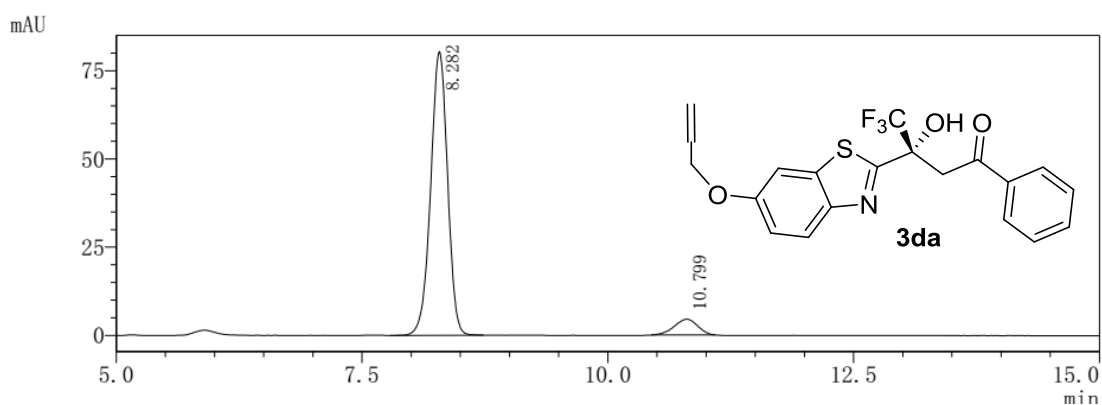

PDA Ch1 254nm 4nm

| Peak | Ret Time | Width | Area   | Height | Area % |
|------|----------|-------|--------|--------|--------|
| 1    | 8.282    | 0.324 | 961940 | 80461  | 92.904 |
| 2    | 10.799   | 0.453 | 73478  | 4472   | 7.096  |



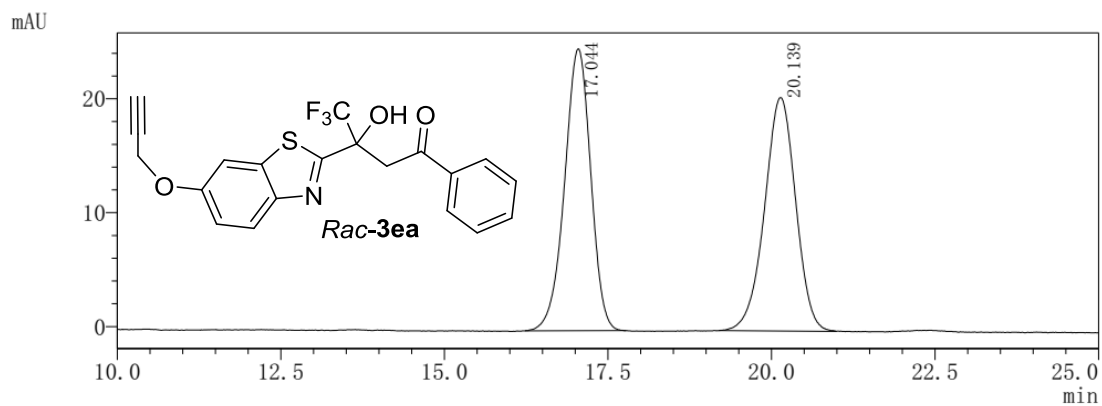

PDA Ch1 254nm 4nm

| Peak | Ret Time | Width | Area   | Height | Area % |
|------|----------|-------|--------|--------|--------|
| 1    | 17.044   | 0.733 | 688871 | 24759  | 50.297 |
| 2    | 20.139   | 0.874 | 680731 | 20494  | 49.703 |

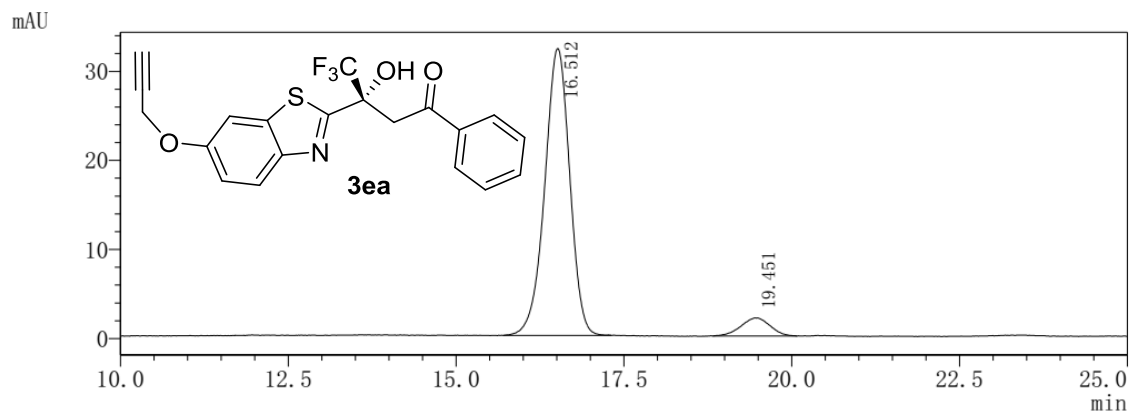

PDA Ch1 254nm 4nm

| Peak | Ret Time | Width | Area   | Height | Area % |
|------|----------|-------|--------|--------|--------|
| 1    | 16.512   | 0.681 | 834418 | 32211  | 93.141 |
| 2    | 19.451   | 0.812 | 61448  | 2030   | 6.859  |

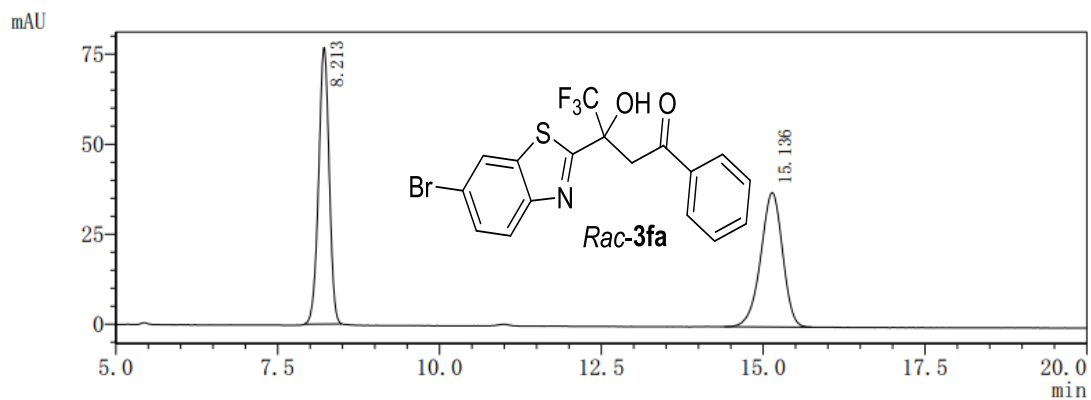

PDA Ch1 254nm 4nm

| Peak | Ret Time | Width | Area   | Height | Area % |
|------|----------|-------|--------|--------|--------|
| 1    | 8.213    | 0.310 | 869994 | 76716  | 49.778 |
| 2    | 15.136   | 0.621 | 877768 | 37316  | 50.222 |

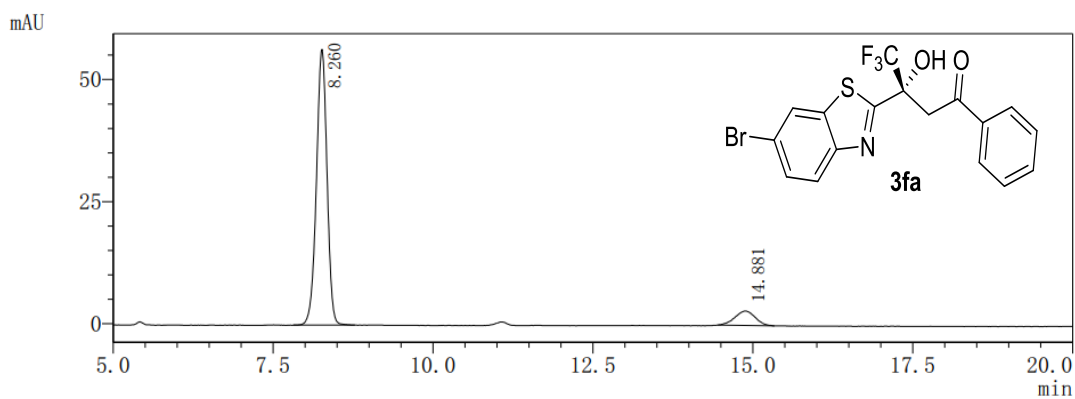

PDA Ch1 254nm 4nm

| Peak | Ret Time | Width | Area   | Height | Area % |
|------|----------|-------|--------|--------|--------|
| 1    | 8.260    | 0.313 | 650545 | 56507  | 91.038 |
| 2    | 14.881   | 0.600 | 64040  | 2941   | 8.962  |

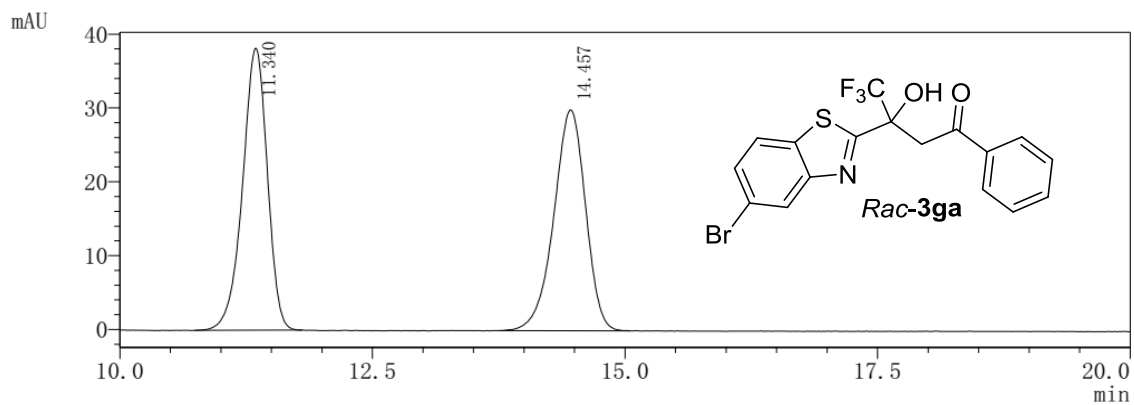

PDA Ch1 254nm 4nm

| Peak | Ret Time | Width | Area   | Height | Area % |
|------|----------|-------|--------|--------|--------|
| 1    | 11.340   | 0.453 | 652620 | 38207  | 49.946 |
| 2    | 14.457   | 0.578 | 654037 | 29924  | 50.054 |

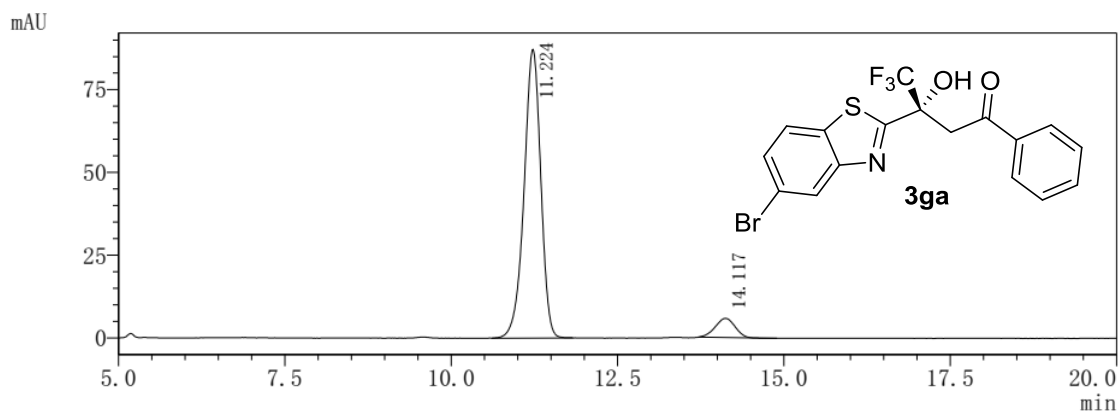

PDA Ch1 254nm 4nm

| Peak | Ret Time | Width | Area    | Height | Area % |
|------|----------|-------|---------|--------|--------|
| 1    | 11.224   | 0.463 | 1522239 | 87243  | 92.758 |
| 2    | 14.117   | 0.563 | 118843  | 5788   | 7.242  |

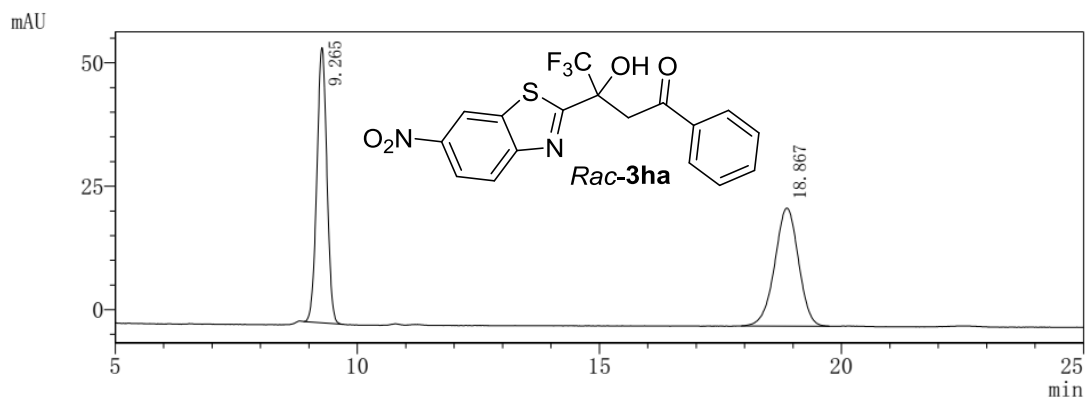

PDA Ch1 254nm 4nm

| Peak | Ret Time | Width | Area   | Height | Area % |
|------|----------|-------|--------|--------|--------|
| 1    | 9.265    | 0.389 | 801631 | 55760  | 49.594 |
| 2    | 18.867   | 0.901 | 814768 | 23915  | 50.406 |

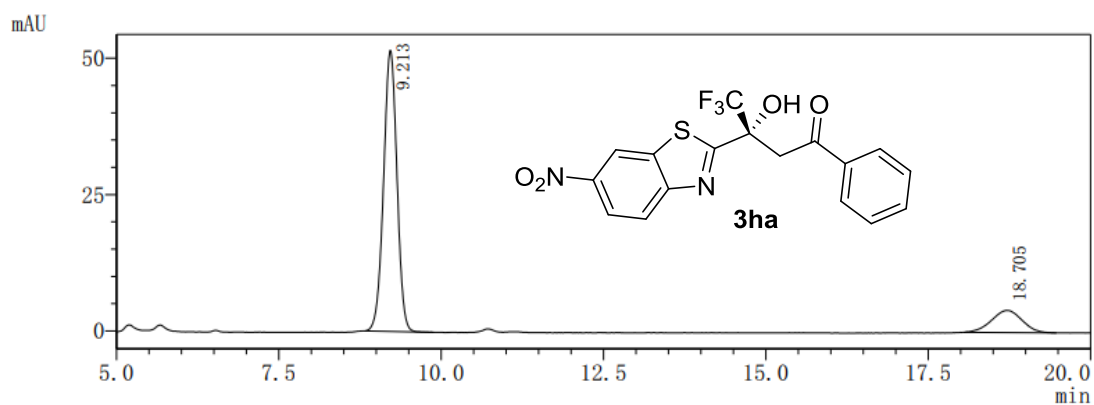

PDA Ch1 254nm 4nm

| Peak | Ret Time | Width | Area   | Height | Area % |
|------|----------|-------|--------|--------|--------|
| 1    | 9.213    | 0.388 | 740581 | 51545  | 84.814 |
| 2    | 18.705   | 0.882 | 132598 | 4062   | 15.186 |

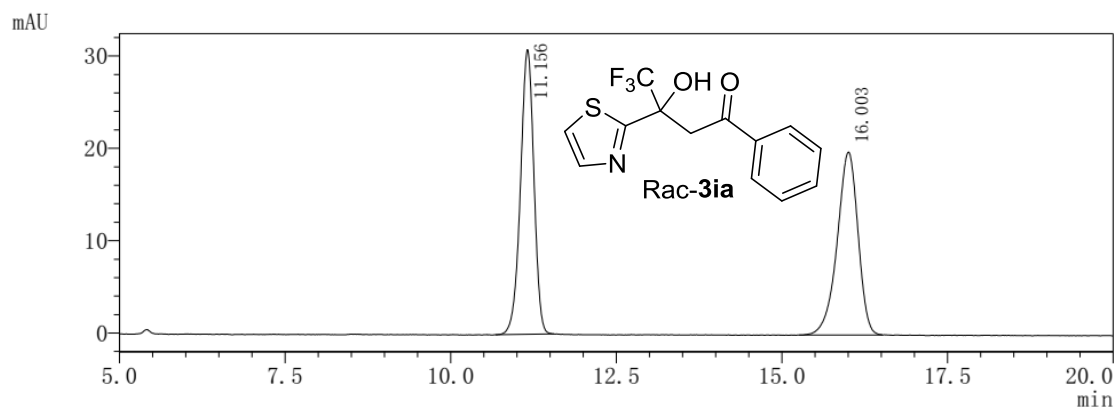

PDA Ch1 254nm 4nm

| Peak | Ret Time | Width | Area   | Height | Area % |
|------|----------|-------|--------|--------|--------|
| 1    | 11.156   | 0.379 | 434678 | 30823  | 50.005 |
| 2    | 16.003   | 0.577 | 434596 | 19827  | 49.995 |

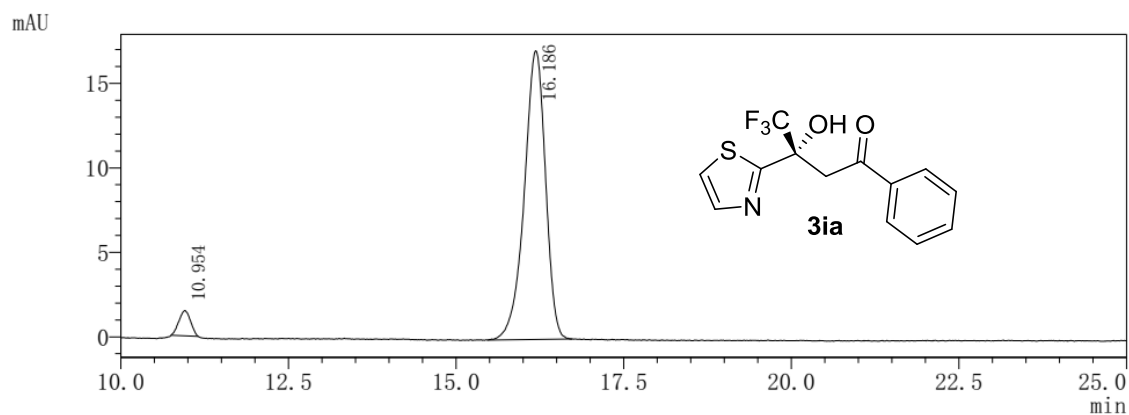

PDA Ch1 254nm 4nm

| Peak | Ret Time | Width | Area   | Height | Area % |
|------|----------|-------|--------|--------|--------|
| 1    | 10.954   | 0.345 | 17973  | 1494   | 4.556  |
| 2    | 16.186   | 0.577 | 376527 | 17096  | 95.444 |

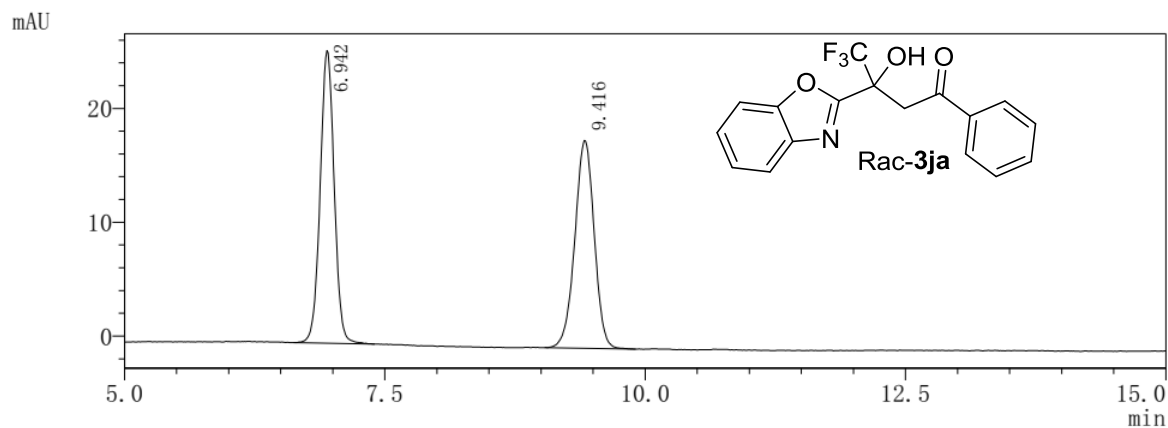

PDA Ch1 254nm 4nm

| Peak | Ret Time | Width | Area   | Height | Area % |
|------|----------|-------|--------|--------|--------|
| 1    | 6.942    | 0.258 | 240867 | 25708  | 50.411 |
| 2    | 9.416    | 0.350 | 236941 | 18270  | 49.589 |

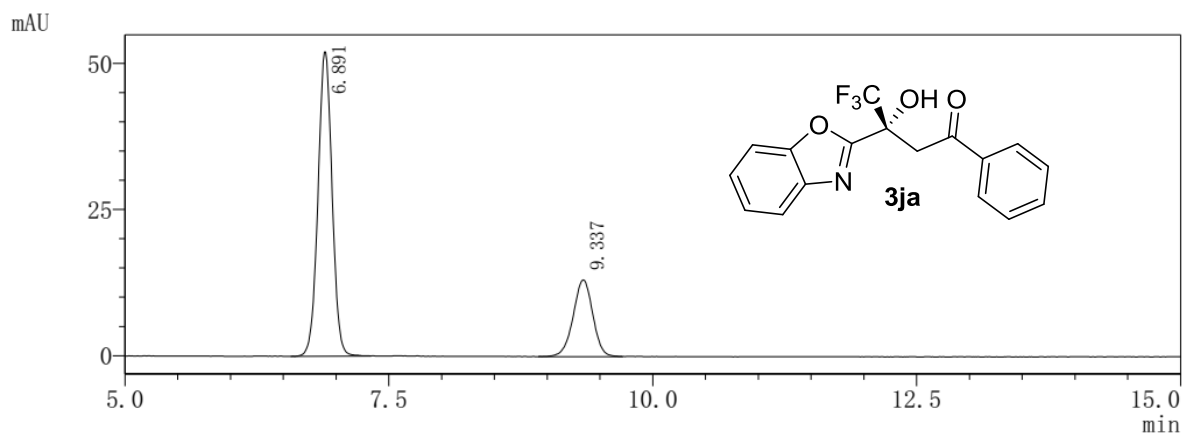

PDA Ch1 254nm 4nm

| Peak | Ret Time | Width | Area   | Height | Area % |
|------|----------|-------|--------|--------|--------|
| 1    | 6.891    | 0.256 | 482946 | 52051  | 73.989 |
| 2    | 9.337    | 0.348 | 169785 | 13127  | 26.011 |

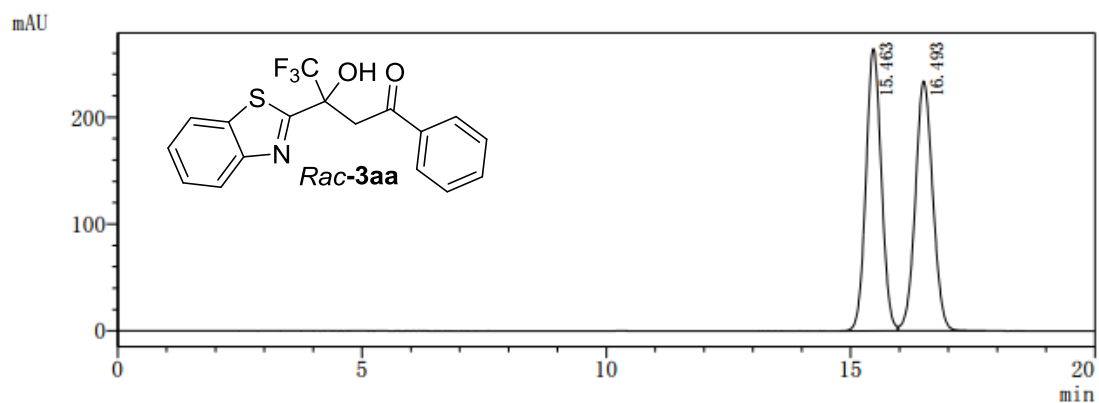

PDA Ch1 254nm 4nm

| Peak | Ret Time | Width | Area    | Height | Area % |
|------|----------|-------|---------|--------|--------|
| 1    | 15.463   | 0.586 | 5798162 | 264155 | 49.897 |
| 2    | 16.493   | 0.661 | 5822183 | 233885 | 50.103 |

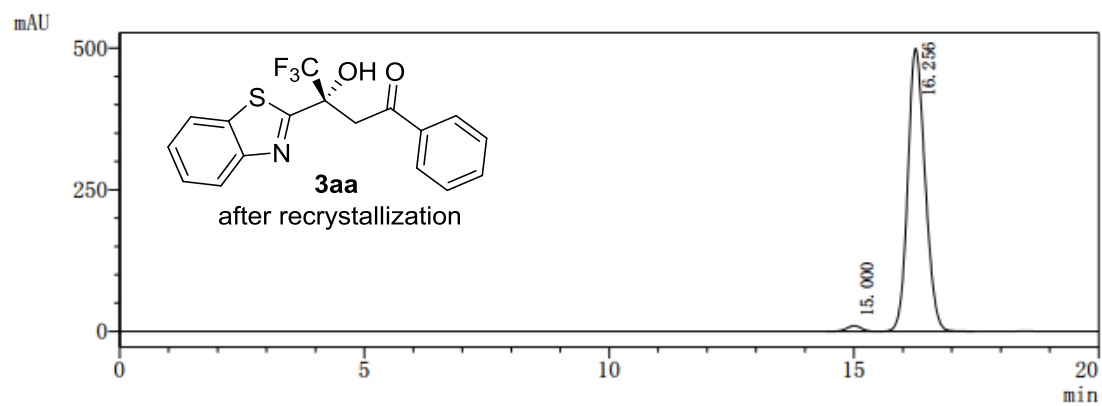

PDA Ch1 254nm 4nm

| Peak | Ret Time | Width | Area     | Height | Area % |
|------|----------|-------|----------|--------|--------|
| 1    | 15.000   | 0.562 | 207010   | 9919   | 1.657  |
| 2    | 16.256   | 0.655 | 12284441 | 499340 | 98.343 |

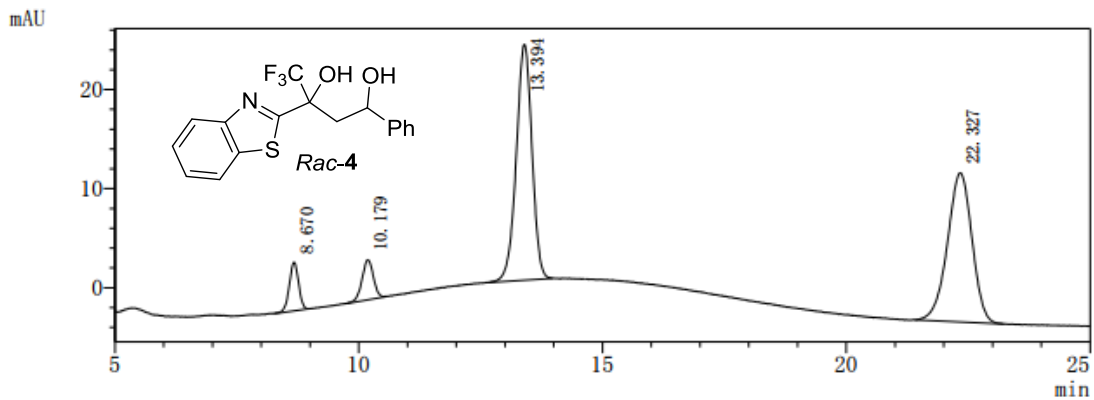

PDA Ch1 254nm 4nm

| Peak | Ret Time | Width | Area   | Height | Area % |
|------|----------|-------|--------|--------|--------|
| 1    | 8.670    | 0.361 | 65541  | 4909   | 5.496  |
| 2    | 10.179   | 0.436 | 65196  | 4033   | 5.467  |
| 3    | 13.394   | 0.595 | 534918 | 23792  | 44.855 |
| 4    | 22.327   | 0.927 | 526882 | 15024  | 44.182 |

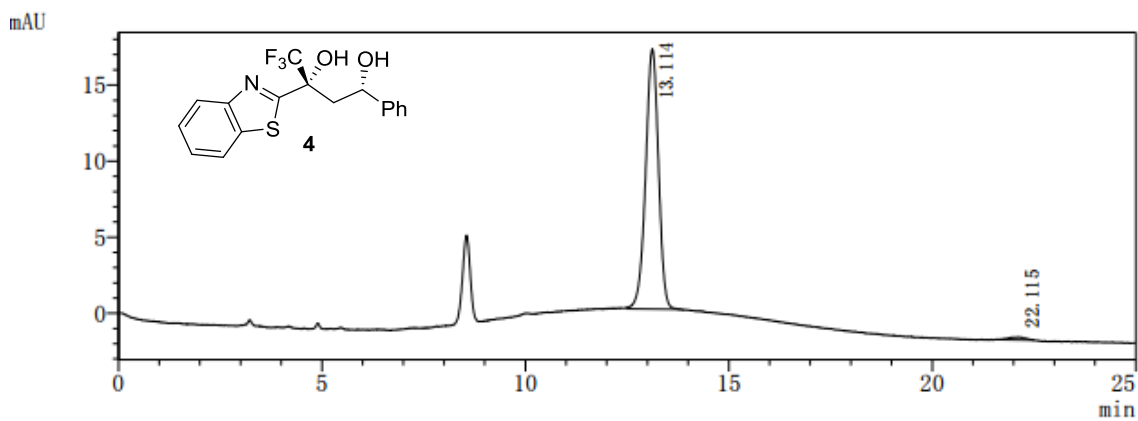

PDA Ch1 254nm 4nm

| Peak | Ret Time | Width | Area   | Height | Area % |
|------|----------|-------|--------|--------|--------|
| 1    | 13.114   | 0.582 | 376244 | 17102  | 98.665 |
| 2    | 22.115   | 0.759 | 5092   | 197    | 1.335  |



mAU

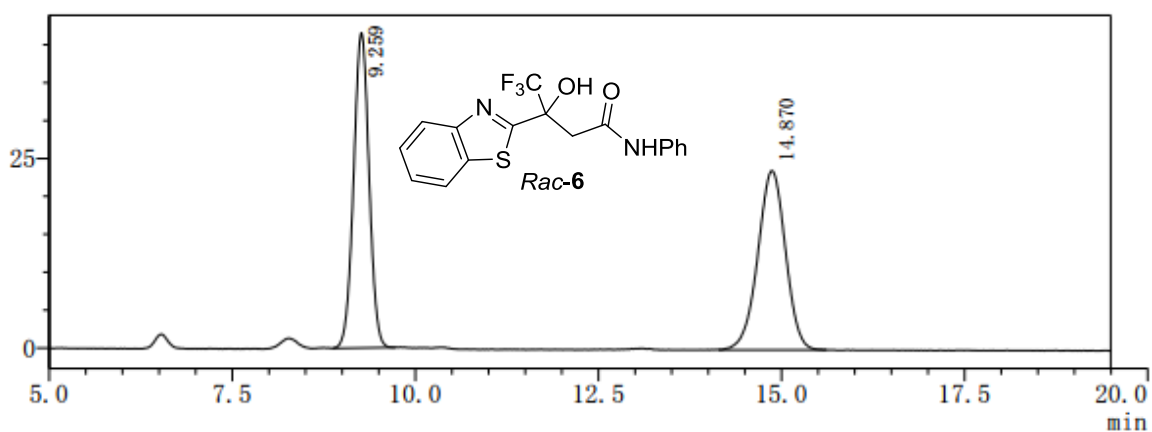

PDA Ch1 254nm 4nm

| Peak | Ret Time | Width | Area   | Height | Area % |
|------|----------|-------|--------|--------|--------|
| 1    | 9.259    | 0.399 | 613794 | 41535  | 49.606 |
| 2    | 14.870   | 0.696 | 623550 | 23647  | 50.394 |

mAU

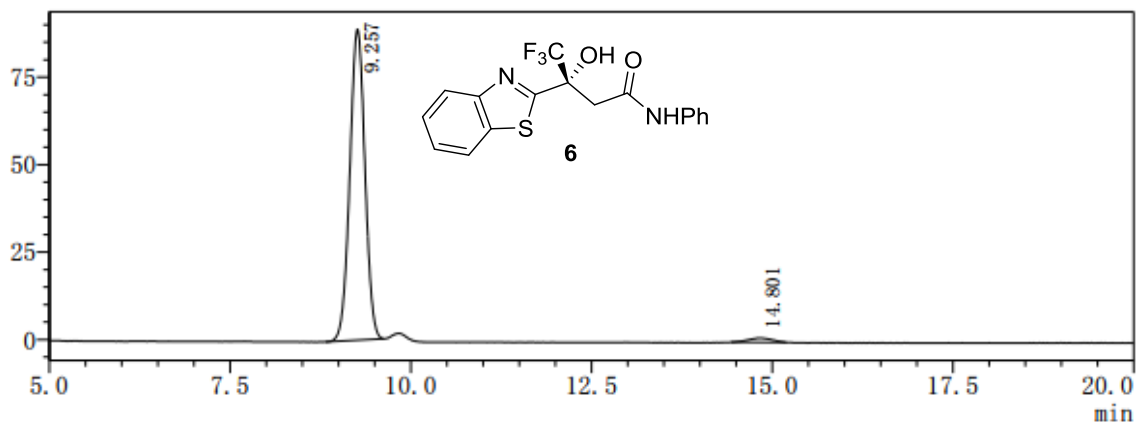

PDA Ch1 254nm 4nm

| Peak | Ret Time | Width | Area    | Height | Area % |
|------|----------|-------|---------|--------|--------|
| 1    | 9.257    | 0.396 | 1301473 | 88872  | 97.938 |
| 2    | 14.801   | 0.650 | 27401   | 1180   | 2.062  |
